# Supplementary material for: Pan-glioma analyses reveal species- and tumor-specific regulation of neuron-glioma synapse genes by lncRNAs
Source: Front Genet. 2023 Aug 24;14:1218408. doi: 10.3389/fgene.2023.1218408 (PMC10484416; doi:10.3389/fgene.2023.1218408)
Supplement: Supplementary file 1 [file Table1.XLSX]

## Sheet: README
Table S1	Dataset informations, including tumor types and sample numbers.
Table S2	NGS genes
Table S3	Different cell clusters
Table S4	DEGs between malignant and non-malignant cell clusters in 9 gliomas
Table S5	Predicted lncRNA-target gene relationships
Table S6	NGS gene expression levels in humans and mice
Table S7	GBM and LGG survival data

## Sheet: Table S1 Dataset information
Dataset informations
Organism	ID	Disease		WTO Grade	Number of samples	Number of cells	Number of genes	sequencing protocol
human	GSE131928	GBM		IV	20	5742	23686	Smart-seq
human	GSE102130	diffuse H3K27M glioma		IV	6	3193	23686	Smart-seq
human	GSE119926	Medulloblastoma		IV	25	7255	23686	Smart-seq
human	GSE119926	Medulloblastoma PDX		IV	11	900	23686	Smart-seq
human	GSE89567	IDH1-mutant anaplastic astrocytoma		III	7	4922	23686	Smart-seq
human	GSE70630	oligodendroglioma,1p/19q codeleted		II	3	2874	23686	Smart-seq
human	GSE131928	GBM pediatric		IV	7	1969	23686	Smart-seq
mouse	GSE122871	GBM transgenic		IV	1	4955	20463	Drop-seq
mouse	GSE150752	Medulloblastoma transgenic		IV	1	9150	15842	10X
Cohort and Metadata
GEO accession	glioma	samples	age	Primary or Recurrence	gene mutations
GSE119926	Medulloblastoma (MB)	SJ516	9	primary	CTNNB1.S37F, KMT2D.Q3133*
		MUV44	9	primary	CTNNB1.S37Y, DDX3X.T275M, TP53.A161T
		BCH807	12	primary	CTNNB1.G34V
		SJ99	17	primary	CTNNB1.G34V, DDX3X.R376P, PTCH1.R138fs, SMARCA4.R1135W, TP53.R273C
		SJ129	17	primary	CTNNB1.G34V
		MUV41	4	primary	KMT2C.R2066*
		SJ454	3	primary	TP53.R273H
		SJ577	13	primary	PTCH1.N872fs
		MUV11	6	primary	MED12.K32del, KMT2D.E605*
		SJ17	3	primary	Not mentioned
		SJ917	11	primary	Not mentioned
		SJ617	6	primary	NA
		MUV29	4	recurrence	NA
		BCH1205	3	primary	NA
		MUV34	4	primary	Not mentioned
		BCH825	8	primary	NA
		SJ625	9	primary	Not mentioned
		MUV39	11	primary	OTX2.Q103R
		SJ723	13	primary	Not mentioned
		SJ217	10	primary	Not mentioned
		MUV27	7	primary	Not mentioned
		BCH1031	12	primary	NA
		MUV19	16	primary	ZMYM3.E1148*
		MUV37	10	recurrence	ZIC1.K350E
		SJ970	8	primary	NA
GSE119926	Medulloblastoma PDX (MB_PDX)	RCMB24	12	Not mentioned	NA
		RCMB18	7	Not mentioned	NA
		Med114FH	6.6	Not mentioned	NA
		Med2112FH	7	Not mentioned	NA
		Med211FH	2.8	Not mentioned	NA
		Med411FH	3	Not mentioned	NA
		RCMB20	2	Not mentioned	NA
		Icb1299	2.8	Not mentioned	NA
		Icb1572	14.8	Not mentioned	NA
		Med2312FH	2.8	Not mentioned	NA
		DMB006	8	Not mentioned	NA
GSE102130	diffuse H3K27M glioma (H3K277M gliomas)	MUV1	4	primary	H3F3A.K27M, BRAF.V600E
		MUV5	2.5	primary	HIST1H3B.K27M
		MUV10	9	primary	H3F3A.K27M, ASXL1.R693*, PDGFRA.K385L
		BCH836	5	primary	H3F3A.K27M, ACVR1.G328E, PIK3CA.H1047R, TP53.N288fs
		BCH869	7	primary	H3F3A.K27M, ACVR1.R206H, PIK3CA.E39K, PIK3CA.G1007R, PPM1D.Q510fs
		BCH1126	10	primary	H3F3A.K27M
GSE89567	IDH1-mutant anaplastic astrocytoma	MGH42	47	primary	IDH1.R132H
		MGH43	45	recurrence	IDH1.R132H
		MGH44	32	primary	IDH1.R132H
		MGH56	31	primary	IDH1.R132H
		MGH61	24	primary	IDH1.R132H
		MGH64	40	primary	IDH1.R132H
		MGH103	26	primary	IDH1.R132H
GSE131928	Glioblastoma (GBM)	MGH66	67 yo	primary	ATRX retained, p53 positive, EGFR positive, MGMT methylated
		MGH100	71 yo	primary	ATRX retained, p53 positive, MGMT methylated
		MGH101	52 yo	primary	ATRX retained, p53 indeterminate
		MGH102	65 yo	primary	ATRX retained, mutations in PTEN and TP53
		MGH104	65 yo	primary	ATRX retained, p53 positive, EGFR positive
		MGH105	67 yo	primary	ATRX retained, p53 positive,EGFR positive
		MGH106	66 yo	primary	ATRX retained, p53 positive, EGFR positive
		MGH110	61 yo	primary	ATRX retained, mutations in SMARCB1, PIK3R1, FBXW7, DAXX and TP53
		MGH113	65 yo	primary	ATRX retained, p53 positive, mutations in PTEN and TERT, EGFR positive
		MGH115	69 yo	primary	ATRX retained, p53 positive, mutations in TERT, EGFR positive
		MGH121	63 yo	primary	ATRX retained, p53 positive
		MGH122	63 yo	primary	ATRX retained, p53 positive
		MGH124	68 yo	primary	ATRX retained, p53 positive
		MGH125	76 yo	primary	ATRX retained, p53 negative
		MGH128	65 yo	primary	ATRX lost, p53 positive, mutations in PIK3R1/ATRX, CNV in CDKN2A, MGMT methylated
		MGH129	78 yo	primary	ATRX retained, p53 indeterminate, EGFR positive
		MGH136	71 yo	primary	ATRX retained, p53 positive, mutations in PTEN, CDKN2A, TERT AND MDM4
		MGH143	62 yo	primary	ATRX retained, p53 indeterminate, mutations in TP63, CDKN2A, TP53, EGFR, AKT1 and TERT, EGFR positive
		MGH151	65 yo	primary	ATRX retained, p53 positive, mutations in MET, STAG2, EGFR, PTEN, CDK4, MDM2 and TERT, EGFR positive, MET positive
		MGH152	52 yo	primary	ATRX retained, p53 indeterminate, mutations in CDK4, ATRX, EGFR, CCND2 and TP53, EGFR positive, MGMT methylated
GSE131928	Glioblastoma pediatric (pediatric-GBM)	MGH85	7 yo	recurrence	H3K27M negative, BRAF V600E negative
		BT749	9 mo	primary	INI-1 retained
		BT771	12 yo	primary	BRAF V600E negative, MGMT methylated
		BT786	13 yo	recurrence	p53 positive, INI-1 retained
		BT830	7 yo	primary	H3K27M negative, BRAF V600E negative, p53 positive, INI-1 retained
		BT920	6 wo	primary	H3K27M negative, BRAF V600E negative, ALK positive, INI-1 retained
		BT1160	11 yo	primary	H3K27M negative, BRAF V600E negative, ATRX lost, p53 positive, ALK negative, INI-1 retained
GSE70630	oligodendroglioma,1p/19q codeleted (OD)	MGH36	67	Not mentioned	Not mentioned
		MGH53	31	Not mentioned	ZNF362 p.D289G,IGSF3 p.E117E,LCE1A p.P13P,KIAA0907 p.Q448P,KIAA0907 p.Q446P,SH2D2A p.Q357P,SH2D2A p.H356P,DARS2 p.V48F,CR1 p.R2194*,LYST p.E1851A,FMN2 p.P1108P,CEP170 p.I1292I,CEP170 p.R582R,KIF26B p.K479N,C2orf71 p.P1083P,ALK p.G869G,EIF2AK2 p.D38A,CTNNA2 p.N351H,IL1RL2 p.D275A,RGPD3 p.N756D,RAPH1 p.K371R,ADAM23 p.I614I,CPO p.S306A,IDH1 p.R132H,IRS1 p.K943Q,TPRXL p.S166S,NGLY1 p.I527I,PLXNB1 p.T…
		MGH54	35	Not mentioned	CEP85 p.G11E,LRP8 p.L24Q,DOCK7 p.F1910C,KIAA0907 p.Q448P,KIAA0907 p.Q446P,SH2D2A p.A361P,SH2D2A p.Q357P,LRRC71 p.H88P,CPSF3 p.R594K,CTNNA2 p.N351H,GTF3C3 p.E103E,EEF1B2 p.S43G,EEF1B2 p.P45P,CPO p.S306A,IDH1 p.R132H,ZBTB47 p.E284D,PLXNB1 p.P694P,EFCAB12 p.V539L,PIK3CB p.N421H,IQCJ-SCHIP1 p.E201K,OTOP1 p.R122R,LGI2 p.E307K,BMP6 p.Q118L,LRRC16A p.L823L,SCAND3 p.T426I,RNF5 p.T136I,TTK p.S108I,ORC3 p.…
GSE122871	Glioblastoma transgenic			Not mentioned	Not mentioned
GSE150752	Medulloblastoma trasngenic			Not mentioned	Not mentioned

## Sheet: TableS2 NGS genes
NGS gene source
Gene	Function	Source
GAP43	tumor microtube	Osswald et al., 2015
PTPRS	synaptogenesis	Venkatesh et al., 2019
ARHGEF2	synaptogenesis	Venkatesh et al., 2019
DNM3	synaptogenesis	Venkatesh et al., 2019
LRRTM2	synaptogenesis	Venkatesh et al., 2019
NLGN4X	synaptogenesis	Venkatesh et al., 2019
NRCAM	synaptogenesis	Venkatesh et al., 2019
MAP2	synaptogenesis	Venkatesh et al., 2019
INA	synaptogenesis	Venkatesh et al., 2019
TMPRSS9	synaptogenesis	Venkatesh et al., 2019
NLGN3	synaptogenesis	Venkatesh et al., 2019
HOMER1	synaptogenesis	Venkatesh et al., 2019; Venkataramani et al., 2019
DLG4	synaptogenesis	Venkatesh et al., 2019
HOMER2	synaptogenesis	Venkataramani et al., 2019
HOMER3	synaptogenesis	Venkataramani et al., 2019
NLGN1	synaptogenesis	Venkataramani et al., 2019
NLGN2	synaptogenesis	Venkataramani et al., 2019
LRFN1	synaptogenesis	Venkataramani et al., 2019
CADM1	synaptogenesis	Venkataramani et al., 2019
EFNB2	synaptogenesis	Venkataramani et al., 2019
GRIA1	neurotransmitter receptor	Venkatesh et al., 2019; Venkataramani et al., 2019
GRIA2	neurotransmitter receptor	Venkatesh et al., 2019; Venkataramani et al., 2019
GRIA3	neurotransmitter receptor	Venkatesh et al., 2019; Venkataramani et al., 2019
GRIA4	neurotransmitter receptor	Venkataramani et al., 2019
GRIK2	neurotransmitter receptor	Venkatesh et al., 2019; Venkataramani et al., 2019
GRIK3	neurotransmitter receptor	Venkataramani et al., 2019
GRIK4	neurotransmitter receptor	Venkataramani et al., 2019
GRIK5	neurotransmitter receptor	Venkatesh et al., 2019; Venkataramani et al., 2019
GABRA3	neurotransmitter receptor	Venkataramani et al., 2019
GABRB3	neurotransmitter receptor	Venkataramani et al., 2019
GABBR1	neurotransmitter receptor	Venkataramani et al., 2019
GABBR2	neurotransmitter receptor	Venkataramani et al., 2019
GLRB	neurotransmitter receptor	Venkataramani et al., 2019

## Sheet: Table S3 CellClusteres
Dataset	Sample	cluster 0	cluster 1	cluster 2	cluster 3	cluster 4	cluster 5	cluster 6	cluster 7	cluster 8	cluster 9	cluster 10	cluster 11	cluster 12	cluster 13
GSE131928	MGH100	44	20	58	0	44	4	39	0	0	0	0	0	0	0
GSE131928	MGH101	109	5	12	46	28	0	0	0	0	0	0	0	0	0
GSE131928	MGH102	2	1	20	96	3	144	36	0	0	0	10	0	0	0
GSE131928	MGH104	44	178	92	0	41	0	0	0	0	0	0	0	0	0
GSE131928	MGH105	179	39	13	201	152	1	9	1	0	0	31	2	0	6
GSE131928	MGH106	83	7	5	9	35	3	1	0	0	0	0	2	0	55
GSE131928	MGH110	1	5	18	4	4	1	0	0	272	0	49	0	0	5
GSE131928	MGH113	9	6	14	42	29	4	2	0	1	0	0	149	0	4
GSE131928	MGH115	85	7	2	7	61	0	1	0	0	0	0	1	0	1
GSE131928	MGH121	28	186	31	0	28	3	12	0	0	0	5	4	0	0
GSE131928	MGH122	1	2	17	49	17	85	77	0	0	0	23	0	0	2
GSE131928	MGH124	5	5	58	42	17	161	70	0	1	0	1	10	0	0
GSE131928	MGH125	2	9	38	40	0	1	7	275	0	0	19	0	0	8
GSE131928	MGH128	13	1	8	0	11	5	0	0	0	0	25	0	121	0
GSE131928	MGH129	106	47	8	0	8	21	0	0	0	0	2	0	0	0
GSE131928	MGH136	3	3	65	0	7	50	95	0	0	0	2	6	0	0
GSE131928	MGH143	6	203	33	0	10	21	0	0	0	0	1	0	0	0
GSE131928	MGH151	13	81	13	0	0	1	9	4	0	0	42	0	0	0
GSE131928	MGH152	0	0	1	0	2	0	0	0	0	225	1	0	0	0
GSE131928	MGH66	321	27	65	0	12	1	10	0	0	0	0	0	0	0
GSE131928	NGS-	394	380	335	0	422	92	34	30	27	195	0	19	103	0
GSE131928	NGS+	653	448	235	0	77	411	312	250	244	30	0	154	17	0
GSE131928	Non-malignant	7	4	1	536	10	3	22	0	3	0	211	1	1	81
Dataset	Sample	0	1	2	3	4	5	6	7	8	9
GSE131928_pediatric	BT1160	0	0	238	0	0	0	0	97	0	0
GSE131928_pediatric	BT749	2	0	1	0	214	0	0	2	98	0
GSE131928_pediatric	BT771	305	0	7	0	5	0	0	12	3	7
GSE131928_pediatric	BT786	2	0	0	0	0	0	209	0	0	1
GSE131928_pediatric	BT830	1	1	1	0	0	216	0	1	0	0
GSE131928_pediatric	BT920	2	276	1	0	7	0	0	0	2	13
GSE131928_pediatric	MGH85	2	0	1	241	0	0	0	1	0	0
GSE131928_pediatric	NGS-	157	97	88	61	33	202	193	70	65	0
GSE131928_pediatric	NGS+	103	157	159	175	175	13	11	43	22	0
GSE131928_pediatric	Non-malignant	54	23	2	5	18	1	5	0	16	21
Dataset	Sample	0	1	2	3	4	5	6	7	8	9	10	11	12
GSE89567	MGH103	71	0	0	0	0	0	0	0	39	0	2	0	0
GSE89567	MGH42	7	0	0	1	412	0	1	1	2	190	27	0	15
GSE89567	MGH43	215	1	0	0	0	0	7	211	19	3	5	35	0
GSE89567	MGH44	531	0	1	0	0	1	39	7	14	0	17	5	0
GSE89567	MGH56	2	805	1	0	0	0	71	0	1	0	25	10	1
GSE89567	MGH61	13	1	738	0	0	339	85	1	71	0	47	4	51
GSE89567	MGH64	7	0	0	580	2	0	92	1	58	2	12	23	0
GSE89567	NGS-	200	21	98	188	54	24	0	0	127	0	61	0	12
GSE89567	NGS+	629	760	623	384	351	307	0	0	74	0	74	0	53
GSE89567	Non-malignant	17	26	19	9	9	9	295	221	3	195	0	77	2
Dataset	Sample	0	1	2	3	4	5	6	7
GSE70630	MGH36	24	4	376	20	257	94	13	0
GSE70630	MGH53	32	599	2	47	0	101	46	34
GSE70630	MGH54	873	17	0	260	0	40	24	11
GSE70630	NGS-	114	111	298	120	113	0	30	0
GSE70630	NGS+	795	485	64	193	133	0	52	0
GSE70630	Non-malignant	20	24	16	14	11	235	1	45
Dataset	Sample	0	1	2	3	4	5	6	7	8	9	10	11	12	13	14	15
GSE102130	BCH1126	0	0	5	0	0	16	216	0	0	0	1	18	34	0	0	2
GSE102130	BCH836	0	392	4	0	0	12	0	2	0	0	24	34	52	0	0	1
GSE102130	BCH869	0	1	309	0	225	126	3	202	185	172	0	2	1	83	0	1
GSE102130	MUV1	0	0	0	0	0	3	0	2	0	0	131	4	0	0	0	1
GSE102130	MUV10	0	0	0	256	0	0	1	0	2	0	1	0	0	0	0	0
GSE102130	MUV5	440	0	1	0	0	64	1	0	0	0	14	32	0	0	77	40
GSE102130	NGS-	191	11	69	19	196	83	47	118	168	154	10	0	0	76	37	13
GSE102130	NGS+	218	347	221	224	24	121	140	80	14	12	114	0	0	0	5	21
GSE102130	Non-malignant	31	35	29	13	5	17	34	8	5	6	47	90	87	7	35	11
Dataset	Sample	0	1	2	3	4	5	6	7	8	9	10	11	12	13	14	15	16	17	18	19	20	21	22	23	24	25	26	27
GSE119926	BCH1031	219	0	0	0	0	0	0	0	0	0	0	0	0	0	0	0	25	0	1	1	0	0	0	0	0	0	0	0
GSE119926	BCH1205	0	0	0	0	0	325	0	0	1	0	0	0	0	0	0	0	0	0	0	0	0	0	0	0	0	0	0	0
GSE119926	BCH807	0	1	0	0	0	0	0	0	0	0	0	0	0	0	0	0	0	0	0	0	0	200	0	97	0	0	0	0
GSE119926	BCH825	0	0	0	0	0	0	0	0	0	0	294	0	0	0	0	0	24	0	0	0	0	0	0	0	0	0	0	0
GSE119926	MUV11	0	0	381	0	1	0	0	0	0	0	9	0	0	0	0	0	1	1	1	0	0	0	0	0	0	0	0	0
GSE119926	MUV19	257	0	0	0	0	0	0	0	0	0	0	0	0	0	0	0	23	0	0	3	0	0	0	0	0	0	0	0
GSE119926	MUV27	5	0	0	0	0	0	0	0	0	0	0	0	0	268	0	0	25	0	0	3	0	0	0	0	0	0	0	0
GSE119926	MUV29	0	0	0	0	0	0	0	0	308	0	0	0	0	0	0	0	1	0	0	0	0	0	0	0	0	0	0	0
GSE119926	MUV34	0	0	0	0	0	0	0	0	0	0	0	0	0	0	0	0	2	0	225	1	0	0	0	0	0	0	0	0
GSE119926	MUV37	98	0	0	0	0	0	0	0	0	0	0	0	0	0	0	0	42	0	0	0	0	0	0	0	0	0	0	0
GSE119926	MUV39	3	0	0	0	0	0	0	0	0	0	2	0	0	3	0	0	7	1	1	213	0	0	0	0	0	0	0	0
GSE119926	MUV41	1	0	0	0	0	0	0	0	0	312	0	0	0	0	0	0	0	0	0	0	0	0	0	0	0	8	0	0
GSE119926	MUV44	0	2	0	0	1	0	0	0	0	0	0	0	0	0	0	0	0	0	0	0	203	0	0	0	51	0	31	0
GSE119926	SJ129	0	36	0	0	0	0	0	0	0	0	0	0	0	0	252	0	1	0	0	0	0	0	0	0	20	0	4	0
GSE119926	SJ17	0	0	0	331	0	0	0	1	0	0	0	0	0	0	0	0	0	0	1	0	0	0	0	0	0	0	0	0
GSE119926	SJ217	1	0	0	0	0	0	0	0	0	0	0	0	0	0	0	0	72	205	1	0	0	0	0	0	0	0	0	0
GSE119926	SJ454	0	0	0	0	0	0	1	0	0	0	0	0	0	0	0	249	0	0	0	0	0	0	1	0	0	37	0	0
GSE119926	SJ516	0	419	0	0	0	0	0	0	0	0	0	0	0	0	0	0	0	0	0	0	0	0	0	0	21	0	43	0
GSE119926	SJ577	0	0	0	0	0	0	324	0	0	0	0	0	0	0	0	0	0	0	0	0	0	0	103	0	0	36	0	0
GSE119926	SJ617	0	0	1	0	0	0	0	319	0	0	0	0	0	0	0	0	0	0	0	0	0	0	0	0	0	0	0	56
GSE119926	SJ625	0	0	0	0	0	0	0	0	0	0	3	0	289	0	0	0	3	0	0	0	0	0	0	0	0	0	0	0
GSE119926	SJ723	4	0	0	0	0	0	0	0	0	0	0	0	0	0	0	0	16	36	0	0	0	0	0	0	0	0	0	0
GSE119926	SJ917	0	0	0	0	0	0	0	0	0	0	0	307	0	0	0	0	0	0	0	0	0	0	0	0	0	0	0	0
GSE119926	SJ970	43	0	0	0	0	0	0	0	0	0	0	0	0	0	0	0	2	1	0	0	0	0	0	0	0	0	0	0
GSE119926	SJ99	0	1	0	0	324	0	0	0	3	0	0	0	0	0	0	0	0	0	0	0	0	0	0	0	4	0	2	0
GSE119926	NGS-	341	263	308	325	232	302	72	229	259	19	232	249	59	142	205	67	186	108	93	218	92	44	0	60	86	41	60	55
GSE119926	NGS+	290	196	74	6	94	23	253	91	53	293	76	58	230	129	47	182	58	136	137	3	111	155	104	37	10	40	20	1
GSE119926	Non-malignant	0	0	0	0	0	0	0	0	0	0	0	0	0	0	0	0	0	0	0	0	0	1	0	0	0	0	0	0
Dataset	Sample	0	1	2	3	4	5	6	7	8	9
GSE119926 PDX	DMB006	0	2	0	0	0	72	0	0	0	0
GSE119926 PDX	Icb1299	0	0	0	82	0	0	0	0	0	0
GSE119926 PDX	Icb1572	0	0	0	0	81	0	0	0	0	0
GSE119926 PDX	Med114FH	0	44	0	0	0	0	0	0	0	0
GSE119926 PDX	Med2112FH	0	0	0	0	0	0	72	0	0	0
GSE119926 PDX	Med211FH	0	0	0	0	0	0	0	0	65	0
GSE119926 PDX	Med2312FH	0	0	0	0	0	0	0	68	0	0
GSE119926 PDX	Med411FH	0	72	0	0	0	0	0	0	0	0
GSE119926 PDX	RCMB18	166	0	0	0	0	0	0	0	0	0
GSE119926 PDX	RCMB20	0	2	0	0	0	0	0	0	0	58
GSE119926 PDX	RCMB24	0	0	116	0	0	0	0	0	0	0
GSE119926 PDX	NGS-	70	94	44	60	76	34	59	33	56	54
GSE119926 PDX	NGS+	96	26	72	22	5	38	13	35	9	4
GSE119926 PDX	Non-malignant	0	0	0	0	0	0	0	0	0	0
Dataset	Sample	0	1	2	3	4	5	6	7	8	9
GSE150752	GSE150752	2123	1938	1867	1163	828	638	248	246	78	21
GSE150752	NGS-	535	1485	1358	904	557	550	4	14	24	0
GSE150752	NGS+	1588	453	509	259	271	88	24	5	53	0
GSE150752	Non-malignant	0	0	0	0	0	0	220	227	1	21
Dataset	Sample	0	1	2	3	4	5	6	7	8	9	10	11	12	13	14
GSE122871	GSM3487549	940	883	619	530	451	419	344	333	144	84	72	44	39	39	14
GSE122871	NGS-	532	503	152	285	189	281	0	167	88	0	22	16	0	11	3
GSE122871	NGS+	340	361	408	239	197	125	4	166	46	0	38	2	0	17	2
GSE122871	Non-malignant	68	19	59	6	65	13	340	0	10	84	12	26	39	11	9

## Sheet: Table S4 DEGs in gliomas
GSE131928						GSE131928 pediatric						GSE102130						GSE119926						GSE70630						GSE89567						GSE119926 PDX						GSE150752 (mouse transgenic medulloblastoma )						GSE122871 (mouse transgenic GBM)
gene	p_val	avg_logFC	pct.1	pct.2	p_val_adj	gene	p_val	avg_logFC	pct.1	pct.2	p_val_adj	gene	p_val	avg_logFC	pct.1	pct.2	p_val_adj	gene	p_val	avg_logFC	pct.1	pct.2	p_val_adj	gene	p_val	avg_logFC	pct.1	pct.2	p_val_adj	gene	p_val	avg_logFC	pct.1	pct.2	p_val_adj	gene	p_val	avg_logFC	pct.1	pct.2	p_val_adj	gene	p_val	avg_logFC	pct.1	pct.2	p_val_adj	gene	p_val
LINC00643	2.83874e-55	1.83341	0.579	0.421	6.72384e-51	NEAT1	5.83061e-29	-1.07909	0.219	0.471	1.38104e-24	MEG3	1.18507e-171	2.53284	0.838	0.508	2.80696e-167	MIAT	8.40072e-161	2.74995	0.354	0.111	1.98979e-156	XIST	4.02e-88	-1.57041	0.12	0.468	9.52e-84	MEG3	2.9507e-60	0.870785	0.947	0.848	6.98903e-56	MALAT1	1.94993e-23	0.949535	1	0.998	4.6186e-19	Malat1	3.33e-260	0.551	0.983	0.933	5.28e-256	Malat1	2.293e-54
MIAT	9.73999e-49	1.16493	0.454	0.265	2.30701e-44	LINC00152	1.14118e-28	-0.788569	0.128	0.359	2.703e-24	LINC00643	3.82855e-73	1.19505	0.77	0.556	9.06831e-69	MEG3	1.13691e-122	1.44442	0.612	0.408	2.69289e-118	MIAT	3.2e-36	0.885674	0.74	0.551	7.57e-32	PAR-SN	1.10179e-42	0.721041	0.976	0.936	2.6097e-38	LOC643406	1.58586e-21	0.616462	1	0.997	3.75628e-17	Miat	6.22e-143	0.54	0.565	0.343	9.85e-139	Gm10076	2.51903e-28
NEAT1	2.28388e-46	-0.65659	0.561	0.756	5.40959e-42	FLJ42875	1.43705e-25	-1.02086	0.019	0.161	3.40379e-21	KCNIP4-IT1	1.13373e-68	1.67746	0.445	0.148	2.68534e-64	LINC00599	3.10985e-68	0.999016	0.38	0.206	7.36599e-64	LINC00643	2.54e-31	1.11869	0.674	0.528	6.02e-27	MGC21881	2.867e-40	0.826727	0.853	0.731	6.79077e-36	H3F3AP4	1.71994e-18	0.63624	0.947	0.902	4.07384e-14	Ptprs	0	0.644	0.826	0.567	0	Meg3	5.32217e-10
LOC400940	2.24511e-44	1.24745	0.264	0.106	5.31778e-40	LOC150622	3.03204e-23	0.911958	0.748	0.633	7.18169e-19	LOC643406	8.53055e-64	0.681351	0.995	0.992	2.02055e-59	LOC646278	8.57459e-68	1.97864	0.354	0.199	2.03098e-63	LOC100126784	1.18e-29	-1.02636	0.048	0.187	2.8e-25	LINC00599	1.19065e-35	1.47024	0.342	0.117	2.82017e-31	MIAT	3.87613e-10	1.12203	0.45	0.274	9.18099e-06	Rtn1	0	0.827	0.972	0.936	0	Neat1	8.44607e-09
LOC150568	1.05976e-39	0.965421	0.282	0.126	2.51015e-35	LOC150568	1.08588e-19	1.33771	0.343	0.172	2.57202e-15	LOC286437	2.72588e-46	0.610153	0.981	0.978	6.45651e-42	LINC00294	4.65677e-51	0.539133	0.913	0.889	1.103e-46	TTTY15	1.32e-25	0.833977	0.552	0.375	3.14e-21	TPTEP1	6.10225e-35	0.694964	0.713	0.497	1.44538e-30	LINC00478	1.5299e-09	0.829127	0.722	0.595	3.62372e-05	Stmn2	0	0.888	0.913	0.757	0	Gria2	5.46287e-124
LINC00599	6.07208e-35	1.3827	0.146	0.038	1.43823e-30	LINC00643	9.22315e-18	0.96666	0.752	0.673	2.18459e-13	XIST	1.22012e-40	0.77978	0.808	0.765	2.88998e-36	FTX	1.08833e-35	0.728411	0.629	0.559	2.57781e-31	FLJ46906	1.96e-24	-1.51878	0.078	0.218	4.63e-20	LOC150568	2.16515e-34	0.95163	0.448	0.209	5.12838e-30	LINC00461	1.97949e-08	0.950119	0.541	0.388	0.000468862	Gap43	0	0.89	0.911	0.694	0	Gap43	1.54082e-70
LOC150622	3.63151e-33	0.97501	0.633	0.531	8.6016e-29	LOC100132707	2.49066e-17	-0.675024	0.048	0.176	5.89938e-13	LOC654433	1.46378e-39	-0.606885	0.388	0.593	3.46711e-35	LOC283683	4.10156e-33	1.4395	0.527	0.449	9.71496e-29	LINC00599	7.73e-24	0.806852	0.383	0.183	1.83e-19	LOC100126784	5.10062e-28	-0.61281	0.08	0.211	1.20813e-23	LOC284578	4.14206e-08	-0.677621	0.128	0.279	0.000981089	Gria2	1.19e-273	0.709	0.69	0.383	1.88e-269	Map2	6.15134e-69
LINC00673	6.07644e-27	0.75725	0.527	0.395	1.43927e-22	XIST	3.95523e-13	0.676538	0.655	0.527	9.36837e-09	LOC541471	4.62827e-37	-1.75886	0.023	0.157	1.09625e-32	LOC727924	2.79349e-22	0.863477	0.055	0.015	6.61666e-18	LOC100216545	6.78e-20	-0.935071	0.425	0.589	1.61e-15	LOC100505875	2.80668e-27	-1.68347	0.017	0.092	6.64791e-23	LINC00516	3.96551e-07	0.84309	0.55	0.448	0.00939271	Map2	3.67e-272	0.686	0.614	0.298	5.81e-268	Gria3	1.66059e-64
FGF14-IT1	3.08475e-25	0.64204	0.216	0.104	7.30654e-21	MIAT	3.14088e-12	0.616329	0.587	0.474	7.43948e-08	LOC146481	2.09184e-36	-2.17334	0.01	0.125	4.95472e-32	CT60	6.57664e-22	1.2197	0.056	0.016	1.55774e-17	BCYRN1	4.15e-18	-0.852951	0.668	0.8	9.83e-14	MIAT	1.73117e-26	1.0835	0.471	0.282	4.10045e-22	LOC101101776	3.96551e-07	0.84309	0.55	0.448	0.00939271	Tubb3	1.38e-267	0.903	0.905	0.818	2.19e-263	Ptprs	6.56606e-41
LOC100130370	4.19574e-22	0.778185	0.061	0.007	9.93804e-18	LOC400940	3.45632e-12	0.692843	0.352	0.215	8.18664e-08	LOC100216479	1.54209e-35	0.759891	0.666	0.497	3.65259e-31	DKFZP434L187	7.35303e-22	0.854846	0.569	0.51	1.74164e-17	FAM66B	9.91e-16	0.680556	0.224	0.092	2.35e-11	TTTY15	7.71552e-19	0.523188	0.613	0.456	1.8275e-14	PTPRS	1.26285e-33	1.09352	0.975	0.964	2.99118e-29	Tubb2b	1.2e-262	0.78	0.971	0.945	1.9e-258	Rps26	8.71046e-40
TTTY15	2.38802e-20	0.557276	0.5	0.398	5.65627e-16	LINC00294	3.95096e-12	0.565002	0.976	0.959	9.35824e-08	LOC100127888	8.60922e-34	-1.08272	0.024	0.151	2.03918e-29	UG0898H09	1.44529e-21	0.645254	0.604	0.554	3.42331e-17	SMA5	1.45e-15	0.521025	0.739	0.645	3.43e-11	LOC100506123	5.14621e-18	0.724106	0.786	0.703	1.21893e-13	RPS7	6.81558e-29	-0.624505	0.966	0.993	1.61434e-24	Igfbpl1	1.19e-249	0.564	0.958	0.916	1.89e-245	H2afz	5.14458e-36
MIR155HG	9.50099e-18	-1.04885	0.058	0.127	2.2504e-13	KCNIP4-IT1	1.4646e-11	0.626855	0.304	0.181	3.46905e-07	LOC100507217	3.92088e-33	0.899213	0.731	0.642	9.28699e-29	FLJ13197	5.93253e-20	0.556166	0.523	0.463	1.40518e-15	SNHG9	2.51e-14	-0.899906	0.154	0.28	5.93e-10	FGF14-IT1	3.52562e-12	0.596292	0.458	0.332	8.35079e-08	SLC38A5	4.72501e-28	-0.919551	0.362	0.714	1.11916e-23	Neurod1	6.45e-240	1.059	0.699	0.463	1.02e-235	Lrrtm2	1.98407e-34
LOC284998	2.18534e-14	0.680525	0.169	0.094	5.17621e-10	MIR22HG	4.04063e-11	-0.581727	0.061	0.159	9.57063e-07	PAR-SN	2.75334e-27	1.07971	0.791	0.687	6.52155e-23	LOC400927	4.03017e-19	1.05998	0.214	0.143	9.54587e-15	LOC440434	3.03e-13	0.524696	0.615	0.466	7.18e-09	LOC441204	1.34512e-11	0.523401	0.465	0.331	3.18605e-07	CADM1	5.50615e-26	1.28503	0.9	0.783	1.30419e-21	Ckb	1.57e-237	0.606	0.981	0.967	2.48e-233	Rps14	9.50603e-32
MGC2889	1.38826e-13	1.05153	0.192	0.116	3.28824e-09	FLJ46906	1.22335e-10	-0.771346	0.089	0.198	2.89763e-06	LINC00152	1.39198e-21	-1.02218	0.023	0.112	3.29705e-17	LOC339535	4.69012e-19	-0.917863	0.007	0.041	1.1109e-14	LOC375295	1.46e-11	-1.03641	0.023	0.08	3.46e-07	LINC00643	1.44163e-11	0.832573	0.586	0.512	3.41464e-07	2021-03-06	8.50673e-26	0.735043	0.984	0.979	2.0149e-21	Cntn2	1.06e-231	0.765	0.502	0.205	1.68e-227	Cadm1	1.38073e-30
LOC158434	1.90198e-13	-0.709862	0.015	0.051	4.50503e-09	LOC283683	6.89361e-10	0.685486	0.542	0.443	1.63282e-05	MIAT	2.36607e-21	0.678785	0.561	0.412	5.60427e-17	FLJ41350	1.45871e-18	1.84139	0.047	0.013	3.45511e-14	LOC100505835	8.76e-10	-0.747389	0.024	0.076	2.07e-05	ZNF883	4.40501e-08	0.536537	0.584	0.494	0.00104337	RPL23A	4.52918e-25	-0.514863	0.991	0.998	1.07278e-20	Tuba1a	6.37e-231	0.607	0.999	0.998	1.01e-226	mt-Co3	1.16908e-28
LINC00672	7.98413e-13	0.631113	0.801	0.784	1.89112e-08	FLJ13197	3.36706e-08	0.617763	0.679	0.638	0.000797522	PAR5	6.54287e-18	0.95386	0.395	0.255	1.54974e-13	AGPAT4-IT1	8.87471e-18	0.972874	0.155	0.091	2.10206e-13	LOC100499405	1.11e-09	0.52303	0.16	0.073	2.63e-05	SEPT5-GP1BB	8.41036e-08	0.506668	0.227	0.144	0.00199208	NFIB	1.17516e-23	1.02027	0.969	0.966	2.78348e-19	Stmn4	6.56e-231	0.845	0.671	0.4	1.04e-226	Dnm3	3.22543e-27
MEG3	9.537e-13	0.825981	0.633	0.582	2.25893e-08	LINC00599	1.10312e-07	1.1978	0.204	0.116	0.00261285	LOC441204	2.63542e-17	0.754268	0.204	0.086	6.24224e-13	LOC339822	2.44553e-16	0.771127	0.057	0.021	5.79247e-12	LOC100272216	2.57e-09	0.674442	0.359	0.252	6.09e-05	FLJ46906	9.74531e-08	-0.701926	0.031	0.071	0.00230827	RPS18	2.2892e-23	-0.555283	0.984	1	5.4222e-19	Nfix	1.09e-227	0.542	0.95	0.889	1.72e-223	Rpl41	4.35457e-25
LINC00645	1.17323e-10	-1.14545	0.035	0.076	2.7789e-06	MAP2	1.8966e-77	1.03158	0.985	0.951	4.49228e-73	MGC2889	2.47356e-16	1.06256	0.295	0.174	5.85887e-12	LINC00311	5.01492e-16	0.601842	0.478	0.428	1.18783e-11	LOC646719	3.61e-09	0.813048	0.776	0.767	8.54e-05	LOC100144595	2.62187e-07	0.565671	0.519	0.457	0.00621016	RPL12	2.33267e-23	-0.63202	0.981	0.993	5.52517e-19	Elavl3	6.55e-225	0.566	0.884	0.75	1.04e-220	mt-Co1	1.12935e-24
ZNF674-AS1	1.44667e-10	-0.66989	0.35	0.428	3.42659e-06	TNR	1.46275e-66	1.87087	0.599	0.229	3.46467e-62	LOC644172	1.03506e-15	0.731837	0.101	0.024	2.45164e-11	LOC100507346	1.11558e-15	0.801376	0.156	0.098	2.64236e-11	RNU12	8.96e-09	-0.60954	0.052	0.116	0.000212134	LOC284998	3.80189e-07	0.605379	0.123	0.06	0.00900517	GRIK2	5.35794e-23	1.68386	0.522	0.248	1.26908e-18	Sox11	3.1e-220	0.56	0.937	0.873	4.91e-216	Slc25a5	1.78165e-24
LOC375295	9.63193e-10	0.688841	0.209	0.144	2.28142e-05	FXYD6	6.40469e-66	0.991063	0.963	0.74	1.51701e-61	LOC100128398	1.0028e-13	0.638371	0.629	0.554	2.37522e-09	LINC00675	9.07711e-15	1.7721	0.037	0.01	2.15e-10	PAR5	2.43e-08	0.703542	0.355	0.256	0.000575656	SEZ6L	7.52837e-120	1.33863	0.94	0.731	1.78317e-115	KCNQ1OT1	9.61657e-23	0.559238	1	1	2.27778e-18	Ina	7.69e-212	0.597	0.623	0.352	1.22e-207	Ran	1.85293e-24
LOC100289230	1.30421e-09	-0.50538	0.112	0.174	3.08915e-05	TUBB2B	8.41921e-58	0.72472	0.991	0.943	1.99417e-53	ILF3-AS1	3.45647e-13	0.651235	0.823	0.791	8.18699e-09	SMA5	1.82433e-14	0.68966	0.656	0.634	4.32111e-10	NCRNA00185	2.91e-08	0.809731	0.136	0.062	0.000688724	INA	1.549e-107	1.74568	0.669	0.245	3.66895e-103	MAP1B	1.91136e-22	0.844445	1	0.99	4.52726e-18	Rab3a	4.26e-210	0.758	0.591	0.321	6.74e-206	Rps9	8.91189e-24
LOC100270746	2.37712e-09	-0.514678	0.034	0.072	5.63045e-05	GPM6A	1.70932e-54	0.69591	0.981	0.963	4.0487e-50	MGC21881	5.41826e-13	0.836595	0.584	0.492	1.28337e-08	LOC100130298	8.72097e-12	0.832499	0.099	0.058	2.06565e-07	MIR22HG	8.18e-08	-0.916148	0.027	0.074	0.00193844	GRIK2	6.50597e-92	1.16574	0.927	0.746	1.541e-87	LOC100131257	2.08781e-22	0.508992	1	1	4.94518e-18	Itm2b	3.48e-202	0.645	0.914	0.857	5.52e-198	mt-Rnr2	1.79761e-23
LOC441204	1.01198e-08	0.577557	0.273	0.207	0.000239697	CLIC1	2.50952e-51	-1.00572	0.207	0.568	5.94404e-47	LINC00282	6.77555e-12	0.849617	0.072	0.016	1.60486e-07	D21S2088E	2.46434e-10	1.36957	0.069	0.037	5.83704e-06	TTTY14	1.81e-07	0.991362	0.102	0.041	0.00428238	NRCAM	1.73292e-86	0.95571	0.985	0.936	4.10459e-82	PAX6	5.28408e-22	1.20628	0.522	0.224	1.25159e-17	Mllt11	4.88e-185	0.618	0.686	0.472	7.74e-181	Rplp0	1.15689e-22
LOC644656	4.52021e-08	-0.845496	0.103	0.155	0.00107066	GFRA2	9.62389e-51	-2.53995	0.03	0.294	2.27951e-46	ZNF883	1.38763e-11	0.759229	0.443	0.34	3.28675e-07	LOC100131564	1.34295e-09	0.53908	0.746	0.722	3.18091e-05	LOC100505875	2.03e-07	-1.18943	0.011	0.043	0.00481015	TNR	1.48396e-82	0.824793	0.965	0.833	3.51491e-78	FABP7	6.38803e-22	2.24445	0.312	0.072	1.51307e-17	Gpm6a	2.26e-184	0.755	0.636	0.413	3.58e-180	Rpl8	2.49222e-22
LOC100507346	9.13005e-08	-0.85459	0.068	0.11	0.00216254	2021-03-06	1.84131e-50	0.980328	0.992	0.994	4.36133e-46	FLJ13197	5.5839e-11	0.54539	0.535	0.465	1.3226e-06	LOC100128398	1.35987e-09	0.541145	0.567	0.546	3.22098e-05	GRIA2	6.12e-114	1.02354	0.983	0.822	1.45e-109	GABBR1	3.8193e-76	0.725084	0.972	0.884	9.04639e-72	ZIC1	9.38679e-22	1.07327	0.709	0.41	2.22336e-17	Nrxn1	8.5e-177	0.651	0.59	0.346	1.35e-172	Cenpa	5.46552e-21
AGPAT4-IT1	1.29616e-07	0.502073	0.225	0.168	0.00307009	LPAR1	4.00063e-49	-1.88487	0.04	0.305	9.47589e-45	SFTA1P	8.71768e-11	-1.18604	0.002	0.033	2.06487e-06	LOC100128239	1.57546e-09	0.770034	0.07	0.039	3.73164e-05	GRIK2	9.08e-106	1.14624	0.951	0.762	2.15e-101	PTPRS	7.57239e-74	0.700817	0.998	0.989	1.7936e-69	FTH1	1.13913e-21	0.552785	0.994	0.991	2.69814e-17	Podxl2	3.95e-176	0.621	0.787	0.63	6.25e-172	Rps2	1.39128e-19
GRIA2	1.53151e-251	1.80269	0.836	0.436	3.62755e-247	HLA-B	7.07308e-49	-1.06874	0.515	0.783	1.67533e-44	LOC100507373	1.05061e-10	0.518994	0.355	0.258	2.48847e-06	LOC100506343	1.68119e-08	0.924656	0.067	0.038	0.000398208	PDGFRA	1.74e-97	1.20884	0.934	0.705	4.12e-93	FAM110B	3.10362e-72	0.749325	0.975	0.915	7.35123e-68	ORC4	1.21372e-21	0.704509	1	1	2.87481e-17	Nhlh2	2.1e-175	0.637	0.705	0.513	3.32e-171	Ppia	1.7122e-19
MAP2	2.58602e-204	1.15746	0.981	0.865	6.12524e-200	SERPINH1	9.71413e-49	-0.731819	0.23	0.583	2.30089e-44	KGFLP2	3.61382e-10	0.570049	0.386	0.295	8.5597e-06	MAPT-IT1	4.81327e-08	0.603247	0.064	0.036	0.00114007	PTPRS	1.11e-95	0.796663	0.998	0.985	2.62e-91	UNC79	6.44189e-71	0.849848	0.806	0.518	1.52583e-66	MARCKS	1.91652e-21	0.831396	0.966	0.971	4.53948e-17	Tex14	2.62e-167	0.654	0.484	0.233	4.15e-163	Hint1	2.60137e-19
MYT1	5.5749e-156	1.6012	0.525	0.162	1.32047e-151	SOX11	1.18877e-48	0.982502	0.981	0.76	2.81571e-44	LOC100128822	6.05787e-10	1.45024	0.109	0.045	1.43487e-05	LOC100272216	1.63395e-07	0.750972	0.51	0.496	0.00387018	APOE	8.39e-95	-1.74905	0.177	0.565	1.99e-90	GNG5	2.2944e-70	-1.112	0.353	0.66	5.43451e-66	ABCC9	1.9315e-21	0.575271	1	0.997	4.57494e-17	Hmgb2	4.65e-166	-0.586	0.7	0.881	7.37e-162	Rpl32	4.56494e-19
PTPRS	3.84576e-138	0.897888	0.991	0.945	9.10907e-134	GRIA2	2.7993e-48	1.26329	0.819	0.726	6.63043e-44	LOC100128239	6.33652e-10	0.867474	0.136	0.065	1.50087e-05	LOC100499489	2.10175e-07	0.650986	0.141	0.103	0.00497821	SCD5	1.14e-91	0.760115	1	0.999	2.7e-87	ST8SIA3	2.12028e-68	1.19217	0.664	0.344	5.0221e-64	LOC646214	3.49445e-21	0.650626	0.997	0.998	8.27696e-17	Celf4	3.91e-164	0.685	0.6	0.374	6.19e-160	Tuba1b	5.06142e-19
GPM6A	7.25761e-128	0.803757	0.975	0.898	1.71904e-123	SEMA5A	9.05837e-48	0.948945	0.913	0.754	2.14557e-43	EPN2-IT1	1.20416e-09	0.997336	0.13	0.063	2.85218e-05	LOC100129617	2.57818e-07	1.00718	0.06	0.035	0.00610668	CRYAB	3.62e-86	-2.03268	0.242	0.606	8.57e-82	NRXN1	5.30833e-68	0.855664	0.947	0.839	1.25733e-63	MAP2	3.82941e-21	1.17608	0.816	0.621	9.07035e-17	Nhlh1	1.44e-160	0.605	0.507	0.269	2.28e-156	Hmgb2	1.40262e-18
NCAN	7.88614e-128	0.950162	0.578	0.242	1.86791e-123	MTSS1	1.69467e-47	0.972751	0.876	0.685	4.014e-43	LINC00654	1.98354e-09	0.51592	0.131	0.062	4.69822e-05	LINC00574	3.07471e-07	0.584477	0.442	0.424	0.00728276	CLU	4.18e-84	-1.74515	0.728	0.901	9.89e-80	HMP19	4.49416e-66	1.11072	0.783	0.515	1.06449e-61	ENO1	9.26944e-21	-0.514467	0.906	0.981	2.19556e-16	Map1b	5.01e-155	0.566	0.877	0.781	7.94e-151	Nlgn1	2.9644e-18
PLP2	1.32856e-126	-1.71827	0.193	0.502	3.14682e-122	SCD5	8.77365e-47	0.894409	1	0.994	2.07813e-42	ZNF718	2.51103e-09	0.51878	0.162	0.263	5.94763e-05	GRIA2	3.70638e-280	1.14965	0.726	0.354	8.77894e-276	PHLDA1	1.85e-82	1.09786	0.969	0.878	4.39e-78	GRIA2	3.13712e-61	0.603928	0.997	0.955	7.43059e-57	IGFBPL1	1.16885e-20	1.12116	0.872	0.771	2.76854e-16	Hpca	4.43e-151	-0.536	0.453	0.719	7.01e-147	Il1rap	3.72554e-18
LGALS3	1.04867e-120	-1.42305	0.353	0.685	2.48387e-116	PHACTR3	1.17651e-46	1.39863	0.585	0.263	2.78669e-42	LOC646719	3.14118e-09	0.631422	0.71	0.665	7.44019e-05	RTN1	7.26922e-278	1.57453	0.816	0.5	1.72179e-273	SORL1	1.18e-81	-1.30201	0.23	0.602	2.78e-77	CADM1	2.78773e-59	0.943188	0.836	0.608	6.60301e-55	OPHN1	1.2447e-20	0.659297	1	0.997	2.94819e-16	Tubb2a	1.97e-148	0.731	0.57	0.364	3.12e-144	Arhgef2	6.3394e-18
VIM	6.00916e-115	-0.687286	0.644	0.888	1.42333e-110	HAPLN1	4.13472e-46	-2.01468	0.068	0.336	9.79351e-42	KGFLP1	3.58085e-09	0.815274	0.445	0.367	8.4816e-05	STMN4	2.11091e-264	2.76502	0.36	0.05	4.99989e-260	BBOX1	7.04e-79	-1.72839	0.085	0.396	1.67e-74	CHGB	8.16621e-59	1.00252	0.726	0.456	1.93425e-54	UGDH-AS1	1.35614e-20	0.685513	1	1	3.21215e-16	Dcx	8.52e-148	0.542	0.597	0.386	1.35e-143	Rplp1	7.55165e-18
GRIA3	2.32805e-113	1.21984	0.771	0.528	5.51423e-109	HLA-C	1.62212e-45	-0.804775	0.59	0.824	3.84216e-41	NEAT1	5.10187e-08	-1.87751	0.205	0.267	0.00120843	PTPRS	4.7644e-241	0.918634	0.983	0.928	1.1285e-236	DKK3	7.22e-78	-1.91438	0.14	0.467	1.71e-73	GRIA4	3.94282e-56	0.901026	0.928	0.842	9.33896e-52	CNR1	1.36726e-20	1.15972	0.412	0.148	3.23848e-16	Plppr1	2.44e-147	0.552	0.413	0.184	3.86e-143	mt-Atp6	1.03807e-17
GRIA4	2.00039e-111	1.4173	0.681	0.429	4.73813e-107	IQGAP1	3.13687e-45	-0.929328	0.314	0.633	7.42998e-41	LOC338799	7.27272e-08	0.815253	0.262	0.184	0.00172262	GPM6A	7.86287e-231	0.998704	0.943	0.762	1.8624e-226	TNK2	7.63e-77	0.942514	0.938	0.788	1.81e-72	RTN1	1.44842e-55	0.808209	0.896	0.749	3.43074e-51	NFIA	3.58774e-20	0.949492	0.881	0.74	8.49793e-16	Aplp1	7.49e-145	0.547	0.38	0.16	1.19e-140	Srsf3	7.96936e-17
NCAM1	5.83997e-109	0.794827	0.96	0.863	1.38326e-104	COL1A1	7.53614e-45	-4.52719	0.014	0.235	1.78501e-40	IPW	1.72291e-07	0.510766	0.372	0.287	0.00408087	GAP43	5.94496e-220	2.10313	0.556	0.239	1.40812e-215	ROBO1	1.24e-76	1.08252	0.82	0.441	2.94e-72	CSMD1	3.40288e-55	0.853134	0.7	0.414	8.06007e-51	RPL29	5.24114e-20	-0.553434	0.988	0.998	1.24142e-15	Prkcb	1.91e-136	0.538	0.568	0.362	3.03e-132	Cnbp	1.07275e-16
LHFPL3	3.50298e-107	1.83763	0.595	0.335	8.29716e-103	HMP19	1.74895e-44	1.98757	0.368	0.099	4.14257e-40	LINC00327	2.50097e-07	0.584155	0.464	0.409	0.00592381	MAP2	2.94087e-219	1.15697	0.886	0.66	6.96575e-215	LMF1	1.42e-76	0.784169	0.937	0.684	3.35e-72	GRIK3	2.0189e-53	0.842613	0.862	0.685	4.78198e-49	MYC	6.43784e-20	-1.13724	0.356	0.671	1.52487e-15	Elavl4	4.08e-133	0.558	0.583	0.387	6.46e-129	H3f3b	1.49641e-16
CNTN1	8.96227e-105	1.76932	0.509	0.227	2.1228e-100	VIM	2.55675e-44	-0.7674	0.563	0.805	6.05592e-40	FGF14-IT1	3.26985e-07	0.821297	0.218	0.146	0.00774497	SYT11	8.61546e-218	1.54208	0.793	0.569	2.04066e-213	EZR	1.62e-76	-1.75886	0.18	0.518	3.85e-72	SNAP25	1.06616e-52	1.17256	0.548	0.246	2.5253e-48	MGP	8.08822e-20	1.37369	0.456	0.178	1.91578e-15	Trpc4ap	1.21e-122	0.62	0.468	0.277	1.91e-118	Rps13	2.60997e-16
ATCAY	2.7837e-104	1.14046	0.966	0.951	6.59347e-100	CYSTM1	3.72233e-44	-1.08756	0.139	0.442	8.8167e-40	LINC00599	3.79893e-07	0.684565	0.036	0.007	0.00899814	TMEM59L	2.51136e-216	1.93797	0.398	0.095	5.94841e-212	EPAS1	2.1e-76	-1.86538	0.077	0.369	4.98e-72	VIM	5.97557e-51	-2.12609	0.175	0.394	1.41537e-46	SHISA9	8.38866e-20	0.661649	1	0.998	1.98694e-15	Syt11	2.33e-122	0.511	0.665	0.51	3.7e-118	Gm10073	5.47743e-16
SEZ6L	3.28416e-104	1.22491	0.727	0.486	7.77887e-100	LAMB2	1.43215e-43	-0.7472	0.255	0.589	3.39219e-39	OLIG1	9.39455e-185	1.82136	0.924	0.67	2.22519e-180	MAP1B	2.10695e-214	1.17383	0.982	0.958	4.99051e-210	LPPR1	1.67e-75	0.789722	0.922	0.658	3.94e-71	LRRTM2	1.06654e-50	0.779546	0.852	0.661	2.52621e-46	GDI1	8.53362e-20	1.0842	0.909	0.834	2.02127e-15	Itsn1	4.93e-117	0.528	0.45	0.25	7.8e-113	Rps16	1.1492e-15
FXYD6	1.78911e-101	0.737938	0.943	0.819	4.23769e-97	ADAMTS1	6.80162e-43	-1.68819	0.092	0.365	1.61103e-38	SEZ6L	1.5458e-154	2.02512	0.788	0.341	3.66138e-150	IGFBPL1	5.79755e-213	0.901033	0.947	0.815	1.37321e-208	DLL3	7.51e-75	1.18318	0.79	0.434	1.78e-70	ELAVL4	1.82586e-50	0.914242	0.786	0.564	4.32474e-46	ODF2L	2.97381e-19	0.617797	1	0.995	7.04378e-15	Gng3	1.51e-107	0.512	0.486	0.297	2.39e-103	Ranbp1	1.44887e-15
DSCAML1	2.60605e-100	0.955679	0.382	0.111	6.17269e-96	ALDOA	5.89102e-42	-0.883482	0.901	0.972	1.39535e-37	EGR1	1.2733e-140	1.58929	0.92	0.628	3.01595e-136	TUBB2B	3.90493e-197	0.77154	0.947	0.806	9.24921e-193	NLGN1	1.59e-72	1.13298	0.841	0.579	3.78e-68	GABRB3	3.88926e-49	0.985343	0.613	0.335	9.2121e-45	RPL35	3.19217e-19	-0.562379	0.928	0.972	7.56099e-15	S100a16	4.91e-79	0.514	0.406	0.246	7.78e-75	Rps5	2.69091e-15
GAPDH	6.21701e-99	-0.778426	0.998	1	1.47256e-94	MGP	1.81574e-41	-5.04396	0.01	0.214	4.30077e-37	PCDH15	1.26884e-138	1.57532	0.812	0.382	3.00538e-134	NME2	8.94176e-197	-0.765569	0.641	0.889	2.11795e-192	GPM6A	5.35e-72	0.545335	1	0.996	1.27e-67	NLGN1	6.20859e-49	0.695201	0.942	0.851	1.47057e-44	RGMB	3.38569e-19	1.28831	0.684	0.419	8.01934e-15	Ppp1r14c	1.29e-78	0.579	0.505	0.374	2.04e-74	Tubb5	2.76196e-15
S100A10	8.54998e-99	-1.05243	0.358	0.647	2.02515e-94	NKAIN4	2.59544e-41	0.874184	0.697	0.388	6.14755e-37	PDGFRA	1.92634e-129	2.76253	0.823	0.526	4.56274e-125	LDHA	1.81076e-196	-0.918361	0.581	0.859	4.28897e-192	MAP2	5.76e-71	0.837572	0.988	0.934	1.36e-66	DSCAML1	8.42816e-47	0.67475	0.875	0.701	1.99629e-42	TP53INP1	4.06207e-19	1.22264	0.619	0.369	9.62141e-15	2810417H13Rik	1.72e-131	-0.518	0.428	0.692	2.72e-127	Pbk	2.86764e-15
LPPR1	2.76654e-98	1.96043	0.385	0.121	6.55284e-94	PLSCR4	2.86153e-41	-2.46629	0.029	0.252	6.77782e-37	NLGN3	8.88282e-129	1.70496	0.879	0.586	2.10398e-124	CLIP3	7.04033e-187	1.05393	0.748	0.48	1.66757e-182	PCDHGB4	7.03e-71	-1.43107	0.13	0.454	1.66e-66	LUC7L3	1.85096e-46	0.50617	0.99	0.966	4.38419e-42	CLIP3	4.35285e-19	1.1347	0.675	0.447	1.03102e-14							Ina	3.13917e-15
TNR	3.89753e-98	1.60856	0.517	0.243	9.23169e-94	S100A10	3.32714e-41	-1.18847	0.15	0.445	7.88065e-37	CLIC1	1.91762e-120	-2.15586	0.104	0.497	4.54207e-116	ATCAY	7.94793e-187	1.29915	0.933	0.875	1.88255e-182	NLGN3	7.12e-71	0.88487	0.951	0.821	1.69e-66	SNTG1	3.83259e-46	0.885524	0.674	0.395	9.07787e-42	DDX21	5.46824e-19	-0.637667	0.55	0.81	1.29521e-14							Rbm3	5.71074e-15
SCRG1	8.65887e-96	0.938087	0.771	0.564	2.05094e-91	USP53	4.00193e-41	-1.51872	0.023	0.238	9.47896e-37	FOS	2.37617e-119	1.18992	0.917	0.549	5.62819e-115	OPHN1	3.49472e-182	0.59399	0.997	0.993	8.2776e-178	PTPRZ1	2.55e-70	0.646275	0.999	0.996	6.05e-66	RIMS2	5.10663e-46	0.845714	0.508	0.239	1.20956e-41	RPL14	5.64376e-19	-0.545008	0.975	0.997	1.33678e-14							Snrpb	7.73601e-15
CD44	1.02161e-94	-1.20373	0.131	0.382	2.41978e-90	COL5A1	7.00346e-41	-1.31071	0.08	0.329	1.65884e-36	MYT1	4.80384e-119	1.88051	0.706	0.32	1.13784e-114	NCAM1	1.82283e-177	1.02499	0.872	0.697	4.31754e-173	LHFPL3	8.66e-70	0.932874	0.897	0.686	2.05e-65	KLRC4	1.849e-45	1.4566	0.617	0.377	4.37954e-41	TMEM212	6.85279e-19	0.631298	0.997	0.991	1.62315e-14							Gm10282	8.19752e-15
ANXA1	2.50698e-94	-1.14011	0.185	0.459	5.93804e-90	PLCD1	7.31131e-41	-1.35686	0.092	0.354	1.73176e-36	GRIA4	5.78478e-114	1.33306	0.902	0.652	1.37018e-109	RPLP0	1.72661e-176	-0.768164	0.956	0.988	4.08965e-172	LRP1	1.34e-69	0.785344	0.976	0.906	3.18e-65	NLGN4X	9.25486e-45	1.05317	0.686	0.47	2.19211e-40	LPAL2	8.69551e-19	0.607754	0.944	0.886	2.05962e-14							Banf1	9.04107e-15
BEX1	2.83861e-94	0.954245	0.668	0.421	6.72354e-90	PTPRS	1.39046e-40	0.897166	1	0.992	3.29345e-36	SCG3	3.14747e-111	1.63915	0.871	0.596	7.4551e-107	NRXN1	7.91271e-175	1.33385	0.713	0.451	1.87421e-170	BCAN	1.6e-67	0.554096	0.997	0.996	3.79e-63	SEZ6L2	1.22177e-42	0.815263	0.581	0.312	2.89388e-38	HMGA1	1.13876e-18	-0.71103	0.631	0.819	2.69727e-14							Oaz1	9.71886e-15
NLGN3	7.81173e-93	0.937513	0.81	0.61	1.85029e-88	DNM3	2.81566e-40	1.33543	0.682	0.451	6.66917e-36	PTPRS	6.72184e-110	1.08731	0.983	0.947	1.59213e-105	STMN2	3.40252e-173	0.700481	0.866	0.643	8.05922e-169	SRPX	2.77e-67	-2.19119	0.042	0.281	6.56e-63	ASIC4	1.37468e-41	0.706373	0.878	0.726	3.25606e-37	ASS1	1.86678e-18	-1.15629	0.241	0.536	4.42165e-14							Grik5	1.92207e-14
NRXN1	1.17097e-91	1.05924	0.713	0.464	2.77355e-87	PCDHGB7	1.21222e-39	-1.06075	0.22	0.5	2.87126e-35	PTPRZ1	9.14953e-108	1.19012	0.988	0.923	2.16716e-103	GRIK2	1.93039e-169	1.66579	0.632	0.371	4.57232e-165	UGT8	1.01e-65	0.78737	0.995	0.971	2.39e-61	CELSR3	1.15053e-40	0.715497	0.706	0.501	2.72514e-36	XKR9	3.02264e-18	0.670392	0.941	0.874	7.15943e-14							Nrcam	2.41832e-14
CLASP2	2.92917e-90	0.969937	0.856	0.719	6.93803e-86	CRB1	2.07521e-39	1.4462	0.597	0.321	4.91534e-35	GRIA3	3.94696e-105	1.49834	0.728	0.346	9.34876e-101	KIF5C	5.02347e-168	1.45886	0.67	0.392	1.18986e-163	ALDOC	9.27e-65	-1.3098	0.408	0.706	2.2e-60	DPYSL3	5.8411e-40	0.703122	0.942	0.91	1.38352e-35	STMN2	3.93885e-18	1.02004	0.803	0.647	9.32955e-14							Wdr89	3.59191e-14
SCN3A	1.6194e-89	1.05624	0.59	0.317	3.83571e-85	EPAS1	2.16204e-39	-1.51541	0.061	0.299	5.121e-35	PDE4B	6.702e-105	1.63705	0.828	0.569	1.58744e-100	PDLIM3	3.67859e-167	1.55236	0.334	0.082	8.71311e-163	KLRC2	3.73e-64	0.77856	0.696	0.302	8.84e-60	GLRB	1.84874e-39	1.00572	0.61	0.378	4.37892e-35	MAB21L3	6.52015e-18	0.681224	0.978	0.964	1.54436e-13							Anp32b	3.79103e-14
DCX	1.6502e-88	1.30867	0.724	0.514	3.90867e-84	LAMA2	2.28916e-39	-1.12797	0.034	0.254	5.4221e-35	NRXN1	2.9053e-103	1.08184	0.806	0.435	6.88149e-99	GRIA4	2.31529e-163	2.37424	0.273	0.053	5.48399e-159	SPOCK1	1.33e-63	-1.2739	0.224	0.542	3.16e-59	ATF7IP	1.33052e-38	0.523736	0.975	0.93	3.15147e-34	ZIC4	9.43961e-18	1.62551	0.534	0.272	2.23587e-13							Gabrb3	4.236e-14
SERPINH1	2.18898e-88	-0.849868	0.321	0.61	5.18483e-84	DSCAML1	5.74056e-39	1.1726	0.382	0.123	1.35971e-34	OLIG2	2.76835e-99	1.41098	0.741	0.399	6.55711e-95	TUBA1A	5.92864e-163	0.689065	0.996	0.991	1.40426e-158	LIMA1	3.9e-63	0.863813	0.794	0.464	9.23e-59	SLC38A1	1.47572e-38	0.716295	0.707	0.47	3.4954e-34	SYT11	1.37137e-17	1.03951	0.716	0.495	3.24823e-13							Cks1b	8.19575e-14
LRRTM2	2.28847e-88	1.16811	0.719	0.512	5.42046e-84	NCAM1	9.19292e-39	0.693038	0.956	0.83	2.17744e-34	GRIA2	1.43283e-98	1.47299	0.866	0.648	3.3938e-94	RPLP1	2.22406e-157	-0.724708	0.949	0.986	5.26791e-153	PCDH9	1.88e-61	0.705933	0.775	0.41	4.45e-57	DCX	1.50951e-38	0.644218	0.911	0.754	3.57543e-34	ARHGEF26-AS1	1.42252e-17	0.56954	0.981	0.964	3.36938e-13							Rpl18a	1.86487e-13
ANXA2	1.38855e-87	-0.838737	0.346	0.625	3.28892e-83	MT1E	1.75858e-38	-2.56423	0.052	0.285	4.16537e-34	TNR	5.21522e-96	1.19528	0.908	0.652	1.23528e-91	HSPB1	2.53596e-156	-0.837742	0.433	0.751	6.00667e-152	KLRC3	2.8e-60	0.723774	0.703	0.326	6.63e-56	HIP1R	1.68732e-38	0.59709	0.911	0.763	3.99658e-34	BOC	2.05852e-17	1.24642	0.5	0.248	4.87581e-13							Nop10	1.92513e-13
GRIK2	2.73644e-87	0.995036	0.699	0.466	6.48153e-83	CFH	3.37292e-38	-2.55804	0.035	0.245	7.98911e-34	UNC80	9.6128e-96	1.40517	0.814	0.536	2.27689e-91	GNG3	1.68251e-154	2.7386	0.288	0.068	3.98518e-150	TACR1	3.74e-60	-1.44252	0.064	0.31	8.87e-56	RPH3A	3.88802e-38	1.78385	0.267	0.056	9.20917e-34	ASTN2	3.20045e-17	0.61467	1	1	7.58059e-13							Rps3	2.35754e-13
MTSS1	3.36995e-86	1.16241	0.703	0.479	7.98207e-82	C2orf40	3.84072e-38	-2.43618	0.037	0.254	9.09713e-34	TMEM63A	2.43393e-95	-1.54733	0.084	0.419	5.76501e-91	TSPAN7	1.7697e-153	1.43358	0.533	0.262	4.19171e-149	FTH1	3.33e-59	-0.756925	0.984	0.994	7.88e-55	IGSF21	1.45209e-37	0.955977	0.567	0.331	3.43941e-33	NOP16	3.45029e-17	-0.922396	0.397	0.657	8.17235e-13							mt-Cytb	4.15558e-13
SCG3	5.62577e-86	0.91816	0.817	0.624	1.33252e-81	DPYSL3	5.11519e-38	0.915601	0.865	0.732	1.21158e-33	LRRC4C	1.03534e-93	1.64591	0.644	0.265	2.45232e-89	INA	1.25357e-145	1.79111	0.612	0.381	2.96921e-141	GRIA4	4.12e-59	1.02239	0.869	0.655	9.76e-55	CELF4	2.23449e-37	1.04691	0.379	0.146	5.29262e-33	GRIA2	6.03888e-17	1.85543	0.503	0.288	1.43037e-12							Ubb	4.25551e-13
SCD5	7.39303e-86	0.953532	0.996	0.988	1.75111e-81	SEZ6L	1.16361e-37	1.00424	0.77	0.526	2.75612e-33	LRRTM2	1.30304e-93	1.6517	0.69	0.355	3.08638e-89	DCC	5.56232e-145	1.31879	0.434	0.174	1.31749e-140	S100A16	5.32e-59	-1.41508	0.242	0.542	1.26e-54	CELF3	2.58932e-37	0.654421	0.538	0.303	6.13307e-33	BIRC5	6.43785e-17	-1.06468	0.203	0.493	1.52487e-12							Txn1	6.4277e-13
RPL41	1.02821e-85	-0.523705	0.993	0.998	2.43542e-81	GRIK3	1.3849e-37	1.2325	0.7	0.481	3.28028e-33	S100A11	1.3612e-93	-3.07746	0.075	0.393	3.22414e-89	TUBB3	1.45835e-144	0.956837	0.881	0.74	3.45426e-140	MYT1	5.96e-59	1.06695	0.75	0.464	1.41e-54	CCND2	2.39402e-36	0.638911	0.924	0.825	5.67047e-32	KIF5C	7.22996e-17	1.19677	0.484	0.234	1.71249e-12							Rps18	9.50794e-13
CADM2	3.41139e-83	1.26054	0.791	0.64	8.08021e-79	EMP3	1.75424e-37	-0.984663	0.162	0.443	4.1551e-33	SCD5	1.15386e-92	1.0437	0.992	0.989	2.73304e-88	TAGLN3	5.43357e-144	1.52897	0.496	0.237	1.28699e-139	CD24	2.13e-58	0.658708	0.943	0.831	5.05e-54	NPIP	2.94107e-36	0.547289	0.986	0.976	6.96621e-32	CRIP2	1.44125e-16	0.591263	0.666	0.39	3.41374e-12							Cdc20	1.1501e-12
PTPRZ1	8.63438e-83	0.739507	0.975	0.94	2.04514e-78	S100A6	3.47332e-37	-0.840612	0.387	0.661	8.22691e-33	HMP19	1.56441e-92	1.78076	0.56	0.183	3.70547e-88	NTRK3	2.88396e-143	1.37667	0.457	0.189	6.83096e-139	CHCHD2	2.17e-58	-0.785798	0.92	0.955	5.13e-54	ASIC1	3.41227e-36	0.704179	0.818	0.639	8.0823e-32	LOC650226	1.70199e-16	1.53751	0.366	0.138	4.03134e-12							Nrxn1	1.19263e-12
NLGN1	6.20696e-82	0.985241	0.76	0.551	1.47018e-77	COL6A1	3.77165e-37	-1.09559	0.389	0.681	8.93353e-33	ARC	2.55218e-91	1.90364	0.69	0.353	6.04508e-87	SEMA6A	7.39981e-143	2.08612	0.602	0.375	1.75272e-138	GAS2L1	3.72e-58	-0.924378	0.139	0.427	8.81e-54	EDNRB	7.58807e-36	-1.81273	0.166	0.358	1.79731e-31	EIF4EBP1	1.75057e-16	-0.52865	0.597	0.848	4.14641e-12							Rpl14	1.52828e-12
ASIC4	1.01614e-80	1.12942	0.527	0.276	2.40683e-76	ALDOC	5.20645e-37	-1.01466	0.114	0.38	1.2332e-32	EPN2	1.09947e-90	1.99323	0.842	0.663	2.60421e-86	NREP	8.34167e-141	0.83056	0.978	0.975	1.97581e-136	CA12	5.54e-58	-1.10469	0.149	0.441	1.31e-53	REC8	8.01118e-36	1.01363	0.802	0.678	1.89753e-31	NME2	2.07548e-16	-0.603234	0.903	0.967	4.91597e-12							mt-Nd1	1.69501e-12
THY1	1.76142e-80	1.18836	0.554	0.304	4.1721e-76	GRIK2	7.9317e-37	1.27015	0.51	0.253	1.8787e-32	EPHA3	5.48033e-90	-1.30265	0.128	0.474	1.29807e-85	ELAVL3	7.69081e-138	0.757459	0.529	0.264	1.82165e-133	ASIC1	7.06e-58	1.01356	0.737	0.412	1.67e-53	EGFR	1.31727e-35	0.532137	0.966	0.906	3.12009e-31	UGT8	2.14195e-16	0.748965	0.984	0.959	5.07342e-12							Ccnd2	2.56351e-12
LMF1	2.32898e-80	1.22014	0.796	0.579	5.51642e-76	PTPRZ1	1.02792e-36	0.679586	0.988	0.981	2.43473e-32	MAP2	1.49682e-87	0.91675	0.988	0.947	3.54537e-83	KIF5A	1.09274e-136	1.60708	0.411	0.167	2.58826e-132	ZCCHC24	1.14e-57	0.947677	0.778	0.494	2.69e-53	NMNAT2	2.03302e-35	0.875024	0.495	0.257	4.81542e-31	ITGBL1	3.0669e-16	1.28045	0.362	0.131	7.26425e-12							Prdx1	3.10583e-12
TUBB2B	3.55216e-80	0.668358	0.984	0.929	8.41364e-76	IFITM2	1.10197e-36	-1.37032	0.096	0.342	2.61012e-32	KLRC2	6.1428e-87	1.45863	0.655	0.284	1.45498e-82	RPL41	7.39365e-134	-0.651376	0.977	0.993	1.75126e-129	SPHKAP	1.27e-57	0.953907	0.649	0.299	3e-53	UNC80	2.31896e-35	0.592439	0.828	0.679	5.49269e-31	APP	3.38495e-16	1.22796	0.666	0.486	8.0176e-12							Nlgn3	3.10844e-12
CLIC1	7.00367e-79	-0.608345	0.371	0.641	1.65889e-74	COL5A2	1.75882e-36	-1.98124	0.052	0.268	4.16593e-32	CD99	7.29946e-87	-1.26263	0.325	0.694	1.72895e-82	CALM1	1.38836e-131	0.792003	0.977	0.973	3.28846e-127	DNM3	1.81e-57	1.11904	0.73	0.444	4.28e-53	SLC35E2	5.18022e-35	0.656838	0.956	0.916	1.22699e-30	ZNF521	3.58013e-16	0.822293	0.428	0.178	8.47989e-12							Cks2	3.49093e-12
OPHN1	4.97427e-78	0.507273	0.996	0.993	1.17821e-73	NNMT	2.18996e-36	-3.32506	0.023	0.217	5.18715e-32	NCAM1	2.85035e-85	0.744172	0.985	0.956	6.75134e-81	ZIC1	1.77418e-131	0.704756	0.85	0.626	4.20231e-127	RGMB	3.89e-57	1.03658	0.861	0.639	9.21e-53	PTCHD2	1.10727e-34	0.689503	0.66	0.434	2.62267e-30	FAT4	1.38721e-15	0.754623	0.391	0.167	3.28575e-11							Eif5a	3.7377e-12
TUBB4A	1.27171e-77	1.41412	0.446	0.202	3.01218e-73	C1S	2.28461e-36	-2.28099	0.085	0.316	5.41132e-32	INPP4B	5.54576e-83	-1.21004	0.06	0.349	1.31357e-78	RPS18	4.38033e-131	-0.810184	0.904	0.964	1.03752e-126	NCOR2	8.31e-57	0.876981	0.818	0.551	1.97e-52	SRGAP2C	2.47333e-34	0.792659	0.818	0.684	5.85833e-30	TSPAN7	1.59092e-15	1.08019	0.666	0.448	3.76825e-11							Arl6ip1	4.47557e-12
ST6GAL1	3.9836e-77	1.48477	0.326	0.102	9.43555e-73	FXYD5	2.30634e-36	-1.56641	0.05	0.271	5.4628e-32	NRCAM	2.60648e-82	1.45686	0.765	0.507	6.1737e-78	CHD7	6.84168e-131	0.747881	0.966	0.96	1.62052e-126	OLIG2	1.61e-56	0.697162	0.862	0.603	3.81e-52	CHGA	2.57891e-34	0.874772	0.434	0.199	6.1084e-30	ANXA2	1.91631e-15	-0.93628	0.3	0.576	4.53898e-11							mt-Nd4	4.54146e-12
TAGLN3	1.77956e-76	1.11734	0.492	0.248	4.21506e-72	MICALL2	3.13839e-36	-2.00873	0.11	0.352	7.4336e-32	MTSS1	1.04249e-81	1.21484	0.835	0.576	2.46924e-77	GDI1	1.67761e-130	0.897855	0.91	0.864	3.97358e-126	B2M	2.26e-56	-0.961688	0.951	0.975	5.35e-52	WLS	7.06884e-34	-0.842186	0.31	0.529	1.67432e-29	KNSTRN	2.35727e-15	-0.705281	0.284	0.562	5.58344e-11							Pabpc1	5.18351e-12
STMN4	3.33483e-73	1.04186	0.52	0.281	7.89887e-69	CTGF	6.24562e-36	-3.51443	0.037	0.245	1.47934e-31	NOVA1	1.09862e-80	1.03827	0.884	0.66	2.6022e-76	FXYD6	2.08712e-130	0.973373	0.657	0.413	4.94355e-126	PCDH15	9.1e-56	1.00722	0.842	0.618	2.16e-51	CACNG2	9.28826e-34	0.613998	0.433	0.201	2.20002e-29	EGLN3	2.59015e-15	-0.679098	0.141	0.397	6.13503e-11							Hmgn2	5.23246e-12
TSC22D1	5.06425e-73	0.663416	0.916	0.83	1.19952e-68	NFIB	8.36387e-36	0.917498	0.956	0.884	1.98107e-31	DSCAM	6.29911e-80	1.20865	0.724	0.393	1.49201e-75	MYC	3.56441e-130	-1.33918	0.29	0.573	8.44267e-126	SOX8	9.98e-56	0.655199	0.865	0.593	2.36e-51	LAMB2	9.68402e-34	-1.08423	0.132	0.306	2.29376e-29	HES6	2.63677e-15	-0.865057	0.372	0.636	6.24544e-11							Cox5a	5.84727e-12
TTC3	1.63848e-70	0.626999	0.973	0.937	3.88091e-66	MYT1	8.43811e-36	1.35057	0.667	0.441	1.99865e-31	SLC1A2	5.67437e-79	1.48801	0.71	0.455	1.34403e-74	SH2D3C	3.64832e-130	1.65316	0.301	0.088	8.6414e-126	EEPD1	1.03e-54	-1.22381	0.085	0.337	2.43e-50	LIMCH1	1.11362e-33	-1.61937	0.162	0.346	2.63771e-29	CA14	3.57118e-15	1.20955	0.312	0.103	8.45871e-11							Rpl10a	6.21698e-12
STMN2	4.51328e-70	1.244	0.314	0.102	1.06902e-65	COL21A1	8.52506e-36	-2.19984	0.019	0.208	2.01925e-31	FOSB	1.25465e-78	1.53918	0.716	0.372	2.97176e-74	RPL3	2.14106e-128	-0.615389	0.981	0.992	5.07132e-124	SLC39A11	1.33e-54	-1.57612	0.114	0.373	3.14e-50	SLC22A17	1.24288e-33	0.737989	0.917	0.845	2.94388e-29	ABHD14B	4.61858e-15	-0.724894	0.222	0.49	1.09396e-10							Rps6	6.25127e-12
NKAIN4	4.75697e-70	1.18493	0.42	0.188	1.12673e-65	BCAN	1.56117e-35	0.820124	0.852	0.726	3.69779e-31	PCDHGC3	4.47623e-78	1.32934	0.837	0.686	1.06024e-73	DCX	5.97955e-128	1.08448	0.707	0.487	1.41632e-123	GADD45B	6.26e-54	-2.04808	0.131	0.387	1.48e-49	CDHR1	3.70118e-33	0.78352	0.669	0.473	8.76661e-29	NLGN4X	5.36617e-15	1.66383	0.391	0.171	1.27103e-10							Rps4x	6.88882e-12
MLLT11	5.2029e-70	0.935849	0.772	0.642	1.23236e-65	IGF2	1.82629e-35	-1.65026	0.233	0.5	4.32576e-31	CA10	5.48869e-78	1.89707	0.663	0.36	1.30005e-73	SCG5	1.46698e-126	2.30106	0.3	0.092	3.47469e-122	STMN2	8.33e-54	0.977122	0.584	0.234	1.97e-49	KLRC3	6.25864e-33	0.533756	0.918	0.782	1.48242e-28	MICAL1	5.72398e-15	0.94976	0.594	0.36	1.35578e-10							mt-Co2	8.29827e-12
APOD	8.90167e-69	0.755043	0.41	0.179	2.10845e-64	AHNAK	2.54662e-35	-1.40734	0.072	0.299	6.03192e-31	GABBR1	7.61423e-78	1.3421	0.837	0.662	1.80351e-73	DPYSL2	2.59279e-126	1.03204	0.848	0.769	6.14129e-122	HNRNPA1	1.16e-53	0.537136	0.983	0.926	2.74e-49	PBXIP1	6.73927e-33	-1.45522	0.091	0.241	1.59626e-28	CDC20	6.06753e-15	-1.48294	0.162	0.416	1.43716e-10							Eif3i	1.17055e-11
PCDH15	3.16539e-68	1.69984	0.291	0.091	7.49754e-64	CSMD1	3.18418e-35	0.85247	0.549	0.288	7.54204e-31	EMP3	2.56569e-77	-1.81574	0.06	0.335	6.0771e-73	CLASP2	2.14247e-122	1.12759	0.839	0.757	5.07465e-118	PON2	1.23e-53	-1.08405	0.773	0.884	2.92e-49	APOE	9.87567e-33	-2.21724	0.099	0.245	2.33915e-28	LDHA	6.10832e-15	-0.756231	0.734	0.874	1.44682e-10							Basp1	1.19409e-11
SOX11	4.86349e-68	0.926768	0.884	0.782	1.15197e-63	EMP1	3.83545e-35	-1.75598	0.168	0.428	9.08464e-31	DPP6	6.44058e-77	1.02043	0.856	0.582	1.52552e-72	RPL8	4.05167e-121	-0.694202	0.946	0.971	9.59677e-117	CCND2	1.37e-53	0.735093	0.902	0.707	3.24e-49	NLGN3	1.18788e-32	0.759049	0.837	0.71	2.81362e-28	RTN1	6.17411e-15	1.23396	0.697	0.562	1.4624e-10							Serpine2	1.78446e-11
TPI1	1.0066e-67	-0.659436	0.927	0.962	2.38422e-63	TWIST1	3.88146e-35	-0.79815	0.04	0.244	9.19363e-31	SDC3	6.79407e-77	1.20797	0.819	0.589	1.60924e-72	PRLR	6.68642e-121	1.87947	0.255	0.064	1.58375e-116	SNX22	1.46e-53	0.7768	0.892	0.757	3.45e-49	RASAL2	1.43158e-32	0.75216	0.659	0.454	3.39083e-28	PCSK1N	6.67166e-15	1.69261	0.347	0.14	1.58025e-10							Itgav	2.69535e-11
DLL3	1.15318e-67	1.55899	0.498	0.264	2.73143e-63	CSRP2	5.39018e-35	-0.972681	0.223	0.5	1.27672e-30	GNG11	1.29983e-76	-2.35864	0.038	0.293	3.07879e-72	PAX6	1.47843e-120	1.42584	0.533	0.315	3.50181e-116	IGDCC4	4.73e-53	-1.1927	0.131	0.397	1.12e-48	LPPR1	2.17307e-32	0.521038	0.888	0.724	5.14712e-28	ZNF793	7.10629e-15	0.50258	0.978	0.948	1.6832e-10							Lrrc58	2.70969e-11
NUPR1	1.26314e-67	-1.29234	0.095	0.286	2.99188e-63	PSMB8	5.58774e-35	-0.755307	0.162	0.435	1.32351e-30	CNTN1	1.54338e-76	1.06333	0.904	0.716	3.65564e-72	TRIP10	2.44145e-118	-1.34796	0.104	0.338	5.78283e-114	HIP1R	5.29e-53	0.720731	0.919	0.768	1.25e-48	FIBIN	4.66407e-32	-0.811465	0.253	0.465	1.10473e-27	GLRB	8.31487e-15	1.77037	0.266	0.081	1.96946e-10							Sdc3	2.71278e-11
SYPL1	3.27884e-67	-0.631099	0.456	0.699	7.76626e-63	IGF2-AS	6.56111e-35	-1.35886	0.019	0.207	1.55406e-30	SMOC1	6.19797e-75	0.752686	0.865	0.562	1.46805e-70	SH3GL2	2.5535e-118	1.83913	0.368	0.149	6.04823e-114	LPHN3	5.39e-53	0.998231	0.713	0.396	1.28e-48	DNM3	4.75067e-32	0.541941	0.932	0.839	1.12524e-27	LDOC1	9.41067e-15	0.857268	0.456	0.217	2.22901e-10							2410006H16Rik	2.72595e-11
CLU	1.08685e-66	-0.518802	0.727	0.901	2.57432e-62	P4HA1	6.70499e-35	-1.17254	0.309	0.583	1.58814e-30	GSN	7.16049e-75	-1.44587	0.135	0.446	1.69603e-70	PLEKHA6	1.19268e-117	1.40203	0.306	0.101	2.82499e-113	CNTN1	7.71e-53	0.944686	0.756	0.466	1.83e-48	STMN2	4.88277e-32	1.36787	0.278	0.079	1.15653e-27	CPLX3	9.54115e-15	-0.626879	0.478	0.745	2.25992e-10							Rplp2	2.93555e-11
TAGLN2	1.75311e-66	-0.628026	0.551	0.782	4.15242e-62	ANXA5	1.19267e-34	-0.596796	0.627	0.845	2.82496e-30	KCNQ1OT1	3.05296e-74	0.766614	1	1	7.23124e-70	RPL35	1.70204e-117	-0.630945	0.788	0.9	4.03145e-113	SERINC5	8.28e-53	0.747601	0.871	0.678	1.96e-48	CTTNBP2	4.93077e-32	0.502959	0.947	0.868	1.1679e-27	SEZ6L	9.64823e-15	1.2832	0.784	0.634	2.28528e-10							Homer1	3.58865e-11
LGALS1	2.56824e-66	-0.624707	0.446	0.685	6.08313e-62	DDIT3	1.44925e-34	-1.22493	0.293	0.569	3.43269e-30	LUZP2	3.31672e-74	0.554609	0.893	0.638	7.85599e-70	ABLIM3	3.42882e-117	1.57949	0.252	0.064	8.1215e-113	MLC1	9.44e-53	-1.15014	0.208	0.496	2.24e-48	TNK2	4.99366e-32	0.554068	0.924	0.82	1.1828e-27	NCAPD2	1.57367e-14	-0.924616	0.281	0.543	3.72739e-10							Snrpd3	3.64785e-11
GABBR1	3.87209e-66	0.836617	0.732	0.546	9.17143e-62	MDK	3.75503e-34	-0.846894	0.641	0.836	8.89417e-30	ZNF462	1.18375e-73	1.12251	0.86	0.681	2.80383e-69	RPSA	5.51678e-117	-0.524072	0.959	0.989	1.3067e-112	CST3	3.2e-52	-1.67901	0.652	0.78	7.58e-48	GDAP1L1	1.27186e-31	0.591585	0.749	0.553	3.01253e-27	EEF1B2	1.60874e-14	-0.539166	0.934	0.995	3.81045e-10							Birc5	3.96046e-11
UGT8	5.64467e-66	1.07533	0.985	0.971	1.337e-61	FLNC	4.50071e-34	-2.90648	0.089	0.305	1.06604e-29	NTRK3	5.61703e-73	1.78959	0.588	0.28	1.33045e-68	APP	5.07102e-116	0.704135	0.8	0.597	1.20112e-111	SCARB2	1.76e-51	0.898022	0.947	0.92	4.17e-47	ZNF300P1	1.46852e-31	0.999184	0.394	0.177	3.47833e-27	ZBTB20	1.61645e-14	1.18289	0.619	0.417	3.82872e-10							Nlgn2	8.08487e-11
LSAMP	1.25268e-64	0.902528	0.763	0.612	2.96709e-60	COL3A1	5.29764e-34	-3.28409	0.01	0.181	1.2548e-29	NPC2	1.27836e-72	-0.917375	0.171	0.507	3.02793e-68	ELAVL4	2.21622e-115	1.88591	0.351	0.139	5.24934e-111	CXADR	5.55e-51	1.27829	0.889	0.804	1.32e-46	EEPD1	6.21228e-31	-1.25405	0.029	0.126	1.47144e-26	TUBB4B	1.69178e-14	-0.714379	0.744	0.89	4.00716e-10							Rps27l	8.19481e-11
BCAN	1.12465e-63	0.788828	0.827	0.749	2.66384e-59	C1R	6.88273e-34	-2.26191	0.1	0.329	1.63024e-29	IER2	3.22712e-72	1.11843	0.848	0.692	7.64376e-68	RUFY3	2.22272e-115	1.08977	0.818	0.747	5.26473e-111	MIR133A1	9.71e-51	-2.25656	0.02	0.187	2.3e-46	RUSC2	6.35488e-31	0.652228	0.747	0.569	1.50522e-26	TPI1	1.82232e-14	-0.968066	0.894	0.966	4.31636e-10							Eif3f	8.52075e-11
SOX6	1.47429e-63	1.21151	0.651	0.494	3.49201e-59	MFAP4	9.41172e-34	-3.36036	0.049	0.251	2.22926e-29	SHISA7	1.94601e-71	1.39778	0.635	0.337	4.60932e-67	RPL29	3.19089e-115	-0.614645	0.897	0.955	7.55795e-111	FIBIN	1.34e-50	-1.28562	0.127	0.384	3.17e-46	HES1	8.23623e-31	-0.614134	0.02	0.106	1.95083e-26	NFIX	2.17331e-14	1.17491	0.594	0.386	5.14769e-10							Rps19	8.87453e-11
PPFIA2	2.84728e-63	1.21266	0.342	0.135	6.74406e-59	ATCAY	1.13898e-33	0.898107	0.981	0.971	2.69779e-29	VIM	1.65211e-70	-1.45627	0.264	0.555	3.91319e-66	MICAL1	3.73555e-115	1.39255	0.424	0.198	8.84802e-111	LRRN1	1.59e-49	0.864702	0.885	0.678	3.77e-45	GRIA1	1.21811e-30	0.827407	0.354	0.144	2.88521e-26	OTX1	2.74369e-14	1.17683	0.394	0.174	6.49871e-10							Cacybp	1.03308e-10
CHD7	4.95349e-63	0.743478	0.874	0.782	1.17328e-58	MGST1	1.72754e-33	-2.42735	0.057	0.264	4.09186e-29	S100A10	5.06627e-70	-1.91682	0.261	0.573	1.2e-65	RPS17	1.24086e-114	-0.576591	0.869	0.944	2.93909e-110	RAB3IP	1.94e-49	0.729037	0.954	0.884	4.6e-45	ARG1	1.35571e-30	0.812885	0.285	0.094	3.21113e-26	NME1	3.57388e-14	-0.544928	0.812	0.959	8.46509e-10							Rpsa	1.1466e-10
CA10	5.25506e-63	2.14382	0.211	0.042	1.24471e-58	ITGA7	2.31995e-33	-0.790081	0.212	0.481	5.49503e-29	OPCML	1.89735e-69	1.20871	0.658	0.334	4.49406e-65	RPS27	4.71067e-113	-0.588479	0.918	0.976	1.11577e-108	RND3	4.17e-49	-1.19879	0.113	0.364	9.87e-45	SCN2A	2.50497e-30	0.818885	0.594	0.389	5.93326e-26	NPW	4.20233e-14	-0.741134	0.175	0.433	9.95364e-10							Mrps24	1.28238e-10
DNM3	4.03336e-62	0.957276	0.515	0.299	9.55341e-58	HLA-E	2.66387e-33	-0.548307	0.401	0.634	6.30964e-29	NLGN4X	6.09789e-69	1.32321	0.746	0.491	1.44435e-64	SLC1A7	2.95776e-111	-1.10355	0.083	0.305	7.00575e-107	CSPG4	4.21e-49	1.33948	0.661	0.38	9.98e-45	SPHKAP	3.8407e-30	0.839048	0.599	0.392	9.09707e-26	CHD7	4.75334e-14	0.591993	0.944	0.929	1.12588e-09							Ptma	1.36077e-10
OPCML	7.54894e-62	1.48581	0.28	0.089	1.78804e-57	CD44	3.02923e-33	-1.6374	0.096	0.322	7.17503e-29	GPM6A	1.38223e-68	0.690437	0.987	0.948	3.27395e-64	RPS12	4.98507e-110	-0.520434	0.89	0.963	1.18076e-105	PTN	4.23e-49	-1.03437	0.932	0.939	1e-44	ADAM22	5.67086e-30	0.729329	0.791	0.659	1.3432e-25	DTYMK	5.57954e-14	-0.534974	0.309	0.572	1.32157e-09							Rps27a	1.56376e-10
NRCAM	5.26134e-61	0.666788	0.896	0.796	1.2462e-56	C3orf70	6.84614e-33	0.974899	0.927	0.861	1.62158e-28	SHISA9	5.32286e-68	0.742035	0.997	0.997	1.26077e-63	HERC2P2	1.02618e-109	1.05911	0.873	0.826	2.43061e-105	PHLDB1	7.7e-49	0.940002	0.717	0.427	1.82e-44	NDRG4	6.58831e-30	0.73409	0.789	0.642	1.56051e-25	HEBP1	6.14918e-14	-0.864443	0.216	0.471	1.4565e-09							Rpl34	1.60939e-10
ALDOA	2.90717e-60	-0.517225	0.91	0.979	6.88592e-56	ABTB2	8.57683e-33	-0.79936	0.176	0.436	2.03151e-28	RARRES2	7.6569e-68	2.07358	0.288	0.031	1.81361e-63	PRDX6	2.20404e-109	-1.59476	0.412	0.679	5.2205e-105	FAM213A	1.33e-48	-1.25465	0.6	0.789	3.16e-44	USP9Y	2.1413e-29	0.716491	0.497	0.278	5.07189e-25	USH2A	6.60833e-14	-0.574513	0.094	0.324	1.56525e-09							Hmgn1	1.67796e-10
ELMO1	3.50817e-60	1.39979	0.45	0.248	8.30946e-56	GAPDH	1.09902e-32	-0.90264	0.999	1	2.60314e-28	ATCAY	7.93531e-68	1.06498	0.966	0.929	1.87956e-63	GPR56	1.34232e-108	1.34113	0.478	0.25	3.17942e-104	OLIG1	1.81e-48	0.540848	0.956	0.912	4.29e-44	ALDH1L1	2.15536e-29	-1.34113	0.036	0.138	5.10518e-25	SERINC1	9.17622e-14	1.02293	0.881	0.838	2.17348e-09							Ccnb2	1.68769e-10
SEC61G	6.30732e-60	-0.690589	0.821	0.935	1.49395e-55	SMAD3	1.44083e-32	-0.779696	0.099	0.335	3.41274e-28	RUNX2	7.48522e-67	-1.40326	0.023	0.236	1.77295e-62	CNR1	1.36717e-107	1.99579	0.444	0.234	3.23829e-103	SEZ6L	2.5e-48	0.656757	0.983	0.972	5.93e-44	TOX	2.97573e-29	0.603148	0.747	0.558	7.04831e-25	STMN4	1.03363e-13	1.47929	0.138	0.016	2.44824e-09							Ccnb1	1.77962e-10
CCDC88A	6.39974e-60	0.685684	0.907	0.822	1.51584e-55	FAP	2.33974e-32	-2.03972	0.009	0.173	5.54192e-28	KCND2	1.86751e-66	1.11847	0.665	0.348	4.42338e-62	RPL38	1.64231e-107	-0.616602	0.861	0.948	3.88998e-103	GLRB	2.91e-48	1.28037	0.533	0.235	6.9e-44	PON2	4.27457e-29	-0.814983	0.515	0.711	1.01247e-24	DNPH1	1.03603e-13	-0.667543	0.481	0.731	2.45393e-09							Fkbp3	2.30215e-10
SNRPB	8.50249e-60	-0.705221	0.742	0.877	2.0139e-55	CLU	2.48731e-32	-2.24095	0.469	0.694	5.89145e-28	SCN3A	4.05361e-66	1.18791	0.701	0.44	9.60139e-62	SPOCK2	4.2725e-106	1.36635	0.383	0.169	1.01198e-101	TNR	9.35e-48	0.782268	0.972	0.907	2.21e-43	S1PR1	5.6744e-29	-1.80069	0.029	0.122	1.34404e-24	DTNA	1.09661e-13	1.29704	0.5	0.291	2.59744e-09							Syt11	2.55714e-10
CSMD3	1.67932e-59	0.865431	0.217	0.051	3.97765e-55	DLC1	3.26657e-32	-0.592956	0.227	0.504	7.7372e-28	HEPN1	4.40537e-66	0.696799	0.679	0.362	1.04345e-61	2021-03-06	4.39568e-105	0.624193	0.986	0.985	1.04116e-100	FXYD7	1.3e-47	-1.26272	0.204	0.475	3.08e-43	AMER3	6.84415e-29	0.83911	0.392	0.201	1.6211e-24	CDKN2AIPNL	1.21629e-13	-0.592293	0.553	0.745	2.8809e-09							Rpl15	2.64414e-10
PHACTR3	2.00185e-59	0.757739	0.364	0.151	4.74157e-55	S100A16	3.43067e-32	-1.13859	0.185	0.446	8.12588e-28	NLGN1	5.19866e-66	1.29846	0.715	0.447	1.23135e-61	CAMK2N1	2.01922e-104	1.30756	0.36	0.15	4.78271e-100	FAM110B	2.57e-47	0.716998	0.928	0.771	6.09e-43	MT2A	1.05002e-28	-1.66725	0.316	0.498	2.48707e-24	INA	1.2181e-13	1.3266	0.641	0.478	2.88519e-09							Lsm4	2.77138e-10
MAGI2	4.75325e-59	0.816919	0.71	0.524	1.12585e-54	PPIC	3.67805e-32	-1.34215	0.041	0.236	8.71183e-28	CCND1	1.08351e-65	0.947826	0.826	0.577	2.56641e-61	ADCYAP1	7.27258e-104	1.48757	0.303	0.108	1.72258e-99	SPARCL1	3.89e-47	-0.953349	0.653	0.826	9.21e-43	FAM155A	1.24569e-28	0.714614	0.591	0.386	2.95055e-24	SEMA6A	1.51962e-13	1.31098	0.609	0.422	3.59937e-09							C1qbp	3.02707e-10
COL20A1	6.62435e-59	1.21601	0.32	0.125	1.56904e-54	TMBIM1	3.98379e-32	-1.38064	0.138	0.376	9.436e-28	DNAH2	1.36277e-65	0.847643	0.404	0.115	3.22785e-61	GNG5	1.01924e-102	-0.661257	0.388	0.651	2.41416e-98	CHD7	4.09e-47	0.626586	0.919	0.734	9.69e-43	NKD1	2.41974e-28	0.586767	0.837	0.708	5.7314e-24	H2AFZ	1.67205e-13	-0.574834	0.847	0.95	3.96043e-09							Glrb	3.08249e-10
HLA-E	7.86643e-59	-0.578131	0.435	0.637	1.86324e-54	ABCA8	5.29644e-32	-1.06177	0.029	0.213	1.25451e-27	JUN	2.23923e-65	1.21441	0.79	0.567	5.30383e-61	SOGA1	2.35627e-102	0.806437	0.796	0.686	5.58106e-98	PCDHGA10	1.1e-46	1.04461	0.578	0.266	2.61e-42	KDM5D	3.53574e-28	0.710606	0.541	0.332	8.37476e-24	TPX2	1.73922e-13	-0.841099	0.203	0.457	4.11951e-09							Eif1	3.09918e-10
ZNF462	9.19715e-59	0.723602	0.795	0.647	2.17844e-54	HSPB1	5.58981e-32	-1.85724	0.451	0.676	1.324e-27	PROM1	4.61628e-65	1.13132	0.639	0.307	1.09341e-60	SNHG5	5.45712e-102	-0.742671	0.453	0.7	1.29257e-97	ATCAY	1.48e-46	0.740483	0.998	0.995	3.5e-42	NRSN1	7.97783e-28	0.751236	0.54	0.335	1.88963e-23	DCX	1.75565e-13	0.888184	0.731	0.566	4.15843e-09							Rpl9-ps6	3.24864e-10
HMP19	1.01554e-58	1.47169	0.26	0.08	2.40542e-54	NIPSNAP3A	5.73826e-32	-0.72815	0.128	0.376	1.35916e-27	JUNB	6.06948e-65	0.898007	0.792	0.53	1.43762e-60	FAM198B	1.18327e-101	1.50275	0.199	0.042	2.80269e-97	ABCA1	1.6e-46	-1.17678	0.467	0.719	3.79e-42	EYA1	8.05656e-28	0.745817	0.491	0.275	1.90828e-23	TUBA1A	2.09311e-13	0.666052	0.991	0.997	4.95775e-09							Psmb1	3.51708e-10
MARCKSL1	2.96629e-58	0.682458	0.822	0.683	7.02596e-54	TTC3	7.90401e-32	0.715015	0.977	0.98	1.87214e-27	LOC100131257	8.64318e-65	0.580128	0.999	0.997	2.04722e-60	SYT7	1.729e-101	1.15491	0.388	0.185	4.09532e-97	SOX9	2.19e-46	-1.34163	0.253	0.517	5.2e-42	MXD4	9.07173e-28	0.566357	0.791	0.637	2.14873e-23	GNG2	2.13622e-13	1.08384	0.369	0.159	5.05985e-09							mt-Rnr1	3.58658e-10
CACNA1A	4.39745e-58	0.566447	0.304	0.116	1.04158e-53	IGFBP2	9.84468e-32	-1.01406	0.605	0.821	2.33181e-27	OMG	2.01094e-64	1.44177	0.58	0.276	4.76311e-60	FABP7	1.80171e-101	1.27995	0.251	0.073	4.26754e-97	ANLN	3.65e-46	-0.849566	0.081	0.303	8.65e-42	EMP1	1.06449e-27	-1.23807	0.02	0.101	2.52134e-23	CDK6	2.29938e-13	0.751895	0.759	0.59	5.44632e-09							Cnih1	3.84212e-10
KLRC2	8.38166e-58	1.41583	0.312	0.122	1.98528e-53	LOXL4	1.06841e-31	-2.23648	0.057	0.253	2.53064e-27	LAMB2	3.71561e-64	-1.19423	0.202	0.498	8.8008e-60	NFASC	4.62169e-101	1.29004	0.405	0.19	1.09469e-96	CPAMD8	9.83e-46	-1.14534	0.02	0.174	2.33e-41	ANKRD62P1-PARP4P3	1.20042e-27	0.861132	0.537	0.326	2.84333e-23	GNB3	2.56333e-13	-1.18115	0.331	0.572	6.07151e-09							Cntn1	4.02983e-10
RUFY3	1.0096e-57	0.607859	0.912	0.84	2.39133e-53	HLA-A	1.14614e-31	-0.602964	0.833	0.946	2.71474e-27	MTRNR2L6	3.72302e-64	-0.52425	1	1	8.81835e-60	ALDOA	2.02095e-100	-0.600299	0.866	0.969	4.78683e-96	NLGN4Y	1.21e-45	0.989205	0.486	0.187	2.85e-41	MAST1	2.09272e-27	0.741578	0.68	0.502	4.95683e-23	PALMD	2.85177e-13	-0.520464	0.153	0.397	6.75469e-09							Pcdhga9	5.24909e-10
SDC4	2.68388e-57	-0.977977	0.126	0.311	6.35704e-53	ABI3BP	1.4187e-31	-1.2382	0.028	0.208	3.36034e-27	CYSTM1	8.15227e-64	-1.17303	0.178	0.479	1.93095e-59	PRRT2	4.12344e-100	0.865133	0.733	0.578	9.76677e-96	NAP1L1	1.74e-45	0.512068	0.95	0.784	4.12e-41	SCG2	2.1637e-27	0.680678	0.578	0.357	5.12494e-23	GSTP1	3.15167e-13	-0.535474	0.806	0.917	7.46505e-09							Lgals1	6.01784e-10
TMEFF2	4.54835e-57	1.59349	0.245	0.07	1.07732e-52	MYL9	1.73238e-31	-1.12837	0.007	0.164	4.10332e-27	RTN1	1.44127e-63	1.15256	0.758	0.523	3.41379e-59	NRCAM	4.64812e-100	1.2083	0.651	0.47	1.10095e-95	HBB	1.87e-45	-1.32152	0.266	0.539	4.43e-41	RASSF4	2.50442e-27	-0.839254	0.586	0.771	5.93196e-23	MAGEA12	4.9032e-13	-1.03252	0.081	0.286	1.16137e-08							Snhg1	6.02698e-10
TNC	4.86771e-57	-0.52801	0.493	0.709	1.15296e-52	LRRTM2	2.60455e-31	1.06833	0.693	0.514	6.16913e-27	ASTN2	1.40598e-62	0.766553	0.998	0.996	3.33021e-58	2021-09-03	9.79488e-100	1.11052	0.487	0.268	2.32002e-95	CPVL	2.9e-45	-1.63686	0.105	0.331	6.87e-41	SERPINE2	3.09365e-27	0.510546	0.955	0.91	7.32763e-23	GATS	5.26028e-13	1.44176	0.344	0.147	1.24595e-08							Snrpe	7.66853e-10
SHISA7	5.36677e-57	1.20504	0.248	0.075	1.27117e-52	SNCA	3.2354e-31	-1.13496	0.031	0.214	7.66337e-27	MAGED4B	2.6362e-62	0.664221	0.799	0.637	6.24411e-58	HK2	2.76795e-99	-0.538804	0.344	0.605	6.55617e-95	SATB1	3.49e-45	0.649964	0.639	0.327	8.27e-41	BMPR1B	3.25616e-27	-0.699685	0.113	0.262	7.71253e-23	SCG5	5.84978e-13	1.28167	0.325	0.134	1.38558e-08							Col11a1	7.75125e-10
NNAT	1.08921e-56	1.12165	0.302	0.113	2.57989e-52	PDGFRB	3.46392e-31	-3.10957	0.051	0.24	8.20464e-27	LGALS1	4.82801e-62	-2.26863	0.165	0.438	1.14356e-57	PALMD	7.81063e-97	-0.978683	0.077	0.279	1.85003e-92	KCTD12	1.14e-44	-0.848021	0.17	0.422	2.7e-40	KIF21B	3.96422e-27	0.605161	0.683	0.508	9.38965e-23	SH3GL2	7.52162e-13	1.29508	0.494	0.29	1.78157e-08							Qk	8.32547e-10
ANKS1B	1.38026e-56	1.28611	0.323	0.134	3.2693e-52	TUBA1A	4.42279e-31	0.518045	1	0.998	1.04758e-26	SLITRK3	5.77529e-62	1.30049	0.559	0.264	1.36793e-57	PRDX1	1.55668e-96	-0.533343	0.905	0.969	3.68715e-92	SEMA5A	1.9e-44	0.728222	0.946	0.882	4.51e-40	ARHGEF2	5.26809e-27	0.558359	0.834	0.711	1.2478e-22	HERC2P4	7.92028e-13	0.773233	0.872	0.803	1.876e-08							Thoc7	8.76047e-10
TUBA1C	4.21351e-56	-1.07109	0.544	0.695	9.98012e-52	FABP5	4.6027e-31	-1.47782	0.5	0.737	1.0902e-26	LRP1	8.916e-62	1.46721	0.902	0.862	2.11184e-57	APC2	1.80926e-96	0.644673	0.327	0.134	4.28541e-92	CBX5	3.32e-44	0.655722	0.993	0.986	7.86e-40	ARPP21	5.42039e-27	0.564356	0.841	0.712	1.28387e-22	HK2	9.39827e-13	-0.577519	0.384	0.638	2.22607e-08							Pa2g4	8.84689e-10
SATB1	1.1315e-55	1.00201	0.457	0.242	2.68008e-51	SEPP1	4.6305e-31	-2.28865	0.056	0.251	1.09678e-26	ABHD2	1.87663e-61	1.46694	0.883	0.813	4.44498e-57	RPL7A	2.41163e-96	-0.534401	0.947	0.982	5.71219e-92	EDNRB	4.95e-44	-1.06691	0.228	0.495	1.17e-39	TAGLN3	7.06376e-27	0.668191	0.766	0.6	1.67312e-22	MRPL12	1.1634e-12	-0.6163	0.578	0.788	2.75563e-08							Sdhd	1.1165e-09
FBN3	3.37332e-55	0.824685	0.335	0.142	7.99004e-51	PLP2	5.77621e-31	-1.41365	0.135	0.37	1.36815e-26	CLIP3	4.41585e-61	1.05854	0.836	0.695	1.04594e-56	ITGBL1	3.0138e-96	1.67485	0.29	0.106	7.1385e-92	HNMT	9.14e-44	-1.03539	0.397	0.654	2.16e-39	FGF14	7.10522e-27	0.501583	0.759	0.571	1.68294e-22	GPR56	1.25152e-12	1.49	0.456	0.264	2.96435e-08							Cspg5	1.16758e-09
AHNAK	2.51283e-54	-0.944205	0.122	0.298	5.95189e-50	CHD5	8.36357e-31	-2.60183	0.035	0.212	1.981e-26	LMF1	1.42222e-60	1.15584	0.84	0.661	3.36867e-56	DNPH1	4.10362e-96	-0.642653	0.194	0.437	9.71984e-92	ATP1B2	9.4e-44	-1.01223	0.856	0.908	2.23e-39	NREP	8.9312e-27	0.517925	0.845	0.716	2.11545e-22	RP1-177G6.2	1.25863e-12	0.930952	0.625	0.412	2.9812e-08							Pttg1	1.3236e-09
GPR56	4.61282e-54	0.557263	0.947	0.842	1.09259e-49	MACROD1	8.51469e-31	-2.00751	0.063	0.264	2.01679e-26	COL9A1	3.16548e-60	2.05666	0.522	0.227	7.49776e-56	RPS2	5.56293e-96	-0.621385	0.904	0.96	1.31764e-91	P2RY1	2.02e-43	-1.71882	0.046	0.226	4.79e-39	CXADR	4.68306e-26	0.609145	0.824	0.741	1.10923e-21	KCNJ6	1.32373e-12	1.66133	0.216	0.06	3.13539e-08							Lmnb1	1.4022e-09
ABAT	6.82395e-54	0.632487	0.791	0.643	1.61632e-49	CHD7	1.00663e-30	0.776782	0.945	0.906	2.3843e-26	UGDH-AS1	4.55941e-60	0.879264	1	1	1.07994e-55	GABBR1	8.5228e-96	1.55178	0.312	0.125	2.01871e-91	SSTR2	2.21e-43	-2.01825	0.333	0.56	5.24e-39	KIAA0895L	5.38305e-26	0.610416	0.749	0.594	1.27503e-21	NCAM1	1.3619e-12	0.89531	0.8	0.702	3.22579e-08							Gm8186	1.45628e-09
GALNT13	3.47009e-53	1.3309	0.249	0.081	8.21925e-49	COL4A5	1.69631e-30	-1.22434	0.045	0.233	4.01788e-26	ASIC4	5.61071e-60	1.81816	0.491	0.228	1.32895e-55	RPL36	8.89689e-96	-0.635927	0.801	0.915	2.10732e-91	ANGPTL2	2.33e-43	0.795795	0.786	0.584	5.53e-39	L1CAM	6.94092e-26	0.587177	0.25	0.078	1.64403e-21	KIF2C	1.48649e-12	-1.13974	0.131	0.348	3.52089e-08							Rpl4	1.51986e-09
BASP1	1.59548e-52	1.30755	0.264	0.093	3.77906e-48	CRLF1	1.98011e-30	-2.45771	0.012	0.169	4.69009e-26	CERS2	1.28832e-59	-1.07529	0.31	0.595	3.05152e-55	KCNJ6	4.98774e-95	2.00869	0.225	0.063	1.1814e-90	FERMT1	3.91e-43	0.715977	0.847	0.623	9.27e-39	SLC17A8	9.98574e-26	1.54063	0.186	0.036	2.36522e-21	CDKN3	1.52588e-12	-1.03989	0.166	0.41	3.6142e-08							Lrp1	1.60655e-09
MARCKS	1.74826e-52	0.641688	0.953	0.884	4.14093e-48	GLT8D2	2.03767e-30	-2.09344	0.017	0.18	4.82642e-26	BLVRB	2.71788e-59	-1.14887	0.061	0.298	6.43758e-55	RPL36A	8.19371e-95	-0.606085	0.834	0.926	1.94076e-90	CALCRL	6.21e-43	0.975703	0.707	0.434	1.47e-38	CSRP2	1.54422e-25	-1.75396	0.045	0.145	3.65765e-21	B4GALNT1	1.65072e-12	1.34298	0.456	0.247	3.90991e-08							Snrpc	1.64657e-09
KIF21B	2.37178e-52	0.751556	0.344	0.153	5.61779e-48	PTPRF	2.44051e-30	-0.940181	0.551	0.78	5.78058e-26	MT3	3.15499e-59	1.96015	0.38	0.12	7.47291e-55	AKAP6	9.25664e-95	1.397	0.475	0.281	2.19253e-90	ZMIZ1	1.53e-42	0.664374	0.889	0.701	3.63e-38	PTPRN	1.76571e-25	0.707887	0.292	0.108	4.18227e-21	SLC35F2	1.65848e-12	-0.566709	0.266	0.516	3.92828e-08							Dclk1	1.65948e-09
PFN2	5.94379e-52	1.00189	0.737	0.652	1.40785e-47	CD63	2.57393e-30	-0.702664	0.84	0.931	6.09662e-26	ITGB1	1.22513e-58	-1.17537	0.576	0.782	2.90184e-54	RPL37A	2.16729e-94	-0.571597	0.946	0.981	5.13344e-90	GRIK4	2.03e-42	1.1874	0.528	0.262	4.81e-38	SRRM3	1.81823e-25	0.564208	0.411	0.209	4.30666e-21	GNG3	1.66803e-12	2.5098	0.269	0.098	3.9509e-08							Ncan	1.88341e-09
B4GALNT1	8.96372e-52	1.16676	0.506	0.313	2.12315e-47	OPHN1	5.02874e-30	0.546255	0.999	0.998	1.19111e-25	HIP1R	3.42282e-58	1.43048	0.652	0.426	8.1073e-54	GAS5	8.65208e-94	-0.926611	0.697	0.848	2.04933e-89	TCF12	3.36e-41	0.596539	0.983	0.936	7.96e-37	B4GALNT4	2.22586e-25	0.679909	0.607	0.436	5.27217e-21	CBFA2T2	1.72091e-12	1.08611	0.866	0.803	4.07616e-08							Cox7c	2.33328e-09
CHI3L1	9.79573e-52	-1.41284	0.136	0.31	2.32022e-47	MORN2	5.43132e-30	-0.583165	0.211	0.465	1.28646e-25	KLRC3	4.60608e-58	1.43457	0.535	0.242	1.091e-53	ENO1	9.62592e-94	-0.623926	0.784	0.919	2.28e-89	EIF4B	3.47e-41	0.602957	0.907	0.757	8.21e-37	SLIT1	2.55301e-25	0.608205	0.788	0.641	6.04706e-21	SEZ6	1.87849e-12	-0.761644	0.262	0.505	4.4494e-08							Myo5a	3.22278e-09
RPS16	1.31073e-51	-0.531584	0.944	0.977	3.1046e-47	KLHDC8A	5.62234e-30	1.23771	0.605	0.38	1.33171e-25	PIR	6.81695e-58	-1.3314	0.055	0.278	1.61466e-53	GNB3	5.23203e-93	-0.88457	0.356	0.596	1.23926e-88	NINJ1	2.61e-40	-1.2409	0.217	0.459	6.17e-36	FAM107A	2.64175e-25	-1.42499	0.064	0.178	6.25726e-21	MAGEA3	3.45069e-12	-1.16435	0.075	0.269	8.17331e-08							Actb	3.93893e-09
VCAN	1.33997e-51	0.771719	0.857	0.747	3.17385e-47	SYT8	6.0521e-30	-3.80004	0.013	0.169	1.4335e-25	MEST	8.96823e-58	1.459	0.783	0.499	2.12421e-53	NPTX1	5.59454e-93	-0.514954	0.182	0.416	1.32512e-88	FOSB	2.65e-40	-1.72409	0.177	0.405	6.28e-36	NES	2.64296e-25	-0.589994	0.311	0.502	6.26011e-21	CCND2	3.71175e-12	0.551949	0.962	0.966	8.79166e-08							Cct4	4.42872e-09
GABRA3	1.68551e-51	1.60285	0.204	0.053	3.99229e-47	APCDD1L	6.58922e-30	-2.47293	0.009	0.161	1.56072e-25	MGST1	3.03554e-57	-1.4857	0.165	0.428	7.18999e-53	EYS	8.8967e-93	-0.518053	0.264	0.504	2.10727e-88	AGT	2.93e-40	-0.973299	0.143	0.38	6.95e-36	HAS2	3.35016e-25	-0.659253	0.197	0.364	7.93518e-21	VRK1	4.01199e-12	-0.611899	0.356	0.591	9.5028e-08							Rps23	4.73148e-09
OLIG1	2.41237e-51	0.776699	0.74	0.608	5.71394e-47	PSME1	7.35519e-30	-0.570764	0.483	0.744	1.74215e-25	CDH10	3.72605e-57	1.56596	0.46	0.18	8.82553e-53	GLIPR2	1.46824e-92	-1.18787	0.151	0.365	3.47767e-88	TUBB2A	5.09e-40	-0.933288	0.353	0.594	1.21e-35	LDLR	3.45187e-25	0.610293	0.834	0.744	8.1761e-21	CENPM	4.34506e-12	-0.700825	0.241	0.481	1.02917e-07							Rps3a1	5.29284e-09
LRRC4C	5.81035e-51	0.972068	0.406	0.207	1.37624e-46	STMN4	7.73384e-30	0.934184	0.686	0.508	1.83184e-25	SYNGR2	6.2962e-57	-1.00629	0.153	0.424	1.49132e-52	NPW	5.36781e-92	-1.21462	0.025	0.184	1.27142e-87	UBB	5.58e-40	-0.743639	0.832	0.931	1.32e-35	CD9	3.66708e-25	-1.19282	0.233	0.399	8.68584e-21	NTRK3	5.3144e-12	1.10245	0.372	0.172	1.25877e-07							Atp5b	5.41682e-09
PLXNB1	1.1755e-50	0.763088	0.681	0.521	2.78429e-46	CIB1	9.1546e-30	-0.637733	0.213	0.481	2.16836e-25	CACNG4	4.52223e-56	1.46803	0.546	0.279	1.07114e-51	NOVA1	1.36751e-91	1.46276	0.464	0.262	3.23909e-87	HSPB8	6.23e-40	-2.05513	0.029	0.179	1.48e-35	IL33	3.86729e-25	-0.786459	0.049	0.154	9.16007e-21	AURKB	5.43034e-12	-1.43526	0.084	0.276	1.28623e-07							Pdgfra	5.42632e-09
SLC1A1	1.26039e-50	1.45317	0.28	0.109	2.98536e-46	NXPH4	1.04659e-29	-1.38922	0.024	0.192	2.47894e-25	KCNJ16	8.2204e-56	1.31573	0.348	0.091	1.94708e-51	RPL12	2.95616e-91	-0.531345	0.897	0.951	7.00197e-87	TRAF4	1.27e-39	0.938493	0.591	0.324	3.01e-35	RELN	3.99159e-25	0.933662	0.247	0.08	9.45448e-21	RPS29	6.48256e-12	-0.617726	0.969	0.978	1.53546e-07							Rps24	5.99703e-09
BEX4	1.55296e-50	0.802894	0.596	0.419	3.67833e-46	CAV1	1.8924e-29	-1.78971	0.075	0.275	4.48233e-25	CKS1B	1.35244e-55	-1.07147	0.448	0.718	3.20338e-51	NPM1	2.55324e-90	-0.525964	0.915	0.968	6.04761e-86	MEST	1.27e-39	0.765875	0.805	0.592	3.02e-35	GNG2	7.66845e-25	0.537456	0.753	0.572	1.81635e-20	NREP	6.64575e-12	0.893352	0.938	0.945	1.57411e-07							Arpc2	6.05624e-09
SMOC1	1.59579e-50	1.38061	0.289	0.116	3.7798e-46	CP	3.29837e-29	-3.50047	0.033	0.201	7.81253e-25	B3GNT7	1.49806e-55	1.14172	0.7	0.508	3.54831e-51	MAPK10	3.44443e-90	1.38689	0.365	0.167	8.15849e-86	GPR17	1.57e-39	0.998833	0.57	0.303	3.73e-35	CA8	1.26907e-24	1.02819	0.404	0.219	3.00592e-20	KDM5B	6.7099e-12	1.07115	0.631	0.438	1.58931e-07							Ptprn	6.61439e-09
S100B	1.8226e-50	0.772839	0.811	0.666	4.31701e-46	ANXA2	3.3413e-29	-0.820648	0.372	0.636	7.9142e-25	TACC2	1.54235e-55	1.23997	0.593	0.326	3.65321e-51	RPS5	1.26931e-89	-0.515408	0.945	0.978	3.00648e-85	AHNAK	2.91e-39	-1.0182	0.041	0.202	6.9e-35	PCDHA7	1.3887e-24	1.4863	0.243	0.082	3.28928e-20	TTYH2	7.44293e-12	-0.729748	0.194	0.434	1.76293e-07							Ldha	6.63776e-09
CAPG	2.0678e-50	-1.09523	0.077	0.227	4.89779e-46	PDGFA	3.50577e-29	-1.28996	0.244	0.493	8.30377e-25	APBB2	1.63457e-55	0.822788	0.866	0.718	3.87165e-51	EIF4EBP1	1.5122e-89	-0.752471	0.215	0.452	3.5818e-85	BAZ2B	7.97e-39	0.682289	0.762	0.511	1.89e-34	PCDHGA11	1.50655e-24	0.948025	0.354	0.175	3.56841e-20	PLCH1	7.84111e-12	1.02797	0.366	0.172	1.85724e-07							Spag9	6.65207e-09
ACTN1	6.748e-50	-0.734805	0.245	0.445	1.59833e-45	CHPF	4.78057e-29	-1.03426	0.352	0.593	1.13233e-24	RAMP1	1.89059e-55	1.67674	0.485	0.214	4.47806e-51	TACC2	2.03579e-89	1.46662	0.313	0.131	4.82197e-85	IL33	1.31e-38	-1.44624	0.064	0.246	3.1e-34	ABCG1	2.23139e-24	0.666701	0.626	0.436	5.28527e-20	KPNA2	8.54888e-12	-1.08281	0.397	0.619	2.02489e-07							Emg1	6.98308e-09
SQSTM1	6.89102e-50	-0.861348	0.617	0.776	1.63221e-45	NME3	6.18518e-29	-0.532676	0.189	0.444	1.46502e-24	PRAME	1.92764e-55	-0.674604	0.372	0.68	4.56581e-51	NFIA	4.2653e-89	0.774838	0.902	0.878	1.01028e-84	MT1X	1.89e-38	-1.86984	0.157	0.378	4.48e-34	ERC2	2.69095e-24	0.553625	0.601	0.415	6.37379e-20	CIRBP	9.61953e-12	0.541262	0.981	0.974	2.27848e-07							Npm1	7.18556e-09
HSPB1	8.03902e-50	-0.762896	0.659	0.829	1.90412e-45	GBP3	6.77181e-29	-1.94483	0.007	0.151	1.60397e-24	CSPG4	2.41774e-55	1.13802	0.825	0.653	5.72666e-51	HMGA1	5.68807e-89	-0.682153	0.374	0.611	1.34728e-84	OMG	2.11e-38	0.711463	0.778	0.533	4.99e-34	PCDHB9	3.53927e-24	0.525361	0.859	0.776	8.38312e-20	NLGN1	1.1187e-11	1.50402	0.3	0.126	2.64975e-07							Rps29	8.30544e-09
GNG2	9.12054e-50	0.964925	0.634	0.468	2.16029e-45	DPYD	8.10686e-29	-0.95878	0.127	0.347	1.92019e-24	KLHDC8A	2.52451e-55	-1.50261	0.151	0.407	5.97955e-51	KLF7	9.03613e-89	1.28135	0.598	0.426	2.1403e-84	SLC1A1	5.13e-38	1.10798	0.513	0.247	1.21e-33	FAM212B	4.36612e-24	0.52095	0.847	0.735	1.03416e-19	VCAN	1.12669e-11	0.913427	0.45	0.247	2.66869e-07							Uqcrc2	8.72474e-09
RPS21	1.86719e-49	-0.531497	0.772	0.888	4.42262e-45	CPAMD8	1.00032e-28	-1.42511	0.036	0.207	2.36936e-24	TPM3	3.13729e-55	-0.679201	0.955	0.976	7.43099e-51	UGT8	1.3728e-88	0.502263	0.971	0.952	3.25161e-84	HLA-H	6.46e-38	-0.750896	0.491	0.681	1.53e-33	GPR98	4.37936e-24	-0.801919	0.035	0.122	1.03729e-19	HIST1H4C	1.14922e-11	-1.35928	0.431	0.619	2.72203e-07							Taf9	9.29462e-09
RTN3	2.96056e-49	0.504692	0.947	0.935	7.01239e-45	IFITM3	1.27497e-28	-0.993433	0.334	0.604	3.0199e-24	PCDHGC4	3.26861e-55	1.78316	0.443	0.174	7.74202e-51	NLGN4X	2.66872e-88	1.54991	0.218	0.063	6.32112e-84	CXCL12	8.2e-38	-1.21792	0.125	0.341	1.94e-33	ACTL6B	4.91459e-24	0.744555	0.444	0.246	1.16407e-19	PVRIG	1.27752e-11	0.796929	0.344	0.157	3.02594e-07							Rpl23a-ps3	1.04768e-08
C1orf61	9.85296e-49	0.558773	0.933	0.868	2.33377e-44	CST3	1.29821e-28	-1.68781	0.749	0.881	3.07493e-24	CHD7	8.66953e-55	0.746934	0.933	0.847	2.05346e-50	FBL	5.31802e-88	-0.55044	0.548	0.762	1.25963e-83	MEGF11	2.09e-37	0.745567	0.804	0.57	4.96e-33	CSRNP3	1.60041e-23	0.662302	0.588	0.403	3.79074e-19	C1QBP	1.33234e-11	-0.633059	0.728	0.89	3.15578e-07							Grm5	1.05712e-08
NXPH1	9.86325e-49	1.45882	0.466	0.285	2.33621e-44	ITGA3	1.82448e-28	-1.12695	0.055	0.24	4.32145e-24	SH3BGRL	1.13099e-54	-0.982797	0.5	0.751	2.67886e-50	TUBB2A	8.5001e-88	0.889327	0.747	0.627	2.01333e-83	CSMD1	2.28e-37	0.652867	0.801	0.616	5.39e-33	CPLX2	1.6182e-23	0.644534	0.356	0.172	3.83286e-19	PPP1R14A	1.39943e-11	-0.915893	0.131	0.331	3.31468e-07							Prdx4	1.30561e-08
CADM1	1.0439e-48	0.778589	0.74	0.572	2.47259e-44	MVP	1.92278e-28	-1.33206	0.064	0.254	4.5543e-24	PSMB4	1.36761e-54	-0.5811	0.949	0.983	3.23931e-50	RPS28	8.73741e-88	-0.643959	0.881	0.945	2.06954e-83	GLUL	3.26e-37	-0.925782	0.785	0.879	7.73e-33	MYH7	2.76511e-23	1.06972	0.337	0.164	6.54943e-19	MAD2L1	1.52553e-11	-0.78627	0.369	0.581	3.61338e-07							Hnrnpc	1.42659e-08
AFAP1L2	1.15623e-48	1.29933	0.267	0.1	2.73865e-44	EPN2	3.09578e-28	1.1067	0.872	0.85	7.33267e-24	TMEM212	1.52114e-54	0.793459	0.991	0.987	3.60298e-50	SEZ6L	5.75785e-87	0.682688	0.847	0.748	1.3638e-82	PTPRK	3.37e-37	0.919585	0.511	0.239	7.97e-33	AHNAK	3.58181e-23	-0.992003	0.057	0.159	8.48387e-19	LURAP1L	1.63616e-11	1.07811	0.266	0.098	3.8754e-07							Smc4	1.50418e-08
MMP16	1.28352e-48	0.999092	0.594	0.42	3.04015e-44	COL14A1	3.31973e-28	-1.39923	0.016	0.168	7.86311e-24	ZEB1	3.05666e-54	0.961836	0.788	0.585	7.24e-50	SNHG6	5.51618e-86	-0.515152	0.557	0.776	1.30656e-81	IGFBP7	5.62e-37	-1.48244	0.054	0.223	1.33e-32	MYO16	4.41492e-23	1.08904	0.347	0.18	1.04572e-18	GABRB1	1.7804e-11	1.59655	0.138	0.024	4.21706e-07							Rps15a	1.52313e-08
EPHB1	1.87451e-48	1.06332	0.403	0.213	4.43996e-44	LPPR1	3.33725e-28	1.02414	0.664	0.471	7.90461e-24	ITGB8	4.85277e-54	0.67512	0.906	0.812	1.14943e-49	GNB2L1	1.29834e-85	-0.5278	0.927	0.971	3.07526e-81	SGK1	1.39e-36	0.854647	0.695	0.45	3.3e-32	HRSP12	5.40366e-23	-1.34086	0.279	0.443	1.27991e-18	EYA1	1.86133e-11	0.950947	0.328	0.14	4.40875e-07							Ppp1ca	1.53591e-08
C8orf4	2.4836e-48	-0.859515	0.269	0.478	5.88265e-44	CYBRD1	3.80061e-28	-1.36858	0.082	0.282	9.00213e-24	C10orf90	5.27816e-54	-1.25475	0.043	0.245	1.25018e-49	DCN	1.78612e-85	-1.41295	0.071	0.247	4.23061e-81	GATM	1.52e-36	-1.06641	0.268	0.505	3.59e-32	KLRC2	7.89378e-23	0.999003	0.82	0.718	1.86972e-18	DNAJC9	2.25386e-11	-0.511394	0.344	0.579	5.33849e-07							Ccdc88a	1.53728e-08
S100A11	2.98415e-48	-1.13515	0.165	0.345	7.06825e-44	DLL3	5.59173e-28	0.987755	0.523	0.292	1.32446e-23	SLC6A1	5.3365e-54	1.45848	0.476	0.213	1.264e-49	ANGPTL2	1.53239e-84	1.14501	0.476	0.284	3.62963e-80	MAML2	2.16e-36	0.744671	0.851	0.691	5.12e-32	TMEM196	1.27066e-22	0.98797	0.266	0.098	3.00968e-18	CSNK1E	2.61627e-11	0.885945	0.822	0.753	6.1969e-07							Gm6576	1.71728e-08
CCDC144B	3.89791e-48	0.570446	0.976	0.956	9.23259e-44	CLIC4	6.03653e-28	-0.565615	0.507	0.759	1.42981e-23	COL5A2	6.79522e-54	-2.21521	0.059	0.265	1.60952e-49	AHCY	2.62197e-84	-0.573197	0.347	0.592	6.2104e-80	RGMA	3.43e-36	-0.710062	0.244	0.499	8.13e-32	RGMB	1.35112e-22	0.698761	0.849	0.777	3.20026e-18	PTPRK	2.84748e-11	1.03361	0.466	0.279	6.74454e-07							Rpl37	1.72187e-08
CRMP1	6.47226e-48	0.880189	0.707	0.575	1.53302e-43	HLA-H	6.4352e-28	-0.594122	0.545	0.755	1.52424e-23	GPR98	6.95789e-54	-0.526499	0.3	0.595	1.64805e-49	DPP6	8.42062e-84	1.49602	0.415	0.233	1.99451e-79	FSCN1	1.32e-35	0.709255	0.492	0.23	3.13e-31	MLC1	1.60927e-22	-1.41162	0.199	0.354	3.81172e-18	CDR1	2.9677e-11	1.29701	0.406	0.209	7.0293e-07							Gnas	1.76328e-08
PHLDA1	1.38901e-47	0.89482	0.904	0.877	3.29001e-43	CTSA	7.11484e-28	-0.575114	0.42	0.667	1.68522e-23	FBN3	1.45329e-53	1.29213	0.325	0.085	3.44226e-49	KLF12	8.05383e-83	0.908005	0.544	0.347	1.90763e-78	STON2	1.47e-35	-1.22106	0.539	0.709	3.48e-31	STK3	2.03289e-22	-0.783496	0.154	0.301	4.8151e-18	FKBP11	3.12099e-11	-0.958307	0.2	0.409	7.39238e-07							Ptprz1	1.99089e-08
PTRF	1.51233e-47	-0.761824	0.31	0.493	3.58211e-43	FGFR3	9.09596e-28	-1.36269	0.036	0.205	2.15447e-23	CTTNBP2	1.92707e-53	1.28177	0.71	0.514	4.56447e-49	ZIC4	1.41888e-82	0.927093	0.62	0.426	3.36076e-78	DCX	2.27e-35	0.581159	0.908	0.805	5.39e-31	MAPRE2	2.31481e-22	0.565211	0.835	0.745	5.48286e-18	ZBTB8A	4.00444e-11	0.737947	0.962	0.943	9.48491e-07							Snrpg	2.13173e-08
ATP1A3	1.76442e-47	0.684751	0.492	0.288	4.17921e-43	UPP1	9.69064e-28	-2.18104	0.09	0.286	2.29533e-23	ARPC5	3.29671e-53	-0.805084	0.742	0.863	7.80858e-49	FGF14	1.67522e-82	1.40072	0.355	0.17	3.96793e-78	HEPN1	2.33e-35	-0.839869	0.891	0.938	5.53e-31	GEM	2.37616e-22	-2.06648	0.025	0.099	5.62817e-18	FAM198B	5.53634e-11	1.15708	0.309	0.134	1.31134e-06							Mmp16	2.27691e-08
CTTNBP2	8.11448e-47	0.956073	0.602	0.438	1.922e-42	FRZB	1.15184e-27	-2.23564	0.026	0.184	2.72825e-23	LMNA	3.73514e-53	-1.36781	0.432	0.667	8.84705e-49	ABLIM1	2.43238e-82	1.3287	0.476	0.281	5.76134e-78	CHST11	2.33e-35	0.850414	0.461	0.214	5.53e-31	ACHE	2.68404e-22	1.00182	0.297	0.13	6.35741e-18	SOGA1	5.87771e-11	0.759881	0.675	0.505	1.39219e-06							Snrpf	2.55489e-08
NOVA1	1.63187e-46	0.548057	0.949	0.905	3.86525e-42	BMPR1B	1.1825e-27	-0.832519	0.051	0.233	2.80088e-23	HSPB8	3.89639e-53	-1.61927	0.064	0.279	9.229e-49	THSD7A	5.31348e-82	1.35983	0.368	0.183	1.25855e-77	KDM5D	4.59e-35	1.06512	0.385	0.142	1.09e-30	DUSP26	3.68416e-22	0.538668	0.574	0.381	8.7263e-18	CLDN1	7.43748e-11	1.22482	0.309	0.138	1.76164e-06							Cdca8	2.75602e-08
ADM	1.65479e-46	-1.69803	0.107	0.259	3.91954e-42	ANXA1	1.33454e-27	-0.761012	0.15	0.379	3.161e-23	OST4	5.10601e-53	-0.57479	0.742	0.91	1.20941e-48	RPL18A	1.10389e-81	-0.548941	0.957	0.974	2.61466e-77	ARHGEF2	4.97e-35	1.09314	0.634	0.408	1.18e-30	PMP2	3.83099e-22	-0.675961	0.952	0.977	9.07408e-18	CALM1	9.64662e-11	0.602608	0.947	0.943	2.2849e-06							Atrx	2.92641e-08
TULP3	2.35402e-46	-0.690132	0.23	0.423	5.57573e-42	FBLN5	1.44108e-27	-1.83832	0.02	0.173	3.41334e-23	TAOK3	5.22208e-53	1.25421	0.77	0.603	1.2369e-48	FAIM2	2.37113e-81	1.52497	0.21	0.065	5.61627e-77	CDR1	6.68e-35	0.503001	0.867	0.663	1.58e-30	PSD2	4.40359e-22	0.66446	0.586	0.42	1.04303e-17	NUDT1	1.26104e-10	-0.551138	0.328	0.557	2.98689e-06							Nasp	3.21282e-08
SOX10	3.66074e-46	1.06856	0.19	0.051	8.67082e-42	PFKL	1.69108e-27	-1.2118	0.544	0.774	4.0055e-23	PARP1	5.28835e-53	-0.87471	0.816	0.919	1.2526e-48	NDRG4	9.11031e-81	1.2709	0.406	0.214	2.15787e-76	CDKN1A	1.09e-34	-1.89396	0.103	0.29	2.59e-30	CCND1	4.57442e-22	0.522683	0.835	0.707	1.0835e-17	PBK	1.26974e-10	-0.949766	0.125	0.316	3.0075e-06							H2afv	3.69296e-08
GPR17	3.76406e-46	2.37597	0.152	0.028	8.91555e-42	MATR3	2.26347e-27	0.507187	0.966	0.981	5.36125e-23	IGSF9B	8.13558e-53	1.14003	0.654	0.4	1.92699e-48	SNRPB	2.01081e-80	-0.507634	0.581	0.788	4.76281e-76	COL20A1	1.42e-34	1.20129	0.4	0.159	3.37e-30	FAT1	5.78261e-22	-0.54332	0.215	0.391	1.36967e-17	ELAVL3	1.26992e-10	0.523431	0.516	0.321	3.00793e-06							Top2b	3.7627e-08
SNX22	4.28279e-46	1.25597	0.65	0.548	1.01442e-41	RRBP1	2.99221e-27	-0.654249	0.228	0.474	7.08734e-23	RBP1	1.08661e-52	0.821129	0.674	0.435	2.57374e-48	RPS19	2.04489e-79	-0.542095	0.895	0.962	4.84354e-75	FLVCR2	2.07e-34	-1.53474	0.034	0.176	4.9e-30	BIN1	9.07461e-22	0.602569	0.673	0.511	2.14941e-17	MRPS15	1.2967e-10	-0.513022	0.403	0.638	3.07137e-06							Ednrb	4.11234e-08
LPHN3	4.72667e-46	0.928422	0.669	0.503	1.11956e-41	CBX5	3.724e-27	0.629322	0.999	0.997	8.82067e-23	ORC4	2.20109e-52	0.670479	0.999	0.999	5.21351e-48	HES6	1.64876e-78	-0.678589	0.238	0.465	3.90525e-74	CRB1	2.1e-34	0.684144	0.688	0.438	4.97e-30	SLC24A3	1.0376e-21	0.861341	0.393	0.215	2.45767e-17	BUB1B	1.363e-10	-0.55256	0.128	0.331	3.22839e-06							Cdca3	4.43931e-08
CXADR	3.13321e-45	0.902448	0.857	0.777	7.42132e-41	LEPREL1	4.09172e-27	-1.11804	0.043	0.213	9.69166e-23	A2M	2.73983e-52	-2.77704	0.16	0.384	6.48957e-48	ZBTB20	1.82625e-78	0.728195	0.769	0.637	4.32565e-74	FAM66C	2.14e-34	0.741955	0.63	0.391	5.06e-30	TMEM179	1.11207e-21	0.65384	0.281	0.12	2.63404e-17	LRRC16A	1.40224e-10	0.879104	0.666	0.486	3.32135e-06							Homer3	4.44183e-08
PCDHGC3	3.3789e-45	0.731014	0.87	0.802	8.00326e-41	BLVRB	4.45508e-27	-2.14867	0.016	0.165	1.05523e-22	CSMD2	3.0197e-52	0.691455	0.676	0.419	7.15247e-48	CRMP1	3.64833e-78	1.01857	0.664	0.516	8.64143e-74	AFAP1	2.32e-34	0.846045	0.578	0.337	5.5e-30	KLRK1	1.53214e-21	0.860126	0.457	0.276	3.62902e-17	FAM127A	1.45487e-10	0.940854	0.778	0.741	3.446e-06							Rps28	4.65662e-08
CIB1	7.72068e-45	-0.567312	0.286	0.481	1.82872e-40	CPQ	5.80647e-27	-0.869487	0.086	0.287	1.37532e-22	SOX8	6.12137e-52	1.11669	0.583	0.327	1.44991e-47	RELN	1.71911e-77	0.686643	0.563	0.37	4.07188e-73	PLTP	2.55e-34	-0.927213	0.222	0.454	6.03e-30	POLR1D	2.74112e-21	-0.843095	0.091	0.21	6.49263e-17	TSPAN3	1.51331e-10	0.628775	0.912	0.922	3.58442e-06							Ndufa4	4.90436e-08
CDR1	8.47694e-45	1.00482	0.268	0.107	2.00785e-40	FBLN1	6.11584e-27	-0.776426	0.528	0.735	1.4486e-22	DUSP1	9.46419e-52	1.30537	0.663	0.433	2.24169e-47	AFF3	2.11153e-77	1.10474	0.601	0.459	5.00137e-73	LINC00263	2.79e-34	-1.0247	0.48	0.682	6.6e-30	LTBP4	3.08501e-21	0.59103	0.553	0.394	7.30715e-17	KIAA0101	1.59724e-10	-0.692924	0.522	0.7	3.78322e-06							Rpl7	5.07614e-08
CELF5	1.2217e-44	0.550038	0.258	0.098	2.89372e-40	HS3ST3A1	6.29337e-27	-1.10445	0.034	0.198	1.49065e-22	ST6GAL2	1.06982e-51	1.02016	0.671	0.457	2.53398e-47	RPS29	1.93023e-76	-0.537204	0.775	0.883	4.57194e-72	ILDR2	3.3e-34	0.721631	0.562	0.303	7.81e-30	SLC4A3	3.20531e-21	0.816302	0.312	0.148	7.5921e-17	LMO4	1.66029e-10	0.848089	0.516	0.331	3.93257e-06							Rrm2	5.13895e-08
HN1	1.43942e-44	0.811289	0.75	0.658	3.40942e-40	HEPH	6.37427e-27	-1.4734	0.015	0.16	1.50981e-22	EFNA5	1.13293e-51	-1.03819	0.211	0.471	2.68346e-47	SLC38A5	6.74503e-76	-2.17736	0.063	0.221	1.59763e-71	MTHFD2	3.41e-34	-0.957773	0.44	0.642	8.08e-30	KIF3C	5.565e-21	0.524401	0.786	0.664	1.31813e-16	MLLT4	1.84524e-10	0.778311	0.616	0.422	4.37065e-06							Chchd1	5.29957e-08
MYO1E	3.33365e-44	-0.842054	0.13	0.29	7.89607e-40	PHLDB1	9.25709e-27	0.906209	0.824	0.747	2.19263e-22	CRB1	2.24444e-51	-0.960915	0.167	0.425	5.31619e-47	SLC4A8	1.48541e-74	1.02454	0.869	0.826	3.51834e-70	CSMD3	4.49e-34	0.603614	0.789	0.595	1.06e-29	VASH1	5.74106e-21	0.513512	0.771	0.662	1.35983e-16	DLX2	2.10245e-10	0.857896	0.103	0.012	4.97986e-06							Gm10269	5.66941e-08
GRIK3	3.67783e-44	0.919504	0.593	0.417	8.71131e-40	SOX4	1.1135e-26	0.844207	0.984	0.954	2.63743e-22	SLC22A17	4.15893e-51	0.974493	0.69	0.435	9.85083e-47	ANK2	1.04978e-73	1.01872	0.399	0.214	2.4865e-69	AMOTL2	5.25e-34	0.81889	0.567	0.319	1.24e-29	LAMA5	6.84372e-21	0.692882	0.699	0.564	1.621e-16	MAP6	2.59223e-10	0.788219	0.266	0.107	6.13995e-06							Uchl5	6.06764e-08
FN1	5.03346e-44	-1.91974	0.244	0.412	1.19223e-39	CD55	1.61788e-26	-1.25078	0.026	0.181	3.8321e-22	GRN	5.22836e-51	-0.823115	0.494	0.747	1.23839e-46	UNC13C	1.49208e-73	1.11495	0.219	0.076	3.53414e-69	ASCL1	1.64e-33	0.541756	0.726	0.472	3.89e-29	PHACTR1	6.85093e-21	0.706912	0.371	0.199	1.62271e-16	TOP2A	2.64376e-10	-0.9661	0.225	0.434	6.26201e-06							Gm10260	6.48722e-08
TSPAN13	6.18826e-44	1.05698	0.559	0.407	1.46575e-39	PLA2G16	1.7354e-26	-0.789387	0.094	0.298	4.11047e-22	CMYA5	1.10949e-50	0.948184	0.269	0.051	2.62794e-46	GSTP1	1.5873e-73	-0.757618	0.688	0.843	3.75967e-69	HLA-E	1.66e-33	-2.04981	0.29	0.504	3.93e-29	CDKN1A	7.45808e-21	-1.68206	0.069	0.173	1.76652e-16	FREM1	2.66223e-10	0.903795	0.459	0.274	6.30576e-06							Timm13	6.53251e-08
TIMP1	7.40143e-44	-0.743377	0.591	0.785	1.7531e-39	PCDHGA10	1.78647e-26	-1.08885	0.091	0.287	4.23144e-22	LOC646214	1.23624e-50	0.677214	0.999	0.999	2.92817e-46	UBE2T	1.72102e-73	-0.791782	0.166	0.364	4.07641e-69	ETV1	2.58e-33	0.683428	0.941	0.939	6.12e-29	CCDC136	8.67004e-21	0.542764	0.486	0.308	2.05359e-16	ZNF483	2.9692e-10	0.573912	0.847	0.771	7.03284e-06							Rev3l	6.6066e-08
TCF4	7.99141e-44	0.630648	0.984	0.941	1.89284e-39	BAG3	1.80193e-26	-0.726145	0.096	0.294	4.26806e-22	TUBB2B	2.00209e-50	0.569941	0.997	0.945	4.74214e-46	SERINC1	2.23651e-73	0.780092	0.884	0.874	5.29739e-69	PTPRO	3.12e-33	0.961289	0.417	0.172	7.38e-29	MKRN3	9.01499e-21	0.516245	0.827	0.721	2.13529e-16	CCNI	3.07968e-10	0.767293	0.928	0.938	7.29453e-06							Rps7	7.02217e-08
KLF12	1.00702e-43	0.70387	0.667	0.5	2.38524e-39	ITPR1	2.36987e-26	-0.76228	0.072	0.258	5.61328e-22	CD63	3.59118e-50	-0.841338	0.822	0.92	8.50606e-46	TCEAL7	3.19802e-73	1.29844	0.366	0.191	7.57483e-69	IFITM10	4.84e-33	0.692452	0.554	0.291	1.15e-28	CD44	9.99645e-21	-1.81275	0.025	0.096	2.36776e-16	ACTR3B	3.11495e-10	1.15618	0.494	0.324	7.37806e-06							Chchd2	7.11973e-08
ARGLU1	1.20327e-43	0.503106	0.943	0.895	2.85006e-39	NPC2	3.17515e-26	-1.17252	0.093	0.298	7.52065e-22	PTPRE	5.83507e-50	1.52928	0.351	0.11	1.38209e-45	GNG2	1.11854e-72	1.2013	0.504	0.32	2.64937e-68	ZEB2	7.46e-33	0.653786	0.837	0.668	1.77e-28	CACNA2D1	1.45893e-20	0.894062	0.5	0.349	3.45563e-16	MKI67	3.1771e-10	-0.818545	0.162	0.353	7.52527e-06							Cenpm	7.1783e-08
CXXC4	1.42955e-43	0.682022	0.471	0.281	3.38603e-39	PVRL2	3.32396e-26	-0.66634	0.085	0.286	7.87313e-22	APOD	7.58498e-50	1.59711	0.794	0.546	1.79658e-45	DPYSL3	1.16345e-72	0.670697	0.77	0.64	2.75576e-68	SCN3A	8.55e-33	0.708484	0.742	0.515	2.02e-28	HS3ST1	1.77313e-20	-0.840715	0.235	0.389	4.19985e-16	NGRN	3.23263e-10	0.691233	0.806	0.843	7.6568e-06							Slc1a2	7.54515e-08
IFITM3	2.3375e-43	-0.594744	0.363	0.562	5.53661e-39	ANGPT1	3.3295e-26	-0.894234	0.049	0.225	7.88624e-22	PPIC	7.96259e-50	-1.23674	0.09	0.312	1.88602e-45	SCHIP1	1.271e-72	1.27216	0.41	0.231	3.0105e-68	C1QTNF5	1.05e-32	-0.626484	0.15	0.351	2.49e-28	ACAP3	2.19959e-20	0.529128	0.809	0.673	5.20994e-16	TACC3	3.23968e-10	-0.88544	0.116	0.303	7.6735e-06							Txnl4a	7.54918e-08
2022-09-03	3.62513e-43	0.826553	0.446	0.267	8.58648e-39	MAPK4	5.26547e-26	-0.949487	0.157	0.372	1.24718e-21	REXO1L1	1.13844e-49	0.562713	0.97	0.956	2.69651e-45	PSD3	1.28355e-72	1.24699	0.355	0.184	3.04021e-68	MFRP	1.05e-32	-0.626484	0.15	0.351	2.49e-28	C1orf198	2.26981e-20	-0.812687	0.369	0.531	5.37627e-16	CSMD1	3.40259e-10	1.09374	0.272	0.114	8.05937e-06							Gria4	7.58938e-08
REV3L	5.45877e-43	0.670054	0.818	0.738	1.29296e-38	CD151	6.15626e-26	-0.775454	0.529	0.735	1.45817e-21	TRIO	1.34806e-49	0.952116	0.825	0.673	3.19301e-45	NMNAT2	2.93175e-72	1.07825	0.351	0.179	6.94414e-68	GABBR1	1.09e-32	0.511219	0.938	0.81	2.59e-28	RNF165	2.56739e-20	0.667279	0.578	0.404	6.08111e-16	CDCA8	3.60168e-10	-0.961397	0.109	0.293	8.53093e-06							Gm9843	7.82638e-08
HIPK2	6.26183e-43	0.618193	0.881	0.854	1.48318e-38	LIMCH1	7.44587e-26	-0.572619	0.245	0.479	1.76363e-21	NEU4	1.35201e-49	1.52319	0.413	0.165	3.20237e-45	STXBP1	3.51085e-72	0.808672	0.788	0.708	8.31581e-68	SLC4A4	1.61e-32	-0.776738	0.121	0.319	3.82e-28	BDH2	2.8056e-20	-0.866232	0.049	0.139	6.64535e-16	NPTX1	3.78721e-10	-0.587393	0.25	0.466	8.97039e-06							Nabp2	8.16363e-08
WWTR1	1.0086e-42	-0.565491	0.473	0.637	2.38897e-38	LRP10	9.70597e-26	-0.738426	0.141	0.358	2.29896e-21	CSPG5	1.37558e-49	1.52532	0.457	0.204	3.2582e-45	RPL39	4.26861e-72	-0.50352	0.876	0.945	1.01106e-67	OPCML	2.62e-32	0.781326	0.599	0.335	6.21e-28	FSTL4	3.0295e-20	0.823109	0.203	0.064	7.17566e-16	TMSB4X	3.79869e-10	0.591007	0.966	0.898	8.99758e-06							Apex1	8.20328e-08
PXDN	1.12874e-42	0.773679	0.543	0.36	2.67354e-38	GPC3	1.13183e-25	-2.69674	0.033	0.187	2.68086e-21	GPRIN3	2.01771e-49	-0.868946	0.05	0.244	4.77914e-45	SLC38A1	6.13044e-72	0.790674	0.679	0.533	1.45206e-67	PCDHGC3	2.66e-32	0.542628	0.959	0.938	6.29e-28	TACC2	3.17965e-20	0.572334	0.792	0.657	7.53132e-16	PPFIA4	3.88643e-10	0.729214	0.384	0.197	9.2054e-06							Cox8a	8.3968e-08
GLRB	1.33131e-42	1.44355	0.265	0.112	3.15335e-38	APCDD1L-AS1	1.30731e-25	-1.23391	0.016	0.157	3.09649e-21	RASSF2	2.21624e-49	1.35208	0.669	0.466	5.2494e-45	ZNF704	8.98936e-72	0.788831	0.833	0.765	2.12922e-67	LIX1	3.17e-32	-1.17875	0.137	0.332	7.51e-28	PCDHB5	3.82244e-20	0.685703	0.408	0.239	9.05382e-16	FGF13	3.97534e-10	1.67325	0.212	0.074	9.41598e-06							Nfia	8.53993e-08
UPP1	1.49377e-42	-1.20111	0.181	0.343	3.53813e-38	NXPH1	1.50917e-25	1.24442	0.366	0.169	3.57462e-21	SOX2-OT	2.92837e-49	0.771189	0.909	0.775	6.93614e-45	SYT1	1.24413e-71	1.55519	0.488	0.323	2.94685e-67	RGR	3.33e-32	0.782848	0.594	0.346	7.9e-28	NUPR1	4.00102e-20	-1.39415	0.051	0.143	9.47682e-16	IGF2BP1	4.05672e-10	-0.556745	0.062	0.222	9.60875e-06							Rps27	9.00301e-08
AGAP2	1.74383e-42	0.767914	0.4	0.225	4.13043e-38	CACNA1E	2.50425e-25	0.783461	0.348	0.147	5.93157e-21	LAMC1	3.6228e-49	-0.87059	0.315	0.573	8.58097e-45	MAPT	2.93438e-71	1.01361	0.409	0.232	6.95038e-67	DSEL	3.67e-32	0.580012	0.965	0.931	8.69e-28	RUNDC3A	4.07998e-20	0.539553	0.625	0.475	9.66385e-16	ARHGEF2	4.20998e-10	1.0418	0.641	0.493	9.97175e-06							Rps25	9.62613e-08
PTPRO	2.03651e-42	1.01375	0.437	0.253	4.82367e-38	TIMP3	2.58204e-25	-0.616981	0.157	0.389	6.11581e-21	GFRA1	3.68258e-49	1.26117	0.393	0.147	8.72255e-45	PPP2R2C	3.22437e-71	1.33982	0.195	0.062	7.63725e-67	BHLHE40	4.6e-32	-1.46652	0.051	0.202	1.09e-27	ROBO1	4.08788e-20	0.581513	0.696	0.569	9.68254e-16	CSAG1	4.48857e-10	-0.904835	0.066	0.233	1.06316e-05							Tubb4b	9.81631e-08
FGF14	2.13365e-42	0.882526	0.398	0.221	5.05376e-38	GRN	2.70341e-25	-0.532465	0.444	0.682	6.4033e-21	PHACTR3	5.66023e-49	1.09166	0.723	0.509	1.34068e-44	CDKN3	4.44888e-71	-1.2496	0.077	0.239	1.05376e-66	HIST2H2AA3	4.72e-32	-2.15853	0.131	0.317	1.12e-27	ITPKB	5.67368e-20	-0.9148	0.057	0.152	1.34387e-15	NDP	5.46233e-10	1.27294	0.284	0.126	1.29381e-05							Ttc3	1.00525e-07
PHLDB1	2.23863e-42	0.758838	0.665	0.51	5.30241e-38	GATA2	2.80881e-25	-2.42951	0.1	0.282	6.65295e-21	PPAP2B	1.36455e-48	1.29714	0.666	0.406	3.23208e-44	APBA2	4.96479e-71	1.20016	0.605	0.459	1.17596e-66	HIST2H2AA4	4.72e-32	-2.15853	0.131	0.317	1.12e-27	EPB41L2	5.68519e-20	-0.525922	0.367	0.539	1.3466e-15	GAA	5.76216e-10	-0.605862	0.25	0.469	1.36483e-05							Grik3	1.09784e-07
NPC2	2.94787e-42	-0.711073	0.178	0.353	6.98233e-38	SLC7A5	2.85037e-25	-1.56572	0.258	0.472	6.75139e-21	L2HGDH	4.62263e-48	0.500379	0.984	0.985	1.09492e-43	PLP2	8.25323e-71	-0.606555	0.142	0.332	1.95486e-66	GATSL3	8.66e-32	-1.2295	0.063	0.225	2.05e-27	PHGDH	7.51062e-20	-0.596719	0.585	0.718	1.77896e-15	TSPYL1	5.91173e-10	0.788588	0.916	0.914	1.40025e-05							Taok1	1.10019e-07
ENAH	2.94813e-42	0.562595	0.978	0.964	6.98293e-38	C12orf75	3.65518e-25	-1.00209	0.048	0.216	8.65766e-21	AGT	4.87084e-48	-1.38123	0.102	0.322	1.15371e-43	SLC16A1	1.12696e-69	-0.834233	0.362	0.573	2.66933e-65	NTRK2	8.72e-32	-0.861589	0.827	0.893	2.06e-27	PLP1	9.86283e-20	-0.898075	0.464	0.615	2.33611e-15	PDGFA	6.18975e-10	0.85131	0.275	0.114	1.4661e-05							Dut	1.29127e-07
UNC79	3.12533e-42	0.765556	0.316	0.15	7.40266e-38	AK4	3.67892e-25	-0.971721	0.231	0.449	8.7139e-21	SNRPG	1.35053e-47	-0.662165	0.676	0.862	3.19886e-43	HLA-C	1.1334e-69	-0.770823	0.183	0.365	2.68458e-65	EFEMP1	8.72e-32	-0.885593	0.124	0.319	2.07e-27	SORL1	1.19757e-19	-1.11152	0.25	0.395	2.83656e-15	NFASC	6.63198e-10	1.39206	0.462	0.276	1.57085e-05							Grik4	1.29382e-07
LHFPL3-AS1	3.51938e-42	1.72871	0.239	0.093	8.336e-38	TNNI2	4.15776e-25	-2.49672	0.012	0.145	9.84807e-21	CLK1	1.89132e-47	0.971976	0.817	0.678	4.47978e-43	MAP6	1.57461e-69	1.0107	0.381	0.206	3.72962e-65	TMEM151B	1.07e-31	-0.54581	0.254	0.485	2.54e-27	CCDC80	3.47205e-19	-1.07655	0.028	0.098	8.22391e-15	MYL6	7.15284e-10	0.539677	0.959	0.972	1.69422e-05							Ppa1	1.33833e-07
A2M	1.10183e-41	-1.7712	0.174	0.329	2.60979e-37	HSPA1B	5.25153e-25	-0.714686	0.329	0.545	1.24388e-20	MYL12A	3.3675e-47	-0.81784	0.498	0.737	7.97626e-43	RYR3	1.57667e-69	0.91803	0.224	0.085	3.73451e-65	C1orf61	1.15e-31	-0.615161	0.995	0.991	2.73e-27	GABRA3	3.98579e-19	0.859593	0.313	0.158	9.44075e-15	SIGMAR1	7.38317e-10	-0.528147	0.562	0.753	1.74878e-05							Rpl6	1.47562e-07
ALCAM	1.16414e-41	1.17525	0.527	0.371	2.75738e-37	KLRC4	5.36848e-25	1.70609	0.348	0.153	1.27158e-20	C1orf54	3.69647e-47	-1.98411	0.028	0.195	8.75546e-43	SLC22A17	3.50944e-69	1.20292	0.44	0.269	8.31245e-65	TUBB2B	1.26e-31	-0.637264	0.913	0.938	2.98e-27	DNAJC6	4.60529e-19	0.522984	0.569	0.392	1.09081e-14	BZW2	8.32972e-10	-0.515506	0.553	0.76	1.97298e-05							Nudt21	1.51225e-07
UCHL1	1.61999e-41	0.602602	0.789	0.686	3.83712e-37	LYN	5.69058e-25	-0.669746	0.045	0.209	1.34787e-20	TMSB10	4.3178e-47	-0.98227	0.88	0.945	1.02271e-42	TYMS	5.07102e-69	-0.864171	0.152	0.337	1.20112e-64	PRLHR	1.46e-31	-1.01919	0.081	0.254	3.45e-27	AGT	6.45019e-19	-1.56248	0.095	0.205	1.52779e-14	TIAM1	9.23594e-10	0.564185	0.444	0.26	2.18762e-05							Nudc	1.56581e-07
LOX	2.62066e-41	-2.57876	0.055	0.172	6.20729e-37	MYOF	6.78549e-25	-0.710008	0.017	0.156	1.60721e-20	ODF2L	5.22e-47	0.631958	0.994	0.994	1.23641e-42	DPP7	5.31725e-69	-0.527239	0.196	0.398	1.25944e-64	HIPK2	1.68e-31	0.540191	0.882	0.762	3.99e-27	NPTXR	6.54087e-19	0.524026	0.71	0.591	1.54927e-14	TSPAN31	9.30046e-10	1.12957	0.597	0.434	2.20291e-05							Nav1	1.6172e-07
SYT6	2.86675e-41	1.11784	0.173	0.046	6.79019e-37	LIMA1	6.79751e-25	0.762446	0.911	0.883	1.61006e-20	ZCCHC24	7.44175e-47	1.61687	0.625	0.441	1.76265e-42	NLGN1	6.87796e-69	1.23406	0.259	0.108	1.62911e-64	RHEB	2.02e-31	-0.790295	0.607	0.765	4.77e-27	HECW1	7.13628e-19	0.572318	0.439	0.269	1.6903e-14	MAGEA6	9.52382e-10	-0.963967	0.072	0.238	2.25581e-05							Snrpa1	1.80309e-07
SLAIN1	3.58917e-41	1.08886	0.631	0.467	8.50131e-37	GRIA3	7.96621e-25	1.14801	0.723	0.612	1.88688e-20	IGSF21	7.80876e-47	1.60425	0.271	0.062	1.84958e-42	PHACTR3	1.31819e-68	1.4986	0.18	0.053	3.12227e-64	DDX3Y	2.17e-31	0.864577	0.524	0.284	5.15e-27	PCDHA9	7.24783e-19	0.521733	0.827	0.777	1.71672e-14	FLCN	9.69555e-10	0.773745	0.781	0.691	2.29649e-05							Kcna1	1.80524e-07
PCDHGC4	3.79925e-41	1.034	0.514	0.358	8.99891e-37	MLLT11	9.73781e-25	0.697839	0.855	0.796	2.3065e-20	GRID2	1.15508e-46	1.26254	0.437	0.193	2.73593e-42	DTNA	1.42877e-68	1.08271	0.333	0.169	3.38418e-64	PGF	4.14e-31	-2.41867	0.005	0.093	9.8e-27	SEZ6	7.48608e-19	0.707187	0.577	0.414	1.77315e-14	CTNNA2	1.00244e-09	0.746684	0.328	0.152	2.37439e-05							Psma7	1.83069e-07
TECR	4.31706e-41	-0.50854	0.71	0.85	1.02254e-36	LGR6	9.97837e-25	-1.76922	0.066	0.241	2.36348e-20	SUSD5	2.19405e-46	1.42019	0.588	0.367	5.19682e-42	HLX	2.23169e-68	-0.648272	0.094	0.262	5.28599e-64	FAM167A	5.92e-31	-0.941675	0.057	0.211	1.4e-26	ME3	9.38147e-19	0.545509	0.472	0.299	2.22209e-14	HMGB2	1.01976e-09	-0.756647	0.581	0.752	2.4154e-05							Rpl13a	1.88625e-07
DBN1	4.54585e-41	0.632246	0.794	0.687	1.07673e-36	PRDM16	1.24501e-24	-0.853471	0.097	0.278	2.94893e-20	PBXIP1	2.46804e-46	-0.71327	0.221	0.48	5.8458e-42	ARHGAP9	2.48638e-68	-1.36606	0.028	0.156	5.88924e-64	CORO1C	7.81e-31	0.675859	0.815	0.636	1.85e-26	CCNG2	1.01113e-18	0.583633	0.5	0.329	2.39497e-14	PDLIM4	1.14378e-09	-0.711392	0.103	0.283	2.70917e-05							Gm10020	1.9112e-07
S100A13	9.14447e-41	-0.86095	0.253	0.433	2.16596e-36	TCF12	1.52438e-24	0.728104	0.962	0.955	3.61065e-20	LUM	2.81709e-46	-3.31101	0.001	0.129	6.67257e-42	COL27A1	2.58205e-68	-0.602894	0.114	0.292	6.11585e-64	ST6GAL2	9.75e-31	-0.761827	0.533	0.729	2.31e-26	TRIM14	1.21944e-18	0.563012	0.578	0.438	2.88837e-14	MGST1	1.42618e-09	-0.632988	0.203	0.41	3.37806e-05							Cox4i1	1.96794e-07
GSTA4	9.3444e-41	0.836969	0.588	0.435	2.21331e-36	HEBP1	1.79888e-24	-0.594112	0.077	0.259	4.26083e-20	SOX10	6.39135e-46	0.754842	0.811	0.576	1.51385e-41	KIAA0101	3.55151e-67	-1.03144	0.424	0.572	8.41209e-63	TRIB2	1.27e-30	0.795817	0.801	0.65	3.01e-26	SYT14	1.34028e-18	0.752355	0.186	0.057	3.17459e-14	GPM6A	1.43224e-09	0.76788	0.919	0.893	3.39239e-05							Gar1	2.06911e-07
PCNA	1.23445e-40	-0.765638	0.445	0.621	2.92392e-36	ENAH	1.91092e-24	0.55303	0.991	0.99	4.52621e-20	SEMA5A	6.75085e-46	1.43791	0.758	0.607	1.59901e-41	KCNH7	1.04213e-66	0.704097	0.522	0.331	2.46839e-62	TIMP3	1.45e-30	-1.26121	0.218	0.425	3.44e-26	AIF1L	1.45149e-18	0.647492	0.689	0.559	3.438e-14	RNF38	1.44002e-09	0.836657	0.6	0.46	3.41083e-05							Stmn1	2.09301e-07
PODXL2	1.30204e-40	0.947182	0.412	0.241	3.08401e-36	TRIP6	1.92802e-24	-0.584713	0.119	0.319	4.5667e-20	ARPP21	1.35799e-45	1.09147	0.491	0.241	3.21654e-41	CLVS2	2.2855e-66	1.14753	0.226	0.085	5.41344e-62	EPN2	1.74e-30	0.782512	0.889	0.81	4.12e-26	B2M	1.63777e-18	-0.720215	0.917	0.93	3.87923e-14	DDX17	1.44283e-09	0.546173	0.988	0.972	3.4175e-05							Rps8	2.22909e-07
KIF5A	1.33424e-40	1.00481	0.442	0.273	3.16028e-36	GPR124	2.23133e-24	-1.10599	0.059	0.225	5.28512e-20	CHGB	1.90132e-45	1.25251	0.508	0.26	4.50348e-41	PRKCB	3.78058e-66	1.48029	0.141	0.033	8.95468e-62	SERPINA3	2.27e-30	-1.70771	0.023	0.14	5.38e-26	CYTH1	1.93259e-18	0.503801	0.756	0.615	4.57753e-14	NUF2	1.45966e-09	-0.543602	0.134	0.324	3.45736e-05							Rpl27	2.3167e-07
C1R	1.596e-40	-0.863319	0.195	0.368	3.78029e-36	RTN3	2.56095e-24	0.600398	0.962	0.968	6.06587e-20	GPR37L1	1.9619e-45	2.31744	0.711	0.612	4.64696e-41	TIAM1	9.37244e-66	1.09635	0.357	0.191	2.21996e-61	TRIL	3.12e-30	-1.12451	0.166	0.369	7.38e-26	HAPLN1	2.05172e-18	0.688793	0.465	0.292	4.8597e-14	CNPY1	1.53172e-09	0.828217	0.266	0.109	3.62802e-05							Tomm20	2.34255e-07
SEMA5A	2.15786e-40	0.730978	0.815	0.74	5.11111e-36	BEX1	5.32937e-24	0.569248	0.862	0.745	1.26231e-19	GLUL	2.50508e-45	-0.816059	0.839	0.92	5.93352e-41	PAK7	1.17732e-65	1.4273	0.192	0.064	2.78861e-61	RARRES3	3.26e-30	-1.5866	0.023	0.14	7.71e-26	GCA	2.16283e-18	-0.67018	0.014	0.069	5.12287e-14	CRTC3	1.57907e-09	0.798433	0.494	0.31	3.74018e-05							Mif	2.40038e-07
TRAF4	2.49559e-40	0.814764	0.65	0.505	5.91106e-36	APC2	6.7585e-24	0.543101	0.551	0.367	1.60082e-19	GRIK3	3.06272e-45	1.06018	0.672	0.463	7.25435e-41	USP2	3.84198e-65	-0.552629	0.213	0.423	9.10011e-61	PFN2	1.01e-29	-0.65766	0.828	0.874	2.39e-25	NHSL1	2.42519e-18	-0.685045	0.174	0.308	5.7443e-14	TMEM144	1.58884e-09	1.35406	0.312	0.152	3.76332e-05							Fam195b	2.45176e-07
GPC2	3.75765e-40	0.960449	0.406	0.239	8.90037e-36	CACNG4	8.32086e-24	1.1213	0.565	0.364	1.97088e-19	ARHGEF26-AS1	4.53736e-45	0.617102	0.979	0.966	1.07472e-40	MAML3	6.35924e-65	0.739638	0.682	0.548	1.50625e-60	THSD4	1.05e-29	-0.789042	0.052	0.196	2.48e-25	ADAMTS19	2.70293e-18	0.655331	0.18	0.055	6.40216e-14	MORF4L1	1.60359e-09	0.679307	0.891	0.919	3.79826e-05							Sdhb	2.65849e-07
COL11A1	8.86927e-40	0.755359	0.237	0.094	2.10078e-35	SLITRK6	9.96293e-24	-2.009	0.009	0.133	2.35982e-19	SHFM1	5.34264e-45	-0.56437	0.697	0.882	1.26546e-40	CDCA7	1.10459e-64	-0.537864	0.163	0.351	2.61633e-60	FZD3	1.15e-29	0.679309	0.924	0.901	2.73e-25	SYNE2	2.7128e-18	0.535187	0.851	0.749	6.42554e-14	SPAG9	1.62126e-09	0.624924	0.938	0.897	3.84012e-05							Ppp2cb	2.72469e-07
TMEM194A	1.64835e-39	-0.555309	0.277	0.456	3.90429e-35	RIN1	1.05475e-23	-0.906522	0.031	0.179	2.49829e-19	ANXA5	6.19035e-45	-0.62754	0.779	0.903	1.46625e-40	MCF2L	2.07997e-64	0.719068	0.295	0.139	4.92661e-60	GPC6	1.25e-29	-0.717316	0.099	0.272	2.97e-25	PIK3R3	2.9005e-18	0.653825	0.551	0.399	6.87011e-14	TIMM50	1.81784e-09	-0.500656	0.644	0.79	4.30573e-05							Actg1	2.87482e-07
ANK3	2.32356e-39	0.845812	0.374	0.209	5.50358e-35	EPHB1	1.10374e-23	0.866169	0.558	0.344	2.61432e-19	RAB13	8.16165e-45	-0.903003	0.289	0.544	1.93317e-40	RAMP1	2.69998e-64	-1.00668	0.042	0.177	6.39517e-60	2021-03-01	1.34e-29	0.786229	0.539	0.305	3.17e-25	NEK6	3.14959e-18	-0.650063	0.274	0.422	7.46011e-14	RAPSN	1.83736e-09	-1.281	0.041	0.183	4.35197e-05							Nrxn3	3.03304e-07
ASIC1	2.38992e-39	0.850021	0.339	0.173	5.66077e-35	ZFP36L2	1.18009e-23	-0.888387	0.411	0.647	2.79516e-19	AHNAK	2.27626e-44	-1.49597	0.099	0.304	5.39155e-40	SATB2	2.98401e-64	1.57163	0.171	0.053	7.06792e-60	NRCAM	1.41e-29	0.725941	0.89	0.796	3.34e-25	MGST1	4.97674e-18	-1.38684	0.017	0.073	1.17879e-13	ZNF704	1.99671e-09	0.852489	0.731	0.603	4.72941e-05							Ccdc34	3.20759e-07
ZEB2	6.79724e-39	0.712564	0.839	0.766	1.60999e-34	CSDA	1.27153e-23	-0.659698	0.147	0.357	3.01175e-19	LGALS3BP	2.43513e-44	-0.673919	0.491	0.742	5.76784e-40	CSNK1E	5.4339e-64	0.810849	0.797	0.762	1.28707e-59	FABP7	1.73e-29	0.6336	0.626	0.392	4.09e-25	DND1	7.07623e-18	0.756224	0.578	0.439	1.67607e-13	TMEM108	2.01801e-09	1.13263	0.428	0.25	4.77985e-05							Rpl27-ps3	3.52433e-07
THSD7A	7.03736e-39	1.02345	0.514	0.354	1.66687e-34	SCN3A	1.35123e-23	0.86582	0.69	0.52	3.20051e-19	SYPL1	2.53919e-44	-0.922931	0.308	0.566	6.01433e-40	SDK2	7.46422e-64	-0.655374	0.185	0.365	1.76798e-59	HLA-C	2e-29	-1.02496	0.626	0.765	4.75e-25	PTPRN2	8.60947e-18	0.539097	0.658	0.522	2.03924e-13	CYYR1	2.14859e-09	0.746653	0.3	0.133	5.08914e-05							Pkm	4.16439e-07
NAV1	1.21853e-38	0.588064	0.822	0.713	2.88621e-34	SLC7A3	1.50318e-23	-1.65276	0.082	0.254	3.56042e-19	GPR123	2.79555e-44	1.1586	0.326	0.102	6.62155e-40	ROBO2	1.11444e-63	1.72484	0.348	0.2	2.63967e-59	CHST9	2.2e-29	-0.768326	0.164	0.369	5.21e-25	SMPD3	1.18735e-17	0.645382	0.455	0.306	2.81235e-13	MTSS1	2.19738e-09	0.844328	0.569	0.419	5.20472e-05							Polr2i	4.1729e-07
C10orf10	1.28199e-38	-1.66718	0.079	0.204	3.03652e-34	ARHGAP29	1.57298e-23	-0.673808	0.059	0.227	3.72576e-19	HSPB3	3.32533e-44	-1.87618	0.023	0.179	7.87638e-40	CTNNA2	1.70688e-63	1.41626	0.259	0.113	4.04293e-59	GPR75	3.22e-29	-0.939176	0.251	0.463	7.62e-25	SLC4A4	1.20454e-17	-1.03552	0.026	0.09	2.85307e-13	SLC22A17	2.25814e-09	0.810421	0.362	0.19	5.34862e-05							Sema3d	4.25201e-07
IL1RAPL1	1.48489e-38	1.22203	0.168	0.047	3.5171e-34	MEIS1	1.74196e-23	-0.889381	0.354	0.57	4.12601e-19	SHC1	4.02219e-44	-1.60059	0.448	0.673	9.52697e-40	SETBP1	2.51271e-63	0.576946	0.765	0.642	5.95161e-59	SLC2A13	3.94e-29	0.551702	0.578	0.341	9.33e-25	TMX4	1.25904e-17	0.714333	0.612	0.473	2.98216e-13	RFX3	2.33139e-09	1.30761	0.475	0.312	5.52213e-05							Spry2	4.26398e-07
FGF9	1.61834e-38	0.921433	0.193	0.064	3.8332e-34	ZEB1	1.7746e-23	0.740025	0.84	0.774	4.20331e-19	GAD1	4.09519e-44	1.92603	0.359	0.137	9.69986e-40	KIF1A	6.30852e-63	0.932213	0.477	0.312	1.49423e-58	C15orf39	4.02e-29	-0.754293	0.194	0.406	9.51e-25	SVOP	1.26302e-17	1.06563	0.495	0.386	2.9916e-13	KIF5A	2.38934e-09	1.19568	0.4	0.224	5.65938e-05							Ank2	4.35831e-07
SOX2-OT	1.69546e-38	0.50494	0.916	0.85	4.01587e-34	CALB1	1.7783e-23	-1.66231	0.027	0.169	4.21207e-19	CSMD3	5.47386e-44	0.989674	0.492	0.242	1.29654e-39	TCF4	1.63204e-62	0.846482	0.737	0.643	3.86566e-58	GABRA3	4.43e-29	0.80578	0.604	0.401	1.05e-24	GULP1	1.47301e-17	-0.65911	0.077	0.176	3.48898e-13	TK1	2.40817e-09	-0.693055	0.162	0.347	5.704e-05							Cnih4	4.61835e-07
SOX8	1.88948e-38	1.14504	0.52	0.369	4.47541e-34	SERPINF1	1.86162e-23	-1.10387	0.04	0.19	4.40944e-19	GPR56	6.22742e-44	0.599099	0.953	0.876	1.47503e-39	FHL1	2.13497e-62	1.0485	0.482	0.324	5.05688e-58	GRIA3	4.5e-29	0.774865	0.772	0.607	1.07e-24	MT1X	1.64646e-17	-1.65131	0.293	0.427	3.89981e-13	CCNB1	2.44838e-09	-0.890785	0.162	0.347	5.79924e-05							Ndufb6	4.88194e-07
TUBB3	1.99445e-38	0.793618	0.767	0.672	4.72404e-34	TGIF2	1.93807e-23	-1.23813	0.181	0.377	4.59052e-19	SELENBP1	7.4288e-44	-2.50383	0.029	0.185	1.75959e-39	LAPTM4B	3.64801e-62	-0.649837	0.313	0.504	8.64069e-58	CYCS	5.16e-29	-0.766812	0.925	0.959	1.22e-24	S100A10	2.71606e-17	-1.07716	0.034	0.106	6.43326e-13	SETBP1	2.60101e-09	0.788956	0.697	0.588	6.16074e-05							Rps26-ps1	8.35043e-29
TNK2	3.78355e-38	0.902313	0.56	0.412	8.96172e-34	OPCML	2.01252e-23	0.952025	0.53	0.327	4.76685e-19	CELSR3	9.31243e-44	1.00405	0.424	0.195	2.20574e-39	THEM6	4.48592e-62	-0.606862	0.112	0.279	1.06254e-57	SLITRK3	5.92e-29	0.618447	0.429	0.188	1.4e-24	C3orf58	2.90404e-17	-0.652235	0.152	0.279	6.87851e-13	SOX11	2.73061e-09	0.730593	0.922	0.929	6.46771e-05							Gm8730	2.74839e-28
INA	6.72602e-38	1.51675	0.197	0.069	1.59312e-33	FN1	2.23857e-23	-4.558	0.226	0.421	5.30227e-19	PYCR2	1.03601e-43	-0.907686	0.488	0.744	2.45389e-39	CCDC136	5.98022e-62	1.08646	0.247	0.106	1.41647e-57	RHOB	7.66e-29	-1.08343	0.404	0.625	1.81e-24	CDK2	3.5265e-17	-0.839303	0.098	0.204	8.35286e-13	GSTA4	2.97302e-09	1.18373	0.669	0.588	7.0419e-05							2700094K13Rik	2.87325e-23
CDKN3	8.69718e-38	-1.18935	0.087	0.216	2.06001e-33	MT2A	2.75066e-23	-1.35239	0.407	0.65	6.5152e-19	MMP16	1.92446e-43	1.07401	0.761	0.596	4.55828e-39	APCDD1L-AS1	2.15288e-61	-0.593593	0.026	0.143	5.09932e-57	SPDYE5	1.52e-28	-0.617146	0.903	0.939	3.6e-24	ALDH6A1	3.73168e-17	-0.640526	0.561	0.682	8.83885e-13	PKMYT1	3.13605e-09	-0.72814	0.134	0.314	7.42805e-05							Gm10123	1.86819e-22
KIF3C	1.25007e-37	0.879152	0.487	0.328	2.96092e-33	SQSTM1	3.14845e-23	-0.785315	0.53	0.744	7.45742e-19	BAI1	5.27493e-43	0.878871	0.363	0.142	1.24942e-38	STOM	2.46981e-61	-1.11598	0.553	0.708	5.84998e-57	TPP1	2.08e-28	-0.787546	0.527	0.729	4.94e-24	CYR61	3.84129e-17	-1.33275	0.077	0.175	9.09847e-13	MTFP1	3.13684e-09	-0.791572	0.234	0.421	7.42993e-05							Rpsa-ps10	4.1459e-19
CD24	1.53706e-37	1.13285	0.762	0.693	3.64068e-33	AKR1C3	3.23825e-23	-1.92619	0.027	0.166	7.67012e-19	CDK18	6.71315e-43	-1.72402	0.147	0.357	1.59008e-38	FNBP1L	3.41872e-61	0.899091	0.78	0.704	8.09759e-57	PAK1	2.34e-28	-1.06982	0.073	0.228	5.53e-24	PKIA	4.08722e-17	0.543116	0.618	0.448	9.68098e-13	FAM84A	3.16387e-09	1.13713	0.444	0.279	7.49395e-05							2810417H13Rik	3.36194e-13
KCND2	1.92538e-37	1.15381	0.294	0.145	4.56045e-33	BSCL2	3.42988e-23	-0.545197	0.488	0.696	8.12402e-19	DNM3	1.06643e-42	0.723434	0.86	0.69	2.52596e-38	VSTM4	4.88034e-61	0.854458	0.838	0.79	1.15596e-56	GAP43	2.38e-28	0.58772	0.609	0.378	5.63e-24	TIAM2	4.2735e-17	1.41032	0.26	0.129	1.01222e-12	PTTG1	3.1844e-09	-0.851021	0.288	0.495	7.54257e-05							Gm6472	1.54266e-11
RBFOX2	2.13513e-37	0.730555	0.671	0.536	5.05726e-33	HNMT	3.65566e-23	-1.48857	0.083	0.253	8.65881e-19	NKAIN4	1.81543e-42	0.830553	0.77	0.56	4.30003e-38	CD24	1.31867e-60	0.596328	0.923	0.895	3.12341e-56	EYA1	2.85e-28	0.79875	0.546	0.302	6.76e-24	RUFY2	4.76166e-17	0.605586	0.747	0.654	1.12785e-12	GPR85	3.30958e-09	1.32274	0.297	0.134	7.83908e-05							Rps3a2	3.89929e-11
KIDINS220	5.24044e-37	0.751489	0.771	0.672	1.24125e-32	SLC35F1	3.98018e-23	0.992762	0.937	0.905	9.42746e-19	VIPR2	1.89758e-42	0.704424	0.662	0.461	4.4946e-38	RTN3	2.05218e-60	0.501929	0.938	0.952	4.8608e-56	PDLIM5	2.86e-28	0.62534	0.98	0.971	6.77e-24	SYTL4	5.79781e-17	-0.939878	0.214	0.34	1.37327e-12	USP22	3.56671e-09	0.655925	0.928	0.945	8.44812e-05							Gm6139	9.03363e-11
CSRNP3	1.28757e-36	0.930126	0.496	0.344	3.04973e-32	TNFRSF1A	4.21669e-23	-0.794779	0.249	0.469	9.98765e-19	HECW1	2.01879e-42	1.04294	0.347	0.127	4.7817e-38	IL17RD	2.07561e-60	0.624249	0.881	0.847	4.91629e-56	APBB2	2.9e-28	0.58013	0.792	0.653	6.86e-24	CDK5R1	5.85984e-17	0.540233	0.612	0.457	1.38796e-12	CXorf57	3.85011e-09	1.19799	0.216	0.081	9.11936e-05							Rps3a3	6.56777e-10
PAK7	1.46652e-36	1.07003	0.155	0.042	3.47359e-32	MT1F	5.58609e-23	-0.554313	0.094	0.283	1.32312e-18	LDHA	2.10537e-42	-0.643674	0.768	0.914	4.98677e-38	CLIP2	2.31087e-60	0.881555	0.302	0.152	5.47352e-56	PPFIA2	3.03e-28	0.55371	0.624	0.389	7.19e-24	C11orf75	8.00625e-17	-1.12234	0.017	0.07	1.89636e-12	CPSF3	3.87356e-09	-0.539072	0.419	0.626	9.17492e-05							Gm5428	2.64261e-09
MGST1	1.54864e-36	-1.47029	0.045	0.148	3.6681e-32	DNAH9	5.96974e-23	-0.776596	0.119	0.308	1.41399e-18	DOCK10	3.71424e-42	0.881608	0.857	0.73	8.79756e-38	IRGQ	7.54059e-60	0.549589	0.988	0.983	1.78607e-55	MTSS1	4.37e-28	0.624668	0.789	0.598	1.03e-23	PTPRK	8.63858e-17	0.727118	0.602	0.501	2.04614e-12	TROAP	4.05056e-09	-0.93369	0.125	0.297	9.59415e-05							Nhp2l1	3.75119e-09
CTSL1	1.79372e-36	-0.572823	0.391	0.582	4.2486e-32	GCA	5.97428e-23	-0.584033	0.112	0.3	1.41507e-18	NPIP	4.48356e-42	0.74208	0.868	0.866	1.06198e-37	RGMB	1.1049e-59	1.89075	0.545	0.414	2.61706e-55	PCDHGB7	5.19e-28	-0.872831	0.328	0.542	1.23e-23	CYBRD1	1.16659e-16	-1.00738	0.04	0.113	2.7632e-12	KIF21A	4.23891e-09	1.00075	0.534	0.381	0.000100403							Shfm1	1.84677e-08
GBP2	1.94198e-36	-1.85568	0.047	0.15	4.59977e-32	PCDHGB6	6.94869e-23	-1.05502	0.069	0.235	1.64587e-18	EIF4A2	4.79868e-42	0.592916	0.934	0.928	1.13662e-37	LEPR	1.24495e-59	0.6267	0.825	0.768	2.9488e-55	GRAMD3	5.38e-28	-0.76637	0.441	0.662	1.27e-23	SYP	1.19527e-16	0.591026	0.612	0.483	2.83112e-12	FAM49A	4.45922e-09	1.25159	0.25	0.107	0.000105621							Rps10-ps1	3.44033e-08
PCDH11X	3.24462e-36	1.5644	0.852	0.819	7.6852e-32	HSPA5	7.15315e-23	-0.679109	0.864	0.939	1.6943e-18	DNER	4.88454e-42	0.913355	0.726	0.505	1.15695e-37	ASS1	1.41961e-59	-0.572436	0.305	0.507	3.36248e-55	LRP6	5.4e-28	0.628002	0.573	0.344	1.28e-23	IFI44L	1.29614e-16	-0.884771	0.037	0.108	3.07004e-12	MOK	4.5286e-09	-0.731286	0.172	0.35	0.000107264
DDX39A	4.08475e-36	-0.61898	0.571	0.718	9.67514e-32	PLOD2	7.24261e-23	-0.658074	0.38	0.608	1.71548e-18	PSPH	5.8094e-42	-0.580903	0.755	0.858	1.37602e-37	BIRC5	1.55919e-59	-1.27221	0.089	0.236	3.6931e-55	RBP1	6.46e-28	-1.23058	0.255	0.454	1.53e-23	ZFPM2	1.51169e-16	0.771287	0.248	0.113	3.58059e-12	NOVA1	4.73544e-09	1.14275	0.456	0.3	0.000112164
SHD	8.43204e-36	0.776182	0.338	0.178	1.99721e-31	NLGN4X	7.28898e-23	0.881563	0.784	0.722	1.72647e-18	MEGF11	7.34411e-42	1.1855	0.669	0.48	1.73953e-37	MCM3	1.68433e-59	-0.690686	0.272	0.459	3.98951e-55	PMP2	1.11e-27	-0.516501	0.766	0.892	2.62e-23	KLRC4-KLRK1	1.98096e-16	1.26055	0.246	0.115	4.6921e-12	MGAT4C	4.74281e-09	1.20469	0.2	0.072	0.000112338
SLC22A17	1.13925e-35	0.680188	0.591	0.444	2.69843e-31	C6orf120	1.02306e-22	-0.646628	0.169	0.377	2.42322e-18	EFS	8.23399e-42	1.00663	0.392	0.159	1.9503e-37	CXADR	3.52122e-59	0.65124	0.891	0.864	8.34036e-55	HIST1H2AC	1.11e-27	-1.16807	0.11	0.281	2.63e-23	APBA2	2.05863e-16	0.597395	0.868	0.828	4.87608e-12	KCNH7	4.96546e-09	1.26003	0.262	0.112	0.000117612
ABCG1	1.2423e-35	1.25439	0.213	0.083	2.94251e-31	CPNE5	1.04312e-22	-1.41231	0.133	0.318	2.47074e-18	BEX1	8.40961e-42	0.635663	0.834	0.638	1.9919e-37	ATP6V0E2	1.73406e-58	0.893632	0.635	0.536	4.1073e-54	WSCD1	1.13e-27	0.667273	0.588	0.373	2.68e-23	LHFP	2.91755e-16	-1.75827	0.028	0.092	6.9105e-12	IL17RD	5.52844e-09	0.516712	0.825	0.8	0.000130947
2022-03-01	1.29223e-35	0.85817	0.352	0.193	3.06078e-31	TIMP1	1.06079e-22	-2.60798	0.373	0.602	2.51259e-18	COL15A1	1.27258e-41	-1.41269	0.021	0.164	3.01422e-37	CDCA7L	1.95928e-58	-0.540393	0.123	0.284	4.64076e-54	SOX6	1.39e-27	0.542579	0.843	0.678	3.29e-23	TTYH1	3.24718e-16	-0.658765	0.639	0.758	7.69127e-12	PRL	5.72744e-09	-0.599324	0.116	0.29	0.00013566
DYNLT3	1.78222e-35	-0.703896	0.188	0.348	4.22136e-31	HPGD	1.07801e-22	-2.41409	0.006	0.12	2.55337e-18	PLS3	2.78386e-41	-1.54658	0.04	0.206	6.59386e-37	SV2B	2.8122e-58	0.838945	0.698	0.598	6.66097e-54	FCHSD2	1.46e-27	0.70632	0.783	0.609	3.46e-23	DTNA	3.98639e-16	-0.674019	0.555	0.683	9.44217e-12	FLNA	6.00994e-09	0.929133	0.672	0.548	0.000142352
TENM1	1.84385e-35	0.70491	0.608	0.452	4.36734e-31	SLC3A2	1.15254e-22	-0.671856	0.691	0.879	2.72992e-18	REC8	3.69375e-41	0.878594	0.561	0.309	8.74902e-37	STXBP5L	8.72803e-58	1.1539	0.441	0.291	2.06732e-53	TBC1D14	1.52e-27	0.786155	0.526	0.314	3.59e-23	BBOX1	4.44906e-16	-1.45755	0.041	0.113	1.0538e-11	RUFY3	6.11956e-09	0.765085	0.794	0.781	0.000144948
ITPKB	2.04187e-35	-0.506478	0.124	0.267	4.83637e-31	ATF3	1.15433e-22	-1.55328	0.277	0.498	2.73415e-18	NID1	5.79876e-41	-0.61036	0.209	0.441	1.37349e-36	IDS	1.47309e-57	0.921182	0.859	0.804	3.48917e-53	DSCAML1	1.54e-27	0.56226	0.737	0.531	3.65e-23	ATP8A1	4.50691e-16	0.532022	0.547	0.414	1.06751e-11	NCAM2	6.17139e-09	0.648641	0.162	0.05	0.000146176
S100A6	2.12474e-35	-0.655914	0.593	0.737	5.03265e-31	CPXM2	1.24894e-22	-1.21875	0.001	0.109	2.95824e-18	SCN2A	5.87268e-41	1.22976	0.507	0.267	1.391e-36	NBPF1	1.68881e-57	0.916251	0.673	0.591	4.00011e-53	NLGN4X	3.25e-27	0.911732	0.548	0.341	7.7e-23	HMGB2	6.70991e-16	-1.49733	0.216	0.344	1.58931e-11	SESN3	6.39492e-09	0.539033	0.369	0.205	0.00015147
MDGA2	3.08407e-35	0.774814	0.15	0.04	7.30494e-31	VAMP5	1.44332e-22	-1.28049	0.041	0.19	3.41865e-18	CLASP2	7.66867e-41	0.892536	0.844	0.749	1.8164e-36	MLLT4	1.9449e-57	0.781525	0.575	0.425	4.60669e-53	KIAA1244	3.54e-27	0.564128	0.826	0.707	8.38e-23	GPC4	8.62467e-16	-0.827164	0.012	0.059	2.04284e-11	PRKAG2-AS1	6.54226e-09	0.89586	0.231	0.093	0.00015496
CELF3	4.44803e-35	0.58884	0.327	0.176	1.05356e-30	NRXN1	1.48273e-22	0.842424	0.591	0.414	3.51199e-18	HMGN3	8.791e-41	-0.536074	0.668	0.86	2.08224e-36	FCGRT	3.38081e-57	-0.774738	0.131	0.29	8.00778e-53	ADCYAP1R1	4.89e-27	-0.856102	0.613	0.737	1.16e-22	C20orf112	1.7318e-15	0.555349	0.721	0.597	4.10195e-11	RHOB	7.2388e-09	1.03805	0.475	0.309	0.000171458
TMEM59L	4.84127e-35	0.516762	0.732	0.603	1.1467e-30	IL17RC	1.5832e-22	-0.875532	0.08	0.255	3.74996e-18	TAGLN2	1.11427e-40	-1.05035	0.519	0.736	2.63925e-36	CAMK4	5.3192e-57	1.86168	0.256	0.121	1.25991e-52	ID4	5.87e-27	-0.946094	0.094	0.258	1.39e-22	BAG3	1.89611e-15	-0.768346	0.045	0.118	4.49112e-11	FGF14	7.64028e-09	1.14075	0.256	0.112	0.000180968
MAGI1	5.20438e-35	0.735655	0.682	0.558	1.23271e-30	PTRF	1.72742e-22	-1.19919	0.192	0.377	4.09157e-18	INA	1.13783e-40	1.88233	0.27	0.075	2.69506e-36	CEND1	5.39061e-57	1.24817	0.187	0.069	1.27682e-52	PRKACB	7.27e-27	0.838982	0.593	0.394	1.72e-22	CHRNB2	2.7157e-15	0.651854	0.323	0.185	6.43241e-11	ITGA7	7.89265e-09	0.976897	0.209	0.081	0.000186945
TAOK3	6.25558e-35	0.802024	0.804	0.731	1.4817e-30	SEMA3A	1.85912e-22	-1.17494	0.154	0.339	4.40351e-18	FAIM2	1.34271e-40	0.826903	0.631	0.41	3.18035e-36	ZWINT	5.84917e-57	-0.796442	0.097	0.248	1.38543e-52	GALNT13	8.12e-27	0.586983	0.711	0.518	1.92e-22	PMP22	3.19564e-15	-1.21112	0.054	0.131	7.5692e-11	AIMP1	8.07288e-09	-1.53859	0.531	0.717	0.000191214
SNAP91	6.56831e-35	1.20468	0.132	0.031	1.55577e-30	COL8A1	2.10939e-22	-1.87609	0.006	0.119	4.99631e-18	CHL1	1.43933e-40	2.00565	0.478	0.279	3.4092e-36	PCNA	6.88738e-57	-0.62944	0.363	0.565	1.63134e-52	ALDOA	8.14e-27	-0.558857	0.882	0.917	1.93e-22	CBS	3.64412e-15	-0.51178	0.595	0.718	8.63147e-11	SOX2	8.2247e-09	0.58032	0.238	0.097	0.00019481
ASCL1	8.91308e-35	0.702756	0.634	0.487	2.11115e-30	CYR61	2.23315e-22	-0.942914	0.365	0.59	5.28943e-18	NUPR1	1.53473e-40	-1.39872	0.043	0.207	3.63517e-36	IFITM3	1.1501e-56	-1.29841	0.099	0.245	2.72413e-52	ZEB1	1.19e-26	0.604564	0.829	0.692	2.81e-22	HEY2	3.90418e-15	-0.849549	0.028	0.089	9.24743e-11	LYAR	8.34763e-09	-0.565838	0.262	0.466	0.000197722
MRPL51	1.00514e-34	-0.621677	0.628	0.768	2.38077e-30	ITGB4	2.31457e-22	-0.835381	0.092	0.271	5.48228e-18	LPPR1	1.57026e-40	1.15309	0.611	0.39	3.71932e-36	MLLT11	2.08747e-56	0.628297	0.837	0.8	4.94438e-52	SPON1	1.31e-26	-0.787162	0.274	0.478	3.09e-22	CD99	3.91486e-15	-1.96482	0.112	0.211	9.27274e-11	TUBA4A	8.51001e-09	-1.11469	0.103	0.266	0.000201568
CSDA	1.01688e-34	-0.753268	0.256	0.42	2.40859e-30	MT1M	2.4925e-22	-1.30357	0.054	0.211	5.90373e-18	PEG3	1.96289e-40	0.902522	0.627	0.398	4.64931e-36	EPCAM	2.76004e-56	-1.76114	0.022	0.127	6.53744e-52	SPDYE2	1.45e-26	-0.591163	0.787	0.884	3.44e-22	SPARC	4.25385e-15	-1.78505	0.394	0.516	1.00757e-10	GAB1	8.61278e-09	1.12955	0.381	0.222	0.000204002
UXT	1.0611e-34	-0.745556	0.447	0.611	2.51332e-30	MT1X	2.82044e-22	-1.73962	0.179	0.391	6.68049e-18	CFH	3.07289e-40	-3.34457	0.018	0.153	7.27846e-36	CACNA2D4	3.6245e-56	-0.542271	0.113	0.268	8.58498e-52	SPDYE2L	1.45e-26	-0.591163	0.787	0.884	3.44e-22	CPEB3	4.54199e-15	0.538753	0.512	0.367	1.07582e-10	NUPR1	8.74698e-09	0.960631	0.259	0.112	0.000207181
PCDHGB2	1.08432e-34	0.892558	0.528	0.385	2.56832e-30	LHFPL3	3.12639e-22	1.01267	0.702	0.528	7.40518e-18	SLC4A10	4.23278e-40	1.48953	0.262	0.069	1.00258e-35	TMEM130	3.98704e-56	1.52465	0.555	0.441	9.44371e-52	PLEKHB1	1.47e-26	-0.753998	0.518	0.686	3.49e-22	STEAP4	5.26065e-15	0.681264	0.355	0.227	1.24604e-10	SGCZ	9.13703e-09	1.26466	0.141	0.038	0.00021642
MT2A	1.10997e-34	-0.782973	0.632	0.781	2.62908e-30	DDR2	3.28151e-22	-0.936	0.108	0.287	7.77259e-18	UNC79	5.06154e-40	0.80164	0.372	0.148	1.19888e-35	DCLK1	6.95316e-56	0.992956	0.364	0.21	1.64693e-51	CDC42EP4	1.8e-26	-1.01916	0.285	0.487	4.26e-22	CEBPB	5.47316e-15	-0.83337	0.012	0.056	1.29637e-10	DHFR	9.25709e-09	-0.529632	0.366	0.547	0.000219263
SPAG9	3.47719e-34	0.601414	0.97	0.949	8.23607e-30	SRSF6	4.71044e-22	1.05006	0.948	0.975	1.11572e-17	SOX6	5.7641e-40	0.688536	0.927	0.848	1.36528e-35	GNG11	7.03955e-56	-0.823629	0.109	0.262	1.66739e-51	CACNA1E	1.9e-26	0.53728	0.556	0.326	4.5e-22	CD27-AS1	6.30616e-15	0.541259	0.624	0.501	1.49368e-10	SPESP1	9.92253e-09	-0.602821	0.034	0.166	0.000235025
TMEM132B	3.89971e-34	0.767036	0.343	0.189	9.23685e-30	TGFB3	5.9417e-22	-0.691795	0.082	0.254	1.40735e-17	MAGI1	5.81274e-40	0.990723	0.64	0.448	1.37681e-35	MAD2L1	7.68846e-56	-0.761895	0.156	0.322	1.82109e-51	KIF13A	2.23e-26	0.953713	0.544	0.338	5.29e-22	CD200	6.39773e-15	0.525247	0.482	0.334	1.51537e-10	ADRBK2	1.02198e-08	0.862972	0.772	0.669	0.000242067
PTPRD	5.84583e-34	0.862615	0.522	0.362	1.38464e-29	PVRL3	6.32501e-22	-0.734319	0.066	0.227	1.49814e-17	C3orf70	6.45923e-40	1.09679	0.828	0.711	1.52993e-35	HHIP	7.73995e-56	1.19396	0.202	0.079	1.83328e-51	SCARA3	2.55e-26	-0.862771	0.157	0.341	6.05e-22	TEK	7.44755e-15	1.11958	0.192	0.078	1.76403e-10	IQGAP2	1.04821e-08	-0.647371	0.031	0.155	0.000248278
ASTN1	6.14372e-34	0.568859	0.677	0.527	1.4552e-29	LSP1	6.36489e-22	-2.93601	0.016	0.139	1.50759e-17	ZMIZ1	9.38833e-40	0.813802	0.779	0.611	2.22372e-35	TULP1	8.43396e-56	-1.03556	0.063	0.195	1.99767e-51	ZNF462	3.11e-26	0.57088	0.866	0.729	7.36e-22	RPE65	7.97605e-15	-0.740821	0.003	0.031	1.88921e-10	HOXA7	1.06786e-08	1.26625	0.344	0.195	0.000252934
GLUL	6.20344e-34	-1.17296	0.864	0.924	1.46935e-29	SLC40A1	7.31578e-22	-1.02152	0.057	0.211	1.73282e-17	COL9A2	1.03987e-39	0.753787	0.538	0.283	2.46304e-35	ZNF483	8.82152e-56	0.633336	0.856	0.815	2.08946e-51	LPL	3.13e-26	-0.859765	0.116	0.284	7.4e-22	SAPCD2	8.40196e-15	0.564292	0.586	0.46	1.99009e-10	CCNF	1.09292e-08	-0.839649	0.225	0.41	0.000258869
PKIA	6.41823e-34	0.985148	0.447	0.29	1.52022e-29	PCDH18	8.74041e-22	-0.959598	0.054	0.207	2.07025e-17	TCF12	1.05625e-39	0.852788	0.914	0.915	2.50183e-35	GAB1	2.61418e-55	1.38741	0.343	0.202	6.19195e-51	ITPKB	4.05e-26	-0.658268	0.098	0.26	9.59e-22	AP3B2	1.01319e-14	0.530686	0.554	0.411	2.39985e-10	HOXA9	1.18238e-08	1.32037	0.378	0.234	0.000280059
FSCN1	7.97146e-34	0.501064	0.914	0.83	1.88812e-29	INPP4B	9.36222e-22	-0.656045	0.03	0.168	2.21754e-17	COX7A2	1.27415e-39	-0.507185	0.783	0.904	3.01795e-35	NAV1	3.11531e-55	0.826625	0.606	0.479	7.37892e-51	ID1	4.26e-26	-0.752942	0.315	0.523	1.01e-21	PBK	1.12312e-14	-1.8334	0.02	0.073	2.66022e-10	ANKRD6	1.26536e-08	1.02202	0.359	0.193	0.000299713
NDRG1	1.00449e-33	-2.24781	0.182	0.313	2.37923e-29	ABCA6	9.59796e-22	-0.949334	0.005	0.113	2.27337e-17	NRXN2	1.67839e-39	0.720847	0.532	0.315	3.97543e-35	TUBB4B	5.63606e-55	-0.624224	0.746	0.879	1.33496e-50	ACSL6	4.75e-26	-0.686015	0.79	0.891	1.13e-21	RAB13	1.15553e-14	-0.701445	0.277	0.405	2.73698e-10	BTG2	1.27353e-08	1.24841	0.666	0.55	0.000301649
NFKBIA	1.01279e-33	-1.2703	0.428	0.59	2.39889e-29	MYLIP	9.97381e-22	-0.560106	0.184	0.387	2.3624e-17	TMPRSS9	2.85442e-39	2.13823	0.257	0.069	6.76097e-35	ASTN1	5.75442e-55	1.1367	0.269	0.13	1.36299e-50	SHD	5.03e-26	0.503933	0.671	0.441	1.19e-21	ARHGEF6	1.21365e-14	-1.1641	0.402	0.534	2.87465e-10	BEX1	1.2779e-08	0.56852	0.9	0.947	0.000302683
LUZP2	1.41237e-33	1.08684	0.461	0.328	3.34534e-29	UGT8	1.14369e-21	0.815912	0.985	0.979	2.70896e-17	LINC00689	3.0799e-39	1.23383	0.376	0.161	7.29506e-35	TAP1	6.92982e-55	-0.564438	0.044	0.166	1.6414e-50	PCDHGB1	5.57e-26	1.20423	0.332	0.135	1.32e-21	ABCA8	1.57723e-14	-0.979109	0.009	0.048	3.73584e-10	PAGE5	1.2909e-08	-1.64667	0.016	0.129	0.000305762
C1QL1	1.49447e-33	0.655115	0.183	0.066	3.53981e-29	RNF220	1.20356e-21	-0.961619	0.388	0.58	2.85074e-17	MAB21L3	3.38167e-39	0.596779	0.951	0.946	8.00982e-35	LOC442132	8.54074e-55	1.03066	0.29	0.152	2.02296e-50	GLI3	5.72e-26	-0.505598	0.028	0.137	1.35e-21	PLTP	1.63225e-14	-1.54168	0.133	0.233	3.86614e-10	NBPF1	1.34115e-08	0.518759	0.616	0.464	0.000317665
RAB13	1.69168e-33	-0.526304	0.429	0.6	4.00692e-29	ARSJ	1.26472e-21	-0.71595	0.055	0.21	2.99563e-17	ARPC1B	3.515e-39	-2.05971	0.073	0.246	8.32564e-35	SYN3	1.21309e-54	1.30956	0.114	0.026	2.87332e-50	NRP2	5.78e-26	-0.999077	0.086	0.239	1.37e-21	PTPRO	1.6848e-14	0.615675	0.311	0.175	3.99061e-10	MYOCD	1.36453e-08	0.758892	0.281	0.131	0.000323203
ZFAS1	2.19178e-33	-0.640295	0.732	0.839	5.19144e-29	2021-09-09	1.39879e-21	-0.54756	0.69	0.837	3.31318e-17	GABRA3	3.96168e-39	1.90428	0.343	0.142	9.38364e-35	TFPI2	1.71398e-54	-1.34852	0.039	0.155	4.05974e-50	ATF3	6.98e-26	-1.48182	0.064	0.205	1.65e-21	PLS3	1.79276e-14	-1.40015	0.021	0.073	4.24634e-10	CRABP2	1.40388e-08	-0.969647	0.103	0.259	0.000332523
PAK3	2.79289e-33	1.12487	0.269	0.128	6.61523e-29	SLC26A7	1.59422e-21	-1.60289	0.02	0.145	3.77607e-17	CAPN3	4.36236e-39	-3.48618	0.062	0.227	1.03327e-34	NLGN3	1.88222e-54	1.27399	0.206	0.085	4.45822e-50	PHACTR3	7.13e-26	0.553095	0.75	0.555	1.69e-21	ZNF493	2.11968e-14	0.58029	0.782	0.716	5.02068e-10	MACF1	1.407e-08	0.886297	0.822	0.783	0.000333263
LRRTM4	3.3804e-33	1.366	0.199	0.077	8.00682e-29	GAD1	1.6087e-21	0.932629	0.599	0.41	3.81038e-17	GPX4	4.4775e-39	-0.623856	0.799	0.898	1.06054e-34	TMEM178A	3.97375e-54	1.15941	0.332	0.187	9.41222e-50	PMP22	8.45e-26	-1.13275	0.111	0.276	2e-21	CHI3L2	2.57867e-14	-2.03976	0.005	0.036	6.10783e-10	BASP1	1.52522e-08	0.589496	0.575	0.4	0.000361264
NETO1	3.62356e-33	1.34076	0.174	0.06	8.58276e-29	S1PR1	1.86639e-21	-0.951759	0.023	0.152	4.42073e-17	ASCL1	9.10259e-39	0.575747	0.773	0.561	2.15604e-34	PKMYT1	4.09771e-54	-0.861665	0.065	0.194	9.70584e-50	HEY1	1.02e-25	-0.864551	0.658	0.765	2.41e-21	PCDH18	3.14011e-14	-0.631511	0.068	0.152	7.43767e-10	PKD1	1.53655e-08	0.717752	0.762	0.698	0.000363947
MT1X	4.15541e-33	-1.98431	0.361	0.505	9.8425e-29	PTPRO	1.90146e-21	0.838118	0.466	0.262	4.50379e-17	HEPACAM	1.06677e-38	0.789605	0.389	0.166	2.52675e-34	EYA1	6.56343e-54	1.43633	0.184	0.069	1.55461e-49	CACNA2D1	1.07e-25	0.62078	0.29	0.097	2.54e-21	RGMA	4.22473e-14	-0.686923	0.364	0.494	1.00067e-09	KIFC1	1.62448e-08	-0.847771	0.112	0.278	0.000384775
SGIP1	4.57491e-33	0.657574	0.286	0.142	1.08361e-28	PKM	2.05532e-21	-0.577799	0.893	0.972	4.86822e-17	ENPP2	1.56328e-38	-2.37849	0.043	0.198	3.70278e-34	TPX2	6.6173e-54	-0.850012	0.102	0.247	1.56737e-49	SNX1	1.63e-25	0.526468	0.872	0.796	3.86e-21	CIB1	4.38808e-14	-0.54019	0.239	0.371	1.03936e-09	SBSPON	1.6417e-08	0.929332	0.575	0.445	0.000388852
SLC26A10	5.14304e-33	0.765371	0.401	0.247	1.21818e-28	FLRT2	2.19257e-21	-0.864957	0.043	0.185	5.19332e-17	OPHN1	2.52613e-38	0.53883	0.994	0.991	5.9834e-34	TUBA1B	1.27296e-53	-0.727898	0.962	0.978	3.01514e-49	TAGLN3	1.88e-25	0.582711	0.588	0.361	4.46e-21	PIP4K2A	4.89578e-14	-0.588626	0.265	0.394	1.15961e-09	PIRT	1.69268e-08	1.90274	0.103	0.019	0.000400927
PLA2G16	5.41457e-33	-0.524786	0.246	0.409	1.2825e-28	ELK3	2.47396e-21	-0.981398	0.164	0.349	5.85982e-17	DDR1	3.33062e-38	0.659663	0.824	0.682	7.88891e-34	LURAP1L	1.5477e-53	1.5712	0.156	0.051	3.66587e-49	ETNK1	2.42e-25	0.521175	0.743	0.557	5.73e-21	FAM49A	5.49018e-14	0.821846	0.226	0.108	1.3004e-09	KLHDC8A	1.76235e-08	0.652773	0.675	0.517	0.00041743
SYTL2	1.03781e-32	-0.805155	0.151	0.29	2.45816e-28	ETNK1	2.84104e-21	0.835318	0.925	0.899	6.72929e-17	CCDC88A	3.96025e-38	0.718997	0.906	0.848	9.38026e-34	GNAO1	1.75973e-53	0.986664	0.5	0.361	4.16811e-49	MAPK10	2.96e-25	0.702184	0.582	0.364	7.01e-21	RARRES3	6.52543e-14	-1.62359	0.012	0.054	1.54561e-09	AP4S1	1.83448e-08	0.647059	0.819	0.74	0.000434514
CMTM5	1.09804e-32	0.932916	0.199	0.078	2.60081e-28	HSD17B14	2.95874e-21	-0.908494	0.054	0.205	7.00808e-17	MYO7B	4.94164e-38	0.798374	0.413	0.19	1.17048e-33	PCNT	2.62341e-53	1.51194	0.514	0.408	6.2138e-49	BMP2	3.18e-25	0.781809	0.729	0.594	7.52e-21	SPARCL1	6.52715e-14	-1.6137	0.463	0.55	1.54602e-09	UBE2C	1.84074e-08	-0.870295	0.209	0.381	0.000435998
CELSR3	1.32838e-32	0.650747	0.503	0.352	3.14641e-28	S100A13	3.4605e-21	-0.844345	0.071	0.235	8.19655e-17	FAT1	6.04596e-38	-0.998711	0.458	0.675	1.43205e-33	NACAD	3.18252e-53	0.779079	0.288	0.149	7.53812e-49	CCSER2	3.43e-25	0.59719	0.86	0.799	8.13e-21	NFASC	6.5939e-14	0.516209	0.692	0.587	1.56183e-09	TEAD4	1.85926e-08	-1.02823	0.056	0.193	0.000440385
KLRC3	1.33309e-32	1.01425	0.276	0.136	3.15756e-28	ARHGEF7	3.54866e-21	0.86472	0.819	0.758	8.40537e-17	GRIK2	7.10238e-38	0.934207	0.694	0.492	1.68227e-33	SPAG5	1.18275e-52	-0.82673	0.101	0.243	2.80145e-48	PHPT1	3.47e-25	-0.810232	0.632	0.751	8.22e-21	BTBD17	1.08436e-13	0.604693	0.387	0.243	2.56841e-09	QSOX1	2.09937e-08	0.853555	0.544	0.384	0.000497258
DHRS3	1.35047e-32	-1.30976	0.087	0.203	3.19871e-28	SFRP5	3.74971e-21	-1.59024	0.012	0.126	8.88155e-17	LPAL2	7.5167e-38	0.55114	0.903	0.875	1.78041e-33	APCDD1L	1.35624e-52	-0.996322	0.024	0.127	3.21238e-48	SLIT1	3.66e-25	0.68158	0.756	0.594	8.66e-21	HOPX	1.18865e-13	-1.47532	0.02	0.07	2.81544e-09	SNAP91	2.12367e-08	0.526234	0.362	0.197	0.000503014
WDR34	1.76233e-32	-0.735559	0.36	0.517	4.17424e-28	C2	4.53215e-21	-1.68034	0.024	0.15	1.07349e-16	PIK3R1	7.90978e-38	0.957814	0.663	0.47	1.87351e-33	SRGAP1	1.67192e-52	1.17049	0.438	0.304	3.96011e-48	LRRTM4	3.76e-25	0.601523	0.542	0.317	8.91e-21	NLGN4Y	1.22589e-13	0.582688	0.398	0.261	2.90364e-09	NHLH1	2.13507e-08	1.66349	0.297	0.159	0.000505714
FOXM1	1.89876e-32	-1.29524	0.19	0.332	4.49741e-28	SNX22	5.0477e-21	1.10845	0.786	0.67	1.1956e-16	IL17RB	8.85465e-38	1.48464	0.413	0.206	2.09731e-33	SPHKAP	2.50969e-52	1.38926	0.101	0.02	5.94446e-48	ADCY8	3.97e-25	-1.16902	0.061	0.197	9.4e-21	TUBA1B	1.22811e-13	-0.949809	0.945	0.943	2.9089e-09	DHCR24	2.16966e-08	-0.552387	0.312	0.522	0.000513905
RNASEH2A	2.15006e-32	-0.596538	0.326	0.484	5.09264e-28	ECHDC2	6.91734e-21	-0.684526	0.08	0.243	1.63844e-16	TRIM9	8.86201e-38	1.28811	0.713	0.575	2.09906e-33	ANKRD6	3.05141e-52	1.52933	0.248	0.121	7.22758e-48	GABRB1	4.04e-25	-0.807124	0.117	0.286	9.57e-21	NOL4	1.25221e-13	0.61476	0.641	0.52	2.96598e-09	PPP2R2C	2.18208e-08	0.901144	0.297	0.147	0.000516849
NUSAP1	2.49172e-32	-0.665847	0.16	0.3	5.9019e-28	FKBP9	7.84791e-21	-0.574472	0.777	0.876	1.85886e-16	CXCR4	9.14437e-38	-0.728311	0.106	0.301	2.16593e-33	HIVEP2	4.07915e-52	0.828444	0.314	0.171	9.66187e-48	NXPH1	4.17e-25	0.700873	0.726	0.569	9.87e-21	APLP1	1.25413e-13	0.66469	0.504	0.375	2.97053e-09	BLK	2.20256e-08	0.924545	0.178	0.06	0.000521699
DLGAP1	5.16586e-32	0.868842	0.506	0.357	1.22358e-27	FGFRL1	9.03321e-21	-1.17233	0.063	0.215	2.13961e-16	ID4	9.48832e-38	-0.792021	0.166	0.383	2.2474e-33	PAK3	1.11884e-51	1.62248	0.159	0.055	2.65008e-47	HLA-B	4.21e-25	-0.831287	0.515	0.681	9.98e-21	PAK7	1.38486e-13	0.737348	0.34	0.214	3.28017e-09	RAB11B	2.40725e-08	0.711213	0.653	0.534	0.000570182
CENPF	5.31307e-32	-0.718487	0.179	0.321	1.25845e-27	ANO6	9.29647e-21	-0.634619	0.472	0.638	2.20196e-16	SCG5	1.09493e-37	0.566591	0.646	0.367	2.59344e-33	ANK3	3.37168e-51	1.92591	0.362	0.236	7.98617e-47	OSBPL3	4.34e-25	-1.00091	0.067	0.206	1.03e-20	TPP1	1.4116e-13	-0.971355	0.406	0.535	3.34351e-09	SLC17A9	2.47284e-08	-0.740614	0.041	0.171	0.000585716
CCNB2	5.61071e-32	-1.06307	0.116	0.241	1.32895e-27	KLRK1	9.44853e-21	2.40405	0.314	0.145	2.23798e-16	TOM1L1	1.11216e-37	-0.730363	0.184	0.405	2.63427e-33	GNGT1	4.9661e-51	-2.23055	0.023	0.121	1.17627e-46	LRRC16A	4.35e-25	-0.869587	0.058	0.192	1.03e-20	PDIA2	2.90326e-13	0.832523	0.192	0.085	6.87665e-09	CAMK2N1	2.54132e-08	0.831165	0.312	0.162	0.000601936
SCG5	6.41818e-32	0.691803	0.519	0.377	1.52021e-27	CDC42EP1	1.17996e-20	-1.10211	0.266	0.459	2.79487e-16	IQGAP1	1.181e-37	-0.812793	0.273	0.48	2.79733e-33	HLA-B	7.01592e-51	-0.666121	0.213	0.374	1.66179e-46	PLCD3	4.38e-25	-1.42113	0.113	0.268	1.04e-20	EDIL3	2.97378e-13	0.551564	0.171	0.066	7.04371e-09	STON2	2.55467e-08	0.919737	0.588	0.453	0.000605098
TMOD2	6.53703e-32	0.663161	0.858	0.804	1.54836e-27	FAM50B	1.24886e-20	-0.953747	0.045	0.19	2.95804e-16	TNK2	2.19847e-37	1.1587	0.59	0.414	5.20729e-33	VCAN	7.18723e-51	0.773839	0.321	0.175	1.70237e-46	CASK	4.39e-25	0.695965	0.632	0.431	1.04e-20	GMNN	3.14035e-13	-1.08256	0.179	0.283	7.43823e-09	RBP1	2.56697e-08	1.19508	0.497	0.35	0.000608011
CNTNAP5	1.05164e-31	1.27805	0.261	0.132	2.49092e-27	TRIM22	1.30344e-20	-1.18617	0.044	0.185	3.08734e-16	COL20A1	2.74119e-37	1.10876	0.618	0.41	6.49278e-33	RBFOX2	8.345e-51	0.586798	0.863	0.835	1.9766e-46	CPNE5	4.55e-25	-0.783603	0.117	0.285	1.08e-20	REEP1	3.1682e-13	0.562267	0.44	0.298	7.50419e-09	IRS4	2.57507e-08	-1.03824	0.016	0.124	0.00060993
XKR4	1.07404e-31	0.855265	0.182	0.066	2.54397e-27	DCX	1.39119e-20	0.665037	0.773	0.674	3.29517e-16	EPAS1	4.28145e-37	2.18461	0.255	0.075	1.0141e-32	CNTN2	9.91762e-51	2.09182	0.149	0.05	2.34909e-46	NOG	4.68e-25	-0.708874	0.121	0.289	1.11e-20	RAPGEFL1	3.3296e-13	0.62021	0.425	0.296	7.88649e-09	CD63	2.61609e-08	0.661509	0.806	0.814	0.000619647
ATRX	1.14644e-31	0.548744	0.892	0.834	2.71545e-27	ANXA11	1.42301e-20	-0.609874	0.062	0.217	3.37054e-16	PHLDB1	4.41725e-37	0.871177	0.831	0.713	1.04627e-32	SFRP1	1.72565e-50	0.954251	0.222	0.098	4.08737e-46	TUBA1C	5.23e-25	-0.624105	0.338	0.547	1.24e-20	GPX3	3.33363e-13	-2.16345	0.038	0.099	7.89604e-09	PMEL	2.67788e-08	-2.61985	0.012	0.117	0.000634282
INPP5D	1.23197e-31	-1.4779	0.014	0.084	2.91804e-27	SYT11	1.45595e-20	0.572447	0.974	0.975	3.44857e-16	GLI3	4.509e-37	-0.747067	0.138	0.342	1.068e-32	AGPAT2	1.82935e-50	-0.851535	0.048	0.166	4.333e-46	HIST1H2BD	5.61e-25	-1.67174	0.09	0.239	1.33e-20	PAQR4	3.85873e-13	0.706339	0.445	0.315	9.1398e-09	EGR1	2.70349e-08	1.12444	0.516	0.39	0.000640349
P4HA1	1.24292e-31	-0.853141	0.328	0.482	2.94399e-27	EPHX2	1.46066e-20	-0.857969	0.019	0.139	3.45973e-16	SVIL	4.89031e-37	-0.598921	0.18	0.389	1.15832e-32	FAM131B	3.74011e-50	0.819566	0.133	0.039	8.85881e-46	MMP16	6.23e-25	0.944627	0.52	0.332	1.48e-20	INSM1	3.86445e-13	0.581366	0.213	0.101	9.15334e-09	MND1	2.70555e-08	-1.15348	0.097	0.248	0.000640836
HERC2P2	1.27054e-31	0.513401	0.887	0.84	3.00941e-27	TGFBR2	1.50216e-20	-0.763191	0.024	0.15	3.55803e-16	SEC61G	7.16706e-37	-0.553383	0.591	0.813	1.69759e-32	SLIT1	5.67972e-50	1.56459	0.09	0.016	1.3453e-45	CBS	6.56e-25	-0.772934	0.348	0.552	1.55e-20	NMB	4.25029e-13	-1.86833	0.08	0.161	1.00672e-08	PDE6H	3.0269e-08	-1.66446	0.022	0.134	0.000716951
CA12	2.58822e-31	-1.24162	0.204	0.339	6.13045e-27	LIMS1	1.73654e-20	-0.575589	0.902	0.938	4.11317e-16	FLNA	7.38686e-37	-0.753339	0.58	0.776	1.74965e-32	NPR3	8.27011e-50	-0.781988	0.039	0.149	1.95886e-45	RBPJ	7.08e-25	0.510834	0.816	0.651	1.68e-20	GRIN2B	4.31071e-13	0.60877	0.147	0.052	1.02104e-08	PPAPDC1B	3.13009e-08	1.26337	0.512	0.366	0.000741393
PYGL	2.71169e-31	-0.985435	0.221	0.371	6.42291e-27	DHRS3	2.16089e-20	-1.48177	0.057	0.204	5.11828e-16	XYLT1	7.40093e-37	1.10018	0.611	0.419	1.75298e-32	RNASEH2A	8.7065e-50	-0.605121	0.223	0.391	2.06222e-45	SMARCA5	8.07e-25	0.647195	0.756	0.62	1.91e-20	PTTG1	4.50579e-13	-2.08553	0.038	0.099	1.06724e-08	SYT7	3.29212e-08	0.72493	0.359	0.212	0.000779773
TCEAL2	2.75297e-31	0.790474	0.348	0.203	6.5207e-27	JUN	2.19323e-20	-0.543807	0.716	0.871	5.19488e-16	TAGLN3	8.69851e-37	0.867806	0.64	0.419	2.06033e-32	DPYSL5	9.02106e-50	0.945162	0.692	0.597	2.13673e-45	LRRC8A	1.12e-24	-0.698391	0.452	0.641	2.66e-20	SLC3A2	6.05964e-13	-0.661894	0.727	0.795	1.43529e-08	NDUFAF2	3.34015e-08	-0.50295	0.384	0.584	0.000791147
MAST1	3.50014e-31	0.78521	0.403	0.258	8.29043e-27	THBS1	2.25006e-20	-1.94246	0.048	0.187	5.32949e-16	IGFBP7	1.23974e-36	-2.2798	0.038	0.182	2.93644e-32	SOX11	9.65829e-50	0.55661	0.927	0.914	2.28766e-45	SCN1A	1.29e-24	0.711311	0.43	0.22	3.05e-20	LIX1	6.86626e-13	-1.27663	0.104	0.19	1.62634e-08	TCERG1L	3.41639e-08	0.70236	0.197	0.071	0.000809206
SYNGR2	4.12798e-31	-0.595816	0.128	0.257	9.77755e-27	SRPX	2.28945e-20	-1.91583	0.042	0.179	5.42278e-16	ASTN1	1.33805e-36	0.55031	0.857	0.723	3.16931e-32	TOP2A	1.66335e-49	-0.786782	0.106	0.245	3.93982e-45	TSPAN12	1.4e-24	-0.890965	0.328	0.532	3.31e-20	MT3	6.88572e-13	-0.849269	0.252	0.369	1.63095e-08	C3	3.47585e-08	-0.91504	0.016	0.122	0.00082329
RARRES2	5.00477e-31	-1.02156	0.207	0.346	1.18543e-26	NEFL	2.53934e-20	0.868516	0.466	0.255	6.01468e-16	CHRNA4	1.43268e-36	0.667119	0.291	0.097	3.39345e-32	SMC4	1.88072e-49	-0.525704	0.229	0.397	4.45467e-45	TSPAN7	1.79e-24	-0.561979	0.912	0.945	4.23e-20	MYT1L	7.00682e-13	1.06481	0.17	0.071	1.65964e-08	GTF2I	3.49473e-08	0.805322	0.631	0.521	0.000827762
ZNF395	7.75008e-31	-0.769633	0.267	0.413	1.83568e-26	NFATC4	2.84342e-20	-0.799368	0.037	0.173	6.73493e-16	ATP2B2	1.46843e-36	0.780116	0.465	0.24	3.47811e-32	KIAA1598	2.44244e-49	1.10837	0.417	0.28	5.78517e-45	SCN2A	2.22e-24	0.760944	0.517	0.303	5.27e-20	NDST4	8.73123e-13	1.09545	0.292	0.175	2.06808e-08	STRA6	3.64023e-08	-0.906133	0.028	0.145	0.000862224
RPS6KL1	8.55354e-31	0.624703	0.319	0.184	2.02599e-26	CXADR	3.22662e-20	0.934702	0.904	0.843	7.64258e-16	S100A4	1.79236e-36	-3.02687	0.003	0.108	4.24539e-32	SCN3A	3.58068e-49	0.927054	0.279	0.146	8.48121e-45	ID3	2.91e-24	-1.47875	0.1	0.251	6.89e-20	SLC8A3	8.98952e-13	0.579482	0.249	0.13	2.12926e-08	KIF19	3.73934e-08	-0.936596	0.053	0.184	0.000885699
GBP1	1.32666e-30	-0.801351	0.143	0.278	3.14234e-26	PARP10	3.43538e-20	-0.895143	0.028	0.154	8.13705e-16	CSMD1	3.0128e-36	0.666652	0.538	0.305	7.13612e-32	ANXA2	6.53513e-49	-0.521024	0.211	0.378	1.54791e-44	INA	2.96e-24	0.61257	0.799	0.688	7e-20	SLC1A5	1.0597e-12	-0.747392	0.062	0.136	2.51001e-08	C3orf72	4.00521e-08	1.24454	0.678	0.55	0.000948673
CLK1	1.4255e-30	0.635792	0.838	0.771	3.37645e-26	ASPH	3.60132e-20	-0.50581	0.591	0.774	8.53009e-16	WSCD1	3.21034e-36	1.16296	0.526	0.314	7.604e-32	PTTG1	7.04748e-49	-0.989446	0.104	0.242	1.66927e-44	STC2	3.18e-24	-0.801269	0.052	0.178	7.54e-20	ATF3	1.13001e-12	-1.57816	0.168	0.274	2.67653e-08	RIMKLB	4.01888e-08	0.548126	0.434	0.262	0.000951913
GDAP1	1.44971e-30	0.815167	0.563	0.425	3.43379e-26	LDLRAD3	3.77889e-20	1.10583	0.756	0.624	8.95069e-16	APC2	4.31661e-36	0.64684	0.566	0.376	1.02243e-31	TMEM229B	8.6479e-49	1.12705	0.106	0.024	2.04834e-44	KLRC4	3.33e-24	1.09718	0.246	0.075	7.89e-20	SOX5	1.25556e-12	0.674016	0.437	0.318	2.97391e-08	RAB5B	4.06584e-08	0.681515	0.734	0.636	0.000963034
C3orf70	1.541e-30	0.721216	0.86	0.813	3.65001e-26	SERPING1	3.85612e-20	-1.50471	0.093	0.252	9.13361e-16	GLIPR1L2	5.65981e-36	0.54027	0.936	0.93	1.34058e-31	MLF1IP	1.11305e-48	-0.562098	0.171	0.326	2.63637e-44	DDAH1	3.63e-24	-0.838111	0.214	0.403	8.6e-20	ANLN	1.27336e-12	-0.77735	0.035	0.094	3.01609e-08	ENPP5	4.15264e-08	1.13075	0.209	0.084	0.000983595
DSCAM	2.05586e-30	0.571723	0.659	0.52	4.8695e-26	CNTNAP3B	4.08096e-20	-0.540117	0.212	0.417	9.66617e-16	PMP22	6.49233e-36	-0.66493	0.171	0.393	1.53777e-31	FAM65B	1.72801e-48	0.962443	0.333	0.2	4.09296e-44	SRGAP1	3.87e-24	0.812236	0.641	0.513	9.17e-20	SCN1A	1.50405e-12	0.59101	0.617	0.496	3.56249e-08	MAGEA4	4.45928e-08	-1.84013	0.022	0.133	0.00105623
ELSPBP1	2.08925e-30	-0.899812	0.012	0.076	4.94859e-26	NEU4	4.28973e-20	0.895001	0.28	0.114	1.01606e-15	DCX	1.1739e-35	0.665083	0.84	0.689	2.7805e-31	NHLH1	2.4683e-48	1.664	0.285	0.156	5.84642e-44	PHKG1	3.88e-24	-1.42567	0.085	0.226	9.19e-20	CNTFR	1.50605e-12	0.677403	0.347	0.224	3.56723e-08	FNBP1L	4.54544e-08	0.756476	0.675	0.553	0.00107663
LDHA	2.15408e-30	-0.526817	0.818	0.888	5.10216e-26	STAT6	4.45289e-20	-0.719185	0.143	0.324	1.05471e-15	AMZ1	1.87367e-35	1.41666	0.253	0.075	4.43799e-31	EPB41L4B	2.99938e-48	1.07047	0.224	0.102	7.10434e-44	DLGAP1	4.17e-24	0.574841	0.775	0.608	9.88e-20	OIP5	1.75138e-12	-1.19654	0.039	0.099	4.14832e-08	KCNJ2	4.67934e-08	-0.659774	0.231	0.431	0.00110835
AMOTL2	2.33115e-30	0.852352	0.451	0.311	5.52156e-26	SOCS2	5.07954e-20	-1.03532	0.065	0.216	1.20314e-15	ANXA11	2.3441e-35	-0.576638	0.109	0.305	5.55222e-31	SORBS1	4.53559e-48	1.03982	0.291	0.162	1.0743e-43	ARL4A	4.7e-24	0.808662	0.546	0.338	1.11e-19	AURKB	1.83386e-12	-1.61322	0.01	0.047	4.34367e-08	MAGEA1	4.71813e-08	-1.79509	0.016	0.121	0.00111754
NMNAT2	2.6071e-30	0.56089	0.227	0.103	6.17517e-26	AHNAK2	5.57412e-20	-0.596727	0.02	0.137	1.32029e-15	SLITRK1	2.93017e-35	1.25645	0.389	0.184	6.9404e-31	DUSP26	1.27358e-47	1.30158	0.338	0.207	3.01661e-43	LITAF	5.83e-24	-1.42224	0.13	0.288	1.38e-19	ABI3BP	1.98065e-12	-0.905791	0.031	0.087	4.69136e-08	GAD2	4.94252e-08	0.857274	0.269	0.126	0.00117069
SLITRK1	2.67222e-30	0.885112	0.256	0.126	6.32943e-26	GBP2	5.83974e-20	-1.59237	0.01	0.117	1.3832e-15	ANP32E	3.20448e-35	-0.851745	0.596	0.776	7.59013e-31	NUSAP1	1.3731e-47	-0.67357	0.138	0.282	3.25234e-43	RASSF4	6.68e-24	-0.742378	0.646	0.777	1.58e-19	TMEM47	2.08432e-12	-1.95601	0.018	0.062	4.93692e-08	CENPE	5.02684e-08	-0.650629	0.094	0.24	0.00119066
C8orf46	2.78518e-30	0.712292	0.609	0.466	6.59697e-26	AQP4	7.92463e-20	-1.29107	0.059	0.205	1.87703e-15	C1QL2	3.54849e-35	1.38015	0.19	0.034	8.40496e-31	B2M	1.64072e-47	-0.526624	0.502	0.671	3.88621e-43	PTBP2	6.79e-24	0.673461	0.57	0.37	1.61e-19	GABRG2	2.11385e-12	1.21706	0.143	0.052	5.00686e-08	TNNT1	5.04154e-08	-1.22694	0.025	0.138	0.00119414
E2F7	3.1589e-30	-0.752665	0.088	0.199	7.48218e-26	NFASC	8.06127e-20	0.881768	0.557	0.37	1.90939e-15	NCAM2	3.7567e-35	1.03048	0.605	0.396	8.89812e-31	TOP1MT	4.14735e-47	-0.555813	0.099	0.234	9.82342e-43	CCNI	7.18e-24	0.515428	0.832	0.692	1.7e-19	HCN3	2.13785e-12	0.649714	0.329	0.208	5.06371e-08	ADAMTS5	5.05444e-08	0.825124	0.2	0.079	0.0011972
OLIG2	3.61215e-30	0.732299	0.558	0.419	8.55573e-26	CELSR3	9.20169e-20	0.899902	0.521	0.353	2.17951e-15	KLRC4	5.43336e-35	2.04145	0.321	0.128	1.28695e-30	HDAC1	5.82356e-47	-0.509347	0.183	0.334	1.37937e-42	SLC4A11	7.52e-24	-1.24351	0.024	0.123	1.78e-19	GBP2	2.16514e-12	-1.34848	0.017	0.06	5.12836e-08	MMP16	5.0961e-08	0.729065	0.256	0.121	0.00120706
ABHD3	4.09707e-30	-0.512507	0.216	0.364	9.70431e-26	ADM	9.35444e-20	-2.03763	0.033	0.161	2.21569e-15	ADORA1	7.64132e-35	0.992961	0.319	0.123	1.80992e-30	SDC3	6.06938e-47	1.09867	0.22	0.102	1.43759e-42	PID1	8.72e-24	0.515416	0.836	0.683	2.07e-19	ATP1A1	2.31333e-12	0.504832	0.791	0.694	5.47936e-08	AGAP2	5.18962e-08	1.48761	0.35	0.214	0.00122921
SENP7	4.14539e-30	0.73376	0.637	0.501	9.81876e-26	MTMR11	9.52312e-20	-0.732929	0.103	0.27	2.25565e-15	LNX1	9.47711e-35	1.41002	0.47	0.267	2.24475e-30	HMGB2	6.08336e-47	-0.820414	0.477	0.651	1.44091e-42	KIAA1683	8.81e-24	-1.6363	0.157	0.321	2.09e-19	TMEM63A	2.31761e-12	-0.673538	0.063	0.138	5.48948e-08	MATK	5.33031e-08	-0.675755	0.053	0.184	0.00126254
KCNH8	4.71916e-30	0.831312	0.183	0.07	1.11778e-25	SYTL2	9.69118e-20	-1.33084	0.063	0.212	2.29545e-15	SERPINE2	1.03184e-34	0.863629	0.909	0.875	2.44402e-30	SPAG9	8.14192e-47	0.514797	0.955	0.944	1.9285e-42	GALNT18	9.73e-24	-1.28025	0.047	0.167	2.3e-19	ZFP36	2.39433e-12	-0.73711	0.124	0.218	5.67121e-08	PDC	5.33191e-08	-3.30834	0.016	0.119	0.00126292
BCHE	5.0113e-30	0.666659	0.647	0.525	1.18698e-25	SKIL	1.161e-19	1.08136	0.819	0.765	2.74995e-15	SCAMP5	1.05969e-34	1.06964	0.528	0.339	2.50998e-30	ASIC1	9.05576e-47	1.23219	0.343	0.211	2.14495e-42	PGRMC1	9.87e-24	0.547294	0.756	0.593	2.34e-19	FTH1	2.55876e-12	-0.766756	0.996	0.997	6.06067e-08	RELL1	5.55049e-08	0.58772	0.712	0.576	0.00131469
CSPG5	5.57948e-30	0.882487	0.492	0.356	1.32156e-25	GATAD2B	1.21321e-19	0.809338	0.828	0.799	2.87362e-15	PSAP	2.27264e-34	-0.5433	0.973	0.99	5.38299e-30	DTL	9.21176e-47	-0.618207	0.104	0.236	2.1819e-42	GNG2	9.96e-24	0.582024	0.638	0.438	2.36e-19	CBWD3	2.67043e-12	0.594809	0.704	0.627	6.32518e-08	NDST4	5.62553e-08	0.785367	0.253	0.116	0.00133246
SNTG1	8.71392e-30	0.931731	0.43	0.29	2.06398e-25	KLRC4-KLRK1	1.23286e-19	2.12922	0.188	0.054	2.92016e-15	BEX2	2.80017e-34	0.752898	0.668	0.501	6.63248e-30	CDC45	9.21879e-47	-0.974842	0.056	0.169	2.18356e-42	HIP1	1.02e-23	0.767108	0.897	0.878	2.41e-19	LDHA	3.30452e-12	-0.697586	0.656	0.724	7.8271e-08	PTTG1IP	5.72605e-08	0.800214	0.666	0.595	0.00135627
KIF5C	8.8981e-30	0.830649	0.606	0.483	2.1076e-25	CLASP2	1.27201e-19	0.69918	0.861	0.832	3.01288e-15	TMEM173	2.82885e-34	-1.54974	0.01	0.121	6.70041e-30	PBK	1.19453e-46	-0.972029	0.052	0.164	2.82935e-42	NAP1L5	1.36e-23	0.987113	0.32	0.135	3.23e-19	PREX1	3.40882e-12	-1.721	0.035	0.093	8.07413e-08	DMRTA1	5.83702e-08	1.30597	0.2	0.079	0.00138256
HMGB2	1.27429e-29	-0.540557	0.399	0.549	3.01829e-25	RCAN1	1.28321e-19	-0.684362	0.186	0.382	3.0394e-15	MYLK	2.94548e-34	-2.86076	0.095	0.266	6.97667e-30	KIF2C	1.26148e-46	-0.81144	0.074	0.194	2.98794e-42	SMOC1	1.42e-23	0.590116	0.956	0.907	3.37e-19	SLFN11	3.49998e-12	0.592419	0.089	0.017	8.29004e-08	AGT	5.87643e-08	1.55966	0.075	0.009	0.00139189
CHI3L2	1.75227e-29	-3.65803	0.028	0.105	4.15042e-25	B4GALT1	1.36964e-19	-0.68147	0.127	0.301	3.24413e-15	SGIP1	3.05305e-34	1.25182	0.385	0.185	7.23145e-30	BCMO1	1.5893e-46	-1.19112	0.028	0.124	3.76441e-42	PCDHGC4	1.73e-23	0.870196	0.564	0.378	4.1e-19	PMAIP1	3.66696e-12	-0.933262	0.01	0.045	8.68556e-08	HIST2H2BE	6.24505e-08	1.23583	0.422	0.276	0.0014792
TROAP	1.85601e-29	-0.71099	0.081	0.189	4.39614e-25	CAPG	1.49096e-19	-1.18701	0.033	0.161	3.5315e-15	GSX1	3.05905e-34	0.78165	0.197	0.038	7.24567e-30	UHRF1	2.14818e-46	-0.584801	0.151	0.296	5.08818e-42	NID1	2.35e-23	-0.993379	0.031	0.135	5.57e-19	FAM46A	4.29909e-12	-0.684578	0.034	0.09	1.01828e-07	CALCB	6.45131e-08	1.14538	0.25	0.116	0.00152806
TRO	1.86615e-29	0.625459	0.59	0.445	4.42017e-25	RTN1	1.6152e-19	1.19842	0.476	0.308	3.82576e-15	DLGAP1	3.34803e-34	0.792951	0.683	0.487	7.93014e-30	MYO16	3.30299e-46	0.67038	0.368	0.221	7.82347e-42	VEZT	2.54e-23	0.75742	0.467	0.254	6.01e-19	NXPH1	7.57721e-12	0.549593	0.596	0.479	1.79474e-07	PPAP2C	6.53663e-08	-1.15461	0.062	0.195	0.00154827
NLGN4Y	1.98173e-29	0.809442	0.383	0.238	4.69392e-25	NNAT	1.87544e-19	1.633	0.565	0.417	4.44217e-15	ST6GAL1	4.20145e-34	1.43634	0.466	0.263	9.95157e-30	FSTL4	3.98877e-46	1.37412	0.391	0.262	9.4478e-42	DOCK9	2.7e-23	-0.744896	0.1	0.254	6.41e-19	CKMT1B	7.97831e-12	0.521205	0.301	0.178	1.88974e-07	FAM210B	7.63501e-08	0.864263	0.684	0.598	0.00180843
CA9	2.03287e-29	-1.45032	0.029	0.108	4.81507e-25	FAM5B	2.12965e-19	1.22951	0.317	0.147	5.04428e-15	TSPAN7	5.50082e-34	1.16701	0.788	0.704	1.30293e-29	GABBR2	4.14901e-46	1.16441	0.231	0.113	9.82734e-42	MARCKSL1	2.76e-23	0.531281	0.799	0.667	6.53e-19	NR1H4	8.43769e-12	0.786256	0.116	0.034	1.99855e-07	GRIA4	7.65364e-08	1.19766	0.378	0.243	0.00181284
SOD2	2.195e-29	-1.67107	0.376	0.522	5.19909e-25	CCND2	2.41821e-19	0.534005	0.924	0.792	5.72778e-15	BDH2	6.82722e-34	-0.606565	0.138	0.336	1.61709e-29	BOC	5.0887e-46	0.984228	0.433	0.302	1.20531e-41	DAPK1	2.84e-23	-0.687554	0.103	0.254	6.73e-19	TROAP	9.06229e-12	-1.47702	0.019	0.062	2.14649e-07	CCNB2	7.79279e-08	-0.683155	0.284	0.466	0.0018458
EYA1	2.50484e-29	1.88047	0.213	0.097	5.93296e-25	C16orf11	2.78179e-19	-0.899069	0.009	0.113	6.58894e-15	MAGI2	7.38629e-34	0.803412	0.653	0.466	1.74952e-29	SHANK2	5.50139e-46	0.596658	0.195	0.084	1.30306e-41	NDUFA5	3.04e-23	-0.578422	0.744	0.852	7.2e-19	MTHFD2	9.46099e-12	-1.00009	0.571	0.645	2.24093e-07	CITED2	9.11144e-08	0.785187	0.275	0.14	0.00215814
SRGAP3	2.79952e-29	0.767879	0.542	0.404	6.63094e-25	RIT2	2.9338e-19	1.4161	0.321	0.154	6.949e-15	APOBEC3C	8.26613e-34	-1.57463	0.044	0.188	1.95792e-29	CDC20	1.24044e-45	-1.15438	0.069	0.188	2.93811e-41	TMEFF2	3.33e-23	0.560419	0.593	0.38	7.88e-19	HMGA1P7	9.50658e-12	0.996669	0.128	0.043	2.25173e-07	GLB1L2	9.28253e-08	-0.641809	0.147	0.319	0.00219866
SLC1A5	3.0239e-29	-1.00106	0.084	0.193	7.1624e-25	KLRC2	3.15438e-19	1.35918	0.399	0.218	7.47146e-15	DLL3	8.63181e-34	1.20421	0.538	0.335	2.04453e-29	CKS1B	2.41288e-45	-0.51892	0.284	0.456	5.71516e-41	PDE4B	3.69e-23	0.72825	0.773	0.632	8.74e-19	NTRK2	9.77024e-12	-1.29766	0.63	0.696	2.31418e-07	UGT3A1	9.39232e-08	-1.17621	0.031	0.143	0.00222466
CDKN1A	3.3851e-29	-0.501215	0.297	0.448	8.01796e-25	HNRNPH1	3.73954e-19	0.794891	1	0.999	8.85746e-15	PTCH1	8.68964e-34	1.01108	0.694	0.563	2.05823e-29	MDGA1	3.85245e-45	0.964526	0.278	0.152	9.12492e-41	DOCK10	4.55e-23	0.763297	0.632	0.452	1.08e-18	CNN3	1.05731e-11	-0.527133	0.964	0.969	2.50434e-07	LPPR1	9.41036e-08	-0.817335	0.147	0.305	0.00222894
DSEL	3.58774e-29	0.6708	0.935	0.918	8.49791e-25	NEIL1	4.09261e-19	-0.717141	0.097	0.254	9.69375e-15	KCNIP1	1.24727e-33	1.7508	0.225	0.06	2.95429e-29	NSG1	4.28475e-45	1.15171	0.221	0.104	1.01489e-40	C1orf198	4.63e-23	-0.674106	0.452	0.645	1.1e-18	PTGDS	1.08243e-11	0.600337	0.392	0.274	2.56385e-07	THSD7A	9.56341e-08	0.742382	0.234	0.103	0.00226519
PTTG1	4.68504e-29	-1.05115	0.182	0.311	1.1097e-24	NYNRIN	4.50804e-19	-1.54233	0.154	0.329	1.06777e-14	LINGO1	1.32312e-33	0.954344	0.391	0.191	3.13394e-29	FUT9	4.5729e-45	0.809705	0.372	0.244	1.08314e-40	ID2	4.98e-23	-0.690837	0.721	0.83	1.18e-18	MERTK	1.2082e-11	-1.02793	0.08	0.155	2.86175e-07	LRRC55	9.97688e-08	0.678694	0.222	0.095	0.00236312
OMG	5.69698e-29	1.26206	0.301	0.173	1.34939e-24	SDC4	4.56801e-19	-0.981791	0.073	0.223	1.08198e-14	LRRN1	1.33516e-33	0.653872	0.799	0.652	3.16246e-29	GREB1	8.14478e-45	0.610839	0.914	0.896	1.92917e-40	TMEM107	6.78e-23	-0.955119	0.168	0.335	1.61e-18	DNER	1.26019e-11	0.577381	0.833	0.769	2.98489e-07	TTC3	1.00071e-07	0.660011	0.95	0.979	0.00237028
HES1	5.8281e-29	-0.596482	0.177	0.319	1.38044e-24	NRN1	4.57256e-19	-0.984792	0.275	0.501	1.08306e-14	ANXA2	1.83311e-33	-2.5643	0.125	0.295	4.34192e-29	TACC3	1.31731e-44	-0.818873	0.064	0.178	3.12017e-40	GALNT15	7.04e-23	-0.844907	0.497	0.656	1.67e-18	ST6GAL1	1.30541e-11	0.648858	0.329	0.208	3.092e-07	CELF5	1.02355e-07	0.621594	0.222	0.097	0.00242439
NREP	7.03161e-29	0.716844	0.807	0.75	1.66551e-24	SCARA3	4.65815e-19	-0.917765	0.221	0.408	1.10333e-14	TMEM106C	2.13102e-33	-0.626765	0.337	0.565	5.04753e-29	CENPF	2.04976e-44	-0.672073	0.166	0.31	4.85505e-40	HEY2	8.18e-23	-1.08611	0.048	0.165	1.94e-18	LYPD1	1.66063e-11	-0.821867	0.086	0.163	3.93337e-07	FAM86C1	1.08017e-07	-0.755802	0.066	0.198	0.0025585
SIVA1	7.34379e-29	-0.538802	0.415	0.569	1.73945e-24	KIF21B	4.72925e-19	0.988474	0.488	0.324	1.12017e-14	NMNAT2	2.33122e-33	0.775981	0.553	0.346	5.52173e-29	BUB1B	3.2264e-44	-0.573702	0.068	0.184	7.64205e-40	ARHGEF26	8.26e-23	-0.539173	0.502	0.687	1.96e-18	KIAA0408	1.92292e-11	0.548476	0.652	0.591	4.55462e-07	HMGA2	1.13479e-07	-0.936115	0.016	0.114	0.00268785
PCDH7	8.18592e-29	0.568	0.206	0.089	1.93892e-24	KLRC3	5.44208e-19	1.10379	0.379	0.192	1.28901e-14	SQSTM1	2.34904e-33	-1.06788	0.476	0.658	5.56393e-29	PIRT	5.60043e-44	1.73027	0.084	0.016	1.32652e-39	TMIE	8.36e-23	-1.46672	0.04	0.15	1.98e-18	PHF19	1.92415e-11	-0.512507	0.174	0.276	4.55755e-07	CENPF	1.21453e-07	-0.632315	0.331	0.507	0.00287673
NEU4	8.20668e-29	1.09309	0.359	0.229	1.94383e-24	TUBB6	6.65774e-19	-0.633532	0.228	0.424	1.57695e-14	ITM2A	2.65293e-33	-1.16232	0.312	0.523	6.28372e-29	MAP1LC3A	6.08997e-44	0.754711	0.581	0.478	1.44247e-39	DGCR2	1.05e-22	0.573672	0.802	0.71	2.49e-18	PCDHB2	2.03142e-11	0.569974	0.498	0.381	4.81162e-07	CKS2	1.23044e-07	-0.567825	0.419	0.626	0.00291442
PDGFRA	8.81775e-29	1.34743	0.552	0.447	2.08857e-24	RARA	6.81213e-19	-0.785164	0.332	0.526	1.61352e-14	USP11	2.83113e-33	0.582685	0.888	0.798	6.70582e-29	GSE1	7.48481e-44	0.778685	0.85	0.825	1.77285e-39	PSPH	1.32e-22	-1.1133	0.756	0.85	3.12e-18	XBP1	2.09098e-11	-0.60865	0.195	0.301	4.9527e-07	MLL5	1.27541e-07	0.664498	0.891	0.878	0.00302093
EGLN3	1.0151e-28	-1.3719	0.127	0.246	2.40436e-24	IGFBPL1	9.007e-19	0.894755	0.598	0.463	2.1334e-14	BHLHE40	3.13942e-33	-0.781226	0.084	0.252	7.43603e-29	HCAR2	8.15235e-44	1.19804	0.078	0.013	1.93096e-39	DOK5	1.39e-22	-0.705884	0.19	0.37	3.28e-18	NPC2	2.12783e-11	-0.505859	0.279	0.399	5.03997e-07	ITM2B	1.31007e-07	0.911004	0.781	0.778	0.00310304
BAG3	1.02251e-28	-0.54752	0.102	0.217	2.42191e-24	SERINC5	9.82981e-19	1.0145	0.819	0.754	2.32829e-14	SNAPIN	3.54355e-33	-0.511998	0.676	0.843	8.39325e-29	APBB1	9.95763e-44	0.885666	0.591	0.498	2.35856e-39	LYPD1	1.4e-22	-0.503271	0.262	0.458	3.32e-18	PCBP3	2.26821e-11	0.581832	0.315	0.195	5.37249e-07	R3HDM2	1.37071e-07	0.729873	0.825	0.76	0.00324666
UNC80	1.03757e-28	0.535186	0.563	0.423	2.45759e-24	ECM2	9.94965e-19	-0.799867	0.094	0.249	2.35667e-14	MATR3	3.84689e-33	0.512395	0.975	0.967	9.11174e-29	ASF1B	1.1443e-43	-0.822767	0.055	0.163	2.71039e-39	SLC25A48	1.51e-22	-2.17602	0.009	0.084	3.57e-18	KIF2C	2.29092e-11	-1.5982	0.037	0.093	5.42627e-07	ELK2AP	1.43391e-07	0.809679	0.291	0.145	0.00339635
CALCRL	1.071e-28	0.974594	0.342	0.208	2.53676e-24	MAP1B	1.25975e-18	0.61968	0.974	0.94	2.98385e-14	SNX22	3.91794e-33	1.13184	0.736	0.618	9.28004e-29	XPR1	1.19625e-43	0.760577	0.843	0.812	2.83344e-39	CD82	1.67e-22	0.672623	0.888	0.846	3.96e-18	PRSS35	2.36042e-11	-0.885961	0.005	0.031	5.59088e-07	PSIP1	1.4524e-07	0.76297	0.759	0.684	0.00344016
MAP1B	1.08551e-28	0.516909	0.951	0.921	2.57114e-24	ARHGAP24	1.36829e-18	-0.73757	0.049	0.179	3.24092e-14	NXPH1	4.09961e-33	0.957122	0.52	0.303	9.71033e-29	LOC441081	1.35704e-43	0.648244	0.868	0.856	3.21429e-39	ZFYVE21	2.01e-22	-0.844186	0.286	0.476	4.77e-18	GADD45A	2.49552e-11	-0.783164	0.26	0.372	5.9109e-07	CDKN2C	1.54236e-07	0.765994	0.431	0.288	0.00365323
DLX5	1.10923e-28	1.27923	0.162	0.058	2.62732e-24	TPI1	1.51314e-18	-0.537679	0.922	0.977	3.58403e-14	GRM5	4.57499e-33	1.00619	0.216	0.056	1.08363e-28	NUF2	1.84051e-43	-0.796808	0.065	0.179	4.35944e-39	KIAA1644	2.03e-22	0.718736	0.308	0.128	4.8e-18	PCDHB12	2.75974e-11	0.521019	0.332	0.214	6.53671e-07	PDPN	1.5942e-07	1.20483	0.369	0.222	0.00377603
RNF144A	1.2546e-28	0.75184	0.485	0.363	2.97165e-24	LCTL	1.53017e-18	-1.67952	0.027	0.142	3.62437e-14	JUND	5.76209e-33	0.769367	0.506	0.32	1.36481e-28	ID3	2.00136e-43	-1.29577	0.067	0.18	4.74042e-39	FOXG1	2.75e-22	0.57156	0.433	0.223	6.51e-18	SDC2	2.77996e-11	-0.913593	0.014	0.052	6.5846e-07	FOXM1	1.66444e-07	-0.504569	0.209	0.374	0.00394239
NAMPT	1.5972e-28	-1.47924	0.526	0.638	3.78312e-24	TOM1L1	1.80526e-18	-0.64626	0.09	0.244	4.27594e-14	MGST3	6.72133e-33	-0.688772	0.762	0.855	1.59201e-28	ESCO2	2.14814e-43	-0.751757	0.045	0.146	5.08809e-39	RASAL2	2.98e-22	0.758148	0.39	0.205	7.07e-18	TLR4	2.81001e-11	-1.07979	0.021	0.065	6.65579e-07	CHAC2	1.67831e-07	-1.14541	0.103	0.245	0.00397525
ATAT1	1.67803e-28	0.733318	0.691	0.613	3.97459e-24	SAMD9L	1.97835e-18	-0.742584	0.03	0.15	4.68591e-14	DUSP23	7.34577e-33	-0.674392	0.249	0.477	1.73992e-28	GABARAP	2.61697e-43	0.509071	0.86	0.87	6.19855e-39	ATF7IP	3.26e-22	0.540386	0.78	0.622	7.72e-18	TTC9B	2.91044e-11	0.543113	0.272	0.163	6.89367e-07	CHMP1B	1.72736e-07	0.627757	0.866	0.764	0.00409141
MKI67	1.82925e-28	-0.502735	0.132	0.256	4.33275e-24	MLL5	2.11529e-18	0.59424	0.949	0.948	5.01029e-14	CLIP2	9.22026e-33	0.875694	0.607	0.434	2.18391e-28	SAPCD2	4.2766e-43	-0.65679	0.063	0.174	1.01296e-38	SULF1	3.91e-22	-0.806102	0.032	0.134	9.27e-18	WDR86	3.17236e-11	0.556659	0.142	0.056	7.51406e-07	C12orf56	1.73662e-07	0.974603	0.181	0.069	0.00411335
ADAM12	2.36582e-28	-0.510137	0.119	0.24	5.60368e-24	BACE2	2.27103e-18	-0.717938	0.055	0.193	5.37916e-14	CELF3	1.19143e-32	0.720001	0.394	0.198	2.82203e-28	TRO	5.20699e-43	0.887005	0.544	0.438	1.23333e-38	MMP28	4.07e-22	-2.28001	0.013	0.092	9.63e-18	REM1	3.58128e-11	-0.550575	0.06	0.129	8.48263e-07	DCLK1	1.78906e-07	0.679746	0.294	0.155	0.00423757
PTPRG	3.19754e-28	0.832204	0.539	0.41	7.57369e-24	TC2N	2.31179e-18	-0.580574	0.012	0.113	5.4757e-14	KIF21B	1.55743e-32	0.520856	0.656	0.472	3.68894e-28	LYPD2	9.15745e-43	-1.1396	0.005	0.074	2.16903e-38	SULF2	4.36e-22	0.549643	0.833	0.705	1.03e-17	GALNT10	4.33715e-11	0.580927	0.323	0.208	1.0273e-06	CACNA1E	1.79579e-07	0.583377	0.384	0.245	0.0042535
DLL1	3.29668e-28	1.04578	0.403	0.266	7.80852e-24	CELF3	2.37796e-18	0.65652	0.466	0.302	5.63245e-14	BZRAP1	2.73285e-32	0.9526	0.495	0.294	6.47302e-28	TCEAL5	1.21967e-42	0.959296	0.235	0.116	2.88891e-38	SGCB	4.37e-22	0.523025	0.952	0.936	1.04e-17	TUBB6	4.53511e-11	-1.0106	0.046	0.107	1.07419e-06	GALNT18	1.80019e-07	-0.700134	0.078	0.212	0.00426393
ZNF711	3.32378e-28	0.763534	0.516	0.371	7.87271e-24	NR4A1	2.55459e-18	-1.20444	0.256	0.444	6.0508e-14	SOX13	2.90886e-32	1.00021	0.498	0.308	6.88993e-28	REEP2	1.55169e-42	1.18896	0.238	0.123	3.67534e-38	LRRTM2	4.55e-22	0.536927	0.643	0.472	1.08e-17	STOX1	4.60801e-11	-1.3146	0.05	0.111	1.09145e-06	SRL	1.84799e-07	0.990846	0.569	0.436	0.00437714
ASF1B	3.76104e-28	-0.858761	0.101	0.213	8.90839e-24	GRIA1	3.21396e-18	0.903196	0.344	0.176	7.61259e-14	ELFN2	2.92833e-32	0.571741	0.402	0.206	6.93604e-28	SLC12A2	1.69038e-42	-0.63662	0.371	0.531	4.00383e-38	SETD5	5.3e-22	0.616278	0.825	0.71	1.26e-17	CDCA2	4.71277e-11	-0.643983	0.01	0.042	1.11627e-06	HIVEP2	1.98562e-07	0.565657	0.225	0.1	0.00470314
LIMA1	4.62411e-28	0.620251	0.794	0.736	1.09527e-23	BDH2	3.32517e-18	-0.59991	0.239	0.437	7.87599e-14	EGR3	3.14158e-32	0.91591	0.339	0.143	7.44115e-28	CDCA5	2.19048e-42	-0.659487	0.074	0.189	5.18837e-38	MPP6	7.12e-22	-0.814957	0.09	0.229	1.69e-17	COL4A3	4.91152e-11	0.501792	0.145	0.06	1.16334e-06	TOX	1.99151e-07	0.822479	0.119	0.031	0.00471709
SCARB2	5.07986e-28	0.571421	0.927	0.895	1.20322e-23	SRPX2	4.10891e-18	-1.40719	0.023	0.136	9.73237e-14	TTC3	3.31094e-32	0.558184	0.977	0.966	7.8423e-28	SERPINH1	2.30923e-42	-0.555975	0.204	0.357	5.46963e-38	HTATIP2	7.92e-22	-1.58871	0.031	0.13	1.88e-17	DLGAP5	5.41038e-11	-1.45395	0.011	0.045	1.2815e-06	HSD17B2	2.00924e-07	-1.66988	0.006	0.095	0.00475908
REEP1	5.59597e-28	1.03383	0.274	0.147	1.32546e-23	PTPN7	4.71701e-18	-3.76795	0.033	0.15	1.11727e-13	VAMP2	4.81493e-32	0.818017	0.779	0.707	1.14046e-27	GLRB	2.77023e-42	1.45177	0.227	0.115	6.56156e-38	FAM159B	8.78e-22	1.28466	0.198	0.048	2.08e-17	IL17D	5.4498e-11	-1.05234	0.076	0.15	1.29084e-06	TCEAL2	2.03578e-07	1.21814	0.238	0.107	0.00482196
PGAP1	6.31034e-28	0.596977	0.848	0.784	1.49467e-23	PAX6	5.62747e-18	-0.857548	0.126	0.28	1.33292e-13	ZDHHC22	5.13456e-32	0.963786	0.503	0.301	1.21617e-27	PCDH11Y	3.70537e-42	0.635191	0.762	0.729	8.77653e-38	NOMO2	9.91e-22	0.72598	0.635	0.45	2.35e-17	CENPF	5.49852e-11	-1.32906	0.053	0.115	1.30238e-06	UNC13C	2.04311e-07	0.541802	0.134	0.041	0.00483932
PLP1	6.31828e-28	1.28216	0.347	0.214	1.49655e-23	LPL	5.71303e-18	-1.10497	0.155	0.324	1.35319e-13	RTN3	5.78571e-32	0.580744	0.963	0.951	1.3704e-27	NEUROD6	8.60723e-42	2.39282	0.061	0.007	2.03871e-37	MMD2	1.07e-21	-0.728341	0.586	0.719	2.53e-17	BICD1	5.8665e-11	0.5507	0.517	0.403	1.38954e-06	ZNF286A	2.14856e-07	0.715502	0.875	0.793	0.00508909
ANTXR1	6.71192e-28	0.623807	0.615	0.483	1.58978e-23	ODC1	6.15212e-18	-0.517709	0.619	0.836	1.45719e-13	IFITM2	1.04256e-31	-2.3993	0.055	0.194	2.46941e-27	TMOD2	1.25659e-41	0.974788	0.661	0.576	2.97636e-37	TBC1D10A	1.24e-21	-0.823139	0.093	0.238	2.94e-17	PDK4	5.99068e-11	-1.93559	0.022	0.066	1.41895e-06	ANKS1B	2.17053e-07	1.23257	0.275	0.147	0.00514112
PLLP	8.8873e-28	1.19477	0.306	0.181	2.10505e-23	MAGI1	6.31537e-18	0.854125	0.718	0.598	1.49586e-13	MAML2	1.14814e-31	0.813926	0.785	0.727	2.71948e-27	MCM4	1.28277e-41	-0.555863	0.361	0.508	3.03837e-37	HPCA	1.48e-21	-0.688419	0.046	0.158	3.51e-17	SPTSSB	6.31895e-11	-1.56664	0.008	0.038	1.49671e-06	CKMT1A	2.2761e-07	-0.781605	0.262	0.429	0.00539118
BBOX1	9.50769e-28	-0.55492	0.158	0.29	2.25199e-23	ALDH1A1	6.55691e-18	-2.40709	0.001	0.086	1.55307e-13	XKR9	1.29238e-31	0.522352	0.916	0.904	3.06112e-27	CYYR1	1.34426e-41	1.31799	0.225	0.112	3.18401e-37	HKDC1	1.51e-21	-0.715282	0.027	0.122	3.59e-17	ERV3-1	8.60433e-11	0.636255	0.511	0.396	2.03802e-06	SHANK2	2.37179e-07	0.540405	0.291	0.157	0.00561782
KAT2B	1.02353e-27	0.639936	0.478	0.331	2.42434e-23	KCNAB2	6.84226e-18	-2.22247	0.14	0.29	1.62066e-13	TTC9B	1.52958e-31	1.63963	0.242	0.077	3.62296e-27	UBE2C	1.37481e-41	-0.869236	0.091	0.209	3.25637e-37	CYP4F24P	1.91e-21	0.674863	0.308	0.123	4.52e-17	RAB3C	9.1062e-11	0.722943	0.182	0.087	2.1569e-06	EPHA3	2.37804e-07	1.54177	0.306	0.172	0.00563264
DPP6	1.16833e-27	0.566311	0.847	0.775	2.7673e-23	INS-IGF2	7.16817e-18	-4.0643	0.027	0.139	1.69785e-13	TRAF3IP2	1.73013e-31	0.739129	0.889	0.864	4.09799e-27	NALCN	1.38441e-41	0.71168	0.14	0.05	3.27912e-37	LGALS1	1.94e-21	-1.84276	0.036	0.137	4.61e-17	KIF20A	9.16108e-11	-1.03968	0.016	0.055	2.16989e-06	MXD3	2.40253e-07	-0.82204	0.103	0.245	0.00569063
EHD2	1.18797e-27	-0.619664	0.476	0.589	2.81383e-23	IGSF9B	7.47603e-18	0.821608	0.526	0.358	1.77077e-13	CFI	1.89483e-31	-1.92784	0.008	0.107	4.4881e-27	CSMD1	1.99299e-41	0.530789	0.144	0.055	4.72059e-37	OSBPL8	2.02e-21	0.522784	0.625	0.435	4.79e-17	GATSL3	1.02364e-10	-0.831869	0.04	0.097	2.42459e-06	KIAA1324	2.40601e-07	0.821637	0.778	0.702	0.00569888
FZD7	1.48462e-27	-0.576753	0.102	0.214	3.51646e-23	HSPA1A	7.62041e-18	-0.634232	0.486	0.661	1.80497e-13	ADIPOR1	1.90175e-31	-0.51197	0.659	0.814	4.50448e-27	STRA6	2.58596e-41	-0.980181	0.035	0.127	6.12511e-37	OLFM4	2.52e-21	-1.18844	0.016	0.097	5.98e-17	LBH	1.08825e-10	0.554996	0.386	0.265	2.57763e-06	SPAG5	2.43176e-07	-0.643534	0.197	0.366	0.00575985
GRID2	1.4851e-27	1.18765	0.233	0.115	3.51761e-23	ARHGAP18	7.72821e-18	-0.779362	0.037	0.16	1.8305e-13	ATP1A3	1.93248e-31	0.816358	0.618	0.424	4.57728e-27	DNAJC6	4.68204e-41	1.06843	0.423	0.303	1.10899e-36	ELFN2	2.77e-21	0.537222	0.476	0.282	6.55e-17	PTF1A	1.17775e-10	-2.26359	0.144	0.236	2.78961e-06	RCN2	2.5116e-07	0.886204	0.691	0.647	0.00594896
TPX2	1.6457e-27	-1.03671	0.143	0.262	3.898e-23	TPBG	8.97888e-18	-1.01487	0.015	0.118	2.12674e-13	GRIA1	2.34705e-31	1.2504	0.255	0.086	5.55921e-27	ZC2HC1A	7.39745e-41	0.694668	0.559	0.429	1.75216e-36	SEMA4B	2.78e-21	-0.732505	0.072	0.201	6.59e-17	BCL2L1	1.4031e-10	-0.521536	0.62	0.712	3.32339e-06	ZNF737	2.5455e-07	0.564127	0.859	0.798	0.00602928
ATF3	1.86191e-27	-0.548321	0.288	0.446	4.41011e-23	REV3L	9.3763e-18	0.695921	0.859	0.835	2.22087e-13	PPFIBP1	2.41928e-31	-0.911969	0.702	0.788	5.73031e-27	TROAP	9.96014e-41	-0.642525	0.051	0.154	2.35916e-36	WASF1	2.98e-21	0.520637	0.624	0.441	7.05e-17	CDKN3	1.85482e-10	-1.95043	0.022	0.065	4.39332e-06	SEC61A2	2.58239e-07	0.714707	0.438	0.286	0.00611664
NTM	2.04044e-27	0.837849	0.353	0.214	4.83299e-23	DSCAM	9.45599e-18	0.625341	0.479	0.284	2.23975e-13	SLC25A13	2.58005e-31	-0.579719	0.312	0.516	6.1111e-27	MCM10	1.08299e-40	-0.741579	0.071	0.179	2.56516e-36	SERPINB6	3.3e-21	-1.29714	0.18	0.34	7.82e-17	SLC1A6	2.01086e-10	0.71081	0.238	0.135	4.76292e-06	MRPS9	2.5875e-07	-0.507638	0.278	0.45	0.00612874
PDK3	2.1419e-27	-0.522983	0.783	0.849	5.07331e-23	DNAJB1	1.15851e-17	-0.714552	0.677	0.82	2.74405e-13	RAP1GAP	3.98076e-31	1.00264	0.594	0.416	9.42884e-27	ICA1L	1.09739e-40	0.512347	0.932	0.896	2.59928e-36	MRVI1	3.57e-21	-0.728447	0.095	0.234	8.45e-17	NMU	2.30208e-10	-1.21883	0.002	0.02	5.45271e-06	DACH2	2.71795e-07	1.13077	0.194	0.079	0.00643774
SLITRK2	2.24679e-27	0.637349	0.452	0.311	5.32176e-23	COL20A1	1.16486e-17	0.866026	0.641	0.491	2.75908e-13	CALD1	4.13483e-31	-1.11404	0.58	0.73	9.79375e-27	POU6F2	1.10084e-40	0.839383	0.131	0.045	2.60745e-36	CDK2AP1	3.69e-21	0.522268	0.84	0.719	8.74e-17	ASF1B	2.30464e-10	-0.843524	0.023	0.068	5.45877e-06	2021-09-03	2.73371e-07	0.783327	0.384	0.243	0.00647507
MYT1L	2.72115e-27	1.23681	0.154	0.057	6.44532e-23	IRX4	1.19642e-17	-0.905039	0.01	0.107	2.83384e-13	CSTB	4.47037e-31	-0.50113	0.485	0.714	1.05885e-26	ATAD2	1.80776e-40	-0.82067	0.164	0.296	4.28186e-36	DLL1	5.93e-21	0.669094	0.656	0.483	1.4e-16	KIF4A	2.43577e-10	-1.13033	0.017	0.056	5.76938e-06	JAZF1	2.77646e-07	-0.586962	0.081	0.217	0.00657632
LTBP1	2.84559e-27	-0.50171	0.109	0.224	6.74007e-23	EPHA3	1.33414e-17	-1.09493	0.055	0.186	3.16005e-13	DSCAM-IT1	5.4825e-31	0.846862	0.262	0.092	1.29859e-26	SPECC1	1.99138e-40	1.03522	0.607	0.526	4.71679e-36	MICAL1	6.48e-21	0.710528	0.488	0.296	1.53e-16	SPC24	2.43889e-10	-0.772532	0.012	0.046	5.77676e-06	PLK1	2.8108e-07	-1.02166	0.112	0.25	0.00665767
MICAL1	3.55711e-27	0.782957	0.488	0.357	8.42537e-23	SEMA3C	1.33998e-17	-0.730018	0.031	0.149	3.17387e-13	2021-09-10	8.10652e-31	-0.563305	0.35	0.564	1.92011e-26	PPP3CA	2.07769e-40	1.02605	0.675	0.596	4.92122e-36	RIMKLB	6.94e-21	0.667115	0.593	0.415	1.64e-16	EPB41L4A	2.44707e-10	0.527071	0.523	0.42	5.79614e-06	ST6GAL2	2.82597e-07	1.26787	0.475	0.357	0.00669359
BZW2	4.05808e-27	0.70503	0.572	0.444	9.61196e-23	CFI	1.40761e-17	-0.635251	0.207	0.385	3.33407e-13	RFTN2	1.39915e-30	0.990494	0.668	0.501	3.31402e-26	PKIA	2.0937e-40	0.667614	0.57	0.442	4.95914e-36	2021-03-03	7.1e-21	-1.0292	0.095	0.23	1.68e-16	ARAP2	2.48688e-10	-0.866571	0.11	0.191	5.89043e-06	MDM4	2.82965e-07	0.85538	0.994	0.981	0.00670232
RAB3C	4.45874e-27	0.963606	0.144	0.048	1.0561e-22	METTL7B	1.63055e-17	-1.31672	0.05	0.179	3.86211e-13	SRGAP3	1.49836e-30	0.760767	0.585	0.398	3.54901e-26	CLSTN2	2.25757e-40	1.05079	0.208	0.101	5.34729e-36	NPL	7.99e-21	-0.92089	0.07	0.196	1.89e-16	PCDHA10	2.56193e-10	0.6317	0.168	0.079	6.06819e-06	IDH1	2.88871e-07	-0.622249	0.216	0.39	0.0068422
ZDHHC22	5.0984e-27	0.665565	0.431	0.28	1.20761e-22	ZNF462	2.5682e-17	0.953887	0.812	0.83	6.08305e-13	B4GALT1	1.52235e-30	-0.995104	0.156	0.337	3.60583e-26	SSX6	2.53628e-40	-2.37027	0.001	0.061	6.00743e-36	CHN2	8.39e-21	-1.43355	0.046	0.155	1.99e-16	EFEMP1	2.65123e-10	-1.82563	0.105	0.181	6.27971e-06	SNX10	2.92611e-07	1.20863	0.228	0.105	0.00693078
TCF12	5.40193e-27	0.506357	0.935	0.883	1.2795e-22	WDR49	2.6215e-17	-0.846094	0.027	0.137	6.20929e-13	SRRM2	1.96276e-30	0.54937	0.956	0.965	4.649e-26	KIF3C	3.15458e-40	1.00456	0.448	0.331	7.47193e-36	SUMF2	8.62e-21	-0.671461	0.604	0.758	2.04e-16	SEPP1	2.88501e-10	-1.6192	0.029	0.076	6.83344e-06	PLXNA3	2.95048e-07	1.17133	0.403	0.264	0.00698852
CYR61	6.28228e-27	-1.08366	0.221	0.357	1.48802e-22	SPARC	2.69088e-17	-0.940117	0.467	0.615	6.37362e-13	GDI1	2.04764e-30	0.595779	0.929	0.896	4.85005e-26	ANKS1B	3.76028e-40	1.01197	0.387	0.261	8.90659e-36	PCMTD2	8.74e-21	0.515257	0.699	0.524	2.07e-16	CENPE	3.05362e-10	-0.6141	0.018	0.057	7.23279e-06	DIO2	3.08985e-07	1.75698	0.259	0.131	0.00731861
GDF15	6.60008e-27	-1.95748	0.045	0.129	1.56329e-22	ASPA	2.95604e-17	-1.0704	0.009	0.102	7.00167e-13	SAPCD2	2.2239e-30	1.13906	0.546	0.372	5.26754e-26	DLX6	3.82073e-40	1.79413	0.078	0.016	9.04977e-36	ADAM22	1.06e-20	0.86236	0.666	0.513	2.52e-16	ADAMTSL2	3.17266e-10	0.749364	0.44	0.358	7.51476e-06	ZC2HC1A	3.25276e-07	0.959889	0.478	0.345	0.00770449
STXBP1	6.82251e-27	0.865773	0.504	0.378	1.61598e-22	SOD2	3.31534e-17	-1.38081	0.261	0.466	7.85271e-13	MSN	2.39027e-30	-0.553327	0.552	0.718	5.66158e-26	TFAP2C	5.07839e-40	-1.18853	0.009	0.079	1.20287e-35	ZNF664	1.19e-20	0.6614	0.634	0.468	2.81e-16	FABP7	3.17686e-10	1.22728	0.174	0.085	7.52472e-06	PAK3	3.43045e-07	0.781616	0.194	0.079	0.00812535
ST8SIA3	7.28676e-27	0.90111	0.136	0.044	1.72594e-22	TNFRSF14	3.45222e-17	-0.81312	0.029	0.143	8.17694e-13	DSCAML1	2.71504e-30	0.883604	0.485	0.298	6.43083e-26	CELF4	6.39973e-40	0.903589	0.545	0.442	1.51584e-35	TOB2	1.2e-20	-0.630745	0.371	0.552	2.84e-16	HIST1H1C	3.27105e-10	-0.512051	0.376	0.489	7.74781e-06	HHIP	3.49162e-07	0.972067	0.391	0.241	0.00827026
GNAI1	7.88781e-27	0.830048	0.306	0.176	1.86831e-22	BOP1	3.62403e-17	-1.25612	0.238	0.398	8.58388e-13	P4HA2	2.76996e-30	-1.18127	0.026	0.143	6.56093e-26	JMJD1C	8.52559e-40	0.690451	0.8	0.782	2.01937e-35	ACAP3	1.56e-20	0.618794	0.572	0.373	3.69e-16	AGAP7	3.57073e-10	0.577942	0.272	0.168	8.45762e-06	ARMCX3	3.49811e-07	0.687996	0.447	0.293	0.00828563
BEX2	9.00797e-27	0.581633	0.384	0.251	2.13363e-22	CLDN10	3.71557e-17	-1.15664	0.136	0.287	8.8007e-13	PEAK1	2.83677e-30	0.933989	0.785	0.7	6.71918e-26	ZNF286A	8.66239e-40	0.95217	0.777	0.725	2.05177e-35	EVA1A	1.7e-20	-1.36072	0.01	0.081	4.03e-16	BLVRB	3.82252e-10	-1.20431	0.064	0.129	9.05403e-06	SCHIP1	3.57068e-07	1.36986	0.372	0.228	0.00845752
STOX2	1.02794e-26	0.64452	0.349	0.213	2.43478e-22	MIA	4.02975e-17	-1.93011	0.02	0.123	9.54486e-13	S1PR1	3.32512e-30	-0.625981	0.108	0.285	7.87587e-26	CCNB2	8.73816e-40	-0.588517	0.102	0.224	2.06972e-35	NMNAT2	1.89e-20	0.685491	0.454	0.275	4.47e-16	HSPB8	3.85126e-10	-1.10386	0.02	0.061	9.1221e-06	ICA1L	3.57682e-07	0.52104	0.872	0.845	0.00847205
TFAP2A	1.06982e-26	0.514838	0.244	0.124	2.53397e-22	ZNRF3-AS1	4.69305e-17	0.578562	0.918	0.901	1.11159e-12	STMN4	5.05514e-30	1.13475	0.514	0.327	1.19736e-25	GATS	8.88395e-40	0.951914	0.428	0.297	2.10425e-35	TAX1BP1	1.92e-20	-0.662215	0.707	0.805	4.56e-16	CRYAB	3.88842e-10	-1.87552	0.394	0.482	9.21011e-06	UNC45A	3.6207e-07	1.06424	0.469	0.326	0.00857599
SERPINE1	1.15737e-26	-1.48909	0.137	0.25	2.74134e-22	PFKP	4.70644e-17	-0.549366	0.289	0.476	1.11477e-12	COBL	5.4225e-30	0.982014	0.454	0.262	1.28437e-25	GCNT2	1.04494e-39	1.73161	0.25	0.14	2.47505e-35	TPD52	2.12e-20	-1.07578	0.134	0.28	5.02e-16	CENPV	3.89734e-10	0.728243	0.145	0.062	9.23123e-06	KLHL24	3.62703e-07	0.578149	0.744	0.647	0.00859099
FAM115A	1.35148e-26	0.590413	0.821	0.74	3.20112e-22	ASTN1	5.41037e-17	0.827928	0.712	0.619	1.2815e-12	KCNJ10	7.4243e-30	0.590103	0.727	0.55	1.75852e-25	FHIT	1.1258e-39	-0.636129	0.157	0.293	2.66656e-35	RAMP1	2.21e-20	-0.656095	0.618	0.725	5.23e-16	PCDHA4	3.92753e-10	0.713739	0.276	0.172	9.30275e-06	LIG1	3.66109e-07	-0.537109	0.288	0.457	0.00867165
FAM110B	1.44639e-26	0.801244	0.667	0.557	3.42593e-22	PACRG	5.58598e-17	-0.54198	0.079	0.217	1.3231e-12	NRN1	7.85139e-30	2.73	0.13	0.013	1.85968e-25	PNMA2	1.16248e-39	0.743574	0.806	0.757	2.75345e-35	ARF3	2.57e-20	0.532883	0.693	0.519	6.08e-16	PSTPIP1	3.9424e-10	0.683158	0.237	0.135	9.33796e-06	GLI2	3.92787e-07	0.585868	0.197	0.083	0.00930355
PLOD2	1.55143e-26	-0.957531	0.416	0.559	3.67472e-22	LDHA	5.64156e-17	-0.629046	0.74	0.879	1.33626e-12	TANC2	8.53523e-30	0.676924	0.717	0.568	2.02165e-25	PAM	1.22105e-39	1.2875	0.455	0.348	2.89219e-35	PDLIM3	2.64e-20	-1.26536	0.043	0.148	6.25e-16	PLOD2	4.00768e-10	-0.522637	0.083	0.155	9.4926e-06	PRSS21	3.96888e-07	-0.911714	0.034	0.143	0.00940069
ATP8A1	1.5684e-26	0.740482	0.285	0.162	3.71492e-22	NOV	6.36669e-17	-0.830254	0.041	0.161	1.50801e-12	MARCKSL1	9.15471e-30	0.586064	0.868	0.783	2.16839e-25	FAM84B	1.26249e-39	-1.02114	0.414	0.543	2.99033e-35	HLA-A	2.75e-20	-0.62411	0.697	0.798	6.51e-16	BARD1	4.47663e-10	-0.605998	0.095	0.171	1.06034e-05	NAP1L3	4.15049e-07	1.20031	0.309	0.171	0.00983084
ST3GAL5	1.72632e-26	1.021	0.411	0.272	4.08896e-22	PLXNB2	6.43558e-17	-1.86936	0.598	0.754	1.52433e-12	SLC25A27	9.65449e-30	1.63957	0.339	0.159	2.28676e-25	BSCL2	1.28995e-39	1.12415	0.542	0.461	3.05538e-35	DCAF16	2.83e-20	0.580937	0.85	0.805	6.71e-16	NUF2	4.75705e-10	-1.61888	0.048	0.106	1.12676e-05	FLJ35946	2.29127e-16	1.33209	0.325	0.109	5.4271e-12
TMEM35	1.84713e-26	1.11928	0.24	0.121	4.3751e-22	ZNF536	6.56843e-17	-0.903654	0.052	0.179	1.5558e-12	LRRTM3	1.07161e-29	1.1335	0.378	0.191	2.53821e-25	NYAP2	1.65002e-39	0.849222	0.697	0.64	3.90824e-35	FOS	3.26e-20	-0.617949	0.639	0.766	7.73e-16	CDK1	4.94682e-10	-1.44999	0.022	0.064	1.1717e-05
ATP10B	1.9921e-26	0.737703	0.149	0.054	4.71848e-22	NRP1	6.82057e-17	-1.42561	0.147	0.3	1.61552e-12	SLC38A1	1.29171e-29	0.641608	0.843	0.758	3.05956e-25	CDK1	1.7071e-39	-0.752684	0.105	0.226	4.04343e-35	PLK1S1	3.35e-20	0.510841	0.662	0.477	7.93e-16	TGIF1	5.07174e-10	-0.96083	0.119	0.201	1.20129e-05
GDAP1L1	2.0751e-26	0.636207	0.301	0.169	4.91508e-22	MOK	6.85885e-17	-0.593741	0.234	0.403	1.62459e-12	SLITRK2	1.46095e-29	0.849345	0.7	0.53	3.46041e-25	GDPD1	1.74433e-39	0.71171	0.843	0.811	4.13162e-35	KCNN3	3.66e-20	-1.0467	0.711	0.8	8.67e-16	PPFIA2	5.81309e-10	0.502115	0.562	0.459	1.37689e-05
RFX2	2.18756e-26	-0.639683	0.136	0.255	5.18145e-22	TRAPPC2	6.93998e-17	0.617136	0.993	0.988	1.6438e-12	VASH1	1.50936e-29	0.710223	0.529	0.342	3.57506e-25	C3	6.32199e-39	-1.03593	0.022	0.102	1.49743e-34	ANKRD36BP1	3.81e-20	0.60313	0.508	0.33	9.02e-16	BUB1	6.37707e-10	-1.5273	0.024	0.066	1.51047e-05
MAGEH1	2.30485e-26	0.647422	0.461	0.323	5.45927e-22	TAPBPL	7.16527e-17	-1.24695	0.068	0.2	1.69717e-12	PODN	1.57937e-29	0.942304	0.254	0.088	3.74089e-25	FOXS1	7.49034e-39	1.26025	0.112	0.035	1.77416e-34	PSMB9	4.67e-20	-1.28443	0.07	0.192	1.11e-15	ASPM	6.93853e-10	-0.790923	0.024	0.068	1.64346e-05
ABCC5	2.33892e-26	0.706037	0.611	0.487	5.53996e-22	TIFA	7.61451e-17	-0.943053	0.003	0.087	1.80357e-12	SNAP25	1.72828e-29	1.53842	0.351	0.17	4.0936e-25	TSPAN13	7.82559e-39	1.56496	0.257	0.148	1.85357e-34	CTDSP2	4.75e-20	0.624839	0.512	0.318	1.13e-15	TNC	8.35934e-10	-0.885661	0.204	0.293	1.97999e-05
DOCK10	2.39761e-26	0.691583	0.498	0.368	5.67897e-22	GFPT2	8.50777e-17	-1.18306	0.121	0.278	2.01515e-12	ST3GAL4	1.77887e-29	-0.86299	0.056	0.196	4.21344e-25	DHFR	8.09301e-39	-0.931965	0.203	0.332	1.91691e-34	CYSTM1	5.21e-20	-1.28467	0.056	0.168	1.23e-15	PDGFRB	8.36263e-10	-0.564093	0.042	0.097	1.98077e-05
EPN2	2.44348e-26	0.66577	0.831	0.77	5.78763e-22	MTTP	8.86328e-17	-1.15477	0.014	0.11	2.09936e-12	SEMA3E	1.97429e-29	1.08872	0.656	0.517	4.67631e-25	NRXN2	8.55217e-39	0.536293	0.209	0.103	2.02567e-34	COPS6	5.23e-20	-0.552319	0.636	0.753	1.24e-15	POC1A	9.3491e-10	-1.02746	0.019	0.057	2.21443e-05
LBH	2.50933e-26	1.01395	0.368	0.241	5.9436e-22	PSMG1	1.00969e-16	-0.576966	0.166	0.342	2.39155e-12	KCNA2	2.25125e-29	1.41936	0.381	0.199	5.3323e-25	FAM110B	1.10763e-38	0.846023	0.396	0.272	2.62353e-34	CCM2L	5.3e-20	-0.630607	0.015	0.092	1.26e-15	TOP2A	9.57476e-10	-2.05148	0.035	0.084	2.26788e-05
CCDC74B	3.45539e-26	-0.759098	0.064	0.157	8.18444e-22	IFI6	1.14213e-16	-0.707975	0.418	0.572	2.70525e-12	CDR1	2.74262e-29	0.889558	0.815	0.781	6.49618e-25	AGPAT4	1.16769e-38	0.803651	0.41	0.286	2.7658e-34	TMEM255A	6.95e-20	-0.664761	0.219	0.391	1.65e-15	MKI67	1.12109e-09	-1.09625	0.042	0.094	2.65542e-05
AQP4	3.45857e-26	-0.714673	0.335	0.504	8.19197e-22	DAB2	1.17968e-16	-0.725812	0.097	0.241	2.79418e-12	MOB1A	2.85647e-29	-0.656163	0.284	0.49	6.76584e-25	MTSS1	1.4995e-38	0.580529	0.729	0.647	3.55172e-34	AFAP1L2	7.11e-20	0.863682	0.618	0.477	1.69e-15	NID1	1.16052e-09	-1.10552	0.046	0.102	2.7488e-05
ETV1	3.68688e-26	0.893852	0.835	0.793	8.73275e-22	TUBB4A	1.21843e-16	0.997114	0.49	0.322	2.88597e-12	RBPJ	3.11323e-29	0.657957	0.883	0.797	7.37399e-25	NDST3	1.5408e-38	1.03249	0.372	0.265	3.64954e-34	GLIPR2	9.78e-20	-0.808184	0.177	0.34	2.32e-15	DYRK1B	1.2355e-09	0.555013	0.311	0.205	2.9264e-05
RTN4	4.36563e-26	0.56924	0.872	0.818	1.03404e-21	CKS2	1.24013e-16	-0.587525	0.288	0.476	2.93737e-12	RNF144A	3.29429e-29	0.694123	0.791	0.643	7.80287e-25	SPTAN1	1.61692e-38	0.574948	0.791	0.793	3.82983e-34	ARHGEF17	1.13e-19	-0.516719	0.137	0.293	2.68e-15	SFRP2	1.2736e-09	-1.69205	0.009	0.037	3.01665e-05
C20orf112	4.62665e-26	0.703638	0.638	0.522	1.09587e-21	GPR17	1.39802e-16	1.01272	0.355	0.188	3.31134e-12	GPC3	4.20795e-29	-1.11144	0.115	0.279	9.96694e-25	SLC17A6	1.89843e-38	1.89425	0.171	0.076	4.49662e-34	CASQ1	1.18e-19	-0.951665	0.089	0.22	2.81e-15	TIMP3	1.32573e-09	-1.68041	0.171	0.256	3.14013e-05
IP6K2	4.95457e-26	0.510138	0.85	0.806	1.17354e-21	S100A11	1.43676e-16	-1.36561	0.096	0.24	3.40311e-12	ZNF662	4.40839e-29	0.858499	0.761	0.674	1.04417e-24	SRGAP2	2.52342e-38	0.903788	0.532	0.424	5.97697e-34	PHF19	1.3e-19	-0.935433	0.103	0.24	3.08e-15	TPX2	1.39607e-09	-1.88222	0.049	0.104	3.30674e-05
DNER	5.25297e-26	0.709441	0.468	0.331	1.24422e-21	FAM198B	1.56437e-16	-0.621085	0.041	0.159	3.70536e-12	ABI3BP	5.64322e-29	-0.946809	0.058	0.197	1.33665e-24	CELF5	2.88993e-38	0.534595	0.171	0.073	6.8451e-34	GNG12	1.39e-19	-0.773049	0.034	0.13	3.28e-15	CKAP2L	1.44694e-09	-0.955078	0.016	0.052	3.42721e-05
GPI	5.2655e-26	-0.605031	0.989	0.992	1.24719e-21	SLC12A4	1.61809e-16	-0.932068	0.245	0.427	3.83261e-12	CCDC80	5.66308e-29	-1.14245	0.103	0.263	1.34136e-24	CLDN1	3.31172e-38	1.13433	0.166	0.072	7.84414e-34	RGS9	1.58e-19	-1.41084	0.047	0.151	3.74e-15	HIST1H1B	1.71431e-09	-0.642655	0.028	0.073	4.0605e-05
CTNNA2	5.50077e-26	0.501425	0.535	0.391	1.30291e-21	DNPEP	1.62071e-16	-0.551746	0.184	0.346	3.83881e-12	MDGA2	7.38754e-29	0.954316	0.346	0.159	1.74981e-24	ZNF521	3.43802e-38	1.04667	0.336	0.213	8.14329e-34	CHD4	1.89e-19	0.510527	0.72	0.57	4.48e-15	CSGALNACT1	1.91245e-09	-0.787256	0.11	0.187	4.52983e-05
VAMP5	5.54027e-26	-0.529074	0.141	0.262	1.31227e-21	PCK2	1.82209e-16	-1.06693	0.02	0.12	4.3158e-12	SERPINH1	7.46367e-29	-1.10587	0.214	0.391	1.76784e-24	KIFC1	4.26201e-38	-0.636285	0.066	0.17	1.0095e-33	RHOU	2.25e-19	-0.839001	0.198	0.365	5.32e-15	CASC5	2.19163e-09	-0.881518	0.038	0.088	5.1911e-05
C16orf45	6.74085e-26	0.562735	0.733	0.649	1.59664e-21	ELAVL4	2.01166e-16	0.858268	0.367	0.195	4.76482e-12	SOX9	8.27084e-29	-0.59393	0.172	0.357	1.95903e-24	C16orf45	5.13135e-38	0.752936	0.556	0.452	1.21541e-33	KLF12	2.47e-19	0.505642	0.611	0.436	5.86e-15	CASD1	2.25019e-09	0.570875	0.475	0.371	5.3298e-05
CPT1C	6.75091e-26	0.627234	0.509	0.377	1.59902e-21	NME5	2.16049e-16	-1.02093	0.041	0.158	5.11734e-12	PROS1	9.21811e-29	-1.06225	0.166	0.346	2.1834e-24	CCDC60	5.53695e-38	-1.30338	0.004	0.065	1.31148e-33	TMEM196	2.98e-19	0.983731	0.213	0.067	7.05e-15	ADHFE1	2.2821e-09	-1.02903	0.241	0.339	5.40537e-05
BLVRB	7.48758e-26	-0.704899	0.123	0.238	1.77351e-21	TRIO	2.1724e-16	0.585235	0.871	0.825	5.14554e-12	ADAM15	9.93401e-29	-0.55254	0.439	0.637	2.35297e-24	FOXM1	5.81483e-38	-0.504017	0.118	0.234	1.3773e-33	PELI1	3.1e-19	0.853726	0.426	0.253	7.34e-15	FUCA2	2.29862e-09	-0.833118	0.065	0.127	5.44452e-05
NID1	8.55197e-26	-0.545394	0.28	0.434	2.02562e-21	TRPM3	2.21896e-16	-0.710029	0.028	0.135	5.25583e-12	RIT1	1.04544e-28	-0.523028	0.372	0.571	2.47622e-24	TRIM2	5.96034e-38	0.905602	0.56	0.462	1.41177e-33	PREX1	3.32e-19	-0.863617	0.06	0.173	7.86e-15	LPL	2.42878e-09	-1.29301	0.065	0.129	5.7528e-05
CSMD1	8.98139e-26	0.553749	0.567	0.441	2.12733e-21	FAH	2.45687e-16	-0.786973	0.022	0.124	5.81934e-12	NOV	1.05e-28	-1.57307	0.013	0.112	2.48703e-24	HCAR3	6.1859e-38	1.41671	0.068	0.012	1.46519e-33	PEAK1	3.45e-19	0.622079	0.829	0.775	8.18e-15	KCNAB1	2.64778e-09	0.572715	0.187	0.098	6.27154e-05
CDK2	1.03545e-25	-0.524551	0.283	0.424	2.45257e-21	CA2	2.49896e-16	-0.538158	0.075	0.214	5.91904e-12	CD59	1.05138e-28	-0.652836	0.514	0.68	2.4903e-24	UBASH3B	6.54254e-38	1.1691	0.172	0.077	1.54967e-33	RIMS2	3.51e-19	0.605194	0.653	0.489	8.32e-15	PRLHR	2.71572e-09	-1.09006	0.036	0.085	6.43246e-05
SPC24	1.0906e-25	-0.78851	0.058	0.146	2.58319e-21	GIMAP8	2.56714e-16	-0.92202	0.005	0.087	6.08053e-12	FKBP9	1.06549e-28	-0.67752	0.694	0.798	2.52373e-24	ELK2AP	8.46768e-38	0.702233	0.101	0.03	2.00566e-33	TMEM198B	4.43e-19	0.527129	0.474	0.294	1.05e-14	CKMT1A	2.73859e-09	0.561762	0.266	0.163	6.48661e-05
AK4	1.13286e-25	-0.557396	0.473	0.604	2.68329e-21	PGK1	2.71883e-16	-0.842476	0.871	0.961	6.43983e-12	FSTL1	1.14098e-28	-0.541862	0.152	0.335	2.70253e-24	PRDM8	8.74388e-38	0.686257	0.312	0.19	2.07108e-33	PCDHA11	4.72e-19	0.881265	0.249	0.098	1.12e-14	SNX20	2.89629e-09	0.707233	0.24	0.148	6.86016e-05
MCF2L	1.20214e-25	0.548515	0.373	0.237	2.8474e-21	WSCD1	2.88383e-16	0.882888	0.585	0.464	6.83064e-12	CD24	1.23399e-28	0.516264	0.877	0.746	2.92283e-24	MYT1L	8.825e-38	0.538151	0.623	0.504	2.09029e-33	ZFP36L1	5.31e-19	-0.723694	0.63	0.77	1.26e-14	FAM163B	3.11877e-09	0.829752	0.089	0.027	7.38712e-05
FGFRL1	1.70709e-25	-0.514669	0.121	0.234	4.04342e-21	WISP1	2.97844e-16	-1.08993	0.002	0.081	7.05473e-12	FXYD6	1.2927e-28	0.607151	0.936	0.856	3.06188e-24	SCD5	1.60331e-37	0.670153	0.957	0.939	3.7976e-33	DIP2B	5.62e-19	0.73126	0.561	0.406	1.33e-14	HES4	3.19844e-09	-0.679515	0.08	0.148	7.57584e-05
DPYSL3	2.58292e-25	0.573093	0.78	0.703	6.11791e-21	PSD3	3.5822e-16	0.668515	0.805	0.741	8.48481e-12	ZNF385A	1.42894e-28	-0.994302	0.061	0.198	3.3846e-24	CENPW	1.87981e-37	-0.853278	0.14	0.268	4.45253e-33	OLFM2	5.76e-19	0.85688	0.441	0.261	1.36e-14	RASGEF1C	3.97122e-09	0.652294	0.157	0.078	9.40624e-05
SMIM18	2.72839e-25	1.08516	0.178	0.077	6.46247e-21	ZNF423	3.5986e-16	-1.80697	0.193	0.339	8.52365e-12	RXRG	1.6149e-28	-1.17447	0.03	0.147	3.82504e-24	NGFR	2.21608e-37	0.814046	0.108	0.034	5.249e-33	PGAP1	5.83e-19	0.606794	0.72	0.632	1.38e-14	CSDC2	4.03901e-09	-1.24445	0.027	0.07	9.5668e-05
PDE4B	3.22987e-25	0.571997	0.772	0.668	7.65027e-21	CTHRC1	4.08865e-16	0.750808	0.591	0.463	9.68438e-12	CCDC144B	1.63321e-28	0.558815	0.955	0.937	3.86843e-24	PPP1R17	2.44841e-37	1.35992	0.13	0.048	5.7993e-33	IL17D	6.08e-19	-0.968982	0.05	0.155	1.44e-14	IL1RAPL1	5.19928e-09	0.585131	0.448	0.352	0.00012315
FAM129A	3.29409e-25	-0.529689	0.32	0.445	7.80238e-21	NFKBIZ	4.39324e-16	-0.660884	0.301	0.498	1.04058e-11	MTMR9LP	2.13078e-28	1.23834	0.263	0.099	5.04696e-24	CD200	2.63394e-37	0.838092	0.285	0.164	6.23876e-33	SF3A1	6.62e-19	-0.707798	0.696	0.817	1.57e-14	SCNN1D	6.00181e-09	0.506063	0.445	0.338	0.000142159
NOL4	3.62655e-25	0.628226	0.361	0.224	8.58986e-21	GPI	4.48285e-16	-0.524812	0.991	0.994	1.06181e-11	LGALS3	2.21531e-28	-1.77747	0.112	0.269	5.24717e-24	MBNL2	3.00398e-37	0.996328	0.558	0.456	7.11522e-33	MEPCE	7.68e-19	-0.719937	0.174	0.332	1.82e-14	GLIPR2	6.28582e-09	-0.743012	0.152	0.233	0.000148886
RAPGEF4	3.79284e-25	1.28026	0.357	0.236	8.98373e-21	SMOC1	4.60488e-16	0.866891	0.55	0.376	1.09071e-11	NPAS3	2.35571e-28	0.897755	0.429	0.238	5.57973e-24	SYNE2	3.27518e-37	0.703372	0.802	0.76	7.75758e-33	JUN	8.17e-19	-0.616821	0.51	0.653	1.94e-14	CDC25C	6.31079e-09	-0.576991	0.012	0.042	0.000149477
PBK	3.83303e-25	-0.614919	0.111	0.221	9.07891e-21	DLGAP1	4.70626e-16	1.0688	0.643	0.497	1.11472e-11	PKD1P1	3.63734e-28	0.68546	0.874	0.867	8.61541e-24	DLG4	3.48412e-37	0.972163	0.293	0.18	8.25248e-33	KIAA0922	9.71e-19	0.611049	0.254	0.098	2.3e-14	RNF19A	6.44179e-09	-0.578385	0.419	0.518	0.00015258
RAB33A	4.12808e-25	0.947822	0.185	0.082	9.77778e-21	PLXDC2	5.39955e-16	-0.567386	0.101	0.245	1.27894e-11	HDHD3	4.10697e-28	-0.723043	0.058	0.196	9.72777e-24	UNC5C	4.00322e-37	1.18522	0.309	0.195	9.48203e-33	UPK3BL	1.02e-18	-0.563762	0.735	0.833	2.42e-14	CDC20	6.62514e-09	-2.06593	0.026	0.068	0.000156923
ABCC8	4.37564e-25	0.589867	0.168	0.069	1.03641e-20	MRPS18A	6.05271e-16	-0.694144	0.411	0.584	1.43364e-11	GALNT2	4.84293e-28	-0.675775	0.605	0.778	1.1471e-23	WDFY3	4.23412e-37	0.688988	0.527	0.416	1.00289e-32	SOGA3	1.07e-18	0.588674	0.442	0.262	2.53e-14	EDNRA	6.76949e-09	-0.84686	0.033	0.078	0.000160342
GLI1	4.4392e-25	-0.998291	0.014	0.071	1.05147e-20	PCOLCE	6.35119e-16	-2.32073	0.089	0.223	1.50434e-11	SNRNP70	6.0798e-28	0.755104	0.687	0.579	1.44006e-23	TK1	4.40986e-37	-0.653104	0.087	0.196	1.04452e-32	S100A6	1.11e-18	-1.0025	0.336	0.492	2.63e-14	ESCO2	6.77127e-09	-0.789654	0.017	0.052	0.000160384
RAB3IP	5.20694e-25	1.09893	0.854	0.792	1.23332e-20	HGF	6.97755e-16	-0.958396	0.111	0.256	1.6527e-11	ZBTB20	6.31202e-28	0.702385	0.823	0.737	1.49506e-23	FAP	4.66497e-37	0.88259	0.294	0.175	1.10494e-32	LHX2	1.13e-18	-0.733691	0.063	0.176	2.67e-14	HOMER1	8.51549e-09	0.641405	0.207	0.121	0.000201698
CLIP2	6.30798e-25	0.522457	0.778	0.693	1.49411e-20	HSPA2	7.34646e-16	-0.777998	0.161	0.323	1.74008e-11	REV3L	6.43912e-28	0.933059	0.764	0.648	1.52517e-23	CENPM	6.0741e-37	-0.746348	0.088	0.199	1.43871e-32	GMNN	1.35e-18	-1.07028	0.137	0.277	3.2e-14	C8orf4	8.54675e-09	-0.975634	0.092	0.162	0.000202438
SUV39H1	6.90208e-25	-0.681127	0.166	0.289	1.63483e-20	C14orf180	7.39768e-16	-4.32251	0.013	0.101	1.75221e-11	NQO2	1.22335e-27	-0.54906	0.149	0.332	2.89764e-23	GULP1	6.79022e-37	-0.553016	0.082	0.19	1.60833e-32	BCL6	1.38e-18	0.506065	0.761	0.628	3.27e-14	NEIL3	9.02948e-09	-0.999464	0.012	0.042	0.000213872
ITM2A	7.15045e-25	0.980653	0.141	0.05	1.69366e-20	FZD7	7.55992e-16	-0.552262	0.064	0.194	1.79064e-11	FN1	1.23044e-27	-2.688	0.219	0.382	2.91442e-23	TSC22D3	8.10757e-37	0.802394	0.375	0.258	1.92036e-32	MGLL	1.74e-18	-0.726569	0.106	0.24	4.11e-14	STON2	9.1333e-09	-1.13481	0.554	0.629	0.000216331
WIPI1	7.87177e-25	-0.909513	0.108	0.213	1.86451e-20	MIPEP	8.08389e-16	-0.844296	0.09	0.228	1.91475e-11	RAPGEF4	1.37808e-27	0.721133	0.428	0.231	3.26412e-23	HN1	8.40162e-37	0.52996	0.816	0.782	1.99001e-32	THBS1	1.81e-18	-1.27681	0.021	0.099	4.29e-14	MKX	9.34765e-09	-0.501911	0.004	0.024	0.000221408
CDK5R1	8.1021e-25	0.888237	0.278	0.159	1.91906e-20	SELL	8.4501e-16	-1.67404	0.003	0.082	2.00149e-11	C1QTNF3	1.45533e-27	-2.17876	0.228	0.392	3.44709e-23	HIVEP3	8.51726e-37	0.744966	0.361	0.241	2.0174e-32	CDH13	1.88e-18	0.535764	0.558	0.373	4.46e-14	SVIP	9.60166e-09	-0.510581	0.046	0.098	0.000227425
PCMTD2	1.00268e-24	0.652883	0.741	0.666	2.37494e-20	SYNGR2	9.17589e-16	-0.550066	0.055	0.177	2.1734e-11	LRRK2	1.72823e-27	0.867172	0.535	0.342	4.0935e-23	SGCB	8.51772e-37	0.7382	0.839	0.804	2.01751e-32	C2orf27A	2.01e-18	0.680765	0.549	0.372	4.76e-14	TTK	1.07477e-08	-1.03823	0.01	0.038	0.00025457
FGF12	1.00655e-24	1.33883	0.257	0.142	2.38412e-20	STOM	1.01467e-15	-0.711161	0.552	0.663	2.40336e-11	MYO1B	1.73409e-27	-0.618834	0.108	0.267	4.10736e-23	ZNF626	1.35379e-36	0.640458	0.769	0.718	3.20659e-32	NELL2	2.26e-18	0.762129	0.323	0.159	5.34e-14	NDC80	1.21975e-08	-1.26622	0.024	0.062	0.00028891
PTBP2	1.01247e-24	0.684108	0.691	0.602	2.39813e-20	AKAP6	1.11051e-15	0.773398	0.589	0.448	2.63036e-11	ANLN	1.74689e-27	-0.920016	0.106	0.262	4.13769e-23	NFIX	1.43057e-36	0.549476	0.68	0.603	3.38845e-32	HIF1A	2.68e-18	-0.613457	0.727	0.828	6.34e-14	TRIP10	1.25721e-08	-0.51324	0.054	0.11	0.000297783
GRIK4	1.04536e-24	0.532192	0.189	0.086	2.47604e-20	ADAM15	1.25524e-15	-0.640663	0.295	0.469	2.97317e-11	DUSP14	2.04828e-27	-0.568415	0.152	0.336	4.85155e-23	FLCN	2.53946e-36	0.634833	0.786	0.742	6.01495e-32	APCDD1	2.83e-18	-0.67656	0.448	0.599	6.71e-14	PDZRN4	1.38725e-08	0.812113	0.125	0.055	0.000328583
UBE2C	1.0691e-24	-0.863744	0.129	0.239	2.53227e-20	TACC2	1.3214e-15	0.921681	0.617	0.506	3.12988e-11	TNFAIP6	2.68313e-27	-1.77314	0.025	0.132	6.35527e-23	CADM3	3.5087e-36	0.626066	0.622	0.54	8.31072e-32	PPP1R12A	3.46e-18	0.524524	0.846	0.721	8.2e-14	RNASEH2B	1.4946e-08	-0.600361	0.269	0.364	0.00035401
LOC643669	1.46204e-24	0.764099	0.228	0.116	3.46299e-20	SOX5	1.37688e-15	1.00344	0.766	0.737	3.26128e-11	GBA	2.7427e-27	-0.650944	0.367	0.572	6.49635e-23	ATAT1	3.69057e-36	0.936556	0.618	0.575	8.74149e-32	TMEM132A	3.8e-18	-0.713285	0.269	0.431	9.01e-14	TFPI	1.80903e-08	-1.15033	0.04	0.087	0.000428486
CNP	1.50141e-24	0.533394	0.876	0.836	3.55624e-20	ITGA5	1.40856e-15	-1.06033	0.127	0.273	3.33631e-11	FIP1L1	3.1068e-27	1.26472	0.762	0.657	7.35876e-23	HIST1H1B	4.59593e-36	-0.911088	0.054	0.149	1.08859e-31	KIAA1109	4.07e-18	0.500956	0.48	0.303	9.65e-14	CYP2J2	1.82149e-08	-0.905503	0.008	0.033	0.000431438
CCNB1	1.58537e-24	-1.19336	0.122	0.229	3.75512e-20	CHGB	1.43345e-15	1.52534	0.227	0.095	3.39526e-11	ICA1L	3.13968e-27	0.552777	0.928	0.896	7.43666e-23	DUSP8	4.67087e-36	0.555496	0.227	0.122	1.10634e-31	ANGEL1	4.29e-18	0.592545	0.702	0.573	1.02e-13	CASP7	1.83327e-08	-0.834296	0.016	0.048	0.000434228
CXCR4	1.80279e-24	-0.864253	0.076	0.171	4.27009e-20	TLE6	1.47029e-15	-1.97715	0.084	0.214	3.48254e-11	SCN1A	3.58918e-27	1.1711	0.532	0.367	8.50134e-23	CDH7	7.59322e-36	1.723	0.138	0.055	1.79853e-31	DHX15	5.16e-18	0.673865	0.54	0.364	1.22e-13	CDCA5	1.97074e-08	-1.00308	0.041	0.089	0.000466789
CSPG4	1.93653e-24	0.693199	0.669	0.569	4.58686e-20	ANGPTL1	1.61737e-15	-1.54728	0.113	0.252	3.83091e-11	SDC2	4.1294e-27	-1.07432	0.041	0.161	9.7809e-23	ADAMTS4	8.12781e-36	0.571253	0.791	0.753	1.92515e-31	PILRB	5.62e-18	-0.639752	0.728	0.809	1.33e-13	CSF1	2.12365e-08	-0.912149	0.097	0.164	0.000503008
BHLHE40	2.22658e-24	-0.840735	0.126	0.236	5.27387e-20	DCC	1.68775e-15	1.18799	0.444	0.286	3.99761e-11	B3GAT1	4.16976e-27	0.878455	0.528	0.366	9.87649e-23	CLSTN3	9.50959e-36	0.908922	0.381	0.262	2.25244e-31	TOMM7	6.54e-18	-0.526671	0.844	0.865	1.55e-13	GLUD1	2.20201e-08	-0.842528	0.547	0.643	0.000521569
CDH10	2.46441e-24	0.783644	0.44	0.307	5.8372e-20	TRIM48	2.02411e-15	-3.72502	0.003	0.08	4.79431e-11	SAMD9L	4.19589e-27	-0.589591	0.036	0.154	9.93839e-23	MLLT4-AS1	1.03302e-35	1.21151	0.365	0.252	2.44681e-31	JUNB	6.84e-18	-0.850474	0.439	0.587	1.62e-13	NRP1	2.34719e-08	0.710109	0.141	0.07	0.000555955
CDC25B	2.82102e-24	-0.600102	0.385	0.524	6.68187e-20	PROS1	2.18895e-15	-0.55494	0.202	0.361	5.18474e-11	MCL1	4.25725e-27	0.814787	0.8	0.778	1.00837e-22	TCERG1L	1.05862e-35	0.849545	0.203	0.102	2.50745e-31	LGR5	8.52e-18	0.738094	0.358	0.192	2.02e-13	MLF1	2.44209e-08	-0.500154	0.135	0.211	0.000578433
ICA1	3.17654e-24	0.830027	0.223	0.112	7.52394e-20	LOXL2	2.41615e-15	-0.765773	0.076	0.205	5.7229e-11	ITGA11	4.33018e-27	-2.0326	0.027	0.134	1.02565e-22	MGP	1.26648e-35	0.544901	0.417	0.3	2.99977e-31	SCG3	8.75e-18	-0.676201	0.986	0.985	2.07e-13	ELN	2.64897e-08	0.803765	0.406	0.308	0.000627436
RNF165	3.24022e-24	0.714882	0.28	0.158	7.6748e-20	NLGN3	2.59451e-15	0.656689	0.868	0.821	6.14535e-11	DPYD	4.53439e-27	-0.641337	0.135	0.301	1.07402e-22	CCNB1	1.51899e-35	-0.861302	0.108	0.223	3.59788e-31	WLS	8.89e-18	-0.591703	0.228	0.393	2.11e-13	PLA2G16	2.70839e-08	-0.546773	0.075	0.136	0.000641509
C3	4.46527e-24	-1.65114	0.026	0.093	1.05764e-19	CTNNA2	2.97392e-15	0.800887	0.502	0.339	7.04403e-11	KAZN	4.55804e-27	0.980674	0.387	0.209	1.07962e-22	CA2	1.67303e-35	-1.53542	0.014	0.081	3.96274e-31	NMB	9.21e-18	-1.13946	0.057	0.162	2.18e-13	SYTL2	2.75591e-08	-0.570389	0.087	0.154	0.000652765
RP1-177G6.2	4.93523e-24	0.77858	0.42	0.309	1.16896e-19	PPARGC1A	2.99992e-15	-0.53852	0.022	0.118	7.10562e-11	ZNF300P1	7.25851e-27	1.21973	0.271	0.106	1.71925e-22	CCSER2	1.71603e-35	0.986045	0.699	0.63	4.06458e-31	LRIG1	1.07e-17	-0.522304	0.364	0.527	2.54e-13	NUSAP1	2.89166e-08	-2.04178	0.057	0.111	0.000684919
OIP5	5.06665e-24	-0.723278	0.099	0.2	1.20009e-19	PBXIP1	3.13106e-15	-0.580883	0.221	0.39	7.41622e-11	FERMT1	8.27957e-27	0.99679	0.448	0.272	1.9611e-22	SGIP1	1.76462e-35	0.663438	0.135	0.051	4.17968e-31	HSPB1	1.21e-17	-0.823766	0.369	0.534	2.86e-13	HMMR	3.26285e-08	-0.797453	0.012	0.041	0.000772839
TCEAL5	5.07583e-24	0.675026	0.267	0.148	1.20226e-19	TAGLN	3.21287e-15	-1.85724	0.078	0.206	7.61e-11	SATB1	9.29164e-27	0.952869	0.641	0.513	2.20082e-22	B4GALNT1	1.79378e-35	0.970808	0.248	0.138	4.24875e-31	PCSK2	1.23e-17	-0.570634	0.255	0.417	2.92e-13	FAM110A	3.49596e-08	0.559913	0.219	0.134	0.000828053
FAM181A	5.65993e-24	-0.586143	0.085	0.183	1.34061e-19	HSBP1L1	3.24364e-15	-1.21643	0.023	0.12	7.68289e-11	KAT2B	9.44654e-27	1.30156	0.473	0.298	2.23751e-22	SGTB	1.87378e-35	0.696933	0.813	0.775	4.43823e-31	SPR	1.33e-17	-1.0062	0.131	0.263	3.15e-13	PCDHGA2	3.57375e-08	0.604774	0.113	0.048	0.000846478
ATRNL1	5.7534e-24	0.723926	0.193	0.088	1.36275e-19	MANBA	3.3469e-15	-0.608033	0.141	0.295	7.92747e-11	SNTG1	1.15939e-26	1.24341	0.236	0.083	2.74612e-22	CPT1C	2.27685e-35	1.07434	0.328	0.213	5.39295e-31	SFRP2	1.42e-17	-0.808967	0.006	0.061	3.36e-13	FHL3	3.58806e-08	0.720865	0.16	0.083	0.000849868
KLRC4	5.81433e-24	1.74567	0.117	0.037	1.37718e-19	ARHGAP23	3.54164e-15	-0.896821	0.275	0.435	8.38873e-11	SLC1A4	1.1607e-26	-0.702114	0.223	0.404	2.74922e-22	MAP1LC3B	2.41522e-35	0.832836	0.671	0.661	5.72069e-31	DPYSL4	1.52e-17	0.62897	0.484	0.303	3.6e-13	KIAA0087	3.60968e-08	0.530149	0.423	0.345	0.00085499
CNRIP1	6.31768e-24	0.732369	0.491	0.364	1.49641e-19	CMTM8	3.72888e-15	-1.28637	0.023	0.119	8.83221e-11	ANXA1	1.26719e-26	-2.7129	0.019	0.118	3.00146e-22	ATRX	3.62102e-35	0.535595	0.871	0.877	8.57676e-31	SH3D19	1.58e-17	0.574797	0.427	0.242	3.73e-13	AHCYL1	3.82026e-08	-0.859754	0.835	0.865	0.000904866
NPPA	7.5212e-24	0.88984	0.19	0.091	1.78147e-19	HMGCL	4.24765e-15	-0.576145	0.128	0.277	1.0061e-10	LHFPL3	1.27974e-26	1.007	0.656	0.48	3.03119e-22	GPR82	5.04087e-35	0.751772	0.78	0.743	1.19398e-30	TEX40	1.63e-17	-1.07649	0.064	0.173	3.85e-13	KIF23	3.89458e-08	-1.28483	0.014	0.045	0.00092247
SHMT2	8.06117e-24	-0.601752	0.507	0.647	1.90937e-19	LSAMP	4.5888e-15	0.526311	0.9	0.901	1.0869e-10	FTH1	1.35347e-26	-0.559001	0.997	0.997	3.20582e-22	MT2A	5.29114e-35	-0.709556	0.136	0.259	1.25326e-30	POLR2J3	1.68e-17	-0.561339	0.758	0.826	3.98e-13	TCF19	4.08896e-08	-0.622575	0.048	0.098	0.000968511
ELAVL4	8.60464e-24	0.712693	0.392	0.264	2.03809e-19	INA	4.82032e-15	1.49978	0.248	0.116	1.14174e-10	GALNT18	1.40176e-26	-0.772714	0.055	0.185	3.32022e-22	APOL4	5.42857e-35	0.836422	0.818	0.791	1.28581e-30	NTN4	1.69e-17	0.981021	0.196	0.065	4.01e-13	SERPINA3	4.92719e-08	-2.43541	0.013	0.042	0.00116705
CHCHD2	9.02443e-24	-0.504338	0.971	0.975	2.13753e-19	EDIL3	5.02581e-15	-1.07392	0.096	0.227	1.19041e-10	DDR2	1.40391e-26	-0.78832	0.157	0.327	3.3253e-22	SKA3	5.8278e-35	-0.931541	0.057	0.151	1.38037e-30	SV2C	1.76e-17	-1.17906	0.016	0.085	4.18e-13	LFNG	5.82572e-08	-0.787028	0.052	0.103	0.00137988
RPH3A	1.0657e-23	0.869069	0.312	0.19	2.52423e-19	HIP1R	5.25796e-15	0.948966	0.559	0.411	1.2454e-10	BSN	1.45578e-26	0.594178	0.421	0.251	3.44816e-22	PGM2L1	5.9811e-35	0.808632	0.802	0.776	1.41668e-30	IER2	2.28e-17	-0.993191	0.468	0.606	5.39e-13	SLC43A2	6.00215e-08	0.617736	0.29	0.203	0.00142167
FAM171B	1.0736e-23	0.713653	0.466	0.337	2.54292e-19	CA10	5.95722e-15	1.55647	0.268	0.136	1.41103e-10	ABHD14A	1.58229e-26	1.13112	0.383	0.209	3.7478e-22	CRIP2	6.526e-35	0.791514	0.646	0.632	1.54575e-30	LHFP	2.35e-17	-1.07634	0.131	0.263	5.56e-13	C10orf10	6.33169e-08	-1.52188	0.08	0.14	0.00149972
FAM64A	1.09558e-23	-0.904058	0.112	0.216	2.595e-19	PREX2	6.11968e-15	-0.72763	0.125	0.268	1.44951e-10	BAIAP2	1.69806e-26	-0.580749	0.358	0.557	4.02202e-22	AURKB	8.01888e-35	-1.00504	0.047	0.135	1.89935e-30	MMP2	2.37e-17	0.53862	0.308	0.148	5.61e-13	RIPK2	6.50645e-08	-0.587363	0.281	0.373	0.00154112
B4GALNT4	1.13955e-23	0.521634	0.406	0.276	2.69914e-19	HBB	6.32044e-15	-2.94645	0.178	0.061	1.49706e-10	BEX4	1.85311e-26	0.597764	0.846	0.796	4.38928e-22	ERBB4	8.24276e-35	0.863797	0.343	0.222	1.95238e-30	DCXR	2.38e-17	-0.637436	0.682	0.782	5.64e-13	CAV1	6.71207e-08	-2.25223	0.018	0.051	0.00158982
LRRN1	1.29381e-23	0.682669	0.671	0.571	3.06453e-19	GLUD2	6.78728e-15	-1.08253	0.041	0.147	1.60764e-10	NKD1	1.86791e-26	0.796831	0.55	0.391	4.42432e-22	NTRK1	9.56079e-35	1.59222	0.21	0.112	2.26457e-30	ZFP36	2.89e-17	-1.22643	0.044	0.137	6.86e-13	RANBP17	7.54156e-08	0.522305	0.386	0.296	0.00178629
BHLHE41	1.5077e-23	-0.548512	0.071	0.161	3.57113e-19	GABRB1	7.17435e-15	-0.677418	0.015	0.102	1.69932e-10	VAMP5	2.76417e-26	-1.14615	0.062	0.195	6.54721e-22	AANAT	1.55572e-34	-0.606618	0.104	0.216	3.68487e-30	NMT1	3.01e-17	-0.69046	0.383	0.541	7.12e-13	SLC16A14	7.61065e-08	0.504244	0.263	0.173	0.00180266
RUNDC3A	1.65319e-23	0.814798	0.236	0.125	3.91573e-19	IFIH1	7.27478e-15	-0.731101	0.019	0.11	1.7231e-10	INSR	2.88637e-26	0.849008	0.576	0.414	6.83666e-22	CKAP2L	1.74575e-34	-0.603495	0.053	0.145	4.13499e-30	CPE	3.01e-17	-0.781771	0.628	0.72	7.13e-13	RGCC	8.15708e-08	-0.783169	0.339	0.427	0.00193209
PTPRN2	1.70521e-23	0.71284	0.555	0.446	4.03896e-19	ACOX2	7.35653e-15	-0.722304	0.045	0.158	1.74247e-10	GLIPR2	3.55416e-26	-0.523558	0.206	0.394	8.41839e-22	SAMD3	1.79333e-34	-0.510242	0.096	0.205	4.24769e-30	ACSBG1	3.28e-17	-1.20003	0.012	0.076	7.78e-13	HLA-E	8.71646e-08	-0.874916	0.268	0.353	0.00206458
BUB1	1.98791e-23	-0.579	0.084	0.18	4.70857e-19	TNFRSF12A	7.57583e-15	-0.549327	0.21	0.387	1.79441e-10	PDE4D	3.58545e-26	0.889407	0.589	0.431	8.49249e-22	ABTB1	2.06015e-34	0.848972	0.273	0.162	4.87967e-30	CYGB	3.64e-17	-0.662755	0.008	0.066	8.62e-13	FSTL1	9.27068e-08	-0.827219	0.033	0.074	0.00219585
PGRMC1	2.16403e-23	0.671168	0.642	0.583	5.12573e-19	ENDOD1	9.53081e-15	-0.538252	0.253	0.425	2.25747e-10	EPB49	3.9227e-26	-0.591697	0.075	0.216	9.29131e-22	KPNA2	2.19463e-34	-0.634177	0.284	0.436	5.19819e-30	KIAA0146	3.73e-17	0.629474	0.519	0.346	8.83e-13	CXCL2	1.06899e-07	-3.31136	0.006	0.027	0.002532
TMBIM1	2.37261e-23	-0.534178	0.262	0.393	5.61977e-19	FGF18	1.22224e-14	-0.760322	0.02	0.111	2.89499e-10	SPOCK3	4.15688e-26	0.860462	0.411	0.229	9.84599e-22	RASSF4	2.30966e-34	1.14792	0.311	0.196	5.47066e-30	KCNIP3	3.74e-17	0.712167	0.585	0.438	8.86e-13	SCN7A	1.07803e-07	-0.743657	0.021	0.055	0.00255343
NCAM2	2.75838e-23	0.723457	0.397	0.266	6.53349e-19	SPHK1	1.22872e-14	-0.77303	0.04	0.146	2.91035e-10	METRN	4.21703e-26	0.793803	0.494	0.318	9.98847e-22	KIAA0895L	2.50858e-34	0.707978	0.561	0.473	5.94182e-30	GBAS	5.27e-17	-0.615307	0.736	0.816	1.25e-12	KIFC1	1.09051e-07	-1.18491	0.025	0.062	0.00258299
KLHL7	2.7685e-23	0.617122	0.68	0.6	6.55747e-19	CNTN1	1.25971e-14	0.987454	0.7	0.701	2.98374e-10	RAB31	4.63062e-26	0.548278	0.903	0.864	1.09681e-21	SNCB	2.99809e-34	1.40503	0.121	0.046	7.10129e-30	SH3KBP1	5.57e-17	0.514756	0.462	0.277	1.32e-12	PTGR1	1.09366e-07	-0.548675	0.07	0.127	0.00259044
ELAVL2	2.80329e-23	1.09233	0.157	0.065	6.63987e-19	FLRT1	1.36974e-14	-1.60048	0.319	0.463	3.24438e-10	MVP	5.13691e-26	-0.914129	0.023	0.125	1.21673e-21	FCER2	2.99951e-34	-0.99948	0.022	0.094	7.10464e-30	ENO1	5.99e-17	-0.633938	0.693	0.786	1.42e-12	RNASE4	1.09449e-07	-0.872946	0.015	0.045	0.0025924
SMIM3	3.03773e-23	-0.519025	0.282	0.427	7.19517e-19	DBN1	1.38386e-14	0.561388	0.862	0.795	3.27782e-10	HIP1	5.65908e-26	1.06965	0.798	0.743	1.34041e-21	LRP1	3.10755e-34	0.676403	0.495	0.391	7.36054e-30	SLC25A18	6.58e-17	-0.7489	0.286	0.452	1.56e-12	BMPER	1.10752e-07	0.8956	0.168	0.094	0.00262326
ZEB1	3.0615e-23	0.648892	0.728	0.634	7.25148e-19	MPPED1	1.39127e-14	-0.529481	0.027	0.124	3.29535e-10	PCDH11X	6.59285e-26	0.687924	0.892	0.83	1.56158e-21	ENOX1	4.05271e-34	1.22643	0.25	0.143	9.59926e-30	SCAMP5	8.36e-17	0.576292	0.638	0.476	1.98e-12	PLEKHG5	1.31254e-07	0.53618	0.137	0.07	0.00310889
NSG1	3.31989e-23	1.08293	0.253	0.143	7.8635e-19	FAM195A	1.43042e-14	-0.580344	0.068	0.192	3.38809e-10	LRP1B	6.60244e-26	0.730545	0.581	0.42	1.56385e-21	SLC13A4	5.51975e-34	-2.62399	0.068	0.16	1.30741e-29	SLC6A11	1.02e-16	-1.34024	0.028	0.108	2.42e-12	KCNMB2	1.31757e-07	0.992395	0.168	0.094	0.00312079
RILPL2	3.42422e-23	-0.54425	0.051	0.131	8.1106e-19	ARPC1B	1.46403e-14	-0.76402	0.133	0.282	3.4677e-10	CHAD	6.69213e-26	1.3798	0.476	0.321	1.5851e-21	PGM5-AS1	5.53679e-34	-1.04663	0.098	0.208	1.31144e-29	CORO6	1.05e-16	-0.849515	0.135	0.267	2.48e-12	GADD45B	1.43069e-07	-0.835933	0.351	0.423	0.00338873
NLGN4X	3.85248e-23	0.539833	0.628	0.514	9.12498e-19	RNLS	1.51221e-14	-0.634845	0.031	0.131	3.58182e-10	SCRT2	6.98424e-26	0.527918	0.169	0.041	1.65429e-21	NNAT	5.78662e-34	0.879315	0.751	0.722	1.37062e-29	PCDHA3	1.1e-16	0.874244	0.309	0.156	2.6e-12	NEK2	1.52405e-07	-0.568613	0.688	0.642	0.00360987
PRMT8	4.97412e-23	-0.719544	0.028	0.094	1.17817e-18	HERC2P2	1.56338e-14	0.633666	0.88	0.877	3.70301e-10	GRIK4	7.21287e-26	0.852721	0.396	0.226	1.70844e-21	DYNC1H1	7.24677e-34	0.592794	0.814	0.823	1.71647e-29	CAND1	1.14e-16	0.717499	0.509	0.342	2.71e-12	SPA17	1.57735e-07	-0.801521	0.024	0.06	0.00373612
OSMR	5.0278e-23	-0.754628	0.7	0.779	1.19089e-18	SPSB1	2.0937e-14	-0.611257	0.084	0.209	4.95913e-10	SLIT2	7.66322e-26	1.17108	0.375	0.203	1.81511e-21	COL25A1	7.55271e-34	0.983145	0.162	0.074	1.78894e-29	NFKBIA	1.24e-16	-0.561328	0.664	0.767	2.93e-12	GPD1	1.60306e-07	0.700176	0.108	0.046	0.003797
GFRA1	5.24481e-23	0.687806	0.139	0.053	1.24229e-18	IRF5	2.1686e-14	-2.0495	0.01	0.09	5.13656e-10	ANGPT1	7.93701e-26	-0.859252	0.052	0.177	1.87996e-21	PCDH11X	7.55728e-34	1.15047	0.73	0.697	1.79002e-29	MT2A	1.48e-16	-0.817986	0.386	0.536	3.51e-12	NMRAL1	1.61901e-07	0.868063	0.099	0.041	0.0038348
SPOCD1	5.36672e-23	-1.11021	0.042	0.117	1.27116e-18	ELMO1	2.22429e-14	0.905782	0.714	0.657	5.26845e-10	GDAP1L1	7.9471e-26	0.699757	0.497	0.314	1.88235e-21	EPHA2	7.85468e-34	-0.552946	0.065	0.16	1.86046e-29	CD59	1.55e-16	-0.531392	0.47	0.631	3.68e-12	ZWINT	1.71449e-07	-1.02422	0.074	0.13	0.00406095
CDCA3	6.1581e-23	-1.24722	0.061	0.145	1.45861e-18	SCD	2.32817e-14	-0.535735	0.699	0.851	5.51451e-10	DCT	8.04629e-26	-1.59414	0.016	0.108	1.90584e-21	LRRC16A	9.58726e-34	0.993765	0.537	0.442	2.27084e-29	FOXN2	1.83e-16	0.541827	0.573	0.413	4.33e-12	CNIH4	2.22015e-07	-0.547481	0.474	0.568	0.00525864
KCNJ10	7.94973e-23	0.532387	0.412	0.279	1.88297e-18	ATP6V0E2	2.35158e-14	0.543173	0.867	0.859	5.56996e-10	PCMTD2	8.12867e-26	0.913083	0.738	0.665	1.92536e-21	PPIEL	9.67748e-34	0.56986	0.829	0.783	2.29221e-29	IL6ST	1.85e-16	0.54206	0.655	0.497	4.38e-12	MLF1IP	2.23208e-07	-1.20997	0.083	0.14	0.0052869
PID1	8.76642e-23	0.685091	0.49	0.371	2.07641e-18	LGALS1	2.56433e-14	-0.628864	0.328	0.517	6.07387e-10	TCF4	1.0837e-25	0.529817	0.955	0.908	2.56686e-21	RAD51AP1	1.11838e-33	-0.601816	0.126	0.239	2.64899e-29	KIF5C	1.87e-16	0.563692	0.593	0.422	4.44e-12	GFAP	2.24013e-07	-0.982385	0.809	0.748	0.00530598
ACAP3	9.22178e-23	0.506338	0.488	0.356	2.18427e-18	ELN	2.71761e-14	-3.02984	0.172	0.312	6.43694e-10	PLXND1	1.14422e-25	-0.561475	0.152	0.316	2.71021e-21	GOLGA6L7P	1.36933e-33	1.27833	0.154	0.069	3.24339e-29	SMARCD1	2.29e-16	0.648561	0.53	0.364	5.43e-12	S100A3	2.40816e-07	-1.03477	0.002	0.017	0.00570397
IGSF21	9.388e-23	0.824827	0.144	0.057	2.22364e-18	SLC44A3	2.80611e-14	-0.696138	0.027	0.121	6.64655e-10	ALCAM	1.17872e-25	0.667636	0.825	0.663	2.79191e-21	FMNL3	1.37234e-33	0.604771	0.569	0.467	3.25051e-29	IGSF9B	2.59e-16	0.582371	0.418	0.256	6.14e-12	PLXDC2	2.45796e-07	-0.861362	0.017	0.047	0.00582194
EIF4G3	9.83431e-23	0.553079	0.762	0.67	2.32936e-18	MMP19	2.82559e-14	-1.4992	0.063	0.177	6.6927e-10	GAS7	1.40001e-25	-0.845824	0.326	0.472	3.31606e-21	ATOH1	1.42305e-33	1.31948	0.082	0.022	3.37065e-29	TSHR	2.76e-16	-1.05604	0.097	0.214	6.54e-12	ZNF519	2.54036e-07	0.500324	0.472	0.39	0.0060171
LNX1	9.86671e-23	1.61983	0.312	0.204	2.33703e-18	COL6A2	3.04054e-14	-1.2053	0.107	0.242	7.20183e-10	KCNS3	1.47688e-25	-0.900331	0.047	0.168	3.49813e-21	CDCA8	1.5728e-33	-0.898955	0.061	0.154	3.72533e-29	GSTK1	3.01e-16	-0.879605	0.384	0.514	7.14e-12	GLUL	2.62441e-07	-1.25617	0.87	0.875	0.00621618
FRMD4A	9.9229e-23	0.610029	0.339	0.223	2.35034e-18	BOC	3.63687e-14	-1.45665	0.237	0.378	8.61428e-10	ARNT2	2.07708e-25	0.87238	0.703	0.6	4.91976e-21	QRFPR	1.64123e-33	1.7583	0.352	0.255	3.88741e-29	SLC44A1	3.44e-16	0.746395	0.56	0.408	8.16e-12	KLHDC8A	2.73232e-07	1.03034	0.256	0.178	0.00647177
SCN2A	1.02876e-22	0.625735	0.284	0.168	2.43672e-18	TNRC6B	3.83563e-14	0.555194	0.935	0.908	9.08506e-10	SPRY4	2.38584e-25	1.79789	0.39	0.233	5.6511e-21	KIF15	1.69657e-33	-0.573411	0.067	0.163	4.0185e-29	TNFRSF19	3.54e-16	-0.988414	0.026	0.103	8.39e-12	TNFRSF25	2.83924e-07	1.00097	0.103	0.045	0.00672503
NALCN	1.04735e-22	0.518412	0.237	0.127	2.48076e-18	ANXA4	3.85066e-14	-0.751598	0.054	0.164	9.12067e-10	PPM1K	2.45947e-25	0.587022	0.94	0.924	5.82549e-21	KIF21A	1.80464e-33	1.04542	0.437	0.323	4.27447e-29	HS3ST2	3.82e-16	-0.842452	0.064	0.169	9.04e-12	TAAR3	2.91847e-07	-0.612294	0.005	0.023	0.00691268
ANGPTL4	1.07936e-22	-2.54241	0.048	0.123	2.55657e-18	GYLTL1B	3.94284e-14	-1.19228	0.006	0.079	9.33901e-10	THY1	2.4815e-25	0.691004	0.797	0.716	5.87768e-21	DCUN1D2	2.27046e-33	0.656058	0.825	0.78	5.37782e-29	TUBB4A	3.93e-16	0.538278	0.636	0.475	9.3e-12	RFX2	2.9614e-07	-0.655532	0.032	0.071	0.00701438
CPED1	1.09944e-22	-0.820223	0.038	0.109	2.60413e-18	ZFP36	3.99432e-14	-0.731059	0.308	0.486	9.46094e-10	CRMP1	2.52434e-25	0.622228	0.75	0.587	5.97916e-21	ESRRB	2.33577e-33	0.765631	0.095	0.03	5.5325e-29	BCAR3	4.07e-16	-1.49219	0.03	0.108	9.63e-12	PTHLH	3.02089e-07	-0.658587	0.022	0.056	0.00715528
IGFBP5	1.26223e-22	-0.971011	0.49	0.618	2.98972e-18	CDS1	4.11685e-14	-0.612089	0.008	0.084	9.75117e-10	SPOCK2	2.66666e-25	0.880532	0.306	0.14	6.31625e-21	PRC1	2.42691e-33	-0.502953	0.163	0.288	5.74839e-29	ALDH7A1	4.69e-16	-0.717751	0.451	0.603	1.11e-11	GINS2	3.27207e-07	-0.847712	0.083	0.14	0.00775023
DLGAP5	1.39607e-22	-1.09032	0.046	0.121	3.30673e-18	LRRC6	4.22817e-14	-0.522072	0.031	0.129	1.00148e-09	SHROOM2	3.46124e-25	0.879666	0.262	0.109	8.1983e-21	PTPRK	2.85643e-33	1.12579	0.402	0.297	6.76574e-29	KCNT2	4.72e-16	0.557115	0.246	0.104	1.12e-11	GPC2	3.28479e-07	0.62667	0.412	0.331	0.00778035
LOC154761	1.45299e-22	-0.856921	0.153	0.262	3.44156e-18	DERL3	4.56796e-14	-0.5597	0.035	0.136	1.08197e-09	PCDH9	3.55404e-25	0.956554	0.684	0.567	8.4181e-21	PTPRD	3.09646e-33	0.725565	0.697	0.636	7.33428e-29	ADD3	4.91e-16	0.661181	0.653	0.508	1.16e-11	ABCA11P	3.39889e-07	0.65331	0.467	0.392	0.00805061
MEX3A	1.55745e-22	0.674624	0.487	0.37	3.68899e-18	PID1	4.64983e-14	0.939757	0.453	0.314	1.10136e-09	CNTNAP5	3.64093e-25	1.34154	0.335	0.174	8.62392e-21	ATP6V1G2	3.10561e-33	0.94601	0.352	0.243	7.35594e-29	BMPR1B	5.88e-16	-0.999859	0.031	0.112	1.39e-11	PURG	3.41784e-07	0.59907	0.195	0.117	0.0080955
FYN	1.56657e-22	0.743613	0.7	0.616	3.71058e-18	SHISA3	4.70304e-14	-1.43431	0.006	0.079	1.11396e-09	LEFTY2	5.12842e-25	-4.37818	0.008	0.09	1.21472e-20	DSN1	3.19949e-33	-0.557018	0.164	0.282	7.57831e-29	ATXN7L3B	5.91e-16	0.509615	0.689	0.546	1.4e-11	TNFRSF19	3.45064e-07	-0.888089	0.026	0.062	0.0081732
MBP	1.65718e-22	1.03183	0.212	0.107	3.92521e-18	TSTD1	5.06503e-14	-0.778604	0.03	0.128	1.1997e-09	HMSD	5.55254e-25	-0.939853	0.029	0.133	1.31518e-20	PDE4DIP	3.30099e-33	1.0081	0.38	0.266	7.81872e-29	LCAT	8.23e-16	-0.92076	0.202	0.342	1.95e-11	NADKD1	3.79716e-07	-0.510157	0.51	0.586	0.00899395
MEGF11	1.7925e-22	0.924631	0.327	0.211	4.24572e-18	LEMD1	5.1231e-14	1.01228	0.219	0.095	1.21346e-09	SERPINI1	5.89646e-25	-2.49409	0.097	0.234	1.39663e-20	HMGCLL1	3.55878e-33	1.87611	0.067	0.014	8.42933e-29	SLC35F2	8.88e-16	-0.836712	0.146	0.276	2.1e-11	IGFBP7	4.14719e-07	-0.686741	0.033	0.073	0.00982303
UBE2E2	1.90759e-22	0.74666	0.37	0.248	4.51832e-18	ARHGEF2	5.13747e-14	0.654286	0.684	0.583	1.21686e-09	CPXM1	5.93587e-25	0.581651	0.718	0.549	1.40597e-20	PRKACB	3.70631e-33	0.89656	0.551	0.464	8.77876e-29	FAM46A	9.31e-16	-0.864358	0.047	0.139	2.21e-11	SH3GL3	4.15254e-07	0.645333	0.089	0.034	0.0098357
CCDC50	2.20283e-22	0.793698	0.788	0.74	5.21763e-18	NT5E	5.52958e-14	-0.698464	0.251	0.413	1.30974e-09	LINC00649	6.03297e-25	0.552376	0.85	0.833	1.42897e-20	RCBTB2	4.46285e-33	1.05766	0.381	0.269	1.05707e-28	ARHGAP35	9.58e-16	0.534542	0.429	0.275	2.27e-11	FLJ42709	1.01283e-14	0.529472	0.483	0.331	2.399e-10
COL9A1	2.66817e-22	1.31535	0.164	0.072	6.31983e-18	ANK3	5.62737e-14	0.809921	0.502	0.358	1.3329e-09	PFKFB2	6.14944e-25	-0.502584	0.269	0.462	1.45656e-20	PARPBP	5.89837e-33	-0.593335	0.084	0.185	1.39709e-28	RARA	9.87e-16	0.835949	0.193	0.069	2.34e-11
DYNC1I1	2.74639e-22	1.38048	0.211	0.11	6.50511e-18	GPR82	5.79776e-14	0.600879	0.918	0.89	1.37326e-09	SLC24A3	6.34988e-25	1.4498	0.172	0.045	1.50403e-20	MYO7B	6.30962e-33	0.582259	0.078	0.02	1.4945e-28	AEN	9.92e-16	-0.801452	0.217	0.368	2.35e-11
ANLN	2.76451e-22	-0.532104	0.174	0.29	6.54803e-18	DIO2	5.92552e-14	-0.592253	0.118	0.252	1.40352e-09	MTSS1L	6.90071e-25	0.754959	0.589	0.461	1.6345e-20	MYH7	8.19614e-33	0.799715	0.093	0.029	1.94134e-28	F3	1.06e-15	-1.62632	0.371	0.515	2.51e-11
TRAK1	3.20796e-22	0.864773	0.491	0.384	7.59837e-18	ACVR1	6.9888e-14	-0.738463	0.091	0.217	1.65537e-09	DSEL	7.37527e-25	0.764373	0.857	0.789	1.74691e-20	PPM1H	8.70168e-33	1.25582	0.22	0.123	2.06108e-28	SMARCAD1	1.13e-15	0.513775	0.415	0.258	2.67e-11
SOGA3	3.52492e-22	0.636688	0.367	0.25	8.34913e-18	TMEM140	7.11741e-14	-0.565294	0.172	0.331	1.68583e-09	KCNQ2	8.95747e-25	0.804185	0.451	0.27	2.12167e-20	LAMA2	9.41317e-33	-0.805123	0.088	0.186	2.2296e-28	SYPL1	1.15e-15	-0.813824	0.279	0.43	2.72e-11
STMN1	4.03546e-22	0.514723	0.919	0.882	9.55838e-18	GJA5	7.32936e-14	-1.8582	0.001	0.066	1.73603e-09	CRYAB	9.44439e-25	-2.0972	0.182	0.343	2.237e-20	WSB1	1.14783e-32	0.559545	0.905	0.907	2.71875e-28	EFHD1	1.18e-15	-0.943539	0.042	0.128	2.79e-11
RUSC2	5.41933e-22	0.608428	0.469	0.345	1.28362e-17	SQRDL	7.6303e-14	-1.12876	0.02	0.107	1.80731e-09	COL24A1	1.11155e-24	-0.997855	0.015	0.104	2.63281e-20	KIF3A	1.34552e-32	0.685378	0.852	0.8	3.18701e-28	ERAP2	1.18e-15	-1.10383	0.355	0.511	2.8e-11
EFHD1	5.72239e-22	-0.537335	0.028	0.091	1.35541e-17	NAT14	8.01829e-14	-0.576414	0.101	0.235	1.89921e-09	REEP4	1.20042e-24	-0.537818	0.066	0.198	2.84331e-20	JAKMIP2	1.53381e-32	0.825523	0.55	0.462	3.63299e-28	MAP3K5	1.28e-15	-0.528496	0.092	0.209	3.03e-11
TMSB15A	6.74091e-22	0.627601	0.344	0.22	1.59665e-17	RIPK4	8.03913e-14	-0.763357	0.006	0.078	1.90415e-09	SLC22A3	1.48713e-24	0.989757	0.324	0.158	3.52241e-20	KLHL4	1.64565e-32	0.955926	0.122	0.047	3.8979e-28	GPD1	1.29e-15	0.98482	0.192	0.07	3.05e-11
RECQL	6.77103e-22	-0.510999	0.309	0.439	1.60379e-17	SNAR-B1	8.1214e-14	1.07136	0.226	0.1	1.92363e-09	GJA1	1.63065e-24	-0.672041	0.135	0.289	3.86235e-20	RUSC2	2.26813e-32	0.898945	0.43	0.329	5.37229e-28	DDX11-AS1	1.48e-15	0.75854	0.225	0.094	3.49e-11
FAS	6.77212e-22	-0.666957	0.067	0.152	1.60404e-17	SNAR-B2	8.1214e-14	1.07136	0.226	0.1	1.92363e-09	CDH8	1.88876e-24	1.05731	0.195	0.061	4.47371e-20	SPATA13	2.33034e-32	0.95619	0.546	0.46	5.51965e-28	STXBP5L	1.56e-15	0.808273	0.372	0.22	3.7e-11
THRA	7.86228e-22	0.531182	0.478	0.357	1.86226e-17	SCML1	8.23105e-14	-0.837317	0.082	0.205	1.94961e-09	DAAM2	2.07371e-24	-0.90323	0.12	0.274	4.9118e-20	PKD1	4.71745e-32	0.525441	0.813	0.786	1.11738e-27	STARD13	1.57e-15	-0.585151	0.07	0.173	3.71e-11
PRKCZ	7.99948e-22	0.79392	0.214	0.11	1.89476e-17	ZNF286A	8.71922e-14	0.793648	0.917	0.884	2.06523e-09	NUDT14	2.27012e-24	-1.03773	0.053	0.174	5.37701e-20	ARGLU1	5.272e-32	0.584986	0.857	0.858	1.24873e-27	POLR2J2	1.57e-15	-0.618438	0.278	0.43	3.72e-11
TACC3	8.00461e-22	-0.615487	0.105	0.203	1.89597e-17	APBB2	1.05626e-13	0.969642	0.791	0.726	2.50187e-09	ABCB9	2.69368e-24	-0.694256	0.037	0.147	6.38025e-20	MAGED2	5.62781e-32	0.521355	0.812	0.827	1.333e-27	RNU4ATAC	1.59e-15	-1.37553	0.017	0.083	3.76e-11
NUF2	1.03861e-21	-0.857799	0.109	0.207	2.46006e-17	NPTX2	1.05832e-13	-1.44312	0.099	0.226	2.50674e-09	CRABP1	2.70397e-24	0.823075	0.284	0.127	6.40463e-20	KIF4A	5.82548e-32	-0.51673	0.05	0.136	1.37982e-27	GAS6	1.68e-15	-0.723446	0.03	0.108	3.98e-11
ERC2	1.09697e-21	0.687895	0.261	0.15	2.59828e-17	FIBCD1	1.10722e-13	-2.27934	0.013	0.091	2.62257e-09	FDPS	3.48279e-24	-0.685034	0.756	0.837	8.24933e-20	KLC1	1.03759e-31	1.00616	0.646	0.59	2.45764e-27	DDIT4	2.43e-15	-0.87021	0.591	0.7	5.75e-11
AGPAT2	1.39803e-21	-0.669895	0.046	0.12	3.31136e-17	VGF	1.14534e-13	-0.720918	0.082	0.203	2.71286e-09	TGFA	4.087e-24	1.57511	0.3	0.146	9.68046e-20	MAGEA3	1.11584e-31	-0.821953	0.075	0.168	2.64298e-27	ANKRD29	2.67e-15	-1.05415	0.04	0.125	6.31e-11
B3GAT1	1.59773e-21	0.569244	0.469	0.357	3.78439e-17	DOK1	1.19603e-13	-0.729356	0.106	0.239	2.83291e-09	PDE4A	4.36427e-24	0.598099	0.374	0.21	1.03372e-19	NCAN	1.43128e-31	1.09704	0.181	0.092	3.39013e-27	HPCAL4	2.74e-15	-0.845017	0.023	0.094	6.5e-11
CYTH1	1.65348e-21	0.816406	0.38	0.259	3.91643e-17	APBA2	1.25391e-13	0.660115	0.698	0.575	2.97001e-09	IP6K2	4.80724e-24	0.749589	0.781	0.742	1.13864e-19	CCDC144B	1.48299e-31	0.654121	0.961	0.94	3.51262e-27	FAM84A	3.36e-15	0.709853	0.423	0.276	7.95e-11
TREM1	1.67095e-21	-2.57457	0.006	0.048	3.95781e-17	ACSF2	1.39327e-13	-0.61186	0.063	0.177	3.30011e-09	TRAF4	5.84714e-24	1.1558	0.598	0.483	1.38495e-19	APBA1	1.73589e-31	1.32604	0.135	0.058	4.11164e-27	ILK	3.49e-15	-0.651858	0.303	0.457	8.26e-11
KIF1A	1.68866e-21	0.531401	0.55	0.443	3.99976e-17	NTM	1.5161e-13	0.987373	0.421	0.269	3.59103e-09	DPYSL3	6.11665e-24	0.838363	0.794	0.725	1.44879e-19	CYP39A1	1.7806e-31	-0.654755	0.085	0.184	4.21752e-27	REEP6	3.8e-15	-0.813437	0.099	0.215	9e-11
DPP4	1.8841e-21	-0.682343	0.082	0.171	4.46268e-17	RASA3	1.69156e-13	-1.06398	0.316	0.476	4.00663e-09	2021-09-07	7.36333e-24	-0.562969	0.851	0.93	1.74408e-19	MMP16	1.83274e-31	0.678719	0.145	0.065	4.34102e-27	LAPTM4A	3.85e-15	-0.505907	0.553	0.692	9.12e-11
NBEA	1.9189e-21	0.701525	0.52	0.396	4.5451e-17	GRIA4	1.79861e-13	0.787261	0.698	0.6	4.2602e-09	PLK1S1	9.19439e-24	0.809107	0.609	0.451	2.17778e-19	SNAP91	2.02356e-31	0.899686	0.27	0.164	4.79301e-27	MAFB	3.95e-15	-0.96075	0.159	0.29	9.36e-11
WASF1	1.97197e-21	0.823191	0.458	0.341	4.6708e-17	AHDC1	1.86631e-13	-0.591083	0.232	0.376	4.42054e-09	PDLIM5	9.48503e-24	0.794026	0.947	0.944	2.24662e-19	FKBP5	3.07916e-31	-0.502226	0.62	0.7	7.29329e-27	NRN1	3.96e-15	-0.82512	0.096	0.21	9.37e-11
VOPP1	2.14751e-21	-0.560556	0.415	0.55	5.0866e-17	TNFRSF11B	1.89073e-13	-0.922174	0.035	0.131	4.47838e-09	EGR2	1.02452e-23	0.77985	0.57	0.398	2.42667e-19	DLX5	3.32739e-31	1.77557	0.086	0.026	7.88126e-27	MON2	4.05e-15	0.543294	0.628	0.519	9.6e-11
PIGA	2.2231e-21	-0.69928	0.114	0.213	5.26563e-17	RNASET2	1.90611e-13	-1.02419	0.098	0.223	4.51482e-09	LRRC16A	1.12289e-23	-0.552292	0.113	0.264	2.65969e-19	ERC2	3.48184e-31	0.939992	0.327	0.222	8.24708e-27	USP2	4.21e-15	-0.666441	0.311	0.464	9.96e-11
NTRK3	2.89658e-21	0.758392	0.463	0.338	6.86084e-17	PLK1S1	2.07872e-13	1.08424	0.563	0.462	4.92365e-09	SETD5	1.15051e-23	0.856602	0.769	0.721	2.72509e-19	NHLH2	4.71011e-31	2.27609	0.143	0.066	1.11564e-26	RAP2A	4.64e-15	0.510834	0.614	0.476	1.1e-10
EIF2S3	3.05292e-21	-0.577583	0.907	0.949	7.23115e-17	IGFBP5	2.15605e-13	-0.688127	0.443	0.617	5.10682e-09	DMD	1.18185e-23	0.5252	0.393	0.215	2.79932e-19	ZNF286B	9.26299e-31	0.940507	0.685	0.642	2.19403e-26	PCDHB10	5.04e-15	0.635454	0.355	0.198	1.19e-10
PCBP4	3.67428e-21	0.595475	0.644	0.543	8.70289e-17	LHFPL3-AS1	2.2013e-13	1.1008	0.316	0.179	5.21399e-09	DRP2	1.22138e-23	0.80288	0.265	0.115	2.89296e-19	NDFIP1	1.0324e-30	0.555318	0.814	0.844	2.44534e-26	NGFR	5.53e-15	-0.764325	0.005	0.052	1.31e-10
SORCS1	3.68637e-21	0.88359	0.103	0.032	8.73153e-17	OTX2	2.42784e-13	1.21746	0.221	0.099	5.75059e-09	PLLP	1.23736e-23	2.0392	0.293	0.148	2.93081e-19	C18orf42	1.75602e-30	1.71663	0.092	0.03	4.1593e-26	PAK7	6.17e-15	0.715248	0.263	0.125	1.46e-10
TFE3	3.94814e-21	-0.642119	0.248	0.365	9.35158e-17	SRGN	2.70298e-13	-1.20692	0.016	0.096	6.40227e-09	TNC	1.41789e-23	-0.792087	0.379	0.543	3.35841e-19	CELF3	1.81469e-30	0.515708	0.534	0.437	4.29828e-26	PALLD	6.19e-15	0.531121	0.55	0.397	1.47e-10
APOBEC3B	4.37296e-21	-1.18802	0.02	0.075	1.03578e-16	LUM	2.70464e-13	-2.65058	0.002	0.066	6.40621e-09	USP24	1.62897e-23	1.14938	0.543	0.401	3.85839e-19	PNPLA3	2.15587e-30	-0.642331	0.289	0.407	5.10639e-26	ST3GAL4	6.77e-15	-1.13758	0.065	0.163	1.6e-10
KIF23	4.5087e-21	-0.614806	0.072	0.157	1.06793e-16	SYTL5	2.8324e-13	-0.844286	0.009	0.083	6.70881e-09	TIMP1	1.79245e-23	-1.16364	0.441	0.63	4.24561e-19	PLSCR1	2.44273e-30	-0.657717	0.049	0.13	5.78584e-26	CCDC103	7.12e-15	-1.24643	0.022	0.09	1.69e-10
RCN2	4.612e-21	0.542673	0.761	0.717	1.0924e-16	VRK2	2.88977e-13	-0.899595	0.057	0.166	6.8447e-09	CNIH3	1.9228e-23	-2.06868	0.047	0.159	4.55433e-19	TRAPPC2	2.49996e-30	0.602959	0.952	0.937	5.9214e-26	HLA-F	7.67e-15	-0.512277	0.132	0.265	1.82e-10
DNAJB5	4.71445e-21	0.619088	0.387	0.27	1.11667e-16	ITPKB	3.0028e-13	-0.64466	0.084	0.205	7.11243e-09	JMJD1C	2.04313e-23	0.614517	0.834	0.761	4.83935e-19	CACNA1E	2.5238e-30	0.632868	0.218	0.123	5.97787e-26	PER2	8e-15	-0.628607	0.921	0.944	1.9e-10
NKAIN1	4.85531e-21	0.569704	0.125	0.046	1.15003e-16	TPD52	3.15706e-13	-0.516519	0.107	0.241	7.47781e-09	EEPD1	2.53812e-23	-0.680059	0.119	0.271	6.0118e-19	MGAT4C	2.89029e-30	1.57843	0.085	0.026	6.84595e-26	PAPLN	8.51e-15	-0.502564	0.726	0.804	2.02e-10
MAP3K1	4.88375e-21	0.829767	0.526	0.416	1.15676e-16	GNAO1	3.19494e-13	0.730466	0.548	0.403	7.56754e-09	GAP43	2.63382e-23	0.576364	0.485	0.317	6.23845e-19	STON2	3.65519e-30	0.962571	0.558	0.483	8.65768e-26	USE1	8.71e-15	-0.699931	0.388	0.525	2.06e-10
BCL11B	4.92657e-21	0.504621	0.144	0.06	1.16691e-16	ELL2	3.8674e-13	-0.538655	0.091	0.214	9.16031e-09	EIF1B	2.80159e-23	0.783271	0.818	0.765	6.63585e-19	VAMP2	4.80954e-30	0.580821	0.713	0.698	1.13919e-25	LFNG	9.01e-15	-1.20524	0.036	0.115	2.13e-10
HRASLS	5.58756e-21	1.09407	0.265	0.16	1.32347e-16	CPE	3.94331e-13	-0.574028	0.307	0.465	9.34012e-09	ACAP3	3.22289e-23	0.697819	0.46	0.297	7.63373e-19	TMEM144	5.39274e-30	0.889205	0.099	0.034	1.27732e-25	SLIT2	9.12e-15	1.19668	0.156	0.047	2.16e-10
VCAM1	6.05111e-21	-1.42994	0.023	0.081	1.43327e-16	ACTL6B	4.39613e-13	1.04239	0.147	0.048	1.04127e-08	FAM155A	3.3067e-23	0.91263	0.331	0.169	7.83226e-19	RNF152	6.16419e-30	1.17582	0.109	0.041	1.46005e-25	HECW1	9.43e-15	0.807228	0.363	0.22	2.23e-10
CENPK	6.16077e-21	-0.522768	0.175	0.287	1.45924e-16	KCNK6	4.50304e-13	-1.00187	0.028	0.117	1.06659e-08	ATF7IP	4.38765e-23	0.802477	0.793	0.735	1.03926e-18	ESYT2	6.5217e-30	0.628922	0.865	0.819	1.54473e-25	DGCR5	9.73e-15	-0.688545	0.104	0.219	2.3e-10
CDCA8	6.32693e-21	-0.726981	0.075	0.16	1.4986e-16	ARNTL	4.78898e-13	-0.563	0.087	0.208	1.13432e-08	PCDH19	5.13426e-23	0.603998	0.233	0.093	1.2161e-18	TSPAN18	7.59388e-30	1.1938	0.228	0.136	1.79869e-25	2021-09-04	1.02e-14	-0.911689	0.177	0.309	2.42e-10
TNS3	7.08848e-21	1.09395	0.283	0.178	1.67898e-16	SLFN5	4.90229e-13	-1.11698	0.031	0.122	1.16116e-08	RAMP2	5.30661e-23	0.698192	0.398	0.23	1.25692e-18	GPR12	8.92737e-30	1.26075	0.514	0.433	2.11454e-25	REEP1	1.06e-14	0.729658	0.45	0.312	2.52e-10
SKIL	7.7114e-21	0.537096	0.719	0.64	1.82652e-16	OAF	4.93706e-13	-0.586547	0.054	0.159	1.16939e-08	TUBA4A	6.58748e-23	-0.770862	0.061	0.182	1.56031e-18	EXOC3L1	1.06283e-29	1.06146	0.143	0.066	2.51743e-25	ANKFN1	1.1e-14	-0.520519	0.163	0.3	2.6e-10
KIAA1755	8.59049e-21	0.65079	0.264	0.159	2.03474e-16	PCMTD2	4.96223e-13	0.662266	0.788	0.743	1.17535e-08	ABCC5	7.283e-23	0.934414	0.654	0.554	1.72505e-18	KLHL13	1.08127e-29	0.609421	0.166	0.08	2.5611e-25	DARS	1.14e-14	-0.644244	0.587	0.709	2.7e-10
GATS	9.22753e-21	0.630614	0.519	0.4	2.18563e-16	PLA2G5	5.20199e-13	-0.939854	0.006	0.073	1.23214e-08	GTF2IP1	7.38457e-23	0.806095	0.794	0.754	1.74911e-18	MPP4	1.64191e-29	-1.34759	0.039	0.113	3.88902e-25	FDXR	1.15e-14	-1.26934	0.077	0.178	2.72e-10
ZNF704	9.37324e-21	0.541147	0.736	0.653	2.22015e-16	MAPT	5.32832e-13	0.703885	0.612	0.487	1.26207e-08	ZBTB16	7.56164e-23	1.24397	0.216	0.079	1.79105e-18	DPF3	1.73639e-29	1.18075	0.15	0.071	4.11282e-25	PRPS1	1.15e-14	-0.718598	0.179	0.313	2.73e-10
WARS	9.44507e-21	-0.648866	0.501	0.614	2.23716e-16	NDRG1	5.51911e-13	-1.75615	0.091	0.213	1.30726e-08	PLCD3	7.78931e-23	-1.00114	0.159	0.305	1.84498e-18	TMEM246	1.97312e-29	1.15788	0.281	0.182	4.67353e-25	PPP1CC	1.24e-14	0.690126	0.497	0.349	2.94e-10
FLRT1	9.73248e-21	0.617379	0.235	0.13	2.30524e-16	FOSB	5.89611e-13	-0.646626	0.563	0.704	1.39655e-08	CELF5	8.18611e-23	0.520344	0.305	0.154	1.93896e-18	SLC1A2	2.11288e-29	0.801727	0.456	0.36	5.00457e-25	EIF1AY	1.29e-14	0.706637	0.244	0.111	3.07e-10
BIRC5	9.85483e-21	-0.667343	0.145	0.247	2.33421e-16	SPA17	5.99215e-13	-0.749568	0.091	0.211	1.4193e-08	CDKN1A	9.29551e-23	-0.630805	0.124	0.275	2.20173e-18	ZNF493	2.39861e-29	0.860816	0.657	0.583	5.68136e-25	LAMB2	1.59e-14	-0.693756	0.027	0.098	3.77e-10
DYRK4	1.03063e-20	-0.662445	0.296	0.417	2.44115e-16	TNFRSF1B	6.29243e-13	-1.21981	0.353	0.486	1.49043e-08	DNAJA4	9.44676e-23	0.897143	0.276	0.127	2.23756e-18	ROBO1	2.52972e-29	1.25618	0.47	0.381	5.9919e-25	JUND	1.84e-14	-0.569885	0.553	0.658	4.37e-10
FABP5	1.05468e-20	-0.612494	0.566	0.664	2.4981e-16	BHLHE40	6.80263e-13	-1.3435	0.057	0.164	1.61127e-08	SHD	1.28473e-22	0.771484	0.208	0.073	3.04302e-18	GFRA1	2.71845e-29	0.924635	0.261	0.162	6.43891e-25	GPR37L1	1.86e-14	0.557671	0.862	0.835	4.4e-10
NCAPD2	1.06912e-20	-1.07147	0.288	0.403	2.53232e-16	FBN3	7.62529e-13	0.905186	0.517	0.388	1.80613e-08	MERTK	1.34431e-22	-0.727419	0.069	0.192	3.18414e-18	BEX1	3.01218e-29	0.511152	0.816	0.843	7.13465e-25	SIK1	2.28e-14	-0.56052	0.054	0.144	5.39e-10
ARC	1.11381e-20	0.673269	0.557	0.462	2.63817e-16	CELF2	7.75212e-13	0.753984	0.853	0.803	1.83617e-08	PTTG1	1.6114e-22	-0.92542	0.158	0.316	3.81675e-18	RAD51	4.07391e-29	-0.814394	0.091	0.183	9.64946e-25	ARMCX5	2.39e-14	0.872737	0.314	0.17	5.66e-10
SLC35F1	1.19806e-20	0.789108	0.785	0.746	2.83772e-16	CXXC5	8.24929e-13	-0.797959	0.395	0.537	1.95393e-08	KCNIP3	2.13138e-22	1.27031	0.219	0.084	5.04838e-18	GPRASP1	4.31337e-29	1.0498	0.223	0.13	1.02167e-24	PPIF	2.41e-14	-0.727101	0.334	0.477	5.72e-10
GPR153	1.2865e-20	0.718896	0.158	0.071	3.04721e-16	NUPR1	8.47852e-13	-1.88128	0.017	0.096	2.00822e-08	TRIM67	2.26663e-22	0.897449	0.375	0.214	5.36873e-18	EGLN3	4.58856e-29	-0.60091	0.031	0.101	1.08685e-24	MBD5	2.43e-14	0.564822	0.461	0.308	5.76e-10
TRIO	1.34182e-20	0.524678	0.861	0.816	3.17823e-16	BHLHE41	8.68304e-13	-0.805472	0.008	0.078	2.05666e-08	C11orf75	2.44346e-22	-0.627704	0.055	0.171	5.78759e-18	PPFIA4	4.68548e-29	1.07325	0.237	0.142	1.1098e-24	MRPL41	2.59e-14	-0.810975	0.224	0.356	6.13e-10
TUBA1B	1.58647e-20	-0.642846	0.958	0.958	3.75772e-16	TAGLN3	8.80692e-13	0.791233	0.583	0.463	2.08601e-08	HIF3A	2.58947e-22	0.538286	0.745	0.678	6.13342e-18	SELM	4.93201e-29	1.44571	0.167	0.085	1.1682e-24	SH3BGRL2	2.6e-14	0.686988	0.337	0.195	6.15e-10
MICA	1.77044e-20	-0.525237	0.119	0.214	4.19347e-16	DSEL	9.5505e-13	0.851032	0.914	0.901	2.26213e-08	MASP1	3.45872e-22	0.797536	0.253	0.108	8.19231e-18	SSX4	5.6423e-29	-1.69775	0.003	0.049	1.33643e-24	C3orf70	2.74e-14	0.618641	0.756	0.728	6.5e-10
ESPL1	1.90376e-20	-0.51551	0.081	0.167	4.50925e-16	SLITRK2	1.03732e-12	0.918667	0.737	0.655	2.45699e-08	PFKFB3	3.71489e-22	-0.730809	0.254	0.42	8.79909e-18	NDC80	5.79916e-29	-0.596771	0.056	0.139	1.37359e-24	RAPGEF2	2.97e-14	0.508635	0.462	0.316	7.03e-10
RNF150	1.92549e-20	0.626557	0.187	0.092	4.5607e-16	H19	1.22542e-12	1.1357	0.195	0.369	2.90253e-08	CADM3	4.06787e-22	0.678441	0.511	0.366	9.63515e-18	KIAA1549L	6.74645e-29	0.523014	0.259	0.156	1.59796e-24	IZUMO4	3.52e-14	-0.805274	0.028	0.101	8.35e-10
TMEM116	2.16255e-20	-0.511714	0.154	0.26	5.12222e-16	GSTT2	1.26195e-12	-0.797519	0.107	0.232	2.98906e-08	GNRHR2	4.07659e-22	0.516591	0.931	0.924	9.65582e-18	OIP5	7.15738e-29	-0.517668	0.073	0.161	1.6953e-24	GPR123	3.74e-14	0.864718	0.461	0.322	8.87e-10
TANC2	2.58518e-20	0.526196	0.729	0.654	6.12326e-16	LGALS3	1.33798e-12	-0.634191	0.232	0.391	3.16913e-08	FGF14	4.22117e-22	0.913817	0.472	0.311	9.99826e-18	MLL	8.53697e-29	0.560866	0.736	0.706	2.02207e-24	HIST1H3D	3.91e-14	-1.21531	0.041	0.122	9.27e-10
KIAA1211	2.62014e-20	1.12462	0.332	0.223	6.20607e-16	BRD3	1.34365e-12	0.564565	0.886	0.879	3.18256e-08	HLA-E	4.22193e-22	-0.845338	0.361	0.523	1.00001e-17	RUNX1T1	1.18533e-28	0.656266	0.576	0.474	2.80758e-24	CSF1	3.98e-14	-0.965854	0.042	0.123	9.43e-10
SLC39A14	2.94205e-20	-1.36874	0.279	0.386	6.96854e-16	SP110	1.48594e-12	-0.595067	0.084	0.202	3.5196e-08	CREB5	4.56116e-22	0.790651	0.696	0.549	1.08036e-17	KIDINS220	1.22988e-28	0.767231	0.656	0.617	2.91308e-24	MFAP4	4.59e-14	-1.29701	0.031	0.104	1.09e-09
GNG11	3.06925e-20	-0.545287	0.075	0.16	7.26982e-16	LRP6	1.51087e-12	0.672235	0.826	0.827	3.57865e-08	UGT8	4.6536e-22	0.521797	0.966	0.961	1.10225e-17	SPATS2L	1.66175e-28	-0.709992	0.66	0.727	3.93603e-24	PRIMA1	4.69e-14	-0.69508	0.033	0.107	1.11e-09
GAD1	3.08251e-20	1.26871	0.404	0.299	7.30124e-16	PALMD	1.64477e-12	-0.732075	0.029	0.117	3.89579e-08	ZNF626	5.15033e-22	0.826211	0.784	0.711	1.21991e-17	FBXO32	1.80493e-28	-0.870233	0.097	0.192	4.27516e-24	S1PR1	5.49e-14	-0.855039	0.046	0.131	1.3e-09
TOP2A	3.09695e-20	-0.511653	0.145	0.249	7.33543e-16	SRGAP1	1.96339e-12	0.660718	0.81	0.731	4.65049e-08	ATAT1	5.25902e-22	0.551087	0.761	0.679	1.24565e-17	TCEAL2	1.86494e-28	0.989006	0.214	0.121	4.41731e-24	LUZP2	6.22e-14	-0.584312	0.515	0.658	1.47e-09
ROBO1	3.4206e-20	0.565165	0.711	0.626	8.10204e-16	PCDHB5	1.96703e-12	-0.551383	0.196	0.339	4.6591e-08	PODXL2	5.49145e-22	0.725401	0.598	0.456	1.3007e-17	GLI2	2.02292e-28	0.647937	0.217	0.124	4.79149e-24	GCN1L1	6.55e-14	0.57116	0.462	0.314	1.55e-09
DUSP26	3.72796e-20	0.831728	0.191	0.097	8.83005e-16	PDGFD	1.96706e-12	-0.549789	0.055	0.157	4.65919e-08	PRPS1	6.42557e-22	-0.691824	0.272	0.446	1.52196e-17	NOL4	2.16801e-28	0.571895	0.246	0.143	5.13516e-24	RASL10A	6.65e-14	-0.585662	0.085	0.191	1.58e-09
MAPK10	3.76244e-20	0.829755	0.486	0.367	8.91171e-16	TM4SF1	2.09338e-12	0.501352	0.598	0.46	4.95838e-08	TMOD2	7.58926e-22	0.826665	0.846	0.789	1.79759e-17	TWIST2	2.17848e-28	1.07065	0.106	0.041	5.15994e-24	CCDC80	7e-14	-0.903715	0.027	0.097	1.66e-09
SCML1	4.02245e-20	-0.624301	0.164	0.268	9.52756e-16	NT5DC1	2.11057e-12	-0.971672	0.031	0.118	4.9991e-08	CCDC74A	7.84014e-22	-0.57307	0.16	0.317	1.85702e-17	TMEM176A	2.52082e-28	-1.27256	0.094	0.185	5.97081e-24	C3orf58	7.21e-14	-0.997535	0.118	0.23	1.71e-09
DRP2	4.57705e-20	0.593765	0.166	0.079	1.08412e-15	ASIC1	2.19738e-12	0.8303	0.323	0.187	5.20472e-08	GLRB	8.44471e-22	1.24936	0.376	0.22	2.00021e-17	SPC24	2.98364e-28	-0.647855	0.026	0.092	7.06705e-24	LYNX1	7.42e-14	-0.687696	0.118	0.232	1.76e-09
APBB1	5.86364e-20	0.59853	0.648	0.56	1.38886e-15	NRXN2	2.41802e-12	0.529079	0.531	0.396	5.72731e-08	NDP	8.46317e-22	-2.5229	0.058	0.167	2.00459e-17	GTF2IP1	3.16325e-28	0.615384	0.79	0.786	7.49247e-24	SYBU	7.68e-14	-0.653858	0.213	0.351	1.82e-09
PIK3C2B	6.2841e-20	0.737795	0.75	0.702	1.48845e-15	HMGCLL1	2.50621e-12	-1.50027	0.034	0.122	5.93621e-08	KCNMA1	9.37498e-22	0.503857	0.344	0.18	2.22056e-17	SEMA6D	3.21266e-28	0.694271	0.654	0.585	7.6095e-24	LDOC1L	8.08e-14	0.593245	0.593	0.453	1.91e-09
RNF122	6.35284e-20	0.585752	0.421	0.299	1.50473e-15	KHDRBS2	2.85345e-12	-0.754609	0.172	0.303	6.75868e-08	PLXNA4	9.56256e-22	-0.907336	0.11	0.246	2.26499e-17	KIAA0408	4.387e-28	0.717004	0.624	0.561	1.0391e-23	BCAR1	8.45e-14	0.726834	0.384	0.238	2e-09
LRP4	6.55038e-20	0.774487	0.564	0.47	1.55152e-15	CFB	2.98817e-12	-1.17871	0.044	0.138	7.07777e-08	FBXO27	9.58909e-22	0.555991	0.796	0.75	2.27127e-17	LUM	4.68195e-28	-1.39933	0.01	0.062	1.10897e-23	ALDH1L1	8.58e-14	-0.805605	0.074	0.172	2.03e-09
FUT9	6.64731e-20	0.591411	0.417	0.314	1.57448e-15	CDKN3	3.08791e-12	-0.750511	0.118	0.245	7.31403e-08	CHRM3	9.66885e-22	0.566163	0.866	0.854	2.29016e-17	KCND2	5.52918e-28	1.20407	0.072	0.02	1.30964e-23	RHOJ	9.88e-14	-0.860679	0.113	0.224	2.34e-09
RFTN2	6.7456e-20	0.678481	0.597	0.496	1.59776e-15	MAPK8IP1	3.10071e-12	-0.642361	0.4	0.564	7.34435e-08	CHPF	9.77415e-22	-0.644306	0.356	0.532	2.31511e-17	UBE2QL1	6.4683e-28	1.01408	0.117	0.049	1.53208e-23	PCDH8	1.05e-13	-0.934052	0.048	0.132	2.48e-09
APLN	6.85423e-20	-0.616194	0.018	0.069	1.62349e-15	GPD1L	3.19958e-12	-0.537966	0.188	0.333	7.57853e-08	CDC42EP3	1.13575e-21	-1.56085	0.248	0.407	2.69013e-17	ZNF536	7.47814e-28	0.563745	0.691	0.638	1.77127e-23	ZNF300	1.06e-13	0.887863	0.28	0.149	2.51e-09
SLC16A1	7.79793e-20	-0.584047	0.605	0.721	1.84702e-15	GDAP1L1	3.20659e-12	0.824046	0.286	0.155	7.59513e-08	LOC440300	1.28919e-21	0.6198	0.889	0.852	3.05359e-17	RAB6B	9.11239e-28	0.848129	0.311	0.213	2.15836e-23	DNASE2	1.11e-13	-0.609468	0.29	0.431	2.64e-09
GRIA1	7.81304e-20	0.959075	0.226	0.13	1.8506e-15	RAB32	3.49737e-12	-0.942202	0.009	0.078	8.28386e-08	ZDHHC11	1.48295e-21	1.21571	0.468	0.33	3.51252e-17	RPH3A	1.49439e-27	0.743745	0.311	0.203	3.53961e-23	ING3	1.23e-13	-0.572968	0.467	0.613	2.92e-09
CLEC2B	9.93825e-20	-1.45436	0.056	0.129	2.35397e-15	ABCG1	3.63073e-12	0.725191	0.272	0.145	8.59976e-08	S100A13	1.82711e-21	-2.00381	0.106	0.234	4.3277e-17	PLXDC2	1.56771e-27	1.01719	0.316	0.217	3.71329e-23	ADHFE1	1.24e-13	-0.668824	0.226	0.364	2.94e-09
SYNPO	1.04365e-19	-0.666993	0.105	0.195	2.472e-15	NAMPT	3.79734e-12	-0.64593	0.427	0.595	8.99437e-08	AGPAT2	2.09843e-21	-0.502025	0.056	0.171	4.97034e-17	PCNXL2	1.70304e-27	0.591506	0.222	0.131	4.03383e-23	AES	1.47e-13	0.535832	0.442	0.284	3.47e-09
MYZAP	1.05213e-19	-1.22215	0.017	0.067	2.49208e-15	AKAP12	3.90294e-12	-0.581994	0.471	0.626	9.2445e-08	CPNE5	2.31482e-21	-0.692475	0.055	0.167	5.48287e-17	ABCC6	1.85262e-27	-1.02109	0.023	0.085	4.38812e-23	MAP3K1	1.49e-13	0.633356	0.282	0.149	3.53e-09
NEFM	1.10615e-19	0.921489	0.091	0.027	2.62002e-15	CENPQ	3.96438e-12	-0.532873	0.092	0.209	9.39002e-08	MAFF	2.38358e-21	0.892944	0.561	0.442	5.64575e-17	TP53BP1	2.09705e-27	0.676883	0.693	0.664	4.96708e-23	SLC4A10	1.54e-13	0.596519	0.322	0.181	3.64e-09
STXBP5L	1.13031e-19	0.640796	0.266	0.162	2.67725e-15	RIMS4	4.06696e-12	-0.862193	0.106	0.226	9.633e-08	GOLGA8A	2.42425e-21	0.67066	0.818	0.722	5.74207e-17	CEP170	2.27048e-27	0.56378	0.82	0.83	5.37787e-23	KLRK1	1.6e-13	0.902286	0.198	0.081	3.79e-09
CDK1	1.14262e-19	-0.509311	0.127	0.226	2.7064e-15	CDH13	4.3484e-12	1.01787	0.161	0.062	1.02996e-07	CLU	2.47045e-21	-1.08768	0.426	0.558	5.8515e-17	ARHGAP21	2.65716e-27	0.797284	0.447	0.357	6.29374e-23	NAA25	1.71e-13	0.727637	0.42	0.277	4.05e-09
CXorf28	1.15136e-19	1.41478	0.099	0.032	2.72711e-15	HAPLN3	4.4867e-12	-0.732684	0.056	0.156	1.06272e-07	COL11A2	3.23686e-21	-0.963296	0.323	0.47	7.66683e-17	TSPAN15	2.89399e-27	-0.607485	0.101	0.196	6.85471e-23	SLC3A2	1.89e-13	-0.793748	0.541	0.646	4.48e-09
RTKN	1.17145e-19	0.718707	0.586	0.499	2.77469e-15	COBL	4.61936e-12	1.02708	0.332	0.204	1.09414e-07	CELF2	3.433e-21	0.686505	0.822	0.767	8.1314e-17	RGS9	2.92667e-27	1.12401	0.062	0.015	6.93211e-23	ROBO2	1.92e-13	-0.618087	0.047	0.128	4.54e-09
CKS1B	1.26412e-19	-0.607507	0.323	0.44	2.9942e-15	SOX6	4.84438e-12	0.718493	0.78	0.74	1.14744e-07	TMEM35	4.02763e-21	1.01598	0.325	0.172	9.53983e-17	UNC80	3.01334e-27	0.596487	0.49	0.388	7.1374e-23	UCHL1	1.98e-13	0.506462	0.489	0.34	4.68e-09
THBS1	1.31046e-19	-1.1259	0.043	0.11	3.10396e-15	CEP170	5.00202e-12	0.677519	0.829	0.859	1.18478e-07	AP3B2	4.05981e-21	1.03997	0.387	0.232	9.61606e-17	FLJ11235	3.73503e-27	0.780288	0.128	0.058	8.84679e-23	ADCY2	2.26e-13	-0.773189	0.214	0.342	5.35e-09
RGMB	1.36321e-19	1.09823	0.588	0.511	3.22891e-15	STON1	5.02686e-12	-0.58421	0.184	0.314	1.19066e-07	ALDH1A3	4.51516e-21	2.17101	0.173	0.058	1.06946e-16	CACNB4	4.32845e-27	0.745502	0.122	0.053	1.02524e-22	LOXL3	2.6e-13	0.666353	0.233	0.108	6.16e-09
BUB1B	1.3642e-19	-0.583354	0.087	0.174	3.23124e-15	TXLNB	5.19875e-12	-0.586347	0.013	0.084	1.23138e-07	ACTN2	5.01436e-21	0.890218	0.485	0.332	1.1877e-16	TFDP2	4.3428e-27	0.538309	0.954	0.929	1.02863e-22	IFIT1	2.63e-13	-0.907303	0.305	0.433	6.22e-09
ERO1L	1.47342e-19	-1.77284	0.087	0.168	3.48995e-15	DCN	5.42076e-12	-1.29643	0.048	0.145	1.28396e-07	KANK1	5.77195e-21	0.645776	0.718	0.612	1.36714e-16	TTC29	4.40878e-27	-0.848544	0.007	0.055	1.04426e-22	RPRM	2.96e-13	0.500599	0.202	0.084	7.02e-09
CLCF1	1.53387e-19	-0.816573	0.015	0.064	3.63313e-15	CTTNBP2	5.62446e-12	1.01842	0.59	0.514	1.33221e-07	DNASE2	6.11285e-21	-0.566691	0.282	0.434	1.44789e-16	PPP1R14A	4.66569e-27	-0.727606	0.016	0.072	1.10512e-22	SIAE	3.08e-13	-0.626592	0.16	0.282	7.3e-09
TIFA	1.57976e-19	-0.595105	0.063	0.14	3.74182e-15	PHLDA2	5.84862e-12	-1.11683	0.062	0.166	1.38531e-07	TOP2A	7.44294e-21	-0.715881	0.147	0.294	1.76294e-16	TRIM9	5.01045e-27	0.954803	0.421	0.329	1.18678e-22	EHD3	3.44e-13	0.640602	0.449	0.317	8.15e-09
ERBB3	1.70801e-19	1.04274	0.319	0.219	4.04559e-15	RUFY3	6.1213e-12	0.608789	0.906	0.939	1.44989e-07	APOBEC3B	7.95766e-21	-1.53849	0.019	0.102	1.88485e-16	CNTNAP4	5.21805e-27	0.826128	0.072	0.021	1.23595e-22	GAK	3.73e-13	0.516152	0.449	0.303	8.84e-09
ZNF488	1.75841e-19	1.4688	0.085	0.024	4.16497e-15	CD74	6.93153e-12	-1.8517	0.042	0.13	1.6418e-07	DDX17	7.97056e-21	0.565066	0.974	0.982	1.88791e-16	CSAG1	6.12352e-27	-0.726033	0.04	0.11	1.45042e-22	PTPN13	3.8e-13	0.541614	0.203	0.088	9.01e-09
VIPR2	2.31264e-19	0.932863	0.543	0.459	5.47773e-15	CENPW	7.49311e-12	-0.579019	0.154	0.292	1.77482e-07	PSD2	8.03988e-21	0.509773	0.282	0.13	1.90433e-16	GRIN2A	6.22393e-27	0.813312	0.169	0.088	1.4742e-22	GDAP1	3.8e-13	0.591934	0.641	0.528	9.01e-09
ONECUT2	2.37025e-19	0.520461	0.166	0.08	5.61417e-15	NMB	7.60247e-12	-0.540557	0.08	0.193	1.80072e-07	PLTP	8.15676e-21	-0.541271	0.285	0.445	1.93201e-16	CEP68	6.80555e-27	0.763347	0.826	0.795	1.61196e-22	SASH1	3.81e-13	-0.584294	0.673	0.782	9.01e-09
REC8	2.70849e-19	1.08796	0.4	0.298	6.41534e-15	PAFAH1B2	7.8563e-12	0.888387	0.962	0.962	1.86084e-07	ATP10B	8.58381e-21	0.958537	0.2	0.077	2.03316e-16	DDR1	7.43786e-27	0.775503	0.301	0.202	1.76173e-22	MAD2L2	4.09e-13	0.533341	0.346	0.202	9.69e-09
COL5A1	2.74622e-19	-0.631319	0.042	0.108	6.50469e-15	NFKBIA	7.89944e-12	-0.692694	0.331	0.491	1.87106e-07	HSPB1	9.19323e-21	-1.1263	0.511	0.654	2.17751e-16	INSRR	7.70785e-27	0.51865	0.153	0.075	1.82568e-22	ARHGAP26	4.59e-13	-0.886418	0.723	0.793	1.09e-08
HILPDA	2.75946e-19	-1.59202	0.503	0.59	6.53606e-15	NDNF	8.41863e-12	-0.700029	0.006	0.067	1.99404e-07	CENPW	9.6199e-21	-0.550573	0.129	0.27	2.27857e-16	NDP	7.83529e-27	1.29159	0.096	0.036	1.85587e-22	HELZ	5.62e-13	0.542042	0.777	0.724	1.33e-08
SLC2A1	2.77026e-19	-1.06959	0.276	0.387	6.56164e-15	SEMA3B	8.87708e-12	-0.737379	0.091	0.206	2.10263e-07	GSG1L	1.05259e-20	0.694028	0.228	0.092	2.49318e-16	SMIM17	8.66758e-27	0.958479	0.663	0.617	2.053e-22	MYLIP	6.53e-13	-1.08745	0.089	0.188	1.55e-08
TIA1	3.07621e-19	0.574387	0.828	0.772	7.28631e-15	EVA1C	9.32919e-12	-0.740235	0.028	0.11	2.20971e-07	CALM1	1.15133e-20	0.84837	0.947	0.961	2.72705e-16	CPEB4	8.89895e-27	0.739484	0.458	0.363	2.10781e-22	LAMTOR4	6.56e-13	-0.546232	0.64	0.716	1.55e-08
RNASE4	3.22249e-19	-0.794064	0.05	0.121	7.6328e-15	MAMDC2	9.50886e-12	-0.605702	0.062	0.164	2.25227e-07	PDZD2	1.28954e-20	1.40289	0.332	0.185	3.0544e-16	DLGAP5	9.13093e-27	-0.536578	0.04	0.111	2.16275e-22	HTT	7.09e-13	0.50243	0.385	0.246	1.68e-08
COL6A2	3.29482e-19	-0.816132	0.061	0.136	7.80411e-15	FXYD7	1.05112e-11	-0.640321	0.174	0.305	2.48969e-07	RFPL1-AS1	1.42215e-20	0.67093	0.67	0.57	3.3685e-16	CPZ	9.30852e-27	0.99208	0.085	0.028	2.20482e-22	TYRO3	7.6e-13	0.721194	0.419	0.285	1.8e-08
DGKB	4.02049e-19	0.752304	0.809	0.775	9.52294e-15	TCF4	1.05399e-11	0.524288	0.951	0.961	2.49648e-07	MAPK10	1.57557e-20	0.713122	0.435	0.271	3.73189e-16	TNRC6B	1.06287e-26	0.555313	0.878	0.9	2.51753e-22	GADD45GIP1	8.47e-13	-0.643345	0.688	0.753	2.01e-08
REEP4	4.55844e-19	-0.513127	0.114	0.209	1.07971e-14	BPIFC	1.07564e-11	-0.512818	0.005	0.064	2.54776e-07	KHDRBS3	1.70585e-20	0.803899	0.522	0.367	4.04048e-16	PCBP3	1.2893e-26	0.933821	0.378	0.278	3.05384e-22	RNF10	8.86e-13	0.549679	0.537	0.402	2.1e-08
CCDC74A	5.4185e-19	-0.672025	0.126	0.224	1.28342e-14	UNC5B	1.10599e-11	-0.958799	0.066	0.168	2.61964e-07	ASIC1	1.72463e-20	0.599761	0.365	0.206	4.08496e-16	PDE6H	1.38176e-26	-1.49612	0.013	0.066	3.27283e-22	ZC2HC1A	8.86e-13	0.516762	0.485	0.335	2.1e-08
PRC1	5.4763e-19	-0.630026	0.182	0.284	1.29712e-14	RPH3A	1.1456e-11	1.18345	0.192	0.087	2.71348e-07	C1QL1	1.80435e-20	0.508881	0.426	0.263	4.27378e-16	POC1A	1.50748e-26	-0.72632	0.036	0.104	3.57061e-22	DGCR6	1e-12	-0.855749	0.541	0.636	2.38e-08
EPAS1	6.026e-19	-1.29642	0.326	0.442	1.42732e-14	SLITRK3	1.1891e-11	0.958309	0.414	0.289	2.81651e-07	CACNA1D	2.0024e-20	0.591362	0.229	0.097	4.74289e-16	SNCA	1.55301e-26	1.26726	0.166	0.087	3.67845e-22	PPP2R5A	1.08e-12	-1.12247	0.061	0.146	2.55e-08
BCL11A	6.05036e-19	0.770371	0.34	0.234	1.43309e-14	C19orf66	1.20271e-11	-0.556721	0.08	0.189	2.84875e-07	SLC1A1	2.05516e-20	0.631646	0.712	0.566	4.86785e-16	ADAM22	1.76775e-26	0.990895	0.274	0.181	4.18709e-22	SSTR1	1.14e-12	0.830023	0.264	0.142	2.7e-08
KIAA1549	6.2951e-19	0.528256	0.58	0.485	1.49106e-14	FAIM2	1.34482e-11	0.657506	0.455	0.317	3.18535e-07	SCN8A	2.10453e-20	0.527465	0.323	0.178	4.98479e-16	PLXNB2	1.95629e-26	0.788001	0.728	0.735	4.63367e-22	TGFBR3	1.21e-12	-0.557262	0.118	0.228	2.86e-08
CDC20	6.96387e-19	-1.13972	0.094	0.177	1.64946e-14	FOSL1	1.41166e-11	-1.50167	0.052	0.149	3.34366e-07	UGDH	2.13904e-20	0.76518	0.827	0.764	5.06654e-16	EGFR	2.14006e-26	0.504425	0.119	0.052	5.06894e-22	TLE1	1.35e-12	-0.945772	0.039	0.112	3.19e-08
HIP1R	7.04295e-19	0.545582	0.59	0.507	1.66819e-14	NLGN1	1.47002e-11	0.834837	0.732	0.687	3.48188e-07	FAM198B	2.38633e-20	-0.94614	0.049	0.154	5.65227e-16	PDC	2.41866e-26	-1.80823	0.038	0.105	5.72885e-22	LOC645513	1.37e-12	0.669878	0.398	0.266	3.25e-08
PGK1	7.06304e-19	-0.745545	0.876	0.929	1.67295e-14	RFX2	1.48831e-11	-0.799071	0.063	0.163	3.52522e-07	FLRT1	2.99419e-20	0.969236	0.359	0.211	7.09204e-16	CCNA2	2.71409e-26	-0.58865	0.089	0.177	6.4286e-22	SMG1P1	1.39e-12	0.516419	0.705	0.599	3.3e-08
VASH1	7.1865e-19	0.698366	0.5	0.401	1.70219e-14	PRPS2	1.53894e-11	-0.546674	0.195	0.329	3.64513e-07	NEUROD1	3.06903e-20	1.22309	0.119	0.024	7.26929e-16	DISP2	3.17995e-26	0.815846	0.296	0.198	7.53203e-22	NEDD4L	1.44e-12	-0.544196	0.271	0.407	3.42e-08
MEIS3	7.51725e-19	0.55917	0.362	0.253	1.78054e-14	NDUFA4L2	1.54006e-11	-1.26138	0.04	0.128	3.6478e-07	ACTL6B	3.12004e-20	1.27466	0.204	0.081	7.39013e-16	ZNF516	4.3442e-26	0.719761	0.114	0.049	1.02897e-21	PCDHGA7	1.48e-12	0.752619	0.292	0.162	3.51e-08
GJA1	8.46651e-19	-0.710483	0.182	0.286	2.00538e-14	SHISA7	1.55692e-11	0.937998	0.246	0.133	3.68771e-07	CENPF	3.22403e-20	-0.773763	0.245	0.4	7.63645e-16	MXD3	4.63324e-26	-0.76285	0.101	0.192	1.09743e-21	TUBB4B	1.67e-12	-0.754194	0.643	0.724	3.96e-08
CORO7	8.95233e-19	0.61161	0.406	0.3	2.12045e-14	GADD45B	1.72757e-11	-1.004	0.168	0.306	4.09193e-07	CHST11	3.3151e-20	0.977765	0.543	0.416	7.85214e-16	TRH	5.692e-26	2.0978	0.056	0.013	1.34821e-21	PAX6	1.67e-12	-0.804001	0.143	0.253	3.96e-08
PLAUR	9.02565e-19	-0.802893	0.072	0.15	2.13781e-14	GJA1	1.73911e-11	-0.998623	0.155	0.278	4.11925e-07	TLE2	3.37486e-20	1.15958	0.108	0.018	7.9937e-16	CDC6	5.96297e-26	-0.58984	0.256	0.36	1.41239e-21	FAM13A	1.74e-12	0.627482	0.395	0.254	4.13e-08
DAB1	1.04454e-18	0.581562	0.102	0.035	2.4741e-14	CPVL	2.05166e-11	-1.42035	0.034	0.118	4.85956e-07	ANGEL1	3.66238e-20	0.922395	0.398	0.242	8.67471e-16	NPTXR	6.01842e-26	0.677363	0.407	0.327	1.42552e-21	PKD2	1.88e-12	0.670492	0.319	0.187	4.46e-08
PAPSS1	1.07844e-18	0.608664	0.596	0.515	2.5544e-14	PCDHB7	2.1376e-11	-1.07532	0.145	0.261	5.06312e-07	COLEC12	4.19532e-20	-0.672712	0.03	0.119	9.93703e-16	IRX6	8.45835e-26	-1.38277	0.024	0.083	2.00345e-21	CLSTN3	2e-12	0.743053	0.322	0.188	4.75e-08
TRPC4	1.09292e-18	0.964943	0.106	0.037	2.58869e-14	IGDCC3	2.22235e-11	-0.694191	0.14	0.261	5.26387e-07	AQP1	4.31412e-20	-0.511937	0.045	0.147	1.02184e-15	TMEM35	9.52421e-26	0.820539	0.259	0.164	2.2559e-21	SMPD3	2.24e-12	0.540498	0.389	0.254	5.31e-08
CPEB4	1.18743e-18	0.505558	0.772	0.694	2.81255e-14	SHC1	2.39651e-11	-0.799428	0.337	0.491	5.67637e-07	KCTD12	4.54819e-20	-0.971342	0.17	0.319	1.07728e-15	SLC6A15	1.14336e-25	0.987625	0.323	0.224	2.70817e-21	HSD17B14	2.4e-12	-0.678285	0.128	0.239	5.69e-08
LDOC1	1.2383e-18	0.605972	0.368	0.254	2.93303e-14	SHD	2.50853e-11	0.711899	0.296	0.168	5.9417e-07	KIF5C	5.31622e-20	0.772262	0.642	0.513	1.2592e-15	DNM3	1.29521e-25	1.07136	0.132	0.062	3.06782e-21	SH3GL1	2.82e-12	-0.618998	0.33	0.467	6.68e-08
AMPH	1.255e-18	0.804748	0.207	0.113	2.9726e-14	SPOCK2	2.54084e-11	-0.677758	0.189	0.321	6.01823e-07	KLF4	5.78169e-20	1.37897	0.217	0.091	1.36945e-15	TGIF2LX	1.67538e-25	1.22573	0.039	0.005	3.9683e-21	DIO2	2.91e-12	-0.785806	0.099	0.198	6.89e-08
GPRC5A	1.32806e-18	-1.27509	0.013	0.057	3.14564e-14	CA9	2.55344e-11	-1.6491	0.023	0.099	6.04809e-07	KCNH8	5.96865e-20	1.03085	0.334	0.19	1.41373e-15	SOBP	1.80843e-25	0.547533	0.358	0.258	4.28346e-21	SBDS	2.92e-12	-0.522424	0.679	0.752	6.91e-08
KDELR3	1.33426e-18	-0.760933	0.047	0.114	3.16034e-14	SPTLC3	2.56819e-11	-0.654181	0.009	0.072	6.08301e-07	TMEM196	6.69287e-20	1.20621	0.167	0.055	1.58527e-15	CCDC88A	1.82252e-25	0.631432	0.722	0.697	4.31682e-21	PCDHB5	3.21e-12	0.50106	0.631	0.483	7.59e-08
CPNE8	1.41391e-18	-0.724789	0.046	0.113	3.34898e-14	RECK	2.69078e-11	-0.518323	0.197	0.331	6.37339e-07	NOTCH1	7.9845e-20	0.521797	0.789	0.727	1.89121e-15	KDM5B	2.30996e-25	0.551824	0.636	0.549	5.47136e-21	ANGPT1	3.35e-12	-0.841859	0.01	0.057	7.94e-08
TANC1	1.48281e-18	0.614788	0.745	0.697	3.51219e-14	SOCS3	2.7055e-11	-0.50713	0.279	0.44	6.40824e-07	ANK3	9.04505e-20	0.683829	0.465	0.31	2.14241e-15	SLC45A1	3.3664e-25	0.771911	0.084	0.03	7.97366e-21	CSTB	3.48e-12	-0.717954	0.378	0.501	8.24e-08
IGFBPL1	1.67881e-18	0.98119	0.458	0.363	3.97643e-14	PAX2	2.7823e-11	-0.581654	0.007	0.067	6.59016e-07	SLC8A1	1.07145e-19	0.925608	0.243	0.111	2.53784e-15	ZCCHC12	3.5853e-25	0.981739	0.195	0.112	8.49215e-21	CHRM1	3.7e-12	0.678983	0.205	0.093	8.77e-08
LOXL2	1.68743e-18	-1.18694	0.14	0.23	3.99686e-14	GEM	2.7876e-11	-0.564092	0.063	0.165	6.60272e-07	C21orf62	1.09338e-19	0.530547	0.861	0.846	2.58978e-15	FILIP1L	3.60185e-25	1.50096	0.202	0.122	8.53134e-21	PCDH11X	3.82e-12	0.726114	0.907	0.868	9.06e-08
UBE2T	1.72497e-18	-0.822344	0.179	0.282	4.08577e-14	RERG	2.86529e-11	-1.04795	0.005	0.062	6.78673e-07	ADAMTS9	1.29818e-19	-1.10055	0.093	0.211	3.07487e-15	HSPB8	3.76784e-25	-0.527195	0.14	0.239	8.92451e-21	PTGDS	3.9e-12	1.08679	0.208	0.095	9.24e-08
SORBS2	1.96599e-18	0.712975	0.199	0.108	4.65664e-14	EVA1A	2.97618e-11	-1.18028	0.005	0.062	7.04939e-07	CD44	1.45471e-19	-0.897467	0.064	0.173	3.44563e-15	ADRA1A	3.84242e-25	0.622865	0.703	0.667	9.10116e-21	OSBPL1A	3.95e-12	-0.776339	0.114	0.22	9.36e-08
SCAMP5	2.00596e-18	0.654868	0.352	0.24	4.75131e-14	GRTP1	3.04255e-11	-0.545827	0.013	0.08	7.20658e-07	LTBP1	1.58761e-19	-1.20891	0.023	0.104	3.76041e-15	RARRES2	4.27908e-25	-0.659347	0.063	0.141	1.01354e-20	FA2H	4.05e-12	0.745299	0.362	0.23	9.59e-08
AURKB	2.05032e-18	-0.744599	0.061	0.135	4.85639e-14	PHYHIPL	3.18281e-11	1.00838	0.498	0.378	7.53881e-07	GATSL3	1.66949e-19	-0.777149	0.038	0.133	3.95434e-15	GABRG2	4.55703e-25	-0.851225	0.27	0.393	1.07938e-20	UNC119	4.7e-12	-0.578253	0.232	0.36	1.11e-07
ANKUB1	2.40719e-18	-0.602142	0.003	0.035	5.70167e-14	SHC3	3.39472e-11	0.874203	0.584	0.489	8.04073e-07	CA2	2.04977e-19	-1.10928	0.034	0.124	4.85509e-15	ANKRD36B	4.59308e-25	0.591483	0.849	0.847	1.08792e-20	THSD1	4.91e-12	-1.16819	0.037	0.106	1.16e-07
DLGAP1-AS5	2.63575e-18	0.656216	0.087	0.026	6.24304e-14	TGFBI	3.5713e-11	-1.67674	0.038	0.124	8.45897e-07	PIWIL2	2.37004e-19	1.02737	0.592	0.485	5.61369e-15	HIST1H3B	4.80309e-25	-0.837438	0.035	0.1	1.13766e-20	CKS1B	4.98e-12	-0.729294	0.18	0.299	1.18e-07
ZMAT4	2.75736e-18	-0.648545	0.041	0.104	6.53109e-14	FGF2	3.78613e-11	-0.530604	0.121	0.237	8.96782e-07	2021-09-11	2.45282e-19	-0.51532	0.624	0.733	5.80976e-15	SMPD3	4.84294e-25	0.850704	0.301	0.209	1.1471e-20	PTPRE	5.35e-12	0.540767	0.67	0.562	1.27e-07
CD200	2.92724e-18	1.15584	0.253	0.159	6.93346e-14	FOLH1	4.11253e-11	-1.76941	0.064	0.161	9.74094e-07	SPA17	2.59169e-19	-0.579778	0.075	0.191	6.13867e-15	DRD2	5.25113e-25	0.727703	0.08	0.027	1.24378e-20	FAM76A	5.53e-12	-0.618599	0.236	0.372	1.31e-07
KCNA2	3.1119e-18	0.885532	0.346	0.243	7.37085e-14	EMILIN1	4.69397e-11	-0.654566	0.043	0.131	1.11181e-06	C2orf80	2.63957e-19	1.86724	0.191	0.075	6.25209e-15	IER3	5.53046e-25	-1.18141	0.061	0.137	1.30994e-20	MIR10B	5.56e-12	-0.64806	0.002	0.036	1.32e-07
CPM	3.21654e-18	2.26374	0.827	0.803	7.61871e-14	ZDHHC22	4.81807e-11	1.04856	0.424	0.302	1.14121e-06	IRF1	2.76587e-19	0.703	0.907	0.892	6.55124e-15	CDC25C	5.68266e-25	-0.567983	0.041	0.109	1.34599e-20	CD46	5.8e-12	0.632417	0.547	0.426	1.37e-07
RAP2A	3.29715e-18	0.678795	0.363	0.258	7.80963e-14	NOL4	5.01101e-11	0.695219	0.422	0.281	1.18691e-06	PCDH20	2.7686e-19	1.3182	0.245	0.116	6.5577e-15	XKR4	5.93729e-25	0.947262	0.078	0.026	1.40631e-20	NKD1	5.92e-12	0.646304	0.607	0.561	1.4e-07
CCND1	3.38356e-18	0.760804	0.436	0.329	8.01431e-14	PDE1A	5.42786e-11	-0.927654	0.049	0.139	1.28564e-06	ZNF483	2.91034e-19	0.760124	0.849	0.818	6.89342e-15	JPH4	6.41397e-25	0.553065	0.135	0.065	1.51921e-20	AEBP2	6.58e-12	0.617358	0.314	0.184	1.56e-07
EFCAB4B	3.6382e-18	-0.667128	0.028	0.083	8.61743e-14	RAB3IP	5.58915e-11	0.614906	0.81	0.767	1.32385e-06	KCNIP4	3.08233e-19	0.771202	0.361	0.206	7.30081e-15	KIF20A	7.63433e-25	-0.710141	0.042	0.11	1.80827e-20	PLAC9	6.84e-12	-1.69231	0.008	0.051	1.62e-07
TMEM71	3.72508e-18	-0.839124	0.037	0.098	8.82323e-14	GIMAP7	5.68216e-11	-0.94545	0.002	0.055	1.34588e-06	LPHN3	3.10897e-19	0.759388	0.714	0.639	7.36392e-15	GLT8D2	9.87929e-25	-0.589472	0.137	0.235	2.34001e-20	PSME2	6.86e-12	-0.666411	0.34	0.463	1.62e-07
LMO1	4.4288e-18	1.02431	0.262	0.164	1.049e-13	USP11	5.74058e-11	0.523641	0.895	0.918	1.35971e-06	MIF	3.25041e-19	-0.511147	0.928	0.952	7.69893e-15	CLEC18A	1.09668e-24	1.63891	0.169	0.094	2.59759e-20	SCARA5	7.17e-12	-0.619834	0.046	0.122	1.7e-07
GPC4	4.64279e-18	-0.523604	0.109	0.198	1.09969e-13	WDR78	6.09168e-11	-0.578584	0.042	0.128	1.44288e-06	TNRC6C	3.30214e-19	0.752477	0.775	0.713	7.82146e-15	FAM126B	1.1694e-24	0.572032	0.884	0.872	2.76984e-20	CCM2	7.3e-12	-0.799426	0.166	0.28	1.73e-07
CPSF6	4.91502e-18	1.0504	0.853	0.814	1.16417e-13	ALDH1L1	6.116e-11	-0.81111	0.044	0.133	1.44864e-06	PCBP4	3.53952e-19	0.653998	0.74	0.669	8.3837e-15	ASPDH	1.18269e-24	1.04331	0.077	0.026	2.80132e-20	CHRNA7	7.41e-12	-0.893356	0.289	0.413	1.75e-07
KLRK1	5.04121e-18	0.824068	0.112	0.043	1.19406e-13	STEAP1	6.20131e-11	-0.673583	0.059	0.154	1.46884e-06	NTAN1	3.98478e-19	-0.811901	0.084	0.201	9.43835e-15	ENO2	1.21263e-24	0.530492	0.798	0.811	2.87223e-20	MAP1LC3A	7.5e-12	-0.561123	0.232	0.364	1.78e-07
PTPN5	5.09022e-18	0.769427	0.116	0.045	1.20567e-13	CPNE4	6.75927e-11	-0.759927	0.017	0.087	1.601e-06	LZTS1	4.11622e-19	-0.626547	0.227	0.369	9.74967e-15	LOC728392	1.79724e-24	0.984051	0.089	0.034	4.25694e-20	FAM222A	7.84e-12	0.670712	0.271	0.15	1.86e-07
KIF2C	6.33289e-18	-0.828684	0.106	0.191	1.50001e-13	REEP4	7.20926e-11	-0.740591	0.086	0.194	1.70759e-06	ANO4	4.37375e-19	1.22521	0.182	0.068	1.03597e-14	GPR85	1.86572e-24	1.17334	0.178	0.1	4.41915e-20	LMBR1L	7.85e-12	0.542494	0.311	0.181	1.86e-07
SNAP25	6.95073e-18	0.844122	0.27	0.169	1.64635e-13	LOC154761	7.28529e-11	-0.509305	0.096	0.205	1.72559e-06	ILDR2	4.38043e-19	0.707311	0.724	0.637	1.03755e-14	GPM6B	1.96166e-24	0.700494	0.53	0.444	4.6464e-20	ABCC5	8.45e-12	0.557345	0.586	0.459	2e-07
HHIP	1.15844e-17	-2.4099	0.084	0.159	2.74387e-13	C5orf4	8.31479e-11	-0.547489	0.085	0.192	1.96944e-06	PPAPDC1A	4.69792e-19	1.19584	0.373	0.229	1.11275e-14	CRB1	2.07065e-24	0.838848	0.14	0.069	4.90454e-20	HIST2H2BE	8.62e-12	-0.606165	0.133	0.242	2.04e-07
ZC2HC1A	1.15954e-17	0.602598	0.471	0.363	2.7465e-13	CYB5R2	8.61164e-11	-0.778211	0.016	0.084	2.03975e-06	SCFD2	4.70621e-19	1.49724	0.538	0.404	1.11471e-14	GPR68	2.10402e-24	0.785429	0.108	0.046	4.98358e-20	CDH23	8.74e-12	-1.10937	0.563	0.672	2.07e-07
SYT1	1.35269e-17	0.742296	0.232	0.135	3.20399e-13	ANGPTL4	1.0131e-10	-2.61064	0.029	0.106	2.39962e-06	PRKACB	5.08287e-19	0.997315	0.715	0.659	1.20393e-14	AFAP1	2.21871e-24	0.662493	0.547	0.47	5.25524e-20	NRP1	9.81e-12	-0.866622	0.148	0.258	2.32e-07
MYBL2	1.3995e-17	-0.577707	0.087	0.167	3.31486e-13	DPP6	1.01768e-10	0.845139	0.601	0.5	2.41047e-06	TM4SF1	5.12607e-19	1.18744	0.443	0.293	1.21416e-14	MSRA	2.41763e-24	0.794812	0.386	0.291	5.7264e-20	NDRG4	9.99e-12	-0.598658	0.538	0.642	2.37e-07
ST6GAL2	1.42947e-17	1.08714	0.553	0.47	3.38585e-13	PCDH15	1.06849e-10	0.78599	0.627	0.512	2.53083e-06	CARD16	5.16231e-19	-1.68048	0.006	0.066	1.22274e-14	LSAMP	2.4866e-24	0.954155	0.308	0.218	5.88977e-20	AIFM2	1.03e-11	-0.869677	0.35	0.49	2.45e-07
UBE2E3	1.44076e-17	0.574279	0.609	0.523	3.41259e-13	TPD52L1	1.08109e-10	0.642458	0.041	0.129	2.56067e-06	PPFIA2	5.1648e-19	0.773854	0.539	0.39	1.22333e-14	ARHGEF7	3.38056e-24	0.762761	0.573	0.514	8.0072e-20	FAM171B	1.04e-11	0.521091	0.484	0.355	2.46e-07
GBE1	1.66877e-17	-0.933443	0.375	0.489	3.95264e-13	PPAPDC1A	1.11402e-10	0.996189	0.296	0.174	2.63867e-06	ARHGAP33	5.20484e-19	0.672116	0.655	0.523	1.23282e-14	SAMD14	4.33777e-24	0.733111	0.19	0.109	1.02745e-19	RCBTB1	1.14e-11	0.633504	0.445	0.321	2.7e-07
GTSE1	1.7571e-17	-0.521136	0.151	0.242	4.16187e-13	ID1	1.16456e-10	-0.698215	0.192	0.323	2.75837e-06	IGFBP4	5.29168e-19	-0.944318	0.073	0.185	1.25339e-14	CALCOCO1	4.37369e-24	0.678989	0.619	0.57	1.03595e-19	EFR3B	1.27e-11	-0.574305	0.62	0.724	3.01e-07
TCEAL6	1.7876e-17	0.916464	0.116	0.047	4.23412e-13	LOC440040	1.29452e-10	-1.60428	0.147	0.254	3.06619e-06	RGCC	5.42129e-19	1.09258	0.271	0.133	1.28409e-14	ZMIZ1	4.55338e-24	0.503068	0.73	0.695	1.07851e-19	CACHD1	1.28e-11	-0.837308	0.175	0.286	3.03e-07
CTNND2	2.02631e-17	0.52273	0.62	0.517	4.79951e-13	PRAME	1.33975e-10	0.54079	0.273	0.148	3.17332e-06	GNPTAB	5.53333e-19	0.813647	0.69	0.59	1.31062e-14	PALLD	4.76731e-24	0.805828	0.29	0.194	1.12918e-19	TIPARP	1.3e-11	-0.637618	0.07	0.155	3.07e-07
TTC9B	2.0786e-17	0.9022	0.138	0.065	4.92338e-13	AGPAT2	1.36785e-10	-0.840107	0.033	0.113	3.23988e-06	PCP4L1	5.60968e-19	1.50605	0.163	0.055	1.32871e-14	FSD1	7.52835e-24	1.09373	0.182	0.104	1.78317e-19	DDX11	1.49e-11	0.825393	0.311	0.186	3.52e-07
PCSK1	2.40016e-17	-0.576621	0.072	0.146	5.68502e-13	TMEM63A	1.4088e-10	-0.500952	0.071	0.17	3.33689e-06	CXCL12	6.05458e-19	1.15564	0.249	0.118	1.43409e-14	FABP6	7.77634e-24	-0.716968	0.008	0.052	1.8419e-19	SLC16A14	1.61e-11	0.820712	0.25	0.134	3.82e-07
CASP4	2.53971e-17	-0.639211	0.068	0.141	6.01555e-13	BNIP3	1.44737e-10	-0.93845	0.498	0.649	3.42824e-06	EGFR	6.1012e-19	1.2538	0.472	0.329	1.44513e-14	SBSPON	7.97719e-24	0.532201	0.532	0.456	1.88948e-19	FAM65B	1.7e-11	-0.621704	0.204	0.322	4.02e-07
ERBB4	2.58384e-17	0.674069	0.272	0.175	6.12009e-13	FGD3	1.45828e-10	0.731963	0.197	0.095	3.45409e-06	TUBA1B	6.67591e-19	-0.555638	0.921	0.947	1.58126e-14	CLASP1	8.69587e-24	0.73008	0.638	0.605	2.0597e-19	LNX1	1.71e-11	1.57354	0.195	0.092	4.06e-07
GRM5	2.67106e-17	0.506818	0.078	0.023	6.32667e-13	TRIM38	1.5563e-10	-0.564459	0.166	0.276	3.68626e-06	RGN	6.71985e-19	0.779793	0.189	0.07	1.59166e-14	ADRBK2	8.76433e-24	0.563162	0.714	0.677	2.07592e-19	UGDH	1.74e-11	0.5972	0.761	0.735	4.13e-07
EHD3	2.93603e-17	0.949123	0.248	0.155	6.95428e-13	SPESP1	1.56425e-10	-1.10019	0	0.047	3.70508e-06	DIRC3	6.8369e-19	0.507627	0.145	0.043	1.61939e-14	DSEL	8.90954e-24	0.595811	0.583	0.522	2.11031e-19	CNGA3	1.88e-11	-0.558823	0.017	0.07	4.46e-07
BIN1	3.25951e-17	0.642941	0.29	0.189	7.72049e-13	FAM162A	1.56478e-10	-0.716264	0.277	0.423	3.70633e-06	MYO1E	7.37663e-19	-0.534062	0.093	0.212	1.74723e-14	PLXNC1	9.91631e-24	0.951949	0.2	0.118	2.34878e-19	HES1	1.95e-11	-0.591628	0.025	0.084	4.62e-07
CDK16	3.50774e-17	-0.656478	0.558	0.67	8.30843e-13	SLC22A18	1.58467e-10	-0.962572	0.024	0.097	3.75345e-06	DDAH1	1.00409e-18	0.833838	0.568	0.439	2.37828e-14	EMB	9.93423e-24	-0.510858	0.08	0.161	2.35302e-19	TF	2.04e-11	-1.14799	0.444	0.534	4.83e-07
ANGEL1	3.67902e-17	0.805575	0.489	0.407	8.71412e-13	CRTAC1	1.58581e-10	-0.966616	0.043	0.127	3.75614e-06	EPN2-AS1	1.02436e-18	1.2036	0.212	0.092	2.4263e-14	GDAP1L1	9.95353e-24	0.813212	0.426	0.34	2.35759e-19	SLC10A1	2.16e-11	-0.511381	0.033	0.097	5.12e-07
SPOCK1	3.71618e-17	0.914107	0.261	0.163	8.80214e-13	CYGB	1.71167e-10	-0.734301	0.021	0.091	4.05425e-06	SULF1	1.06563e-18	-0.906213	0.128	0.258	2.52405e-14	IFT57	1.08208e-23	-0.582842	0.396	0.505	2.56301e-19	LGI4	2.37e-11	-0.884751	0.043	0.113	5.62e-07
DLX6	3.72566e-17	0.964556	0.129	0.057	8.8246e-13	IPO9	1.74976e-10	0.506668	0.986	0.97	4.14448e-06	GABRB3	1.09208e-18	0.9555	0.481	0.337	2.58669e-14	SCG2	1.23631e-23	1.57435	0.196	0.117	2.92832e-19	ANXA7	2.42e-11	-0.508717	0.441	0.57	5.72e-07
NTN4	3.74603e-17	1.1447	0.084	0.027	8.87286e-13	TTC9B	1.85937e-10	0.677273	0.147	0.059	4.40409e-06	RGS14	1.15267e-18	-0.681394	0.04	0.132	2.7302e-14	COL21A1	1.34825e-23	1.32473	0.073	0.024	3.19347e-19	IFI35	2.6e-11	-0.726803	0.096	0.19	6.16e-07
RASL11B	3.95455e-17	1.69692	0.156	0.079	9.36675e-13	NR1D1	1.98425e-10	-1.00264	0.09	0.196	4.6999e-06	LIMCH1	1.34309e-18	-0.923467	0.326	0.486	3.18125e-14	FAM127A	1.47129e-23	0.655107	0.69	0.683	3.4849e-19	PIPOX	2.69e-11	-1.12898	0.291	0.426	6.36e-07
HSPA5	4.43728e-17	-0.656893	0.831	0.9	1.05101e-12	SYT4	2.18422e-10	0.603572	0.266	0.145	5.17354e-06	C1orf204	1.79247e-18	1.14874	0.144	0.043	4.24565e-14	FAT4	1.62563e-23	0.655311	0.29	0.198	3.85047e-19	NEU1	2.76e-11	-0.627569	0.326	0.455	6.53e-07
KLHL35	4.76972e-17	0.815042	0.117	0.049	1.12976e-12	PBX1	2.21551e-10	0.684504	0.524	0.416	5.24766e-06	GRM5-AS1	1.81792e-18	1.00908	0.106	0.021	4.30593e-14	NPC2	2.0638e-23	-0.647507	0.081	0.163	4.88831e-19	SLC29A2	2.84e-11	-0.761068	0.153	0.261	6.74e-07
RAB31	4.9681e-17	0.505245	0.803	0.771	1.17674e-12	ZNF711	2.38376e-10	0.98252	0.634	0.582	5.64618e-06	ELF1	2.00659e-18	-0.531527	0.17	0.312	4.75281e-14	PVRIG	2.07893e-23	0.733612	0.322	0.233	4.92416e-19	STEAP3	2.87e-11	-1.05208	0.025	0.083	6.79e-07
SERPINA3	4.97144e-17	-1.11409	0.107	0.191	1.17753e-12	ERP27	2.38741e-10	-0.941477	0.021	0.09	5.65483e-06	FAM212B	2.15083e-18	0.784358	0.581	0.46	5.09446e-14	MELK	3.26128e-23	-0.700693	0.169	0.257	7.72467e-19	AQP4	3.03e-11	-1.5744	0.028	0.089	7.17e-07
DDB2	5.01278e-17	-0.568255	0.295	0.407	1.18733e-12	TFPT	2.39366e-10	-0.615309	0.2	0.326	5.66962e-06	ZFR2	2.29859e-18	1.70479	0.265	0.142	5.44444e-14	PSMB8	3.61407e-23	-0.65153	0.027	0.085	8.5603e-19	GAD1	3.12e-11	0.585829	0.52	0.398	7.38e-07
MGARP	5.1742e-17	-0.566772	0.055	0.123	1.22556e-12	CAPN5	2.41447e-10	0.74807	0.69	0.641	5.71891e-06	TYMS	2.41531e-18	-0.556962	0.252	0.411	5.72089e-14	CTTNBP2	3.83057e-23	0.561757	0.198	0.115	9.0731e-19	LOC441081	3.28e-11	0.536391	0.72	0.621	7.76e-07
POU4F1	5.84094e-17	0.970675	0.108	0.042	1.38348e-12	STMN2	2.76814e-10	0.79358	0.301	0.181	6.55662e-06	CXCR7	2.67544e-18	-0.966313	0.074	0.185	6.33705e-14	ARRDC3	4.46212e-23	0.804609	0.725	0.732	1.0569e-18	ARID2	3.32e-11	0.515559	0.59	0.473	7.86e-07
DOK5	6.0068e-17	-0.600187	0.183	0.283	1.42277e-12	LRRC17	2.7731e-10	-1.01845	0.033	0.11	6.56836e-06	S100A16	3.05469e-18	-1.02174	0.231	0.367	7.23535e-14	GLCE	5.259e-23	0.730205	0.597	0.523	1.24565e-18	CEND1	3.83e-11	-0.639887	0.4	0.515	9.08e-07
NCALD	6.06095e-17	0.746906	0.394	0.297	1.4356e-12	ARHGAP4	2.78892e-10	-1.50758	0.084	0.181	6.60583e-06	FAM129A	3.07365e-18	-1.09213	0.224	0.349	7.28026e-14	SEMA4F	5.85365e-23	0.876855	0.657	0.619	1.3865e-18	RGL3	4.63e-11	-0.791919	0.03	0.092	1.1e-06
BAZ2B	6.1067e-17	0.594493	0.853	0.814	1.44643e-12	DGKB	2.8646e-10	0.544417	0.843	0.79	6.7851e-06	AP4S1	3.16996e-18	0.706224	0.794	0.767	7.50836e-14	SOSTDC1	7.69017e-23	1.09212	0.148	0.077	1.82149e-18	KCNJ6	5.33e-11	-0.669835	0.053	0.128	1.26e-06
ZNF385A	6.61856e-17	-0.637462	0.077	0.15	1.56767e-12	HIPK2	2.94655e-10	0.50992	0.848	0.867	6.9792e-06	BMP2	3.21421e-18	0.87163	0.237	0.111	7.61318e-14	MYOD1	8.66401e-23	-0.797262	0.009	0.052	2.05216e-18	CDK18	5.36e-11	-0.606949	0.029	0.089	1.27e-06
BACE2	6.70381e-17	-0.556201	0.049	0.114	1.58786e-12	PPAP2A	3.0442e-10	-0.722658	0.189	0.31	7.2105e-06	PGAP1	3.29661e-18	0.886811	0.702	0.612	7.80836e-14	C14orf23	8.76869e-23	0.601399	0.769	0.75	2.07695e-18	NDN	5.58e-11	0.864232	0.193	0.09	1.32e-06
ARHGEF9	7.05448e-17	0.519359	0.536	0.437	1.67092e-12	IGFBP6	3.2095e-10	-1.34772	0.019	0.085	7.60203e-06	USP43	3.68769e-18	0.75575	0.259	0.122	8.73467e-14	CPM	9.71977e-23	0.661994	0.722	0.704	2.30222e-18	NKAIN3	5.69e-11	-0.785441	0.189	0.298	1.35e-06
TSPAN11	7.11781e-17	0.507348	0.372	0.264	1.68593e-12	ANKS1B	3.27816e-10	0.848828	0.465	0.352	7.76465e-06	DLG3	3.92956e-18	0.893757	0.26	0.131	9.30756e-14	ZNF737	1.05577e-22	0.516301	0.885	0.852	2.5007e-18	PLA2G16	5.72e-11	-1.60136	0.009	0.051	1.36e-06
PELI1	7.56375e-17	0.828669	0.387	0.286	1.79155e-12	TUBB3	3.34504e-10	0.512795	0.826	0.786	7.92305e-06	TSPAN13	4.08751e-18	0.89048	0.521	0.402	9.68167e-14	FRMD4A	1.1064e-22	1.04546	0.297	0.214	2.62062e-18	GPC4	5.77e-11	-0.865308	0.028	0.088	1.37e-06
MOB3B	7.71513e-17	0.796961	0.482	0.392	1.8274e-12	ACP6	3.34519e-10	-0.571369	0.182	0.314	7.92341e-06	MMD2	4.27252e-18	0.887768	0.47	0.342	1.01199e-13	SYNE1	1.17682e-22	0.752951	0.361	0.272	2.78741e-18	KIF6	5.84e-11	-0.527915	0.012	0.057	1.38e-06
PCGF5	7.95103e-17	-0.603766	0.692	0.763	1.88328e-12	GBA2	3.61964e-10	-0.571698	0.374	0.512	8.57348e-06	MGP	4.36045e-18	-3.60047	0.012	0.077	1.03282e-13	PXDN	1.29724e-22	0.808562	0.371	0.281	3.07264e-18	PCDHB9	5.89e-11	0.732169	0.821	0.816	1.4e-06
MEX3B	8.38835e-17	0.742914	0.137	0.063	1.98686e-12	CMTM7	3.84143e-10	-0.711867	0.027	0.099	9.09882e-06	ELAVL4	4.56642e-18	1.12193	0.374	0.234	1.0816e-13	HS3ST5	1.29824e-22	1.37023	0.081	0.03	3.07502e-18	OSBPL6	6.21e-11	-0.525746	0.293	0.422	1.47e-06
EDIL3	8.5773e-17	1.06432	0.084	0.027	2.03162e-12	GPRC5A	3.92629e-10	-1.27422	0.009	0.066	9.29981e-06	FLG	4.65995e-18	0.591971	0.33	0.19	1.10376e-13	CDCA2	1.40874e-22	-0.517217	0.046	0.111	3.33674e-18	CERKL	6.26e-11	-0.876544	0.099	0.192	1.48e-06
IFITM10	8.98938e-17	0.635252	0.181	0.097	2.12923e-12	SLC27A6	3.98989e-10	-0.889167	0.001	0.048	9.45045e-06	SELL	4.7931e-18	-1.42177	0.005	0.062	1.13529e-13	HSBP1L1	1.44194e-22	-0.518988	0.029	0.087	3.41539e-18	ZNF254	6.54e-11	0.596507	0.53	0.416	1.55e-06
C2orf27A	9.58314e-17	1.00032	0.193	0.109	2.26986e-12	GSTT2B	4.37071e-10	-0.52595	0.092	0.195	1.03525e-05	HSPA12A	4.82418e-18	-0.699516	0.199	0.341	1.14266e-13	SV2A	1.79176e-22	0.591155	0.36	0.263	4.24397e-18	KIAA1377	6.65e-11	0.573136	0.645	0.599	1.57e-06
ATP2B4	9.60631e-17	0.806907	0.652	0.584	2.27535e-12	RSPO2	4.39678e-10	-1.00854	0.012	0.07	1.04142e-05	CD82	4.90387e-18	1.44356	0.663	0.603	1.16153e-13	CISH	2.12115e-22	-0.540125	0.037	0.098	5.02415e-18	LMO3	6.75e-11	0.576822	0.31	0.188	1.6e-06
PIM2	1.01124e-16	-0.539406	0.134	0.223	2.39523e-12	TMEM255A	4.52775e-10	0.607729	0.432	0.308	1.07244e-05	2021-03-01	5.11308e-18	0.581189	0.358	0.21	1.21108e-13	MT1X	2.34972e-22	-0.92406	0.102	0.187	5.56554e-18	MTHFS	7.1e-11	-0.841343	0.098	0.188	1.68e-06
GPD1	1.17887e-16	0.722622	0.143	0.068	2.79226e-12	C17orf72	4.91355e-10	-0.5058	0.01	0.068	1.16382e-05	MPV17L	5.74478e-18	0.757918	0.6	0.499	1.36071e-13	CELF2	2.55723e-22	0.779614	0.537	0.467	6.05705e-18	CCDC163P	7.15e-11	-1.22147	0.34	0.464	1.69e-06
HOXA2	1.18341e-16	0.916096	0.146	0.071	2.80303e-12	RC3H1	5.19486e-10	0.645334	0.875	0.894	1.23045e-05	RERE	6.23372e-18	0.649978	0.711	0.632	1.47652e-13	PVT1	2.67078e-22	-0.669536	0.149	0.24	6.32601e-18	PTBP3	7.18e-11	0.669904	0.216	0.108	1.7e-06
ARPP21	1.27076e-16	0.589898	0.23	0.138	3.00991e-12	PTHLH	5.51591e-10	-1.75511	0.016	0.08	1.3065e-05	MAP3K1	6.84285e-18	0.982329	0.514	0.387	1.6208e-13	UCHL1	2.69541e-22	1.50836	0.442	0.397	6.38436e-18	TGFBI	7.26e-11	-1.24581	0.005	0.041	1.72e-06
RAD51AP1	1.28845e-16	-0.644707	0.162	0.257	3.05182e-12	PDE4B	6.11116e-10	0.898363	0.802	0.828	1.44749e-05	FRY	7.62935e-18	0.748408	0.562	0.44	1.80709e-13	IFITM2	2.80936e-22	-1.48858	0.018	0.067	6.65424e-18	ABHD14B	7.29e-11	-0.879127	0.103	0.196	1.73e-06
FST	1.36899e-16	-0.623926	0.033	0.089	3.24259e-12	ANXA3	6.47311e-10	-1.03405	0.001	0.047	1.53322e-05	FDFT1	7.91371e-18	-0.529255	0.658	0.779	1.87444e-13	NRL	3.07243e-22	-0.814009	0.058	0.128	7.27737e-18	SPRY3	7.74e-11	0.528317	0.192	0.092	1.83e-06
IQGAP3	1.46742e-16	-0.656031	0.099	0.178	3.47574e-12	GNG4	6.69526e-10	0.828913	0.927	0.894	1.58584e-05	SNCG	9.00314e-18	-1.35276	0.006	0.063	2.13248e-13	VPS13C	3.72344e-22	0.5695	0.743	0.706	8.81935e-18	KDM2B	7.8e-11	0.507005	0.321	0.198	1.85e-06
NDRG4	1.52731e-16	0.512478	0.609	0.517	3.61759e-12	SLC4A10	7.14851e-10	0.585065	0.122	0.045	1.6932e-05	SEMA3C	9.08616e-18	-1.05195	0.028	0.108	2.15215e-13	BGN	5.31465e-22	-0.846233	0.125	0.211	1.25883e-17	ANAPC16	8.52e-11	-0.561902	0.907	0.929	2.02e-06
ANXA4	1.58126e-16	-0.521666	0.125	0.215	3.74536e-12	KLHL21	7.22973e-10	-0.5399	0.171	0.301	1.71243e-05	SHC4	9.31028e-18	0.729682	0.187	0.074	2.20523e-13	RRM2B	5.94749e-22	-0.547739	0.121	0.208	1.40872e-17	NEUROD1	8.54e-11	-0.63237	0.167	0.276	2.02e-06
ZFP69B	2.17855e-16	0.730465	0.189	0.104	5.1601e-12	MND1	7.31888e-10	-0.691149	0.12	0.229	1.73355e-05	NTNG1	9.45494e-18	1.50684	0.219	0.101	2.2395e-13	ARL4D	5.96155e-22	-0.758526	0.391	0.526	1.41205e-17	KIF5A	9.22e-11	0.592499	0.339	0.212	2.18e-06
KIAA0408	2.65418e-16	0.843777	0.601	0.551	6.28668e-12	GDF5	7.7062e-10	-1.74221	0.01	0.067	1.82529e-05	ST8SIA3	9.57272e-18	0.743574	0.237	0.112	2.26739e-13	DUSP2	6.57888e-22	-0.659149	0.057	0.127	1.55827e-17	POMP	1.1e-10	-0.514129	0.707	0.779	2.6e-06
DPCD	2.80532e-16	-0.507226	0.13	0.219	6.64467e-12	CELSR2	7.71788e-10	0.560519	0.677	0.629	1.82806e-05	ACAT2	9.57609e-18	-0.527052	0.409	0.558	2.26819e-13	SYT4	6.67238e-22	1.01352	0.611	0.569	1.58042e-17	KCNK4	1.15e-10	-0.546309	0.072	0.154	2.72e-06
USP9Y	3.00041e-16	0.506988	0.295	0.195	7.10676e-12	GLCCI1	7.98762e-10	0.832996	0.555	0.46	1.89195e-05	PRKD1	9.6009e-18	1.12361	0.295	0.162	2.27407e-13	ZIC5	6.69014e-22	0.741921	0.355	0.266	1.58463e-17	HMGCR	1.21e-10	0.524198	0.667	0.578	2.88e-06
C12orf57	3.26799e-16	-0.514959	0.742	0.822	7.74056e-12	SEMA3D	8.08085e-10	-0.569271	0.047	0.128	1.91403e-05	ATP13A4	9.65598e-18	0.93124	0.239	0.113	2.28712e-13	SOX9	6.77443e-22	0.752652	0.352	0.264	1.60459e-17	CDC42EP1	1.32e-10	-0.512903	0.24	0.359	3.11e-06
ECE1	3.32668e-16	-0.526864	0.621	0.705	7.87957e-12	TMEFF2	8.55088e-10	1.07227	0.388	0.268	2.02536e-05	EFHD1	1.08223e-17	-0.508415	0.048	0.143	2.56336e-13	PDZRN3	7.00408e-22	1.45244	0.134	0.069	1.65899e-17	HMOX1	1.34e-10	-1.56845	0.013	0.057	3.18e-06
CHRNA1	3.88239e-16	-0.907847	0.066	0.135	9.19583e-12	HIST3H2A	9.10303e-10	0.971677	0.401	0.306	2.15614e-05	2021-09-03	1.10259e-17	0.776668	0.614	0.499	2.61158e-13	RASGEF1C	7.00781e-22	0.894428	0.119	0.058	1.65987e-17	CD9	1.35e-10	-0.747387	0.246	0.363	3.2e-06
RGS10	3.89641e-16	-0.630361	0.007	0.041	9.22904e-12	SPP1	9.60976e-10	-0.606748	0.214	0.343	2.27617e-05	SLC22A18	1.32322e-17	-0.505891	0.046	0.14	3.13417e-13	PHTF1	7.44618e-22	0.740443	0.378	0.291	1.7637e-17	CHAC2	1.37e-10	-1.18211	0.046	0.115	3.25e-06
IL13RA2	5.2028e-16	-0.656822	0.114	0.197	1.23234e-11	TGIF2-C20orf24	9.79759e-10	-1.03015	0.055	0.141	2.32066e-05	CASK	1.33008e-17	0.79516	0.607	0.486	3.15042e-13	SLITRK2	1.18538e-21	1.21738	0.059	0.018	2.8077e-17	IFIT2	1.39e-10	-0.843986	0.279	0.392	3.3e-06
LY6H	5.97602e-16	0.980129	0.071	0.02	1.41548e-11	MDH1B	1.01907e-09	-0.596055	0.019	0.083	2.41378e-05	MZT1	1.36555e-17	-0.559445	0.187	0.326	3.23443e-13	B4GALNT4	1.34011e-21	0.681845	0.303	0.219	3.17419e-17	SRGAP2	1.4e-10	0.508158	0.484	0.356	3.33e-06
SPAG4	7.83899e-16	-0.686311	0.015	0.057	1.85674e-11	SLC17A3	1.03687e-09	-0.870547	0.001	0.046	2.45593e-05	ZMAT1	1.39292e-17	0.893246	0.517	0.383	3.29927e-13	AGAP2	1.35323e-21	0.574036	0.17	0.098	3.20527e-17	DUSP1	1.48e-10	-0.689366	0.54	0.654	3.51e-06
GDPD1	7.85361e-16	0.590491	0.918	0.905	1.86021e-11	TGM2	1.07275e-09	-2.31501	0.017	0.08	2.54092e-05	PLEKHH2	1.51076e-17	1.20221	0.587	0.48	3.57838e-13	FAM180A	1.36074e-21	-0.587899	0.004	0.04	3.22305e-17	GRSF1	1.53e-10	0.593843	0.677	0.622	3.62e-06
MLF2	1.02515e-15	-0.51228	0.918	0.953	2.42817e-11	PLAUR	1.07971e-09	-0.795916	0.075	0.167	2.5574e-05	PDGFD	1.58629e-17	-1.22475	0.019	0.091	3.75728e-13	DOK4	1.60228e-21	1.01512	0.113	0.053	3.79515e-17	NR1H2	1.56e-10	-0.705781	0.134	0.237	3.7e-06
TERF2IP	1.07771e-15	0.538122	0.692	0.625	2.55267e-11	SLFN12	1.0839e-09	-0.502704	0.013	0.071	2.56732e-05	RBM5	1.62994e-17	0.732751	0.792	0.756	3.86067e-13	ADAMTS6	2.69515e-21	0.621668	0.118	0.057	6.38373e-17	DNAJC30	1.58e-10	-0.582276	0.31	0.447	3.74e-06
CENPM	1.13152e-15	-0.66531	0.122	0.204	2.68013e-11	ZNF713	1.23396e-09	0.545738	0.751	0.698	2.92275e-05	ITPKB	1.93324e-17	-0.826659	0.154	0.28	4.57907e-13	LOXL4	3.09417e-21	-0.528191	0.036	0.094	7.32885e-17	PSMG3	1.7e-10	-0.543402	0.407	0.532	4.03e-06
NFIB	1.1978e-15	0.586102	0.899	0.857	2.83712e-11	B3GAT1	1.24482e-09	0.668508	0.529	0.409	2.94847e-05	HRNR	2.1748e-17	0.513399	0.414	0.27	5.15123e-13	TSPYL1	3.26818e-21	0.56576	0.884	0.901	7.74101e-17	HINT2	1.84e-10	-0.615524	0.344	0.475	4.35e-06
DEPDC1	1.26813e-15	-0.506594	0.074	0.145	3.00369e-11	C4B	1.40086e-09	-0.615809	0.111	0.222	3.31808e-05	GNAO1	2.26928e-17	0.637257	0.631	0.508	5.37503e-13	PYY	3.47761e-21	-0.51356	0.015	0.06	8.23706e-17	ZNF676	1.88e-10	1.06321	0.242	0.137	4.46e-06
TMEM246	1.38649e-15	1.33227	0.087	0.031	3.28403e-11	LGI4	1.42431e-09	-0.655005	0.163	0.285	3.37363e-05	TCEAL5	2.35379e-17	1.05164	0.291	0.159	5.57519e-13	C6orf123	4.73206e-21	0.634278	0.478	0.414	1.12083e-16	ACOT2	2.11e-10	-0.50642	0.261	0.383	5e-06
PFKP	1.42592e-15	-0.706192	0.419	0.53	3.37743e-11	C5AR1	1.53858e-09	-0.758335	0.111	0.206	3.64429e-05	TRPM3	3.38056e-17	-1.09964	0.043	0.132	8.0072e-13	KLHL24	5.41781e-21	0.615889	0.718	0.675	1.28326e-16	ADA	2.26e-10	0.726563	0.249	0.137	5.36e-06
C18orf56	1.46775e-15	-0.624917	0.054	0.117	3.47652e-11	APOD	1.61618e-09	0.675734	0.46	0.366	3.82809e-05	EPM2AIP1	3.38426e-17	0.708971	0.683	0.603	8.01595e-13	KALRN	5.90751e-21	0.622685	0.523	0.445	1.39925e-16	AKR1A1	2.27e-10	-0.715999	0.399	0.504	5.37e-06
MYBPH	1.46827e-15	-1.28348	0.016	0.057	3.47773e-11	NUDT8	1.66762e-09	-0.612693	0.017	0.08	3.94993e-05	ESRP1	4.53691e-17	-1.47199	0.01	0.07	1.07461e-12	FOXO3B	6.39052e-21	0.775474	0.477	0.412	1.51366e-16	CNTN3	2.49e-10	0.755588	0.151	0.062	5.89e-06
SH3D19	1.53136e-15	0.644603	0.366	0.269	3.62718e-11	PAK7	1.76161e-09	0.84847	0.2	0.104	4.17255e-05	SLC6A1-AS1	4.71316e-17	0.634204	0.151	0.051	1.11636e-12	ABTB2	6.67725e-21	0.961719	0.199	0.124	1.58157e-16	PCDHB2	2.49e-10	0.778036	0.279	0.167	5.89e-06
KCNH7	1.75435e-15	0.977089	0.261	0.17	4.15536e-11	MT3	1.774e-09	-0.592689	0.311	0.454	4.2019e-05	CYP1B1	4.74665e-17	-3.15637	0.013	0.076	1.12429e-12	DAGLA	6.96165e-21	0.736449	0.16	0.09	1.64894e-16	DANCR	2.84e-10	-0.529939	0.548	0.642	6.73e-06
SPOCK2	1.90156e-15	-0.721348	0.146	0.23	4.50404e-11	CDC42	1.93443e-09	0.606184	0.952	0.982	4.5819e-05	UNC13A	5.07471e-17	0.587526	0.35	0.222	1.202e-12	GPR88	7.18017e-21	1.75543	0.078	0.03	1.70069e-16	CKS2	2.93e-10	-0.624749	0.114	0.209	6.95e-06
IGSF9B	1.94015e-15	0.639265	0.33	0.232	4.59543e-11	GPR37	1.96475e-09	-0.62382	0.026	0.093	4.65372e-05	C11orf96	5.21866e-17	0.748411	0.212	0.096	1.23609e-12	ST6GAL2	7.88357e-21	0.684122	0.532	0.459	1.8673e-16	ERBB3	3.04e-10	0.847814	0.403	0.314	7.19e-06
C9orf116	1.98536e-15	-0.708087	0.034	0.087	4.70252e-11	AKAP9	2.05704e-09	0.603491	0.754	0.752	4.8723e-05	CYFIP2	5.49685e-17	0.580706	0.77	0.699	1.30198e-12	SLC22A16	8.80887e-21	-0.7456	0.005	0.041	2.08647e-16	CD44	3.15e-10	-0.533674	0.006	0.042	7.45e-06
DLG2	2.00383e-15	0.906298	0.339	0.246	4.74626e-11	TLE3	2.19231e-09	0.611582	0.695	0.6	5.19269e-05	LBH	5.82248e-17	0.721477	0.546	0.404	1.37911e-12	NPDC1	9.23376e-21	0.758619	0.53	0.485	2.18711e-16	CBLB	3.16e-10	0.647387	0.402	0.28	7.48e-06
GJB2	2.01654e-15	-1.66423	0.012	0.049	4.77637e-11	HEY1	2.26722e-09	-0.57429	0.267	0.402	5.37015e-05	GSTM1	6.20526e-17	-0.560947	0.271	0.423	1.46978e-12	CNPY1	1.12928e-20	0.779406	0.232	0.152	2.67482e-16	EGLN3	3.25e-10	-0.74473	0.14	0.242	7.7e-06
TRAF3IP2-AS1	2.18817e-15	0.650145	0.817	0.781	5.1829e-11	AES	2.39377e-09	-0.760494	0.625	0.758	5.66987e-05	KCNMB2	6.39598e-17	0.803056	0.125	0.034	1.51495e-12	SYCP1	1.22791e-20	-0.6523	0.019	0.066	2.90842e-16	PLEKHF1	3.48e-10	-1.61052	0.01	0.051	8.24e-06
ANG	2.47139e-15	-0.818437	0.026	0.074	5.85374e-11	RRAS	2.39985e-09	-1.01256	0.008	0.06	5.68429e-05	PATZ1	6.46366e-17	0.596942	0.44	0.29	1.53098e-12	MRAP2	1.33086e-20	0.922478	0.132	0.068	3.15227e-16	IGSF3	3.54e-10	-0.666316	0.033	0.092	8.37e-06
TRIM24	2.49416e-15	0.529194	0.669	0.579	5.90767e-11	GPD1	2.58049e-09	1.93933	0.097	0.03	6.11216e-05	RIT2	7.13864e-17	1.38701	0.141	0.045	1.69086e-12	SRGAP3	1.42663e-20	0.67224	0.561	0.51	3.37912e-16	ZDHHC2	4.03e-10	0.567317	0.318	0.202	9.54e-06
TMCC1	2.56027e-15	0.717021	0.515	0.432	6.06426e-11	PFKFB4	2.61791e-09	-0.71521	0.14	0.247	6.20077e-05	FGF12	7.96213e-17	0.550221	0.678	0.542	1.88591e-12	EGFEM1P	1.66446e-20	1.04504	0.501	0.441	3.94245e-16	AIF1L	4.13e-10	0.607254	0.351	0.229	9.78e-06
LEF1	3.15022e-15	-0.535804	0.052	0.113	7.46161e-11	IGFBP3	2.712e-09	-1.99964	0.124	0.232	6.42364e-05	BMP7	8.29609e-17	0.969186	0.734	0.664	1.96501e-12	WFIKKN2	1.98856e-20	-1.39087	0.025	0.076	4.71009e-16	CDC42SE1	4.37e-10	0.504541	0.639	0.551	1.03e-05
S1PR1	3.5398e-15	-0.75666	0.02	0.064	8.38437e-11	ZNF267	2.81574e-09	-0.734459	0.153	0.262	6.66937e-05	RGS11	8.71557e-17	0.739872	0.329	0.195	2.06437e-12	IFITM1	2.04173e-20	-2.55747	0.006	0.042	4.83604e-16	IQCK	4.84e-10	-0.623986	0.605	0.691	1.15e-05
TMEM196	4.21553e-15	1.08515	0.077	0.025	9.98491e-11	KLF12	2.84838e-09	0.822909	0.668	0.646	6.74666e-05	GUCY1A2	8.88937e-17	0.578896	0.326	0.195	2.10554e-12	NRIP2	2.10458e-20	0.922597	0.42	0.347	4.9849e-16	GLRA3	4.92e-10	0.925753	0.105	0.032	1.17e-05
FAXC	4.78908e-15	0.500725	0.186	0.105	1.13434e-10	TENM1	2.98338e-09	0.582766	0.613	0.516	7.06643e-05	RUSC2	9.29012e-17	0.753454	0.507	0.385	2.20046e-12	MT1E	2.20858e-20	-1.1797	0.024	0.074	5.23124e-16	NOMO3	4.94e-10	0.61255	0.3	0.186	1.17e-05
ZMIZ1	4.99128e-15	0.625855	0.682	0.618	1.18223e-10	NFATC1	3.15625e-09	-0.616868	0.153	0.264	7.47589e-05	TNFRSF12A	9.60988e-17	-0.578185	0.057	0.154	2.2762e-12	MAP3K5	2.32591e-20	0.908319	0.092	0.04	5.50915e-16	TRIM7	5.28e-10	-0.809771	0.096	0.184	1.25e-05
HDAC2	4.99777e-15	0.51387	0.877	0.864	1.18377e-10	STAC	3.2839e-09	-0.708825	0.012	0.066	7.77824e-05	HYI	9.6577e-17	0.933407	0.293	0.164	2.28752e-12	OR2AT4	2.91603e-20	0.955464	0.039	0.008	6.9069e-16	LMCD1	5.85e-10	-0.868579	0.048	0.116	1.39e-05
PQBP1	5.17575e-15	-0.86646	0.45	0.555	1.22593e-10	UBTD1	3.38582e-09	-0.606815	0.045	0.124	8.01965e-05	ERC2	1.02028e-16	0.883767	0.35	0.22	2.41663e-12	PLXNA3	3.65421e-20	0.778687	0.405	0.334	8.65537e-16	USP38	6.15e-10	0.584757	0.303	0.188	1.46e-05
FAP	5.27556e-15	-0.644557	0.04	0.095	1.24957e-10	SMPD3	3.6539e-09	0.568913	0.224	0.123	8.65464e-05	SORCS3	1.09135e-16	0.607108	0.33	0.193	2.58496e-12	CDK5R1	5.04572e-20	0.722429	0.427	0.35	1.19513e-15	SEMA5B	6.77e-10	0.574368	0.422	0.293	1.6e-05
DDX25	5.70782e-15	0.608234	0.134	0.064	1.35196e-10	WFDC2	3.69353e-09	-0.914304	0.083	0.174	8.74848e-05	LPPR4	1.11853e-16	0.806877	0.212	0.096	2.64935e-12	CYGB	6.23868e-20	1.07093	0.052	0.015	1.47769e-15	ATP5L	6.99e-10	-0.535113	0.702	0.742	1.66e-05
CDC25C	6.84677e-15	-0.628634	0.045	0.102	1.62173e-10	PARS2	4.10322e-09	-0.559997	0.028	0.095	9.71889e-05	NLGN2	1.23869e-16	0.572338	0.675	0.594	2.93397e-12	DYNC1I2	7.25628e-20	0.633688	0.728	0.717	1.71872e-15	WNT5B	7.58e-10	-1.07319	0.006	0.041	1.8e-05
PIFO	7.19818e-15	-0.835446	0.031	0.082	1.70496e-10	ARPP21	4.54739e-09	1.1568	0.353	0.242	0.000107709	TUBGCP6	1.32486e-16	0.61137	0.654	0.588	3.13806e-12	GABRB1	8.30922e-20	0.94718	0.094	0.042	1.96812e-15	GLRA1	8.03e-10	-1.13959	0.017	0.064	1.9e-05
CCNO	7.24023e-15	-0.543313	0.016	0.056	1.71492e-10	OLFM2	4.58244e-09	1.07734	0.376	0.27	0.00010854	TVP23A	1.68369e-16	0.552134	0.443	0.331	3.98799e-12	KIAA1107	1.10513e-19	0.918313	0.283	0.203	2.61761e-15	HIST2H4A	8.24e-10	-0.667416	0.08	0.162	1.95e-05
HSPB8	7.86857e-15	-1.04552	0.041	0.096	1.86375e-10	KCNH7	4.64966e-09	0.875905	0.142	0.062	0.000110132	PLD1	1.74099e-16	-0.623354	0.057	0.152	4.1237e-12	POLE2	1.19656e-19	-0.513035	0.081	0.152	2.83418e-15	HIST2H4B	8.24e-10	-0.667416	0.08	0.162	1.95e-05
SOBP	9.17422e-15	0.502601	0.483	0.387	2.173e-10	SERPINA3	4.72612e-09	-1.54542	0.07	0.157	0.000111943	FARP2	1.79769e-16	1.12816	0.51	0.394	4.258e-12	DCTN1	1.53827e-19	0.674739	0.717	0.709	3.64355e-15	ZNF727	8.48e-10	0.903699	0.219	0.12	2.01e-05
MT1E	9.22848e-15	-0.882403	0.288	0.385	2.18586e-10	GABRA3	4.79339e-09	1.05751	0.269	0.169	0.000113536	PLA2G4A	1.82458e-16	-0.94335	0.091	0.2	4.32171e-12	TMEM244	1.58649e-19	-0.688089	0.042	0.1	3.75775e-15	FIBCD1	8.68e-10	-0.602308	0.007	0.042	2.06e-05
HILS1	9.67257e-15	0.826186	0.062	0.016	2.29105e-10	FGF17	4.83782e-09	-2.03922	0.012	0.065	0.000114588	ERBB3	1.83328e-16	0.561427	0.704	0.578	4.3423e-12	RGMA	1.60468e-19	0.616321	0.254	0.172	3.80084e-15	ZNF91	9.41e-10	0.528367	0.759	0.725	2.23e-05
RAB3A	1.01923e-14	0.545564	0.244	0.156	2.41414e-10	CCT6B	4.88006e-09	-0.670256	0.05	0.129	0.000115589	CHDH	1.84782e-16	0.949352	0.459	0.346	4.37675e-12	CSDC2	1.66598e-19	1.05695	0.101	0.048	3.94604e-15	ATP2B1	1.01e-09	0.52604	0.418	0.3	2.39e-05
PCDHA3	1.03672e-14	0.879244	0.165	0.089	2.45558e-10	FAM20C	5.42376e-09	-0.688121	0.15	0.26	0.000128467	HSD17B7	1.8654e-16	-0.605814	0.359	0.484	4.41838e-12	FAM210B	1.9764e-19	0.850327	0.623	0.583	4.68129e-15	CHST3	1.02e-09	0.71021	0.346	0.237	2.42e-05
AKAP12	1.04248e-14	-1.73805	0.387	0.468	2.46921e-10	ITM2A	5.85881e-09	1.06265	0.386	0.283	0.000138772	YLPM1	1.92914e-16	0.536743	0.668	0.568	4.56936e-12	PROX1	2.07734e-19	0.777155	0.296	0.213	4.92039e-15	GSE1	1.03e-09	0.531617	0.474	0.358	2.43e-05
ADSSL1	1.06741e-14	-0.924296	0.039	0.092	2.52828e-10	GSDMD	5.99913e-09	-0.896287	0.016	0.073	0.000142095	EMILIN3	1.97691e-16	0.98183	0.127	0.038	4.6825e-12	PROM1	2.12752e-19	-1.24545	0.063	0.127	5.03925e-15	SMAP2	1.05e-09	0.780406	0.141	0.057	2.49e-05
KIAA1107	1.08973e-14	0.689684	0.153	0.081	2.58114e-10	EGLN3	6.14057e-09	-0.718335	0.085	0.179	0.000145446	APITD1	2.24443e-16	-0.625939	0.09	0.199	5.31615e-12	CYP26A1	2.1822e-19	-2.62905	0.004	0.038	5.16877e-15	KANK1	1.08e-09	0.514957	0.69	0.612	2.55e-05
NAP1L5	1.09978e-14	0.990264	0.266	0.183	2.60494e-10	BCL7A	6.14366e-09	0.794934	0.563	0.46	0.000145519	PTPRN2	2.31435e-16	1.11384	0.415	0.292	5.48178e-12	KCTD17	2.38888e-19	0.815009	0.137	0.074	5.65829e-15	ZDHHC17	1.09e-09	0.630332	0.407	0.289	2.58e-05
GLCCI1	1.12959e-14	0.501575	0.576	0.485	2.67554e-10	CENPM	6.18509e-09	-0.572015	0.162	0.271	0.0001465	FCHSD2	2.57552e-16	0.748413	0.555	0.424	6.10038e-12	TFAP2A	2.49454e-19	0.766968	0.186	0.116	5.90857e-15	LHFPL3-AS1	1.09e-09	0.747803	0.251	0.146	2.59e-05
P4HA2	1.14552e-14	-0.84027	0.051	0.109	2.71327e-10	SMAGP	6.40474e-09	-0.867252	0.024	0.088	0.000151703	SERINC2	2.62806e-16	-0.52427	0.229	0.358	6.22483e-12	CTNND2	2.59573e-19	0.566538	0.329	0.241	6.14826e-15	ING1	1.13e-09	-0.749517	0.142	0.239	2.67e-05
BEX5	1.31654e-14	0.850744	0.092	0.035	3.11835e-10	KLHL14	6.50533e-09	-0.547409	0.055	0.135	0.000154085	DPY19L2P2	2.67823e-16	0.55154	0.864	0.835	6.34366e-12	RAB39B	2.67439e-19	0.941254	0.159	0.092	6.33457e-15	SLC4A2	1.33e-09	-0.593474	0.114	0.205	3.16e-05
PPIEL	1.34109e-14	0.501557	0.901	0.88	3.17651e-10	IL7	6.72951e-09	-0.584732	0.014	0.069	0.000159395	CCNB2	2.72658e-16	-0.632449	0.123	0.242	6.45819e-12	RAB3IP	2.70581e-19	0.803415	0.646	0.607	6.40899e-15	HSPA13	1.38e-09	0.637677	0.515	0.415	3.26e-05
GUSBP1	1.4341e-14	0.58586	0.59	0.509	3.39681e-10	SUSD5	6.79109e-09	0.800842	0.417	0.312	0.000160854	DLL1	3.03259e-16	0.604355	0.446	0.299	7.183e-12	HIP1R	2.74836e-19	0.724179	0.317	0.235	6.50976e-15	PCBD1	1.49e-09	-0.837084	0.127	0.218	3.52e-05
KLF7	1.51622e-14	0.563968	0.581	0.498	3.59132e-10	CTSK	6.82308e-09	-0.740889	0.174	0.283	0.000161611	ARMCX4	3.29947e-16	0.982369	0.317	0.19	7.81513e-12	OLFM3	2.78888e-19	0.856026	0.163	0.096	6.60574e-15	SCN3B	1.49e-09	-0.681073	0.689	0.752	3.54e-05
NAP1L3	1.53067e-14	0.646808	0.282	0.191	3.62554e-10	RANBP3L	6.87852e-09	-0.591136	0.015	0.071	0.000162925	CYBRD1	3.53793e-16	-0.775577	0.13	0.25	8.37993e-12	PCDH9	3.19625e-19	0.853772	0.426	0.351	7.57065e-15	ELOVL2	1.7e-09	-1.2974	0.02	0.067	4.04e-05
SEL1L3	1.54629e-14	0.820487	0.19	0.111	3.66255e-10	DNTTIP1	6.90582e-09	-0.500797	0.136	0.241	0.000163571	S1PR2	3.57451e-16	0.656018	0.877	0.844	8.46658e-12	SSX1	3.39334e-19	-2.24982	0.002	0.033	8.03747e-15	TNFRSF12A	1.88e-09	-0.87897	0.013	0.055	4.46e-05
ZNF300	1.57412e-14	0.68509	0.385	0.294	3.72847e-10	TDO2	7.05857e-09	-1.10853	0	0.038	0.000167189	LTBR	3.70773e-16	0.89287	0.08	0.012	8.78212e-12	MAP4K4	3.51186e-19	0.594837	0.705	0.681	8.3182e-15	MB	2.09e-09	-1.12088	0.013	0.053	4.96e-05
FOXN2	1.62374e-14	0.700444	0.552	0.465	3.84599e-10	NDP	7.50592e-09	-0.633079	0.073	0.163	0.000177785	PCDHGC5	3.72811e-16	1.00986	0.197	0.087	8.83039e-12	RND3	3.73998e-19	0.834017	0.412	0.335	8.85852e-15	ZNF208	2.15e-09	0.587385	0.43	0.345	5.1e-05
SYT3	1.67361e-14	0.541077	0.108	0.047	3.9641e-10	SLC20A1	7.61192e-09	-0.534698	0.548	0.701	0.000180296	SLC29A1	4.18109e-16	-0.563684	0.273	0.424	9.90333e-12	ZEB2	4.1725e-19	0.635072	0.645	0.622	9.88298e-15	NDE1	2.2e-09	-0.59316	0.109	0.198	5.22e-05
CLVS1	1.70972e-14	0.833527	0.199	0.12	4.04964e-10	PAMR1	7.74709e-09	-1.3846	0.015	0.07	0.000183498	FGF9	4.3432e-16	0.742922	0.226	0.11	1.02873e-11	HID1	4.21361e-19	0.944321	0.167	0.099	9.98036e-15	COL9A1	2.21e-09	0.725651	0.178	0.087	5.24e-05
BAALC	1.71209e-14	0.719788	0.562	0.473	4.05526e-10	WIPI1	8.11634e-09	-0.64022	0.044	0.119	0.000192244	TPCN1	4.52662e-16	-0.635518	0.167	0.294	1.07218e-11	IGFBP2	4.25815e-19	-0.50506	0.026	0.075	1.00859e-14	FAM107A	2.24e-09	-1.08086	0.038	0.097	5.3e-05
NAT16	1.74527e-14	0.537531	0.09	0.034	4.13385e-10	PAXBP1	8.54407e-09	0.723521	0.727	0.685	0.000202375	ZSWIM6	4.58838e-16	0.79268	0.387	0.253	1.0868e-11	NTN1	4.3825e-19	0.585385	0.089	0.039	1.03804e-14	AMZ2P1	2.4e-09	0.583268	0.216	0.117	5.68e-05
ARHGAP31	1.95355e-14	0.549299	0.482	0.389	4.62718e-10	GRIP2	8.68877e-09	0.769753	0.153	0.071	0.000205802	CCNL1	4.81383e-16	0.652805	0.706	0.638	1.1402e-11	C2orf48	4.54401e-19	-0.610527	0.013	0.054	1.07629e-14	LRRTM1	2.54e-09	0.582523	0.323	0.214	6.02e-05
EFEMP1	2.02554e-14	-0.811621	0.266	0.36	4.79769e-10	GSTA4	9.07724e-09	0.706147	0.703	0.69	0.000215004	2021-09-04	4.8216e-16	-1.35594	0.244	0.372	1.14204e-11	DDAH1	4.54428e-19	0.75667	0.294	0.212	1.07636e-14	CPLX1	2.56e-09	0.595895	0.179	0.09	6.06e-05
FCHSD2	2.20737e-14	0.698924	0.457	0.358	5.22838e-10	SERPINE1	9.33032e-09	-2.62968	0.099	0.188	0.000220998	EIF1AX	4.91854e-16	0.665393	0.818	0.806	1.165e-11	PTCH1	4.87498e-19	0.801499	0.499	0.45	1.15469e-14	RFX2	2.76e-09	-0.612826	0.034	0.09	6.55e-05
SGCB	2.27125e-14	0.881085	0.953	0.942	5.37968e-10	B3GNT7	9.48115e-09	1.1136	0.432	0.35	0.000224571	KCNJ8	5.38124e-16	-0.974219	0.047	0.133	1.2746e-11	GFOD2	4.90096e-19	0.541611	0.869	0.849	1.16084e-14	PRDX1	2.77e-09	0.715353	0.286	0.181	6.57e-05
EFCAB11	2.87654e-14	-0.55474	0.048	0.106	6.81338e-10	FMO4	9.81434e-09	-0.548311	0.008	0.057	0.000232462	KLRK1	5.52302e-16	1.14662	0.199	0.09	1.30818e-11	CTIF	4.9229e-19	0.631232	0.339	0.262	1.16604e-14	ACAA1	2.87e-09	-0.603494	0.552	0.63	6.81e-05
CH25H	2.90935e-14	-1.54577	0.017	0.056	6.89109e-10	ERO1L	9.88424e-09	-1.24979	0.091	0.182	0.000234118	LRRC4	6.27186e-16	0.711513	0.334	0.2	1.48555e-11	ZNF25	5.38862e-19	0.849251	0.268	0.186	1.27635e-14	ANO4	2.98e-09	0.767921	0.206	0.112	7.05e-05
DCC	2.9441e-14	0.645399	0.355	0.264	6.97341e-10	NOVA1	9.89729e-09	0.580212	0.893	0.914	0.000234427	BRD3	6.91512e-16	0.541362	0.813	0.829	1.63792e-11	DLEU7	5.6279e-19	-0.729266	0.021	0.067	1.33303e-14	SRSF9	3.05e-09	0.598064	0.277	0.17	7.23e-05
KLHL23	3.20543e-14	0.709392	0.423	0.326	7.59238e-10	MKX	1.00975e-08	-0.565515	0.008	0.057	0.000239169	LOC440040	7.01245e-16	0.582747	0.136	0.044	1.66097e-11	ABCB9	5.65316e-19	1.00317	0.152	0.087	1.33901e-14	STOM	3.05e-09	-1.04542	0.445	0.578	7.23e-05
CTSO	3.24579e-14	0.71385	0.305	0.214	7.68798e-10	LTBP2	1.03534e-08	-0.592069	0.015	0.07	0.000245231	TCTN2	8.27173e-16	-0.669967	0.338	0.466	1.95924e-11	TRIM46	5.91201e-19	1.08552	0.111	0.056	1.40032e-14	SFRP1	3.08e-09	0.651369	0.133	0.055	7.3e-05
VAT1L	3.3061e-14	1.02735	0.1	0.042	7.83084e-10	GNAS	1.044e-08	-0.710004	0.932	0.982	0.000247281	TLCD1	8.37665e-16	1.79547	0.152	0.058	1.98409e-11	CYFIP2	6.15756e-19	0.700741	0.504	0.43	1.45848e-14	KIAA1551	3.14e-09	0.652288	0.2	0.107	7.44e-05
DNAJC6	3.35443e-14	0.638749	0.302	0.21	7.94531e-10	ANKRD18DP	1.14404e-08	-0.580241	0.026	0.088	0.000270976	EGFL7	8.42369e-16	-0.571984	0.076	0.18	1.99524e-11	CDH10	7.63588e-19	0.894123	0.09	0.04	1.80863e-14	FAM162A	3.21e-09	-0.633049	0.326	0.439	7.59e-05
TUBB6	3.63879e-14	-0.673495	0.161	0.244	8.61883e-10	UBE2C	1.21829e-08	-0.514414	0.189	0.307	0.000288564	ST8SIA1	9.21136e-16	0.567961	0.734	0.659	2.1818e-11	SLC2A3	7.74198e-19	0.978932	0.267	0.191	1.83377e-14	WHSC1	3.22e-09	0.576263	0.521	0.453	7.63e-05
SLC6A1	4.07771e-14	0.856999	0.256	0.17	9.65845e-10	PAK3	1.28533e-08	0.866228	0.39	0.281	0.000304442	LCTL	9.44468e-16	-1.18765	0.025	0.096	2.23707e-11	MICAL3	7.95777e-19	0.659636	0.691	0.639	1.88488e-14	LOC374443	3.34e-09	0.716122	0.225	0.127	7.91e-05
TEAD4	4.37977e-14	-0.562011	0.023	0.066	1.03739e-09	HIP1	1.34243e-08	0.833672	0.906	0.898	0.000317967	AFAP1L2	9.97255e-16	0.70155	0.573	0.437	2.3621e-11	CYR61	8.13065e-19	0.8544	0.167	0.098	1.92583e-14	PCDHA8	3.39e-09	0.831796	0.17	0.084	8.04e-05
PIANP	4.51782e-14	0.500568	0.308	0.215	1.07009e-09	AFMID	1.35044e-08	0.529196	0.854	0.834	0.000319866	TMEM107	1.21194e-15	0.992721	0.391	0.263	2.87061e-11	HS6ST1	8.51181e-19	0.796262	0.314	0.24	2.01611e-14	EPB41	4.13e-09	0.742979	0.584	0.519	9.79e-05
APBB2	4.52139e-14	0.523632	0.72	0.649	1.07094e-09	TRAK1	1.38205e-08	0.85501	0.572	0.483	0.000327352	SHISA4	1.25549e-15	0.810859	0.694	0.654	2.97375e-11	FOXP2	1.0964e-18	0.715192	0.272	0.193	2.59693e-14	ANTXR2	4.36e-09	0.618716	0.222	0.131	0.000103195
FAM180A	4.63899e-14	-2.80082	0.008	0.04	1.09879e-09	SIRT2	1.66519e-08	0.863274	0.691	0.682	0.000394416	AKAP6	1.49002e-15	0.653545	0.387	0.251	3.52925e-11	MCTP1	1.14643e-18	0.862576	0.113	0.057	2.71543e-14	MEF2BNB	4.41e-09	-0.81936	0.239	0.342	0.000104454
APOE	5.00212e-14	-0.742197	0.088	0.159	1.1848e-09	HGD	1.67429e-08	-0.876762	0.002	0.042	0.000396573	IQSEC1	1.58533e-15	0.77398	0.55	0.451	3.75502e-11	PIK3C2B	1.15888e-18	0.500602	0.589	0.544	2.74493e-14	BRAT1	4.42e-09	-0.500574	0.4	0.528	0.000104749
GK	5.01373e-14	-0.589866	0.211	0.3	1.18755e-09	CACNG5	1.80042e-08	1.01842	0.217	0.121	0.000426447	SAT1	1.58916e-15	-1.43973	0.602	0.671	3.76408e-11	ARHGEF10L	1.20845e-18	0.841455	0.181	0.111	2.86234e-14	TSPAN11	4.46e-09	0.605972	0.375	0.271	0.000105548
TTC12	5.9334e-14	-0.779245	0.02	0.061	1.40539e-09	SPATA13	1.87517e-08	-0.611582	0.727	0.811	0.000444152	EIF4G3	1.60489e-15	0.643172	0.714	0.64	3.80133e-11	HERC2P9	1.23195e-18	0.625183	0.731	0.736	2.918e-14	PCSK1N	4.47e-09	-0.546099	0.803	0.808	0.000105826
PPP1R9A	6.69503e-14	0.618617	0.498	0.414	1.58578e-09	PSD2	1.88835e-08	-0.603917	0.155	0.256	0.000447274	PER1	1.7153e-15	0.661511	0.426	0.301	4.06286e-11	RGS17	1.40319e-18	1.05389	0.222	0.15	3.32359e-14	LAMA4	4.56e-09	-1.01746	0.09	0.169	0.000108092
CHST11	6.86986e-14	0.558262	0.445	0.354	1.6272e-09	CLEC10A	1.93109e-08	-1.81945	0.001	0.039	0.000457398	CCDC103	1.77087e-15	-0.591871	0.07	0.167	4.19448e-11	SPNS2	1.6162e-18	0.554626	0.194	0.125	3.82812e-14	TMEM206	4.82e-09	0.542209	0.332	0.223	0.000114169
FGF10	7.28541e-14	-1.1688	0.009	0.041	1.72562e-09	MYO7B	1.95339e-08	0.788022	0.127	0.054	0.000462681	ATOH8	1.8375e-15	0.540693	0.201	0.091	4.3523e-11	LYST	1.8935e-18	0.60806	0.553	0.495	4.48494e-14	ZNF506	4.88e-09	0.645338	0.696	0.653	0.000115528
PTCHD2	7.76582e-14	0.639633	0.264	0.178	1.83941e-09	GIMAP2	1.99655e-08	-0.668131	0.015	0.069	0.000472903	TK1	1.89546e-15	-0.506837	0.109	0.224	4.4896e-11	SH3BGRL2	1.98019e-18	0.799501	0.314	0.238	4.69027e-14	DYNC1I1	5.26e-09	-0.963985	0.109	0.192	0.000124616
MBD5	8.20321e-14	0.524647	0.49	0.402	1.94301e-09	IP6K2	2.17819e-08	0.604518	0.814	0.867	0.000515927	C1orf106	1.98552e-15	0.888628	0.478	0.364	4.70289e-11	CHRFAM7A	2.02565e-18	0.720017	0.173	0.106	4.79795e-14	GSTT1	5.32e-09	-0.789509	0.139	0.23	0.000126023
CERS6	9.49584e-14	0.556773	0.285	0.196	2.24918e-09	UNC119B	2.24954e-08	0.651753	0.205	0.331	0.000532825	GNG7	2.07854e-15	1.08991	0.486	0.388	4.92324e-11	PIANP	2.23352e-18	0.690675	0.082	0.035	5.29033e-14	L1CAM	5.33e-09	-0.505104	0.522	0.612	0.000126149
HOXA9	9.49931e-14	1.52317	0.117	0.057	2.25001e-09	ADD2	2.27873e-08	0.503571	0.57	0.458	0.000539739	PLCE1	2.28128e-15	0.556607	0.436	0.299	5.40344e-11	KCNK1	2.25926e-18	1.44805	0.089	0.04	5.35127e-14	RANGRF	5.64e-09	-0.606914	0.197	0.299	0.000133621
NDN	9.53904e-14	0.515139	0.096	0.04	2.25942e-09	DCUN1D2	2.31505e-08	0.732551	0.897	0.876	0.000548343	NALCN	2.30852e-15	0.794328	0.393	0.262	5.46795e-11	EBF2	2.53453e-18	1.00649	0.13	0.071	6.00329e-14	SDSL	5.95e-09	-0.64059	0.13	0.223	0.00014092
TOX3	1.00937e-13	0.838883	0.249	0.164	2.3908e-09	C16orf45	2.32752e-08	0.60576	0.78	0.749	0.000551297	HS3ST1	2.32888e-15	0.712439	0.31	0.18	5.51619e-11	EHBP1	2.59696e-18	0.930448	0.469	0.424	6.15117e-14	PMM1	6e-09	-0.564261	0.184	0.288	0.000142229
SLN	1.17153e-13	-1.76208	0.014	0.051	2.7749e-09	PROCR	2.37867e-08	-0.959506	0.003	0.045	0.000563413	SALL3	2.4729e-15	0.506316	0.53	0.398	5.8573e-11	PLEKHH1	2.66272e-18	0.752214	0.457	0.398	6.30692e-14	NUPR1	6.03e-09	-1.76036	0.019	0.064	0.000142761
INSM1	1.32983e-13	0.716201	0.187	0.111	3.14985e-09	TPH1	2.40556e-08	-0.53728	0.014	0.066	0.000569781	TPD52L1	2.57368e-15	-1.38468	0.008	0.06	6.09602e-11	TAGLN2	2.81378e-18	0.577268	0.278	0.403	6.66473e-14	ENKUR	6.06e-09	-0.812727	0.078	0.15	0.000143422
COTL1	1.44601e-13	0.516552	0.603	0.526	3.42502e-09	TANC2	2.59454e-08	0.583551	0.749	0.732	0.000614543	TIGD1	2.65394e-15	0.527722	0.846	0.801	6.28611e-11	PRKAR2B	2.82433e-18	0.741607	0.358	0.283	6.68972e-14	CXXC5	6.86e-09	-0.561303	0.275	0.393	0.000162449
COL9A2	1.48903e-13	0.715408	0.172	0.099	3.52691e-09	C9orf116	2.60066e-08	-0.926446	0.026	0.087	0.000615993	MAST1	2.7029e-15	0.68626	0.372	0.244	6.40209e-11	PCSK1N	3.06588e-18	0.725095	0.298	0.221	7.26185e-14	DGKQ	7.07e-09	0.7857	0.159	0.075	0.000167422
PLEKHA6	1.49618e-13	1.0605	0.22	0.14	3.54385e-09	FLVCR1	2.67294e-08	0.536097	0.929	0.912	0.000633112	ARL8A	2.84421e-15	0.775488	0.502	0.398	6.7368e-11	HSBP1	3.13519e-18	0.559492	0.824	0.867	7.42601e-14	SLITRK1	7.12e-09	0.526848	0.546	0.449	0.000168575
MMP2	1.52212e-13	0.54446	0.426	0.328	3.60529e-09	KIAA1107	2.75658e-08	0.812208	0.214	0.123	0.000652925	GRAMD2	3.23539e-15	0.802166	0.169	0.07	7.66336e-11	CBLN1	3.18228e-18	1.71964	0.185	0.122	7.53755e-14	NCEH1	7.29e-09	-0.681603	0.051	0.115	0.000172715
CKS2	1.75752e-13	-0.520788	0.32	0.418	4.16287e-09	SLC2A1	2.79717e-08	-0.642171	0.291	0.425	0.000662537	GDPD1	3.26872e-15	0.61455	0.859	0.836	7.7423e-11	CCDC68	3.19804e-18	-0.786964	0.034	0.085	7.57489e-14	BLVRB	7.36e-09	-0.980269	0.034	0.089	0.000174436
BRWD1	1.9194e-13	0.613454	0.797	0.761	4.5463e-09	CYYR1	2.83668e-08	-0.874495	0.044	0.116	0.000671896	RUNDC3A	3.32162e-15	0.881393	0.324	0.198	7.86759e-11	NTRK2	3.34507e-18	0.594021	0.102	0.05	7.92314e-14	ITGB1	7.43e-09	0.51456	0.444	0.338	0.000175989
LEPREL1	2.06275e-13	-0.565226	0.055	0.112	4.88584e-09	CLEC3B	2.94411e-08	-1.04663	0.007	0.052	0.000697341	KRBOX1	3.39758e-15	0.736696	0.231	0.113	8.04751e-11	GPR78	3.47402e-18	1.18418	0.287	0.219	8.22857e-14	CLEC2D	7.81e-09	0.518343	0.571	0.505	0.000184926
GPNMB	2.0886e-13	-1.17205	0.022	0.063	4.94705e-09	CRMP1	2.95748e-08	0.59627	0.717	0.654	0.000700508	BIRC5	3.51748e-15	-0.569206	0.163	0.285	8.33151e-11	NETO1	3.62337e-18	1.05082	0.05	0.015	8.58231e-14	SLAIN2	7.82e-09	0.53761	0.235	0.135	0.000185294
RHNO1	2.11506e-13	-0.504187	0.368	0.458	5.00973e-09	EDNRA	2.96637e-08	-0.622926	0.013	0.063	0.000702614	GATM	3.55919e-15	0.645849	0.454	0.306	8.4303e-11	DBC1	3.74413e-18	1.19601	0.162	0.098	8.86834e-14	NDUFAF3	8.08e-09	-0.59071	0.441	0.541	0.000191342
FBXO11	2.12202e-13	0.608204	0.626	0.553	5.02622e-09	EXTL1	3.19148e-08	0.840153	0.132	0.058	0.000755934	CLEC14A	3.65279e-15	1.58871	0.073	0.01	8.65199e-11	INSM1	3.74713e-18	0.671347	0.39	0.313	8.87546e-14	ARHGAP33	8.26e-09	0.508505	0.525	0.422	0.000195728
SCAMP1	2.17284e-13	0.596227	0.856	0.836	5.14659e-09	ZNF652	3.20424e-08	0.511074	0.894	0.883	0.000758957	MEIS3	3.91218e-15	0.787515	0.472	0.352	9.26638e-11	ARL4C	3.92431e-18	0.790889	0.233	0.158	9.29511e-14	SDC2	8.44e-09	-0.734429	0.015	0.056	0.0001999
SLC8A3	2.20903e-13	0.694044	0.085	0.033	5.23231e-09	ADIRF	3.31994e-08	-0.808497	0.005	0.047	0.000786362	TSPAN11	4.03612e-15	0.691	0.465	0.33	9.55994e-11	PIK3IP1	4.27691e-18	1.20517	0.12	0.064	1.01303e-13	RARB	8.52e-09	-0.629842	0.062	0.131	0.000201782
COL4A3	2.32944e-13	0.693845	0.096	0.042	5.51752e-09	KCNK9	3.47108e-08	-0.665375	0.042	0.112	0.000822159	RAB3C	4.28681e-15	1.17458	0.26	0.14	1.01537e-10	TSPYL4	4.46652e-18	0.534966	0.663	0.657	1.05794e-13	CNOT6L	9.85e-09	0.566683	0.29	0.184	0.000233298
KLHL21	2.3367e-13	-0.505747	0.204	0.295	5.53471e-09	PLAGL1	3.62062e-08	-0.765434	0.035	0.1	0.000857579	GABRA2	4.4473e-15	-0.507043	0.154	0.275	1.05339e-10	ARHGEF2	4.79413e-18	0.717234	0.609	0.586	1.13554e-13	ANKRD50	9.88e-09	0.764784	0.183	0.095	0.000233968
SERTAD1	2.41346e-13	-0.600601	0.302	0.405	5.71653e-09	SCARNA9	3.70812e-08	-0.573885	0.044	0.115	0.000878305	HOXB2	4.53748e-15	0.537457	0.101	0.025	1.07475e-10	NAV2-AS5	4.83676e-18	0.685368	0.059	0.021	1.14564e-13	SFT2D2	1.04e-08	0.787314	0.232	0.139	0.000246686
PLCXD2	2.42188e-13	0.591054	0.087	0.034	5.73647e-09	BBOX1	3.73702e-08	-1.11126	0.024	0.084	0.00088515	UBA7	4.77457e-15	-0.740074	0.032	0.106	1.1309e-10	ALDH1A3	5.75781e-18	1.1097	0.217	0.147	1.3638e-13	MSL1	1.06e-08	0.583685	0.55	0.429	0.000250088
GPKOW	2.44523e-13	-0.541372	0.444	0.536	5.79177e-09	SLC16A3	3.85447e-08	-0.97224	0.038	0.106	0.00091297	CDH3	5.21678e-15	1.04083	0.154	0.06	1.23565e-10	CNTNAP2	5.99974e-18	0.750928	0.493	0.432	1.4211e-13	ABHD11	1.14e-08	-0.691526	0.657	0.756	0.000269711
USP43	2.74218e-13	0.554172	0.071	0.024	6.49513e-09	SLC13A5	4.00912e-08	-0.897939	0.049	0.121	0.000949601	CADM4	5.66003e-15	0.680546	0.426	0.315	1.34063e-10	GPR162	6.35815e-18	0.873565	0.189	0.119	1.50599e-13	HERPUD1	1.15e-08	-0.553296	0.366	0.475	0.000271612
ZNF536	3.28159e-13	0.889848	0.141	0.075	7.77279e-09	ACAP3	4.1195e-08	0.54138	0.501	0.406	0.000975745	HRASLS	5.7646e-15	0.589879	0.478	0.335	1.3654e-10	CHRNA7	7.00641e-18	0.936334	0.356	0.283	1.65954e-13	KDM4B	1.15e-08	0.600063	0.449	0.368	0.000272294
SPAG5	3.49594e-13	-0.582717	0.153	0.233	8.28049e-09	FAM110B	4.24178e-08	0.735085	0.707	0.671	0.00100471	SLC12A6	6.65337e-15	0.578365	0.789	0.742	1.57592e-10	BTBD3	7.5811e-18	1.28786	0.35	0.289	1.79566e-13	HR	1.16e-08	0.506523	0.174	0.088	0.000274284
BNIP3	3.89644e-13	-0.739252	0.474	0.58	9.22911e-09	RAP1GAP	4.27051e-08	0.73592	0.321	0.214	0.00101151	SOX5	6.98558e-15	0.648148	0.694	0.622	1.6546e-10	GFAP	7.74625e-18	0.842525	0.091	0.042	1.83478e-13	MFGE8	1.23e-08	-0.698275	0.308	0.419	0.000291432
KCNMB2	3.91599e-13	0.994147	0.12	0.059	9.27542e-09	TIGD1	4.29979e-08	0.501314	0.895	0.9	0.00101845	SRPX	7.27695e-15	-0.725532	0.053	0.138	1.72362e-10	MAPRE3	8.9247e-18	0.741946	0.302	0.228	2.1139e-13	NAALAD2	1.3e-08	0.578836	0.154	0.073	0.000307739
SCARB1	3.97106e-13	-0.637412	0.337	0.432	9.40586e-09	ATP1A3	4.44814e-08	0.501641	0.53	0.431	0.00105359	E2F3	7.41493e-15	-1.0336	0.368	0.495	1.7563e-10	ASXL3	9.65892e-18	0.531134	0.354	0.269	2.28781e-13	NPTX2	1.36e-08	-0.792859	0.006	0.036	0.000321637
RGS20	4.01496e-13	-0.600774	0.069	0.131	9.50984e-09	EYA1	4.49465e-08	1.21294	0.166	0.084	0.0010646	APBB1	8.62244e-15	0.526895	0.69	0.612	2.04231e-10	BTBD17	1.03577e-17	1.02547	0.134	0.076	2.45332e-13	SNAI2	1.37e-08	-0.904402	0.028	0.079	0.000324897
CCDC144C	4.15277e-13	0.505262	0.483	0.4	9.83625e-09	P2RX7	4.5814e-08	0.788251	0.566	0.487	0.00108515	PRKXP1	8.88024e-15	0.501391	0.738	0.724	2.10337e-10	SLC4A3	1.11603e-17	0.775476	0.231	0.159	2.64344e-13	P4HA1	1.4e-08	-0.622038	0.285	0.397	0.00033096
VSTM2B	4.19239e-13	0.713662	0.038	0.005	9.9301e-09	DLL1	4.7906e-08	0.905175	0.364	0.263	0.0011347	CALM3	8.9418e-15	0.544373	0.855	0.849	2.11796e-10	RAPSN	1.14306e-17	-1.11839	0.011	0.048	2.70746e-13	BAG3	1.5e-08	-1.07863	0.027	0.075	0.000356249
TTK	4.285e-13	-0.643046	0.055	0.112	1.01494e-08	NLGN2	5.01414e-08	0.625766	0.611	0.59	0.00118765	C10orf107	9.55295e-15	-1.00204	0.029	0.099	2.26271e-10	CNN2	1.29202e-17	-0.667439	0.152	0.228	3.06028e-13	ZNF736	1.54e-08	0.642315	0.292	0.191	0.000365838
RARRES3	4.58565e-13	-0.830355	0.082	0.148	1.08616e-08	TMEM196	5.82946e-08	0.839438	0.091	0.031	0.00138077	PPP2R2B	9.8264e-15	0.514029	0.714	0.609	2.32748e-10	KLK4	1.39904e-17	0.525142	0.041	0.011	3.31377e-13	GFPT2	1.66e-08	-0.7859	0.054	0.117	0.000392536
PAXBP1	4.68309e-13	0.575976	0.6	0.528	1.10924e-08	ITGA2	6.01072e-08	-0.642344	0.416	0.503	0.0014237	ELMSAN1	1.00445e-14	0.738069	0.687	0.624	2.37913e-10	TIA1	1.46045e-17	0.530825	0.82	0.826	3.45923e-13	PHYHD1	1.71e-08	-0.521932	0.632	0.739	0.00040531
CACNA2D1	5.64458e-13	0.618935	0.18	0.105	1.33698e-08	DAZ2	6.18619e-08	-1.10314	0.003	0.042	0.00146526	CYP4F24P	1.07764e-14	0.792207	0.109	0.031	2.55249e-10	NDST4	1.48359e-17	1.32883	0.109	0.057	3.51404e-13	SLC24A3	1.89e-08	0.525948	0.324	0.216	0.000447753
FOSL1	5.91224e-13	-0.614959	0.075	0.138	1.40037e-08	ST8SIA3	6.3059e-08	0.966896	0.267	0.171	0.00149361	LPPR2	1.11858e-14	0.573674	0.646	0.56	2.64947e-10	ST8SIA4	1.48577e-17	1.02977	0.604	0.565	3.5192e-13	PHKA2	1.91e-08	0.651501	0.163	0.081	0.00045163
CRYAB	5.94178e-13	-1.03115	0.345	0.432	1.40737e-08	EHD2	6.43589e-08	-1.04928	0.36	0.455	0.0015244	VCAM1	1.1871e-14	-0.89745	0.026	0.095	2.81177e-10	METTL24	1.48795e-17	-0.564119	0.008	0.041	3.52435e-13	ZNF737	2.16e-08	0.505436	0.914	0.903	0.000511509
FAM222A	6.60223e-13	0.644711	0.218	0.139	1.5638e-08	PXDNL	6.6971e-08	-0.783806	0.059	0.135	0.00158627	SSTR1	1.2356e-14	1.39898	0.157	0.064	2.92665e-10	SOX5	1.49407e-17	0.962587	0.218	0.148	3.53886e-13	ZNF721	2.3e-08	0.723032	0.541	0.472	0.0005454
RUNX1T1	7.05144e-13	0.728343	0.184	0.112	1.6702e-08	SCAMP5	7.30351e-08	0.641575	0.444	0.359	0.00172991	SNTB1	1.26263e-14	-0.507524	0.04	0.118	2.99066e-10	LIMCH1	1.51893e-17	0.850127	0.24	0.167	3.59773e-13	PPP2R3A	2.38e-08	0.828029	0.218	0.131	0.000562836
PLK1S1	7.15714e-13	0.618155	0.533	0.452	1.69524e-08	TRA2A	7.45523e-08	0.555792	0.941	0.959	0.00176585	NEK9	1.31577e-14	0.598519	0.46	0.326	3.11654e-10	ABCC5	1.64343e-17	0.849484	0.457	0.404	3.89263e-13	PCGF5	2.39e-08	-0.94818	0.725	0.808	0.000567261
CKMT1B	7.38953e-13	0.846299	0.083	0.033	1.75029e-08	TSPAN8	7.66698e-08	-1.08455	0.001	0.036	0.001816	COL12A1	1.37356e-14	-1.06941	0.026	0.093	3.25341e-10	TTR	1.72477e-17	-1.72903	0.078	0.142	4.08529e-13	ST5	2.55e-08	-0.634282	0.256	0.359	0.000602979
GAL3ST3	7.49578e-13	0.572027	0.167	0.097	1.77545e-08	SNED1	7.9929e-08	-0.790675	0.061	0.135	0.0018932	SPARC	1.37457e-14	-0.892106	0.764	0.838	3.2558e-10	ZIC2	1.7695e-17	0.858599	0.392	0.328	4.19123e-13	BTG2	2.84e-08	-0.652832	0.656	0.719	0.000671925
SCFD2	7.59463e-13	1.01993	0.394	0.312	1.79886e-08	SLC1A6	8.18023e-08	0.786196	0.125	0.054	0.00193757	VAT1L	1.38868e-14	1.31103	0.204	0.1	3.28924e-10	DOCK4	1.86259e-17	0.861964	0.394	0.323	4.41172e-13	CYP2J2	3.02e-08	-0.739546	0.028	0.076	0.000714315
HMMR	7.86592e-13	-0.591325	0.037	0.086	1.86312e-08	SNTG1	8.38952e-08	0.854407	0.512	0.424	0.00198714	PCDH17	1.47821e-14	0.584576	0.743	0.685	3.50128e-10	C7	2.11559e-17	-1.09629	0.203	0.282	5.01099e-13	ST7	3.15e-08	-0.604969	0.405	0.501	0.000746986
RCAN1	8.05165e-13	-0.641756	0.294	0.384	1.90711e-08	SULT1A1	8.69668e-08	-0.724889	0.079	0.159	0.0020599	WDR6	1.50929e-14	0.527166	0.8	0.782	3.57491e-10	GCGR	2.16343e-17	1.17983	0.044	0.012	5.12431e-13	GABRG2	3.33e-08	0.512345	0.445	0.342	0.000789791
COL24A1	8.89976e-13	-0.578534	0.012	0.045	2.108e-08	PCSK2	8.81613e-08	0.646981	0.11	0.045	0.00208819	ITGA7	1.6578e-14	-0.746552	0.25	0.38	3.92665e-10	RBFOX3	2.35856e-17	0.513813	0.333	0.256	5.58649e-13	ACTA2	3.37e-08	-1.39495	0.042	0.097	0.000799314
ZNF812	9.44043e-13	-1.40039	0.04	0.089	2.23606e-08	ATAT1	9.47528e-08	0.613242	0.783	0.778	0.00224431	IFI44L	1.68153e-14	-0.710538	0.027	0.095	3.98287e-10	OR4N3P	2.48922e-17	1.24689	0.032	0.006	5.89597e-13	PDZRN3	3.41e-08	-0.583975	0.002	0.025	0.000807667
EBP	1.00021e-12	-0.556073	0.398	0.487	2.36909e-08	RAMP2	9.52802e-08	-0.683574	0.15	0.245	0.00225681	PGF	1.82127e-14	-1.33332	0.012	0.066	4.31386e-10	RAP1GAP2	2.58739e-17	0.827823	0.302	0.233	6.12849e-13	TMEM205	3.42e-08	-0.536461	0.366	0.477	0.000810174
NFKBIZ	1.02074e-12	-0.967631	0.342	0.446	2.41772e-08	PRKCDBP	9.75297e-08	-0.69165	0.031	0.093	0.00231009	SHC3	1.87811e-14	0.789234	0.476	0.354	4.44849e-10	BMP5	2.81784e-17	1.29567	0.041	0.011	6.67433e-13	RAB4B	3.58e-08	-0.680519	0.118	0.201	0.000848326
CKMT1A	1.02458e-12	0.811228	0.072	0.026	2.42682e-08	HOXA10	9.75618e-08	0.804023	0.242	0.147	0.00231085	GLT25D2	2.07518e-14	-0.525324	0.311	0.442	4.91528e-10	HCAR1	2.92829e-17	1.20162	0.491	0.445	6.93595e-13	SEMA6A	3.78e-08	-0.515642	0.556	0.632	0.000895875
ANO4	1.0312e-12	0.627548	0.077	0.03	2.44249e-08	CDCA8	9.80634e-08	-0.572156	0.093	0.181	0.00232273	PAXBP1	2.29033e-14	0.835006	0.538	0.432	5.42487e-10	GNAI1	2.96911e-17	0.900127	0.365	0.294	7.03263e-13	RPS6KA2	3.79e-08	-0.58898	0.337	0.448	0.000896777
COPG2	1.03198e-12	0.559394	0.534	0.456	2.44435e-08	NCKAP5	1.00513e-07	0.806505	0.283	0.187	0.00238075	ADAMTS10	2.31029e-14	0.625527	0.221	0.112	5.47215e-10	CNKSR2	3.15799e-17	0.905948	0.216	0.147	7.48003e-13	DLGAP1-AS5	3.85e-08	0.60033	0.152	0.075	0.000911452
ST7	1.03318e-12	0.69572	0.49	0.411	2.4472e-08	NREP	1.02619e-07	0.746913	0.716	0.731	0.00243063	TENM1	2.34423e-14	0.644511	0.4	0.279	5.55255e-10	CADPS2	3.2178e-17	1.09967	0.093	0.045	7.62169e-13	EMP2	3.97e-08	-0.983378	0.92	0.943	0.000941241
CACNG4	1.05026e-12	0.586884	0.292	0.211	2.48764e-08	ADORA1	1.03089e-07	-0.66246	0.228	0.342	0.00244178	ECM1	2.45775e-14	-1.21371	0.061	0.148	5.82142e-10	RUNDC3B	3.28346e-17	1.16856	0.217	0.15	7.7772e-13	TJP2	4.19e-08	-0.666004	0.069	0.136	0.000991949
FANCB	1.05103e-12	-0.547038	0.093	0.16	2.48947e-08	ID2	1.07877e-07	0.517899	0.622	0.552	0.00255517	CCNB1	2.47696e-14	-0.748526	0.097	0.201	5.86692e-10	NDRG1	3.47173e-17	0.611099	0.217	0.148	8.22315e-13	HSDL2	4.23e-08	-0.528982	0.17	0.263	0.00100292
ARL4D	1.08617e-12	0.687044	0.248	0.169	2.57269e-08	PCDH11X	1.08452e-07	0.547794	0.913	0.912	0.0025688	IQGAP3	2.51329e-14	-0.570727	0.128	0.239	5.95297e-10	HK1	3.65253e-17	0.862279	0.338	0.265	8.65138e-13	PACRG	4.28e-08	-0.929022	0.088	0.162	0.00101417
CCL2	1.12955e-12	-2.17812	0.025	0.066	2.67545e-08	METTL7A	1.1019e-07	-0.660572	0.642	0.716	0.00260996	NEGR1	2.58411e-14	0.998895	0.322	0.202	6.12073e-10	GOLGA8T	3.75407e-17	0.815678	0.188	0.121	8.89189e-13	PAQR8	4.38e-08	-0.634854	0.16	0.248	0.00103816
USP32P1	1.2566e-12	0.665973	0.443	0.363	2.97637e-08	KDM5B	1.18985e-07	0.821605	0.619	0.6	0.00281828	SPTAN1	2.72679e-14	0.562767	0.83	0.813	6.45868e-10	MSLN	4.55893e-17	0.944382	0.059	0.022	1.07983e-12	COMTD1	4.52e-08	-0.795866	0.039	0.093	0.0010697
CD74	1.29295e-12	-0.87673	0.068	0.126	3.06249e-08	MELK	1.20586e-07	-0.564346	0.214	0.313	0.0028562	DISC1	2.73519e-14	0.979045	0.533	0.43	6.47858e-10	UNC79	4.62214e-17	0.631703	0.533	0.477	1.0948e-12	MARK1	4.83e-08	0.627353	0.295	0.192	0.00114343
MELK	1.44455e-12	-0.563323	0.21	0.29	3.42157e-08	RGS10	1.21287e-07	-0.586594	0.01	0.056	0.0028728	PPP1R3C	2.77242e-14	-0.830629	0.027	0.096	6.56675e-10	MIR568	4.62279e-17	0.813029	0.167	0.104	1.09495e-12	DENND6B	4.85e-08	-0.784142	0.092	0.167	0.00114849
FAM5B	1.45768e-12	0.80786	0.301	0.223	3.45266e-08	MAST1	1.2214e-07	0.817782	0.399	0.3	0.00289301	CACNB2	2.89985e-14	0.957414	0.432	0.319	6.86859e-10	ISPD	4.73334e-17	0.62671	0.409	0.343	1.12114e-12	LEMD3	5.08e-08	0.531936	0.262	0.167	0.00120375
PCDHB9	1.48388e-12	0.590049	0.828	0.803	3.51472e-08	SPOCD1	1.2433e-07	-0.903147	0.026	0.082	0.00294489	CEND1	2.97973e-14	0.811259	0.392	0.279	7.05778e-10	PRKD1	4.95654e-17	0.597509	0.06	0.022	1.17401e-12	EPN2-AS1	5.33e-08	0.567112	0.196	0.113	0.00126266
TNFRSF21	1.51781e-12	0.541532	0.513	0.435	3.59509e-08	TUBA1C	1.26915e-07	-1.01221	0.684	0.7	0.00300612	GPR37	3.08055e-14	-0.759435	0.014	0.07	7.2966e-10	FAM83D	4.97308e-17	-0.601325	0.053	0.109	1.17792e-12	FAM160B1	5.38e-08	0.573693	0.26	0.167	0.00127529
KCNIP2	1.5381e-12	0.924947	0.114	0.057	3.64314e-08	C4orf47	1.27685e-07	-0.571523	0.013	0.06	0.00302435	DOCK3	3.16404e-14	0.522564	0.427	0.3	7.49433e-10	PTCH2	5.12121e-17	0.713907	0.225	0.155	1.21301e-12	ARG1	5.77e-08	0.526128	0.075	0.02	0.00136556
AMOT	1.54577e-12	0.864044	0.133	0.071	3.66132e-08	TLE2	1.30658e-07	-2.04513	0.256	0.347	0.00309477	SALL2	3.19754e-14	0.726754	0.377	0.254	7.5737e-10	ABCD2	5.36705e-17	0.968478	0.13	0.072	1.27124e-12	PLSCR4	6.05e-08	-0.598822	0.067	0.134	0.00143386
FTL	1.55099e-12	-0.809293	0.966	0.967	3.67367e-08	C14orf132	1.36183e-07	0.568397	0.699	0.636	0.00322564	H2AFZ	3.77862e-14	-0.651646	0.787	0.861	8.95005e-10	CYP3A5	5.45288e-17	1.15116	0.192	0.127	1.29157e-12	LOC155060	6.2e-08	-0.685109	0.333	0.439	0.00146867
IL32	1.58951e-12	-1.22831	0.012	0.044	3.76492e-08	RGS5	1.39026e-07	-0.552814	0.066	0.145	0.00329297	ITPR2	3.83723e-14	0.699693	0.556	0.43	9.08887e-10	ABCC8	6.50944e-17	0.861512	0.362	0.293	1.54183e-12	PLD5	6.45e-08	-0.705985	0.084	0.155	0.00152827
FAM155A	1.65188e-12	0.5131	0.103	0.048	3.91265e-08	SEZ6	1.39134e-07	1.12897	0.233	0.147	0.00329554	GATS	3.88261e-14	0.935427	0.359	0.241	9.19635e-10	LRRC49	6.84727e-17	0.815504	0.33	0.254	1.62184e-12	BUD31	6.66e-08	-0.525434	0.467	0.56	0.00157853
PCDHGA11	1.68951e-12	-0.685736	0.189	0.271	4.00177e-08	ACTC1	1.39775e-07	0.991514	0.125	0.056	0.00331071	NAP1L3	4.03219e-14	0.762346	0.5	0.368	9.55065e-10	EME1	7.53961e-17	-0.645412	0.046	0.099	1.78583e-12	TMEM109	6.86e-08	-0.615469	0.1	0.176	0.00162597
HMOX1	1.70627e-12	-1.46776	0.02	0.058	4.04146e-08	R3HDM2	1.42049e-07	0.613333	0.854	0.846	0.00336458	CLUL1	4.73548e-14	-0.740653	0.019	0.079	1.12165e-09	KLHL35	8.06099e-17	0.772124	0.181	0.114	1.90933e-12	AIMP2	7.37e-08	-0.578353	0.326	0.425	0.0017453
TCEAL7	1.93749e-12	0.677273	0.449	0.382	4.58915e-08	HERC2P9	1.44186e-07	0.645093	0.798	0.814	0.00341519	AGAP1	4.76888e-14	0.794787	0.582	0.475	1.12956e-09	MSANTD4	8.18189e-17	0.817399	0.364	0.296	1.93796e-12	TMEM121	7.39e-08	0.571016	0.174	0.092	0.00174986
PPP1R3C	1.9692e-12	-1.01843	0.045	0.096	4.66425e-08	CNIH3	1.49256e-07	-0.555811	0.035	0.097	0.00353527	C8orf46	4.90847e-14	1.27031	0.256	0.146	1.16262e-09	HIST1H4C	8.40751e-17	-0.851961	0.372	0.485	1.9914e-12	HIST2H3A	7.76e-08	-0.700033	0.037	0.088	0.00183828
ZNF662	2.34811e-12	0.508666	0.798	0.771	5.56174e-08	LARP6	1.4929e-07	-0.630779	0.1	0.185	0.00353608	KLF12	4.95536e-14	0.766591	0.612	0.529	1.17373e-09	GPR149	8.86081e-17	0.570767	0.054	0.018	2.09877e-12	HIST2H3C	7.76e-08	-0.700033	0.037	0.088	0.00183828
SLC1A6	2.36226e-12	0.704231	0.048	0.012	5.59526e-08	SHROOM2	1.50354e-07	0.709083	0.423	0.32	0.0035613	GALNT13	5.01215e-14	0.754165	0.384	0.258	1.18718e-09	SHF	8.97208e-17	0.695103	0.242	0.173	2.12513e-12	C19orf66	8.01e-08	-0.593844	0.161	0.252	0.0018966
NFASC	2.3929e-12	1.25181	0.461	0.362	5.66782e-08	TNNT3	1.55795e-07	-0.8131	0.003	0.04	0.00369016	CSRP2	5.38538e-14	-1.35249	0.175	0.294	1.27558e-09	RGL1	1.03676e-16	0.65445	0.267	0.19	2.45567e-12	TP53I13	8.19e-08	-0.830838	0.05	0.108	0.00193946
NNMT	2.50553e-12	-1.15232	0.122	0.191	5.93461e-08	SEL1L3	1.69902e-07	0.539093	0.34	0.238	0.0040243	VARS2	5.70019e-14	0.621382	0.404	0.288	1.35015e-09	OPCML	1.05707e-16	0.79241	0.096	0.047	2.50378e-12	SNORA57	8.29e-08	-0.825729	0.027	0.073	0.00196449
FBLN5	2.56114e-12	-0.516687	0.027	0.069	6.06631e-08	MEGF11	1.71575e-07	0.962838	0.436	0.351	0.00406393	ZNF276	5.89283e-14	0.699376	0.685	0.603	1.39578e-09	IQCA1	1.21839e-16	0.941154	0.178	0.114	2.88588e-12	NFXL1	8.44e-08	0.637711	0.27	0.176	0.00200002
BCAR3	3.18024e-12	-0.530684	0.073	0.132	7.53273e-08	COL9A3	1.74492e-07	0.515793	0.593	0.54	0.00413303	CAV1	5.9461e-14	-1.02363	0.069	0.157	1.40839e-09	MAP3K12	1.39593e-16	0.651616	0.241	0.17	3.3064e-12	IDUA	9.12e-08	0.552962	0.252	0.159	0.00216113
ARMCX4	3.24666e-12	0.532105	0.362	0.27	7.69005e-08	FRMD3	1.74915e-07	-0.537524	0.069	0.146	0.00414303	FAM84B	6.37967e-14	0.692646	0.641	0.557	1.51109e-09	KRT17	1.49305e-16	1.23633	0.117	0.064	3.53645e-12	CRYBB2	9.25e-08	-0.512238	0.062	0.125	0.00218981
DGKG	3.26602e-12	0.719584	0.449	0.377	7.7359e-08	NMNAT2	1.89793e-07	0.891678	0.276	0.182	0.00449544	GRM7	6.45913e-14	1.05609	0.103	0.029	1.52991e-09	NCAM2	1.76122e-16	1.01525	0.101	0.052	4.17162e-12	FAM182B	9.44e-08	-0.647613	0.065	0.13	0.00223714
CNTNAP4	4.50764e-12	0.621707	0.051	0.014	1.06768e-07	EPN2-AS1	1.89945e-07	0.946087	0.275	0.188	0.00449903	BAMBI	6.87494e-14	1.2658	0.386	0.273	1.6284e-09	DEXI	1.76203e-16	0.5066	0.267	0.189	4.17355e-12	RRAGD	9.67e-08	-0.502012	0.19	0.28	0.00229091
ASS1	4.55083e-12	-0.959478	0.089	0.151	1.07791e-07	HSPB2	1.9332e-07	-0.515401	0.023	0.078	0.00457897	PTGDS	7.01814e-14	-1.13375	0.214	0.336	1.66232e-09	FAM115A	1.84006e-16	0.513859	0.77	0.771	4.35836e-12	SERTAD1	9.78e-08	-0.934761	0.055	0.115	0.00231737
SERP2	4.65791e-12	0.598799	0.122	0.063	1.10327e-07	CYBA	2.06593e-07	-0.596111	0.013	0.059	0.00489337	EFNA4	7.18568e-14	-1.55422	0.018	0.076	1.702e-09	ZNF91	1.95561e-16	0.593661	0.779	0.753	4.63207e-12	ZKSCAN8	1.04e-07	0.563949	0.57	0.494	0.00246133
HOXB-AS5	4.71539e-12	-0.802454	0.005	0.03	1.11689e-07	IGSF21	2.0852e-07	1.11075	0.15	0.076	0.00493901	SEZ6	7.38894e-14	0.5469	0.175	0.077	1.75014e-09	PDE10A	2.05007e-16	0.570846	0.056	0.02	4.85579e-12	TNFSF13B	1.08e-07	0.678263	0.146	0.071	0.00256727
ME1	5.09001e-12	0.721863	0.076	0.03	1.20562e-07	H1F0	2.10237e-07	0.757232	0.604	0.513	0.00497967	IFI35	7.49354e-14	-0.640461	0.028	0.095	1.77492e-09	ZC3H12C	2.15698e-16	0.707513	0.125	0.069	5.10902e-12	CIB1	1.09e-07	-0.505139	0.189	0.28	0.00258158
PTPRK	5.12381e-12	0.895454	0.411	0.335	1.21363e-07	B3GAT2	2.11032e-07	1.19853	0.219	0.138	0.00499849	SBF2-AS1	7.52748e-14	0.504545	0.69	0.646	1.78296e-09	RIC3	2.244e-16	0.690505	0.455	0.39	5.31514e-12	CCDC41	1.17e-07	0.816857	0.213	0.126	0.00276973
KIF20A	5.25092e-12	-0.609922	0.057	0.11	1.24373e-07	ANO3	2.33886e-07	0.61913	0.133	0.063	0.00553982	ACHE	8.00523e-14	1.29819	0.215	0.116	1.89612e-09	KIF26A	2.2492e-16	0.528635	0.157	0.098	5.32745e-12	GLIPR1	1.18e-07	0.526366	0.142	0.069	0.00279789
PLK1	5.49592e-12	-0.851028	0.089	0.15	1.30176e-07	NPPA	2.41551e-07	1.15305	0.219	0.134	0.00572138	LAMA5	8.25335e-14	-0.616541	0.345	0.475	1.95489e-09	CLMP	2.44325e-16	0.666047	0.119	0.065	5.78708e-12	M6PR	1.2e-07	0.523037	0.46	0.364	0.00284778
PLXNA4	6.12831e-12	1.28883	0.264	0.19	1.45155e-07	CRYM	2.45236e-07	-1.54905	0.006	0.045	0.00580867	MLC1	8.38866e-14	-0.892262	0.282	0.396	1.98694e-09	CACNB3	2.51124e-16	0.597984	0.292	0.216	5.94812e-12	HIST1H2BK	1.2e-07	-1.11987	0.066	0.127	0.00285106
VILL	6.16182e-12	0.762339	0.102	0.049	1.45949e-07	RNF165	2.53464e-07	0.574391	0.407	0.304	0.00600354	PRSS23	8.91263e-14	-0.945323	0.067	0.155	2.11105e-09	FAM64A	2.75252e-16	-0.724458	0.062	0.12	6.51962e-12	ABHD8	1.24e-07	-0.915431	0.031	0.079	0.00294234
EFHC2	6.34569e-12	-0.703784	0.027	0.067	1.50304e-07	C1orf56	2.55333e-07	1.06269	0.59	0.547	0.00604781	STXBP5L	9.11674e-14	0.70378	0.369	0.255	2.15939e-09	DRGX	3.09503e-16	1.24902	0.061	0.024	7.33089e-12	CDCA7	1.24e-07	-0.682238	0.059	0.121	0.0029489
KCNJ16	6.41379e-12	0.629596	0.272	0.194	1.51917e-07	ZIM2	2.56425e-07	0.928509	0.245	0.158	0.00607368	OLFM1	9.52588e-14	0.763643	0.299	0.18	2.2563e-09	GPD1	3.23401e-16	1.42129	0.044	0.013	7.66008e-12	TMEM178A	1.31e-07	-0.764985	0.229	0.323	0.00309265
ADAMTS4	7.26165e-12	0.530787	0.861	0.851	1.71999e-07	KIF5A	2.56464e-07	0.73052	0.431	0.341	0.0060746	MXRA8	9.53429e-14	-1.38215	0.058	0.139	2.25829e-09	SLC22A15	3.30304e-16	0.889971	0.037	0.01	7.82358e-12	TTC38	1.34e-07	-0.923908	0.041	0.093	0.00316755
DOCK4	7.34116e-12	0.502039	0.573	0.491	1.73883e-07	HFM1	2.6015e-07	0.670025	0.185	0.105	0.00616191	D2HGDH	9.89271e-14	0.532739	0.291	0.175	2.34319e-09	NAV3	3.49096e-16	0.57776	0.078	0.036	8.26868e-12	HIST1H2BC	1.46e-07	-1.15392	0.048	0.103	0.00345568
TMEM161B-AS1	7.72817e-12	0.715801	0.413	0.331	1.83049e-07	NEFM	2.74337e-07	1.06335	0.365	0.267	0.00649794	TLR4	1.04272e-13	-0.542902	0.024	0.087	2.46978e-09	SLC37A1	4.33427e-16	0.754065	0.077	0.034	1.02661e-11	ATE1	1.59e-07	0.536194	0.34	0.243	0.00376375
LPIN1	7.8846e-12	0.52552	0.647	0.58	1.86755e-07	CDH7	2.76557e-07	-1.23389	0.037	0.097	0.00655052	FOXP2	1.13726e-13	-0.528208	0.148	0.262	2.69371e-09	HSD11B2	4.34077e-16	0.791859	0.223	0.153	1.02815e-11	PIGG	1.64e-07	0.532453	0.392	0.288	0.00388945
HK2	8.5891e-12	-0.835399	0.234	0.314	2.03441e-07	NRIP3	2.77053e-07	0.825314	0.847	0.824	0.00656228	ADCY1	1.32458e-13	0.73581	0.518	0.414	3.13739e-09	ANKS6	4.39992e-16	0.643715	0.277	0.209	1.04216e-11	HIST2H2BF	1.7e-07	-0.848487	0.058	0.118	0.00401774
SH3KBP1	9.08755e-12	0.529944	0.469	0.398	2.15248e-07	CCDC153	2.9797e-07	-0.686618	0.007	0.047	0.00705772	OTX2	1.32962e-13	1.43786	0.064	0.008	3.14935e-09	ST8SIA3	4.72835e-16	0.542849	0.49	0.423	1.11996e-11	POU4F1-AS1	1.76e-07	-0.540691	0.019	0.057	0.00416641
CSGALNACT1	9.54112e-12	0.650608	0.296	0.216	2.25991e-07	RAB3C	2.98837e-07	0.786154	0.226	0.136	0.00707824	SYT17	1.47343e-13	1.02477	0.243	0.134	3.48997e-09	ST7	5.10005e-16	0.974939	0.301	0.233	1.208e-11	CNTNAP5	1.79e-07	0.572266	0.385	0.291	0.00422866
PHF1	9.76097e-12	-0.530007	0.185	0.265	2.31198e-07	FAM215A	3.09254e-07	0.613654	0.413	0.332	0.007325	BUB1	1.48985e-13	-0.84008	0.095	0.194	3.52886e-09	LRRTM2	5.11484e-16	0.764424	0.435	0.388	1.2115e-11	TMEM38A	1.8e-07	-0.727393	0.336	0.454	0.0042711
PDE10A	9.95488e-12	0.537009	0.103	0.05	2.35791e-07	C6orf141	3.12623e-07	-1.15559	0.008	0.049	0.00740478	PCDHA4	1.5675e-13	0.883439	0.147	0.059	3.71278e-09	TRIM51	5.14058e-16	-1.09123	0.021	0.061	1.2176e-11	NR4A3	1.82e-07	-0.587476	0.038	0.088	0.00430743
FXYD7	1.05861e-11	0.627053	0.164	0.098	2.50741e-07	CLCF1	3.13904e-07	-0.903427	0.005	0.041	0.00743512	DTX3	1.72595e-13	0.594926	0.441	0.334	4.08808e-09	VWDE	5.15201e-16	0.744849	0.091	0.045	1.2203e-11	FJX1	1.88e-07	-0.597915	0.06	0.121	0.00444644
PCDHB2	1.06376e-11	0.62279	0.444	0.366	2.51963e-07	SNAR-G1	3.20808e-07	1.16482	0.078	0.026	0.00759867	PCDHGA6	1.75094e-13	1.76741	0.153	0.066	4.14729e-09	PDE3A	5.51405e-16	0.922381	0.109	0.059	1.30606e-11	ABCC8	1.93e-07	-0.615396	0.375	0.469	0.00458318
GPSM1	1.12973e-11	0.550481	0.292	0.211	2.67588e-07	FAM108A1	3.25716e-07	-0.51234	0.1	0.184	0.0077149	SLC7A8	1.86126e-13	-0.621121	0.119	0.221	4.40859e-09	NHSL1	5.69409e-16	0.600409	0.361	0.292	1.3487e-11	FAM184B	1.97e-07	0.509825	0.328	0.242	0.00466951
B3GAT2	1.21682e-11	0.555234	0.118	0.061	2.88215e-07	DIO3	3.29889e-07	-3.00595	0.005	0.041	0.00781374	KAZALD1	2.3272e-13	-0.693133	0.019	0.076	5.51221e-09	SEPP1	5.81959e-16	1.08365	0.14	0.082	1.37843e-11	SEC61G	1.99e-07	-0.887647	0.434	0.495	0.00472155
BCAS1	1.27442e-11	1.60068	0.501	0.444	3.01858e-07	C20orf112	3.31194e-07	0.679047	0.779	0.72	0.00784466	RHOB	2.3384e-13	0.580426	0.557	0.439	5.53873e-09	TGFB2	6.11145e-16	0.802815	0.112	0.061	1.44756e-11	PCOLCE2	2.25e-07	0.879918	0.12	0.053	0.00532264
C1S	1.34489e-11	-1.01088	0.145	0.215	3.1855e-07	KCNH8	3.44917e-07	0.558668	0.193	0.11	0.0081697	TMEM132C	2.35455e-13	0.585396	0.095	0.026	5.57699e-09	PGM1	6.1964e-16	1.36404	0.234	0.17	1.46768e-11	SLC24A4	2.25e-07	-1.18284	0.812	0.851	0.0053326
HLA-DRB1	1.36707e-11	-1.14263	0.022	0.059	3.23805e-07	BTBD17	3.4989e-07	0.606509	0.216	0.127	0.00828749	ASS1	2.38629e-13	-1.09915	0.08	0.169	5.65217e-09	FRRS1L	6.41293e-16	0.76111	0.078	0.035	1.51897e-11	PPAP2A	2.27e-07	-0.595489	0.286	0.379	0.00536748
LDLRAD4	1.53487e-11	0.680748	0.292	0.216	3.63548e-07	TCEA3	4.014e-07	-0.633594	0.05	0.117	0.00950755	UNC5B	2.50406e-13	-0.54942	0.058	0.138	5.93111e-09	HSPA12A	6.46091e-16	0.743061	0.085	0.04	1.53033e-11	CDC25B	2.39e-07	-0.643885	0.308	0.407	0.00565482
CXCL2	1.58312e-11	-3.51732	0.02	0.057	3.74977e-07	CAV2	4.15061e-07	-0.965612	0.593	0.643	0.00983114	KCNF1	2.52514e-13	1.23534	0.097	0.027	5.98104e-09	FEZ1	6.68486e-16	0.73245	0.455	0.398	1.58338e-11	CNTN6	2.54e-07	0.760605	0.162	0.088	0.00600695
ADCYAP1	1.61741e-11	1.09092	0.049	0.013	3.83099e-07	LOC283174	3.08003e-27	1.07759	0.5	0.278	7.29535e-23	GPX3	2.62083e-13	-0.965159	0.074	0.164	6.20769e-09	NAP1L5	6.71417e-16	1.12364	0.166	0.106	1.59032e-11	GRHL3	2.62e-07	-0.577706	0.006	0.032	0.00620428
SAMD14	1.66855e-11	0.51066	0.168	0.101	3.95213e-07	LOC100506451	1.4715e-10	-0.59632	0.09	0.197	3.48538e-06	FAM110B	2.65756e-13	0.690958	0.547	0.434	6.29469e-09	RFTN2	7.1906e-16	0.977492	0.186	0.122	1.70317e-11	RHBDL3	2.66e-07	-0.65628	0.141	0.221	0.00629371
HIST1H4C	1.67256e-11	-0.917183	0.327	0.419	3.96162e-07	C4B-2	1.40086e-09	-0.615809	0.111	0.222	3.31808e-05	TCEA3	2.66656e-13	-0.716863	0.025	0.087	6.31602e-09	RAB30	8.65277e-16	0.820044	0.308	0.235	2.0495e-11	NRG3	2.75e-07	-0.591356	0.046	0.101	0.00651376
CELF4	1.86638e-11	0.908384	0.17	0.105	4.42071e-07	LOC254559	3.2106e-09	1.13876	0.429	0.324	7.60462e-05	SLC16A14	2.86187e-13	0.788213	0.262	0.15	6.77862e-09	RUFY2	8.66858e-16	0.984978	0.532	0.493	2.05324e-11	CXCR7	2.83e-07	-0.719611	0.096	0.167	0.00669798
WDR13	1.91965e-11	-0.69069	0.519	0.604	4.54689e-07							RASSF4	2.88211e-13	-0.573822	0.227	0.349	6.82656e-09	ELMO1	8.91774e-16	0.97406	0.344	0.278	2.11226e-11	HPR	2.84e-07	-0.90781	0.007	0.034	0.00672522
CNTN2	1.91974e-11	1.65757	0.186	0.12	4.54708e-07							LY6H	2.88456e-13	0.628213	0.287	0.174	6.83237e-09	TRIOBP	9.00407e-16	0.649138	0.722	0.709	2.1327e-11	ELAVL2	3.02e-07	0.79425	0.214	0.13	0.00715936
CCDC144A	2.31733e-11	0.607917	0.402	0.325	5.48882e-07							SLC2A12	2.97562e-13	-1.41941	0.065	0.148	7.04806e-09	RIMS1	9.2784e-16	0.667653	0.083	0.039	2.19768e-11	WDR17	3.22e-07	0.554359	0.785	0.776	0.00762254
SIM2	2.45131e-11	0.732746	0.236	0.162	5.80618e-07							UBE2T	3.01849e-13	-0.639576	0.223	0.343	7.14959e-09	DNER	1.0174e-15	1.21774	0.046	0.015	2.40982e-11	ALKBH4	3.23e-07	-0.658201	0.519	0.608	0.00764254
NEFL	2.46592e-11	0.929801	0.091	0.042	5.84077e-07							BOC	3.08179e-13	-0.980627	0.268	0.382	7.29954e-09	FAM155A	1.04131e-15	0.608233	0.225	0.155	2.46644e-11	SLC9B2	3.33e-07	0.609771	0.219	0.135	0.00789807
ST8SIA5	2.47667e-11	0.560841	0.228	0.153	5.86623e-07							UBTD1	3.16764e-13	-0.55735	0.035	0.105	7.50287e-09	FAM89A	1.04392e-15	-0.571221	0.048	0.1	2.47262e-11	GPR146	3.34e-07	-1.3301	0.051	0.104	0.00791633
STOM	2.48696e-11	-0.953931	0.472	0.538	5.89061e-07							SQRDL	3.29692e-13	-1.0728	0.018	0.074	7.80909e-09	YPEL4	1.06663e-15	0.670185	0.107	0.057	2.52642e-11	DUSP6	3.39e-07	0.595253	0.379	0.293	0.00803628
PMAIP1	2.66696e-11	-0.785468	0.016	0.049	6.31696e-07							OLFM2	3.41282e-13	0.863278	0.512	0.419	8.08361e-09	SPHK1	1.09041e-15	0.891483	0.082	0.038	2.58275e-11	IBTK	3.53e-07	0.535575	0.443	0.344	0.00835223
RGCC	2.8137e-11	0.894276	0.137	0.078	6.66452e-07							PLA2G5	3.94282e-13	-1.03353	0.012	0.062	9.33896e-09	GRM4	1.21865e-15	0.779328	0.053	0.019	2.8865e-11	FUT8	3.55e-07	0.515685	0.308	0.216	0.00841014
KCNIP1	2.92229e-11	1.10445	0.258	0.188	6.92174e-07							DNAJB5	3.97914e-13	0.736158	0.504	0.386	9.42498e-09	KIAA1377	1.54307e-15	0.652049	0.468	0.427	3.65491e-11	PLK5	3.64e-07	-0.72161	0.028	0.073	0.00861819
CTSH	3.20452e-11	-0.70974	0.037	0.081	7.59023e-07							PPP1R9A	3.99844e-13	0.603491	0.618	0.518	9.4707e-09	EDN2	1.63743e-15	-1.11133	0.008	0.038	3.87842e-11	SYNPR	3.67e-07	1.17132	0.066	0.018	0.00869247
ATP1B1	3.39488e-11	0.583067	0.522	0.453	8.04112e-07							ACOX2	4.0164e-13	-1.14892	0.014	0.067	9.51325e-09	RIT2	1.70585e-15	1.69705	0.026	0.005	4.04048e-11	FKBP7	3.91e-07	0.655612	0.182	0.104	0.009258
NUPL2	3.52894e-11	0.538953	0.574	0.511	8.35865e-07							CD200	4.38023e-13	0.707321	0.417	0.292	1.0375e-08	TRIM36	1.8089e-15	0.689807	0.276	0.207	4.28455e-11	HTR5A	3.94e-07	-0.717946	0.012	0.043	0.00934187
HIST1H1B	3.66637e-11	-0.61319	0.061	0.114	8.68416e-07							AFAP1	4.81729e-13	0.770209	0.546	0.453	1.14102e-08	BCHE	1.8392e-15	1.18779	0.087	0.043	4.35633e-11	ACOT1	4.13e-07	-0.836373	0.142	0.22	0.00977148
PCDHA4	3.71209e-11	0.742958	0.169	0.103	8.79247e-07							ACSBG1	4.82138e-13	-0.991467	0.028	0.091	1.14199e-08	GOLGA8I	1.88007e-15	0.688449	0.182	0.121	4.45314e-11	GSTM4	4.19e-07	-0.601339	0.124	0.201	0.00993085
TGM2	4.04899e-11	-1.70395	0.007	0.032	9.59044e-07							NKTR	5.01817e-13	0.615347	0.752	0.716	1.1886e-08	RRAD	1.94447e-15	1.09487	0.04	0.012	4.60568e-11	LOC349196	2.39e-20	0.666472	0.715	0.608	5.65e-16
TRIB3	4.38339e-11	-1.60935	0.085	0.142	1.03825e-06							PPP1R15A	5.22033e-13	0.725929	0.556	0.481	1.23649e-08	HSPA2	2.09639e-15	-0.759709	0.049	0.101	4.96551e-11	LOC283174	3.96e-19	0.907166	0.358	0.19	9.38e-15
TMEM214	4.46971e-11	-0.566011	0.279	0.37	1.05869e-06							MANEAL	5.40512e-13	0.661128	0.679	0.617	1.28026e-08	MAGEA6	2.1707e-15	0.559261	0.084	0.152	5.14151e-11	LOC91948	1.77e-18	-0.737656	0.811	0.729	4.19e-14
GINS1	4.64642e-11	-0.503122	0.359	0.432	1.10055e-06							TAF1C	5.60709e-13	0.618087	0.614	0.542	1.3281e-08	CDH18	2.33624e-15	0.798116	0.432	0.378	5.53362e-11	FLJ35946	2.3e-16	0.880283	0.309	0.156	5.46e-12
GNG3	4.66706e-11	1.43436	0.151	0.092	1.10544e-06							GABPB1-AS1	5.69188e-13	0.75398	0.748	0.698	1.34818e-08	TSPYL2	2.71315e-15	0.74969	0.391	0.33	6.42636e-11	LOC440297	3.56e-10	0.530154	0.372	0.257	8.43e-06
E2F8	4.70438e-11	-0.511251	0.078	0.134	1.11428e-06							NRP1	6.03683e-13	-0.798459	0.095	0.188	1.42988e-08	CPE	2.92688e-15	0.520596	0.669	0.625	6.93261e-11	FLJ39051	5.23e-09	-0.801931	0.037	0.094	0.000123766
GRIN2B	4.70566e-11	0.683859	0.09	0.042	1.11458e-06							PTK2B	6.0744e-13	-0.591092	0.095	0.19	1.43878e-08	GFI1B	2.9379e-15	-0.802908	0.016	0.052	6.95872e-11
ITGBL1	4.94137e-11	0.590102	0.149	0.087	1.17041e-06							BCL2L2-PABPN1	6.1117e-13	0.53974	0.733	0.669	1.44762e-08	MYO5A	3.0085e-15	0.557685	0.493	0.435	7.12593e-11
FAM72B	5.37162e-11	-0.601173	0.056	0.106	1.27232e-06							RIC3	6.13998e-13	0.644875	0.58	0.487	1.45432e-08	CLEC2B	3.02156e-15	-1.00297	0.008	0.038	7.15688e-11
KCNK2	5.38075e-11	0.763764	0.083	0.037	1.27448e-06							MTHFD2	6.52925e-13	-0.608313	0.384	0.499	1.54652e-08	SLC24A2	3.03595e-15	0.744954	0.416	0.343	7.19095e-11
CAV1	5.72884e-11	-1.39617	0.077	0.132	1.35693e-06							HEY2	6.62996e-13	1.35799	0.078	0.017	1.57037e-08	GRIA1	3.04987e-15	1.05934	0.152	0.095	7.22392e-11
AMZ1	5.7493e-11	0.671078	0.206	0.137	1.36178e-06							MIDN	6.75355e-13	0.527519	0.567	0.491	1.59965e-08	CCSER1	3.0662e-15	0.808242	0.367	0.302	7.2626e-11
ADD2	5.78314e-11	0.573445	0.437	0.365	1.36979e-06							HNRNPA0	6.89461e-13	0.610994	0.765	0.75	1.63306e-08	SESN3	3.16253e-15	0.743525	0.39	0.323	7.49077e-11
SLC2A3	5.796e-11	-0.75329	0.395	0.471	1.37284e-06							B4GALNT4	7.14493e-13	0.504969	0.509	0.393	1.69235e-08	TUBA3FP	3.48274e-15	0.609809	0.608	0.573	8.24921e-11
NR1D1	6.1668e-11	-0.560891	0.136	0.206	1.46067e-06							PARP9	7.17803e-13	-0.797047	0.208	0.315	1.70019e-08	RAB6A	3.49429e-15	0.761906	0.708	0.713	8.27657e-11
CRABP2	6.78674e-11	-1.01289	0.055	0.104	1.60751e-06							TCN2	7.95514e-13	0.697712	0.183	0.087	1.88425e-08	TMEM176B	3.91298e-15	-0.947126	0.154	0.224	9.26828e-11
TMEM169	6.80266e-11	0.859554	0.308	0.234	1.61128e-06							FZD5	8.0041e-13	-1.10339	0.147	0.255	1.89585e-08	KCNA3	4.21177e-15	1.08074	0.06	0.024	9.97601e-11
SNX10	7.9377e-11	0.814591	0.295	0.222	1.88012e-06							APBA2	8.303e-13	0.565946	0.625	0.507	1.96665e-08	BST2	4.32957e-15	-1.26638	0.003	0.027	1.0255e-10
FKBP9L	8.44114e-11	-0.908956	0.384	0.476	1.99937e-06							SUSD1	8.58746e-13	0.903448	0.187	0.091	2.03403e-08	CROCCP3	4.45075e-15	0.621127	0.709	0.675	1.0542e-10
SLC32A1	8.67881e-11	0.548975	0.053	0.017	2.05566e-06							CAPG	9.34811e-13	-0.719618	0.028	0.091	2.21419e-08	LCA5	4.73498e-15	0.565351	0.172	0.109	1.12153e-10
LRRTM1	1.03431e-10	0.664285	0.125	0.069	2.44986e-06							SRRM3	1.05552e-12	0.533225	0.177	0.083	2.50011e-08	FBXO44	5.12943e-15	0.647154	0.585	0.538	1.21496e-10
LRP8	1.0357e-10	0.528571	0.314	0.237	2.45317e-06							GPR85	1.0853e-12	0.625806	0.25	0.143	2.57064e-08	C20orf194	5.1699e-15	0.717076	0.397	0.329	1.22454e-10
ACVR2A	1.09964e-10	0.667315	0.466	0.393	2.60462e-06							DSCAM-AS1	1.0909e-12	0.847869	0.206	0.114	2.5839e-08	PTPRN	5.17986e-15	0.888411	0.329	0.261	1.2269e-10
KIAA0101	1.10989e-10	-0.516564	0.443	0.511	2.62888e-06							CALCOCO1	1.18108e-12	0.680497	0.657	0.591	2.7975e-08	BACH2	5.87212e-15	0.595569	0.229	0.161	1.39087e-10
FAM117B	1.11525e-10	0.669071	0.679	0.647	2.64158e-06							TRIM24	1.1893e-12	0.744119	0.476	0.362	2.81698e-08	CACNA2D2	5.95341e-15	0.653347	0.195	0.132	1.41012e-10
C2orf80	1.15592e-10	0.733082	0.294	0.225	2.73791e-06							JMY	1.37926e-12	0.589919	0.437	0.32	3.26691e-08	PSD2	6.01682e-15	0.77675	0.137	0.081	1.42514e-10
TSLP	1.20152e-10	-0.9474	0.005	0.027	2.84591e-06							PHACTR1	1.50399e-12	0.669946	0.306	0.194	3.56235e-08	IFITM10	6.20817e-15	0.595297	0.099	0.053	1.47047e-10
CSF1	1.20157e-10	-0.623012	0.143	0.216	2.84604e-06							USP54	1.55332e-12	0.580692	0.758	0.685	3.6792e-08	TRIM55	6.70593e-15	-0.551198	0.01	0.04	1.58837e-10
ZNF804A	1.24694e-10	0.547549	0.101	0.05	2.95351e-06							PRUNE2	1.62093e-12	0.528235	0.389	0.269	3.83933e-08	ELAVL2	6.86976e-15	1.20956	0.392	0.338	1.62717e-10
GPR155	1.35017e-10	0.516545	0.903	0.885	3.19802e-06							MANBA	1.64843e-12	-0.527486	0.117	0.216	3.90447e-08	SPARCL1	7.13389e-15	-0.85839	0.041	0.089	1.68973e-10
NIN	1.39471e-10	0.506845	0.537	0.478	3.30351e-06							FEV	1.76703e-12	0.703748	0.058	0.008	4.18538e-08	GPR61	7.66623e-15	-0.590846	0.017	0.053	1.81582e-10
PDZRN4	1.48404e-10	0.960097	0.102	0.052	3.51509e-06							FAM19A5	1.80725e-12	0.697474	0.419	0.311	4.28064e-08	GABRA2	8.19837e-15	1.10078	0.128	0.075	1.94187e-10
TMPRSS5	1.63361e-10	0.555627	0.221	0.15	3.86937e-06							ITPK1	1.98423e-12	0.782512	0.735	0.694	4.69984e-08	COL6A1	8.31831e-15	0.528925	0.405	0.333	1.97028e-10
SLPI	1.8541e-10	-0.679989	0.015	0.045	4.39161e-06							TRO	1.99289e-12	0.64692	0.642	0.57	4.72037e-08	CALD1	8.50849e-15	0.552811	0.65	0.617	2.01532e-10
TRIB1	1.90912e-10	-0.726901	0.141	0.211	4.52194e-06							KIF3A	2.02373e-12	0.595463	0.889	0.857	4.7934e-08	EPB41L4A	9.43327e-15	1.06669	0.433	0.372	2.23436e-10
F13A1	1.95563e-10	-3.98794	0.004	0.025	4.6321e-06							BST2	2.0395e-12	-1.39322	0.012	0.061	4.83076e-08	SPDYE8P	9.76624e-15	0.585716	0.649	0.641	2.31323e-10
RIBC1	2.0356e-10	-0.527397	0.021	0.056	4.82152e-06							REPS2	2.09577e-12	0.679045	0.499	0.398	4.96404e-08	CBLN4	1.06208e-14	1.95979	0.042	0.013	2.51565e-10
KCNIP3	2.0928e-10	0.871307	0.1	0.051	4.957e-06							DND1	2.18143e-12	0.851928	0.304	0.201	5.16692e-08	PCDHGC3	1.06552e-14	0.627476	0.358	0.294	2.5238e-10
NRSN1	2.16051e-10	0.875217	0.23	0.161	5.11738e-06							EPB41L1	2.766e-12	0.754941	0.435	0.337	6.55156e-08	GRM1	1.16881e-14	0.630603	0.17	0.11	2.76843e-10
BIRC3	2.17682e-10	-1.13301	0.016	0.047	5.15602e-06							CRYGD	2.77301e-12	0.750287	0.23	0.126	6.56816e-08	DLX1	1.18062e-14	1.36495	0.081	0.04	2.79641e-10
CA8	2.23949e-10	1.0166	0.204	0.138	5.30446e-06							MIR568	2.83477e-12	0.666595	0.23	0.132	6.71442e-08	SYNC	1.28578e-14	0.694859	0.157	0.098	3.04549e-10
MYH10	2.40655e-10	0.522416	0.663	0.613	5.70016e-06							KIAA1683	2.98897e-12	1.11655	0.317	0.206	7.07967e-08	REM2	1.36041e-14	0.949478	0.093	0.048	3.22226e-10
HLA-DRA	2.56642e-10	-1.16169	0.054	0.101	6.07883e-06							TCEAL6	3.0306e-12	0.786635	0.243	0.139	7.17827e-08	CCIN	1.40837e-14	-0.562183	0.009	0.039	3.33587e-10
NRN1	3.03521e-10	-1.29799	0.331	0.405	7.18921e-06							KITLG	3.14523e-12	-0.671291	0.045	0.117	7.44978e-08	SSBP2	1.43072e-14	0.55161	0.609	0.554	3.38879e-10
TIMM17B	3.03846e-10	-0.551987	0.436	0.527	7.1969e-06							ABCG1	3.20509e-12	1.01255	0.193	0.099	7.59157e-08	GRIK4	1.469e-14	0.917821	0.142	0.088	3.47946e-10
BTD	3.39989e-10	0.675361	0.195	0.129	8.05299e-06							RPSAP58	3.34721e-12	0.569488	0.808	0.848	7.92821e-08	NRG3	1.57029e-14	0.592498	0.052	0.02	3.71939e-10
MXD3	3.53388e-10	-0.637333	0.156	0.223	8.37034e-06							SCN1B	3.45796e-12	-1.12161	0.036	0.102	8.19052e-08	SHROOM2	1.62736e-14	1.18105	0.208	0.15	3.85458e-10
SLC18A3	3.63865e-10	-0.65824	0.004	0.023	8.6185e-06							HAS2	3.54936e-12	-1.00987	0.307	0.414	8.40701e-08	BASP1	1.69683e-14	0.590289	0.574	0.526	4.01912e-10
CASP1	3.98198e-10	-0.552117	0.065	0.116	9.43172e-06							FOLR1	3.55406e-12	-1.21229	0.007	0.049	8.41814e-08	FAXC	1.72076e-14	0.685358	0.207	0.144	4.07579e-10
PCDHB16	4.48597e-10	0.719753	0.597	0.548	1.06255e-05							ENPP1	4.2396e-12	-0.92103	0.572	0.634	1.00419e-07	PCDHGC4	1.77551e-14	0.935052	0.146	0.091	4.20548e-10
B3GALT2	4.57511e-10	0.85668	0.193	0.13	1.08366e-05							WNK3	4.65687e-12	0.592904	0.57	0.467	1.10303e-07	FAM72D	1.88787e-14	-0.535137	0.028	0.069	4.47162e-10
ERV3-1	4.71638e-10	0.688935	0.546	0.484	1.11712e-05							RNF182	4.697e-12	0.517553	0.569	0.456	1.11253e-07	FABP3	2.20255e-14	1.28329	0.095	0.051	5.21696e-10
SHCBP1	4.74881e-10	-0.557918	0.187	0.255	1.1248e-05							PRELP	5.23804e-12	-1.4264	0.564	0.641	1.24068e-07	NEUROD1	2.23112e-14	0.664492	0.683	0.661	5.28462e-10
PCDH20	5.12818e-10	1.17219	0.057	0.021	1.21466e-05							RMST	5.97983e-12	-0.541748	0.147	0.252	1.41638e-07	MATK	2.24966e-14	-0.516615	0.013	0.045	5.32854e-10
HIST1H3B	5.16544e-10	-0.88557	0.048	0.092	1.22349e-05							SLC38A5	6.16769e-12	0.771913	0.18	0.088	1.46088e-07	KCNT2	2.35887e-14	0.754379	0.142	0.088	5.58722e-10
CDH5	5.22688e-10	-0.743708	0.02	0.052	1.23804e-05							TRPS1	6.41278e-12	-0.625193	0.398	0.516	1.51893e-07	ZNF117	2.66525e-14	0.620717	0.651	0.61	6.31292e-10
C8orf22	5.35476e-10	-2.98899	0.004	0.024	1.26833e-05							ASAP1	6.49987e-12	0.744713	0.759	0.731	1.53956e-07	NBPF16	2.69023e-14	0.527217	0.537	0.501	6.37207e-10
FAM89A	5.36209e-10	0.689019	0.073	0.032	1.27006e-05							KIF2C	6.73277e-12	-0.748333	0.104	0.198	1.59472e-07	DMRTA1	2.71348e-14	1.24138	0.088	0.045	6.42715e-10
ABHD6	5.59685e-10	0.560354	0.255	0.184	1.32567e-05							LIMA1	6.78206e-12	0.580665	0.736	0.688	1.6064e-07	PAK6	2.86934e-14	0.773318	0.057	0.023	6.79631e-10
PPAPDC1A	5.93445e-10	0.646881	0.076	0.034	1.40563e-05							BCAT1	7.15233e-12	0.652476	0.587	0.487	1.6941e-07	ZDHHC11	2.90551e-14	1.07005	0.16	0.104	6.88198e-10
SLC17A6	6.01195e-10	0.774697	0.041	0.011	1.42399e-05							CCL2	7.61582e-12	-2.61845	0.018	0.07	1.80388e-07	PDE5A	3.16391e-14	0.797284	0.252	0.19	7.49404e-10
ARMCX1	6.19228e-10	0.614059	0.404	0.334	1.4667e-05							EVL	8.07167e-12	0.625232	0.352	0.242	1.91186e-07	RNF165	3.38439e-14	0.972495	0.426	0.374	8.01627e-10
IL1A	6.20202e-10	-0.596404	0.007	0.03	1.46901e-05							SDSL	8.08938e-12	-0.720748	0.159	0.258	1.91605e-07	TLCD1	3.49016e-14	-0.599976	0.017	0.052	8.26678e-10
SUSD5	6.2684e-10	0.914735	0.259	0.195	1.48473e-05							RRN3P2	8.38978e-12	0.872366	0.376	0.276	1.9872e-07	ABI2	3.53332e-14	0.506459	0.856	0.849	8.36903e-10
HOXD3	6.4226e-10	0.741502	0.115	0.064	1.52126e-05							ACTC1	8.50889e-12	0.51113	0.178	0.087	2.01541e-07	SERINC2	3.59203e-14	0.645736	0.099	0.053	8.50809e-10
RAB9B	6.43968e-10	0.709973	0.196	0.131	1.5253e-05							CSNK1E	8.57769e-12	0.511	0.756	0.743	2.03171e-07	PRKAG2	3.88329e-14	0.794563	0.234	0.166	9.19796e-10
SHC3	6.44934e-10	0.644388	0.318	0.251	1.52759e-05							CAMK2B	8.98355e-12	0.643002	0.186	0.095	2.12784e-07	BCAR1	4.06512e-14	0.910512	0.272	0.206	9.62863e-10
SEZ6	6.86945e-10	0.906021	0.438	0.37	1.6271e-05							BEX5	9.00051e-12	1.12785	0.154	0.07	2.13186e-07	SLC44A3	5.16638e-14	1.30291	0.062	0.027	1.22371e-09
C21orf7	6.99146e-10	-0.699393	0.05	0.096	1.656e-05							PHLDA2	1.00008e-11	-0.940667	0.012	0.058	2.36879e-07	VAT1L	5.34004e-14	1.08065	0.298	0.232	1.26484e-09
LPAR4	7.02416e-10	0.606573	0.069	0.029	1.66374e-05							HMGB2	1.00779e-11	-0.578788	0.33	0.444	2.38705e-07	NKAIN1	5.41416e-14	0.871717	0.211	0.151	1.2824e-09
KBTBD6	7.06469e-10	0.585761	0.764	0.744	1.67334e-05							USP4	1.02158e-11	0.639667	0.784	0.736	2.41972e-07	HSD17B2	5.87812e-14	-0.807745	0.026	0.066	1.39229e-09
KIF19	8.54671e-10	0.67544	0.094	0.048	2.02437e-05							NHSL1	1.02556e-11	0.639361	0.626	0.54	2.42915e-07	ABCG1	6.39556e-14	0.890626	0.118	0.068	1.51485e-09
ST3GAL6	9.66658e-10	0.511022	0.411	0.34	2.28963e-05							PCDHA12	1.05617e-11	0.998874	0.131	0.055	2.50164e-07	ELOVL4	6.54204e-14	0.978224	0.123	0.072	1.54955e-09
CACFD1	9.87011e-10	0.539705	0.346	0.275	2.33784e-05							CPEB4	1.07359e-11	0.553736	0.665	0.597	2.54291e-07	ANKRD35	6.6089e-14	0.570177	0.044	0.015	1.56538e-09
PCDHB10	1.04881e-09	0.700884	0.425	0.349	2.48421e-05							IFITM3	1.20966e-11	-1.81599	0.105	0.193	2.86519e-07	DAAM1	6.66952e-14	0.824691	0.507	0.466	1.57974e-09
ZNF195	1.1324e-09	0.555947	0.616	0.558	2.68219e-05							DGKI	1.23375e-11	0.514114	0.364	0.243	2.92225e-07	METRN	6.77564e-14	0.608148	0.082	0.041	1.60488e-09
ZCCHC24	1.13345e-09	0.714331	0.458	0.398	2.68469e-05							PDGFRB	1.26109e-11	-0.567753	0.064	0.143	2.98703e-07	CACNG4	8.04059e-14	0.695977	0.052	0.02	1.90449e-09
TF	1.13896e-09	0.828247	0.122	0.069	2.69774e-05							SDCBP2	1.2619e-11	0.966694	0.231	0.134	2.98893e-07	DLX2	8.05104e-14	1.2218	0.075	0.036	1.90697e-09
ME3	1.25982e-09	0.681061	0.273	0.205	2.98401e-05							NT5DC2	1.55398e-11	0.700484	0.501	0.419	3.68075e-07	NCDN	8.66948e-14	0.970792	0.449	0.409	2.05345e-09
OTUD5	1.29494e-09	-0.578704	0.449	0.526	3.06719e-05							LPAR2	1.70524e-11	0.831936	0.156	0.071	4.03902e-07	NGB	8.94186e-14	0.916779	0.035	0.01	2.11797e-09
ZC4H2	1.47287e-09	0.551289	0.26	0.189	3.48863e-05							NTSR1	1.80517e-11	-0.501545	0.027	0.084	4.27574e-07	TCP10L	9.62947e-14	1.13945	0.081	0.04	2.28084e-09
GPR85	1.52377e-09	0.790485	0.097	0.052	3.60919e-05							TMEM100	1.85468e-11	1.13144	0.23	0.135	4.39299e-07	DSTYK	1.10082e-13	0.744655	0.753	0.731	2.60741e-09
FAM19A5	1.54284e-09	0.589608	0.209	0.146	3.65436e-05							CHRM1	1.90948e-11	0.927911	0.19	0.102	4.52279e-07	TSC1	1.105e-13	0.556736	0.573	0.543	2.6173e-09
TNFAIP8	1.57434e-09	-0.723977	0.006	0.027	3.72899e-05							CAMK1D	1.9372e-11	0.515086	0.693	0.648	4.58846e-07	OR4N4	1.11099e-13	1.33797	0.022	0.004	2.63149e-09
ACTL6B	1.67465e-09	0.534669	0.173	0.11	3.96657e-05							THBS4	1.9737e-11	0.55256	0.596	0.5	4.6749e-07	HIST1H3G	1.1639e-13	-0.507178	0.018	0.053	2.75681e-09
LINC00689	1.8287e-09	0.590917	0.268	0.198	4.33147e-05							MT1M	2.03912e-11	1.05849	0.18	0.093	4.82986e-07	OPTN	1.17883e-13	1.07724	0.257	0.196	2.79217e-09
GABRB3	2.04021e-09	0.560446	0.148	0.092	4.83244e-05							PDE8B	2.35115e-11	0.70127	0.26	0.161	5.56892e-07	GPR161	1.3392e-13	0.750119	0.581	0.543	3.17204e-09
GAS5	2.04024e-09	-0.559108	0.699	0.763	4.83252e-05							SLCO4A1	2.50306e-11	-0.875241	0.121	0.211	5.92875e-07	NELL1	1.33959e-13	1.34955	0.074	0.035	3.17296e-09
SERPING1	2.41388e-09	-0.794244	0.159	0.224	5.71751e-05							PELI2	2.68612e-11	0.905742	0.224	0.129	6.36235e-07	PJA1	1.41848e-13	0.834344	0.419	0.382	3.35981e-09
DLX6-AS1	2.42527e-09	1.47395	0.492	0.443	5.7445e-05							BCAM	2.82385e-11	-0.717927	0.073	0.15	6.68857e-07	KIAA0922	1.45977e-13	1.00971	0.156	0.101	3.45761e-09
DDIT4L	2.57304e-09	-1.16961	0.012	0.038	6.0945e-05							CACNB4	2.82582e-11	0.645365	0.348	0.241	6.69323e-07	SPAST	1.52879e-13	0.583349	0.83	0.817	3.6211e-09
ZKSCAN7	2.69221e-09	0.636852	0.557	0.5	6.37677e-05							STAT2	2.84177e-11	-0.630383	0.783	0.819	6.73103e-07	SYNPO2	1.54717e-13	0.702171	0.513	0.479	3.66464e-09
GPX3	2.71556e-09	-1.18235	0.058	0.103	6.43207e-05							DSTYK	2.89948e-11	-0.559502	0.842	0.86	6.86771e-07	BEX4	1.70579e-13	0.510419	0.685	0.74	4.04034e-09
FOXP2	2.7221e-09	0.638566	0.136	0.082	6.44758e-05							DCAF16	3.08645e-11	0.514655	0.857	0.826	7.31058e-07	SERPINI1	1.75523e-13	1.49118	0.079	0.04	4.15745e-09
CAPN5	2.81487e-09	0.57998	0.575	0.509	6.6673e-05							BHLHE41	3.11821e-11	-0.506767	0.066	0.142	7.3858e-07	CALB1	1.8135e-13	-2.31145	0.027	0.065	4.29545e-09
SLC4A10	3.11295e-09	0.608458	0.138	0.085	7.37334e-05							ALDOC	3.2822e-11	-0.546305	0.275	0.402	7.77422e-07	OTOR	1.91165e-13	1.38903	0.068	0.032	4.52793e-09
MYBPHL	3.34896e-09	-0.514066	0.036	0.073	7.93235e-05							G0S2	3.32429e-11	1.05969	0.124	0.051	7.87392e-07	FAM49A	1.98431e-13	0.548562	0.072	0.034	4.70003e-09
PCDHB4	3.38042e-09	0.692069	0.226	0.164	8.00686e-05							PCF11	3.44787e-11	0.540807	0.604	0.523	8.16662e-07	CNGB3	2.07675e-13	-0.685521	0.007	0.033	4.91899e-09
PLAU	3.42642e-09	-0.841367	0.073	0.122	8.11583e-05							PCDHGA10	3.52122e-11	0.569186	0.203	0.111	8.34037e-07	IFIT3	2.23229e-13	0.676844	0.525	0.487	5.2874e-09
SIRT2	3.46818e-09	1.05072	0.654	0.642	8.21472e-05							SPSB4	3.54305e-11	0.809477	0.243	0.144	8.39207e-07	PCDH1	2.31972e-13	0.588791	0.093	0.05	5.49449e-09
LDLRAD3	3.56176e-09	0.506986	0.696	0.655	8.43637e-05							RAB11B	3.58741e-11	0.569617	0.698	0.707	8.49714e-07	RNF122	2.49983e-13	0.623219	0.439	0.38	5.9211e-09
KIRREL3	3.58952e-09	0.694533	0.13	0.079	8.50213e-05							LRRC37A2	3.63376e-11	0.78527	0.483	0.407	8.60693e-07	KCNMB4	2.5011e-13	0.569356	0.46	0.406	5.9241e-09
FSD1	3.72234e-09	0.592143	0.318	0.252	8.81672e-05							SP7	3.63713e-11	-1.42076	0.007	0.046	8.61491e-07	DHRS3	2.85605e-13	-1.67245	0.005	0.029	6.76483e-09
SPSB4	3.73437e-09	0.557367	0.321	0.254	8.84523e-05							KLF3	3.6469e-11	0.734556	0.462	0.352	8.63805e-07	SCG3	2.87023e-13	0.516845	0.804	0.818	6.79842e-09
HLA-DRB5	3.96893e-09	-0.873447	0.012	0.038	9.4008e-05							MLL3	3.73375e-11	0.537319	0.827	0.82	8.84377e-07	RBP7	3.29064e-13	-0.889706	0.004	0.027	7.79422e-09
H2AFY2	3.97329e-09	0.737976	0.191	0.134	9.41114e-05							ZNF527	3.91699e-11	0.624481	0.738	0.672	9.27779e-07	HPGD	3.30352e-13	-1.87101	0.008	0.035	7.82471e-09
FRAS1	4.14891e-09	0.642846	0.069	0.031	9.82712e-05							BAI3	4.01132e-11	0.502265	0.482	0.382	9.50121e-07	SCAMP5	3.47033e-13	0.741517	0.282	0.219	8.21983e-09
TOX	4.15433e-09	0.618583	0.277	0.21	9.83995e-05							PLS1	4.21226e-11	-0.533676	0.062	0.136	9.97715e-07	S100B	3.47489e-13	1.04122	0.068	0.032	8.23063e-09
LMCD1-AS1	4.20056e-09	0.554405	0.179	0.121	9.94944e-05							ZNF714	4.40764e-11	0.619194	0.864	0.828	1.04399e-06	ZKSCAN1	3.61461e-13	0.548272	0.841	0.831	8.56156e-09
DNAH11	4.37408e-09	-0.547753	0.184	0.249	0.000103605							TPTE2P1	4.48533e-11	0.586805	0.696	0.642	1.06239e-06	CYBA	3.76759e-13	-0.539957	0.04	0.084	8.92391e-09
TUBA4A	4.45307e-09	-0.786528	0.031	0.066	0.000105475							SOX15	4.60507e-11	0.631713	0.242	0.145	1.09076e-06	TMEM196	4.34362e-13	1.01979	0.076	0.037	1.02883e-08
CNTNAP2	4.49237e-09	0.575273	0.191	0.136	0.000106406							TUB	4.85856e-11	0.590356	0.596	0.514	1.1508e-06	GOLGA8EP	4.71414e-13	1.00307	0.07	0.034	1.11659e-08
ZNF649	5.07646e-09	0.59107	0.443	0.367	0.000120241							GPHN	4.93399e-11	0.830299	0.384	0.282	1.16866e-06	MBD5	5.42949e-13	0.712337	0.391	0.338	1.28603e-08
CHGA	5.49055e-09	0.784601	0.072	0.034	0.000130049							SLC44A3	5.10089e-11	-0.895438	0.018	0.066	1.2082e-06	KIAA1462	5.74986e-13	0.570266	0.182	0.125	1.36191e-08
KCNIP4	5.66133e-09	0.800688	0.219	0.155	0.000134094							NAV1	5.11171e-11	0.519651	0.92	0.906	1.21076e-06	SOX15	5.8069e-13	0.53198	0.171	0.114	1.37542e-08
LY96	5.76973e-09	-0.554858	0.025	0.057	0.000136662							MMP14	5.15785e-11	-0.61619	0.129	0.218	1.22169e-06	APC	5.97742e-13	0.952618	0.448	0.402	1.41581e-08
RGS7BP	6.00147e-09	0.578965	0.099	0.054	0.000142151							ART3	5.34397e-11	2.56778	0.064	0.013	1.26577e-06	RASD1	6.44093e-13	0.517961	0.388	0.324	1.5256e-08
EFNA2	6.17613e-09	0.555	0.283	0.217	0.000146288							PTPRJ	5.73662e-11	0.550871	0.794	0.771	1.35878e-06	ARHGAP36	6.5143e-13	1.94383	0.026	0.006	1.54298e-08
C7orf41	6.36562e-09	0.648658	0.248	0.184	0.000150776							ZNF286B	5.7745e-11	0.583226	0.737	0.695	1.36775e-06	RGS11	6.66926e-13	0.870535	0.103	0.059	1.57968e-08
PLXNA3	6.68481e-09	0.552391	0.473	0.412	0.000158336							CREBZF	5.78877e-11	0.672287	0.639	0.601	1.37113e-06	KIRREL	7.20084e-13	0.6966	0.109	0.063	1.70559e-08
FAM84B	7.07479e-09	0.657218	0.697	0.666	0.000167573							SLC35F1	5.78993e-11	0.738015	0.807	0.753	1.3714e-06	PAGE2B	7.40245e-13	1.33914	0.026	0.006	1.75334e-08
MEIS2	7.08318e-09	0.755294	0.356	0.287	0.000167772							KCNK10	5.79604e-11	0.633631	0.11	0.042	1.37285e-06	CAMK2D	7.528e-13	0.772952	0.517	0.484	1.78308e-08
POLR2B	8.05385e-09	0.899989	0.657	0.639	0.000190763							UNC5C	5.82644e-11	0.715992	0.215	0.122	1.38005e-06	REEP5	8.04543e-13	0.649255	0.579	0.563	1.90564e-08
FTH1	8.30006e-09	-0.654535	0.988	0.997	0.000196595							MAPK8IP2	6.56298e-11	0.505143	0.148	0.07	1.55451e-06	MITF	8.15407e-13	-0.810817	0.017	0.048	1.93137e-08
SLC17A8	8.58931e-09	1.14342	0.037	0.01	0.000203447							RGS7BP	6.58837e-11	0.58495	0.132	0.057	1.56052e-06	ACSL1	8.27639e-13	0.895066	0.204	0.144	1.96034e-08
PCDHA6	8.84077e-09	0.677477	0.079	0.039	0.000209403							TSPYL2	7.01981e-11	0.710664	0.39	0.275	1.66271e-06	PURG	8.74503e-13	0.929011	0.102	0.058	2.07135e-08
BTBD17	8.97844e-09	0.770166	0.304	0.239	0.000212663							AASDHPPT	7.20747e-11	0.60015	0.738	0.7	1.70716e-06	MAPKBP1	9.48292e-13	0.641312	0.513	0.461	2.24612e-08
SLC16A14	9.03111e-09	0.738688	0.153	0.098	0.000213911							TRPC4	7.30051e-11	0.764558	0.163	0.08	1.7292e-06	KIAA0319	9.50548e-13	0.660643	0.082	0.042	2.25147e-08
PTPN4	1.07558e-08	0.52334	0.347	0.286	0.000254761							LRP6	7.30166e-11	0.523226	0.772	0.733	1.72947e-06	PDE4D	1.05336e-12	0.632073	0.52	0.485	2.49499e-08
CMTM7	1.13678e-08	-0.842257	0.012	0.037	0.000269258							IFITM1	7.40022e-11	-2.01163	0.009	0.049	1.75282e-06	ANKRD26P1	1.06466e-12	0.942398	0.041	0.014	2.52176e-08
SMAP2	1.16387e-08	0.52217	0.166	0.109	0.000275674							SCNN1D	7.49682e-11	0.79428	0.151	0.072	1.7757e-06	MYOC	1.07405e-12	1.36252	0.036	0.012	2.54399e-08
DTX3	1.25869e-08	0.943527	0.509	0.455	0.000298134							ADIRF	8.43251e-11	-1.44047	0.023	0.076	1.99732e-06	CDKN2A	1.10131e-12	-0.586829	0.032	0.071	2.60856e-08
HIST1H1D	1.31207e-08	-1.02101	0.077	0.125	0.000310776							GSTT2	8.43379e-11	0.953797	0.24	0.146	1.99763e-06	PLCB4	1.19084e-12	0.915264	0.195	0.137	2.82063e-08
SLC44A1	1.33027e-08	0.718536	0.456	0.404	0.000315088							C19orf43	8.8505e-11	0.515514	0.666	0.654	2.09633e-06	ADAMTS7	1.19362e-12	0.579797	0.232	0.17	2.8272e-08
SLC12A8	1.46112e-08	0.535938	0.517	0.471	0.000346082							TMSB4X	9.0109e-11	-0.636601	0.907	0.932	2.13432e-06	PSMB9	1.21279e-12	-0.53374	0.011	0.04	2.87262e-08
UBC	1.49336e-08	-0.551964	0.987	0.993	0.000353716							VSTM2B	9.12902e-11	0.913284	0.196	0.109	2.1623e-06	LEPREL1	1.26267e-12	0.65588	0.073	0.036	2.99076e-08
ATP6V1G2	1.527e-08	0.598214	0.207	0.148	0.000361685							NRXN3	9.82802e-11	0.90487	0.526	0.458	2.32786e-06	CERKL	1.31824e-12	1.19403	0.241	0.185	3.12238e-08
CACNB2	1.53957e-08	0.534512	0.393	0.329	0.000364664							BDH1	1.0114e-10	0.535776	0.514	0.436	2.39561e-06	PRKCZ	1.41017e-12	1.02323	0.085	0.045	3.34013e-08
RCBTB1	1.62023e-08	0.558332	0.425	0.362	0.000383768							PCDH18	1.0299e-10	-0.635888	0.106	0.194	2.43941e-06	MAFF	1.45836e-12	0.675307	0.467	0.411	3.45427e-08
RIC3	1.70535e-08	0.522453	0.535	0.47	0.000403929							PTPRD	1.09248e-10	0.718619	0.496	0.398	2.58766e-06	MYO1B	1.58347e-12	1.02181	0.222	0.165	3.75061e-08
PTPRH	1.76266e-08	-0.591575	0.009	0.031	0.000417503							EBF4	1.09982e-10	0.548105	0.267	0.174	2.60503e-06	FMNL2	1.5934e-12	0.588783	0.494	0.438	3.77413e-08
STK32A	1.78756e-08	0.626795	0.28	0.215	0.000423401							PXK	1.10011e-10	0.859035	0.385	0.286	2.60572e-06	C7orf41	1.70469e-12	0.712636	0.33	0.264	4.03773e-08
CLUHP3	2.0243e-08	0.634408	0.144	0.092	0.000479475							HIST1H2AK	1.10333e-10	0.859481	0.075	0.02	2.61335e-06	DYNC1I1	1.75152e-12	0.81397	0.264	0.204	4.14864e-08
PIK3R3	2.03344e-08	0.518777	0.447	0.393	0.00048164							L3MBTL4	1.1185e-10	0.812436	0.094	0.032	2.64928e-06	GFRA2	1.83236e-12	1.07377	0.046	0.018	4.34012e-08
GFOD1	2.35485e-08	0.879102	0.078	0.039	0.000557769							MAP4K5	1.18582e-10	0.551328	0.592	0.485	2.80872e-06	C11orf87	1.86149e-12	1.21888	0.206	0.15	4.40912e-08
UBQLN2	2.36058e-08	0.500184	0.643	0.615	0.000559127							TGFBI	1.2219e-10	-1.92358	0.028	0.082	2.89419e-06	TMEM169	1.86774e-12	1.15329	0.248	0.191	4.42392e-08
GBP3	2.3684e-08	-0.563412	0.066	0.111	0.000560979							CSRNP1	1.28246e-10	0.520367	0.295	0.195	3.03763e-06	E2F8	2.08194e-12	-0.518487	0.055	0.101	4.93128e-08
ROBO2	2.41111e-08	0.679709	0.528	0.477	0.000571095							PHF21B	1.31358e-10	0.591613	0.193	0.104	3.11134e-06	FAT3	2.11853e-12	0.638043	0.599	0.571	5.01796e-08
MLLT4-AS1	2.47347e-08	0.763328	0.275	0.216	0.000585866							WNT7B	1.33396e-10	0.544551	0.638	0.57	3.15961e-06	DYNC1LI2	2.3445e-12	0.719086	0.629	0.628	5.55319e-08
CLVS2	2.78289e-08	0.751091	0.087	0.046	0.000659156							ZNF783	1.33773e-10	0.678463	0.58	0.516	3.16854e-06	SLC24A6	2.44646e-12	0.748177	0.187	0.131	5.7947e-08
TMEM257	2.93815e-08	0.616446	0.06	0.026	0.00069593							CTSF	1.35743e-10	0.764713	0.304	0.201	3.2152e-06	OPRM1	2.45246e-12	0.985028	0.078	0.041	5.8089e-08
CLDN11	3.10885e-08	0.6134	0.527	0.488	0.000736363							GSTO2	1.43668e-10	0.970905	0.208	0.118	3.40291e-06	MAMDC2	2.52865e-12	0.630914	0.102	0.059	5.98935e-08
USP32P2	3.27847e-08	0.646925	0.341	0.279	0.000776537							GDPD2	1.53014e-10	-0.917838	0.077	0.154	3.62429e-06	NAP1L3	2.53573e-12	0.819917	0.243	0.182	6.00613e-08
KHDRBS3	3.4452e-08	0.512662	0.377	0.312	0.000816031							CLDN10	1.56762e-10	0.790228	0.223	0.134	3.71306e-06	PYGB	2.88755e-12	0.827204	0.414	0.368	6.83946e-08
PLEKHB1	3.71526e-08	0.594143	0.49	0.439	0.000879996							IFITM10	1.62519e-10	0.595306	0.238	0.143	3.84942e-06	HIST1H2BH	2.93962e-12	-0.616161	0.029	0.065	6.96278e-08
NR0B1	4.0767e-08	0.824921	0.034	0.01	0.000965607							SLC17A5	1.62991e-10	-0.572798	0.343	0.443	3.86061e-06	ZNF711	3.14894e-12	0.778209	0.414	0.36	7.45858e-08
RAP1GAP	4.30131e-08	0.568747	0.312	0.249	0.00101881							DUSP26	1.74922e-10	0.645567	0.239	0.143	4.14321e-06	BRD7P3	3.15503e-12	1.06651	0.073	0.037	7.47301e-08
HDAC9	4.40495e-08	0.581366	0.464	0.404	0.00104336							TMEM74	1.76252e-10	-0.820042	0.029	0.085	4.1747e-06	FAM19A1	3.68532e-12	1.609	0.032	0.009	8.72904e-08
NAALAD2	4.42225e-08	0.736911	0.132	0.084	0.00104746							MLH3	1.87927e-10	0.608265	0.256	0.158	4.45124e-06	ATP9A	3.98181e-12	0.532125	0.517	0.477	9.43132e-08
TSHZ1	4.43058e-08	0.502898	0.298	0.239	0.00104943							FBLN1	1.88225e-10	-1.04256	0.395	0.479	4.45829e-06	NIPAL1	4.11946e-12	-0.60032	0.041	0.081	9.75736e-08
LCAT	4.45232e-08	-0.536321	0.19	0.256	0.00105458							DGKG	1.9264e-10	0.981922	0.334	0.238	4.56286e-06	TAC1	4.37411e-12	0.958532	0.075	0.038	1.03605e-07
IL11RA	4.46981e-08	0.623124	0.152	0.1	0.00105872							RBM6	1.93932e-10	0.504068	0.801	0.824	4.59347e-06	MYLK2	4.54114e-12	0.638357	0.05	0.021	1.07561e-07
ACTA2	4.63451e-08	-0.561774	0.059	0.101	0.00109773							PPARGC1A	2.00574e-10	0.739125	0.215	0.125	4.75079e-06	PRMT2	4.66114e-12	0.531885	0.669	0.695	1.10404e-07
CFB	4.75787e-08	-0.94689	0.062	0.105	0.00112695							KIF20A	2.0165e-10	-0.754686	0.058	0.128	4.77628e-06	AP2A2	4.71082e-12	0.512091	0.443	0.392	1.11581e-07
BGN	4.8482e-08	-0.818175	0.146	0.202	0.00114834							ENPP6	2.04109e-10	-0.666558	0.252	0.343	4.83453e-06	FGF9	4.76144e-12	0.544067	0.265	0.205	1.12779e-07
KLHL32	5.88352e-08	0.631896	0.09	0.049	0.00139357							PLEKHS1	2.14468e-10	-1.79195	0.005	0.039	5.07989e-06	RAB36	5.0942e-12	0.591291	0.587	0.569	1.20661e-07
STARD4	6.08408e-08	-0.601877	0.06	0.101	0.00144108							KIAA1107	2.15546e-10	0.708508	0.214	0.124	5.10542e-06	A4GALT	5.86146e-12	0.669902	0.062	0.029	1.38834e-07
KALRN	6.09417e-08	0.530774	0.357	0.294	0.00144347							GTF2IRD2B	2.19753e-10	0.628158	0.324	0.219	5.20506e-06	GLRA2	6.12207e-12	0.58269	0.08	0.042	1.45007e-07
PLCL2	6.16574e-08	0.505274	0.103	0.06	0.00146042							ETV5	2.23864e-10	0.94276	0.529	0.435	5.30243e-06	KIAA2022	6.67866e-12	0.588351	0.153	0.101	1.58191e-07
C1orf158	6.18852e-08	-0.70629	0.003	0.018	0.00146581							ATG2B	2.30832e-10	0.538193	0.452	0.352	5.46748e-06	SPTBN1	7.152e-12	0.529786	0.635	0.616	1.69402e-07
SAA1	6.40714e-08	-2.57328	0.004	0.019	0.00151759							CCDC74B	2.46675e-10	-0.525611	0.076	0.153	5.84275e-06	TPH1	7.60826e-12	1.0282	0.076	0.13	1.80209e-07
CCDC28B	6.95375e-08	0.552406	0.383	0.327	0.00164707							MGAT3	2.53438e-10	0.557242	0.347	0.255	6.00293e-06	SUN1	9.08235e-12	0.64464	0.637	0.656	2.15125e-07
PLBD1	6.95672e-08	-0.599456	0.05	0.088	0.00164777							PHF14	2.5927e-10	0.529469	0.657	0.607	6.14106e-06	C10orf82	9.40504e-12	0.741824	0.02	0.003	2.22768e-07
TNFAIP2	7.56461e-08	-1.64107	0.028	0.059	0.00179175							TMEM178B	2.64225e-10	0.500027	0.467	0.365	6.25842e-06	GLI1	9.9706e-12	0.5393	0.078	0.041	2.36164e-07
AKR1C1	8.05992e-08	0.595664	0.022	0.003	0.00190907							MPPED2	2.73679e-10	0.708109	0.457	0.357	6.48236e-06	NCOA7	1.07684e-11	0.82698	0.384	0.331	2.5506e-07
PTPRG-AS1	8.10241e-08	0.761965	0.755	0.734	0.00191914							BLCAP	2.76355e-10	0.661062	0.571	0.501	6.54574e-06	AMPH	1.088e-11	1.1551	0.19	0.138	2.57705e-07
DBC1	8.15154e-08	0.727359	0.051	0.021	0.00193077							BCL6	2.89665e-10	0.824835	0.589	0.537	6.861e-06	PRSS23	1.14315e-11	0.749638	0.069	0.035	2.70767e-07
SEMA3E	8.35957e-08	0.571327	0.41	0.361	0.00198005							GMPR	3.13186e-10	-0.645362	0.029	0.082	7.41813e-06	HMP19	1.16765e-11	0.757427	0.548	0.507	2.7657e-07
PCDHB8	8.4709e-08	0.627211	0.397	0.339	0.00200642							TMEM144	3.2113e-10	-0.811159	0.042	0.102	7.60628e-06	DKK3	1.21203e-11	0.859891	0.102	0.06	2.87082e-07
CEP97	9.1307e-08	0.555296	0.378	0.313	0.0021627							NT5DC3	3.35175e-10	0.5459	0.874	0.873	7.93895e-06	ARL6IP1	1.21617e-11	-0.6987	0.909	0.956	2.88061e-07
CAMSAP2	9.38509e-08	0.534806	0.496	0.439	0.00222295							TCEAL2	3.36523e-10	0.662603	0.604	0.528	7.97088e-06	ZNF292	1.21855e-11	0.509902	0.756	0.78	2.88627e-07
RIT2	9.39267e-08	0.500019	0.168	0.115	0.00222475							JAG1	3.54314e-10	0.967779	0.507	0.42	8.39227e-06	KCNA1	1.339e-11	0.526573	0.239	0.177	3.17156e-07
PFKFB4	9.86105e-08	-0.585723	0.15	0.206	0.00233569							RNF44	3.59838e-10	0.569749	0.549	0.461	8.52313e-06	DENND6B	1.43322e-11	0.841399	0.254	0.199	3.39472e-07
RGN	9.92647e-08	-1.20584	0.115	0.162	0.00235118							GABRB1	3.77024e-10	0.683518	0.231	0.137	8.93019e-06	TTC9B	1.48637e-11	1.1017	0.06	0.028	3.52061e-07
NAP1L2	1.0543e-07	0.559328	0.066	0.032	0.00249721							DPP10	3.8046e-10	0.682682	0.363	0.258	9.01157e-06	HBA2	1.73386e-11	-0.682556	0.007	0.03	4.10682e-07
HCP5	1.07938e-07	-0.660408	0.056	0.096	0.00255662							TMEM132B	3.97469e-10	0.566283	0.465	0.362	9.41446e-06	CDO1	1.90737e-11	0.815707	0.234	0.18	4.51779e-07
ZNF286A	1.13205e-07	0.579816	0.843	0.843	0.00268136							KCND3	3.98974e-10	0.722695	0.136	0.064	9.4501e-06	ANTXR2	1.97673e-11	0.598411	0.388	0.325	4.68209e-07
DOCK9	1.15818e-07	0.518056	0.142	0.094	0.00274327							APOE	4.11201e-10	-1.60936	0.058	0.126	9.73971e-06	RAB33A	2.07025e-11	0.987326	0.086	0.048	4.90359e-07
KPNA5	1.17348e-07	0.709434	0.292	0.232	0.0027795							KIAA1755	4.1333e-10	0.704318	0.247	0.157	9.79013e-06	COX4I2	2.20338e-11	-0.528622	0.001	0.019	5.21892e-07
C11orf75	1.20959e-07	-0.571212	0.025	0.054	0.00286504							FAM19A1	4.21838e-10	1.31768	0.078	0.023	9.99166e-06	ADPRHL1	2.37195e-11	1.10599	0.128	0.083	5.61821e-07
SUSD4	1.22963e-07	0.556049	0.147	0.097	0.00291249							STK32B	4.26968e-10	1.04869	0.255	0.163	1.01132e-05	THY1	2.43752e-11	0.866412	0.119	0.074	5.77351e-07
LINC00693	1.23881e-07	0.941718	0.064	0.031	0.00293425							ALS2CR11	4.43505e-10	1.02219	0.171	0.092	1.05049e-05	PGAM2	2.49335e-11	0.863242	0.185	0.133	5.90576e-07
MFAP4	1.39012e-07	-0.54536	0.097	0.146	0.00329265							ATP8A1	4.69765e-10	0.864489	0.32	0.232	1.11269e-05	PLK1	2.58058e-11	-0.797844	0.069	0.117	6.11236e-07
CLDN5	1.46989e-07	-0.99823	0.031	0.063	0.00348157							ZNF566	4.76759e-10	0.665464	0.648	0.582	1.12925e-05	PRR5	2.58931e-11	1.00271	0.24	0.187	6.13303e-07
SLC37A1	1.49681e-07	0.568351	0.163	0.111	0.00354535							RGS4	5.30322e-10	-0.817122	0.029	0.082	1.25612e-05	CECR2	2.63531e-11	0.665824	0.311	0.259	6.24199e-07
SH3GL2	1.50132e-07	0.861207	0.065	0.032	0.00355602							FAM168A	5.54283e-10	0.538237	0.542	0.474	1.31287e-05	RIN2	3.11209e-11	0.608004	0.252	0.192	7.37129e-07
RPRM	1.54624e-07	0.566448	0.091	0.051	0.00366243							TBC1D2	5.59429e-10	0.845468	0.256	0.165	1.32506e-05	MYOG	3.15617e-11	-1.57247	0.015	0.043	7.47569e-07
HES6	1.57117e-07	0.581873	0.402	0.349	0.00372147							ST3GAL6	5.78156e-10	0.698832	0.472	0.366	1.36942e-05	ASIC4	3.18909e-11	1.39633	0.068	0.035	7.55369e-07
FGF19	1.58485e-07	-0.655361	0.001	0.013	0.00375388							CSDC2	5.79587e-10	-0.605381	0.036	0.093	1.37281e-05	ZNF608	3.2557e-11	0.532508	0.408	0.354	7.71145e-07
INSIG2	1.60486e-07	-0.648892	0.39	0.458	0.00380128							C4orf19	5.81627e-10	0.566027	0.707	0.641	1.37764e-05	NKAIN3	3.31432e-11	0.678286	0.181	0.127	7.8503e-07
KANK1	1.75256e-07	0.590794	0.511	0.479	0.00415111							LEMD1	5.95152e-10	-1.82142	0.025	0.075	1.40968e-05	SYBU	3.41344e-11	0.975079	0.046	0.019	8.08507e-07
GUCY1B3	1.78505e-07	0.730835	0.132	0.085	0.00422807							HERC2P9	6.23895e-10	0.730455	0.705	0.669	1.47776e-05	PLCH1	3.42328e-11	0.660788	0.275	0.218	8.10838e-07
ARHGEF37	1.79607e-07	-0.56486	0.062	0.102	0.00425417							FCGRT	6.25712e-10	-0.641891	0.352	0.455	1.48206e-05	ZMAT1	3.44254e-11	0.66458	0.381	0.322	8.154e-07
TSPAN15	1.8339e-07	0.54523	0.084	0.046	0.00434377							TNFRSF21	6.2644e-10	0.614277	0.524	0.44	1.48379e-05	FAM171B	3.59019e-11	0.740672	0.191	0.138	8.50372e-07
SOX13	2.01182e-07	0.50856	0.288	0.227	0.00476519							NMB	6.27035e-10	-1.20421	0.142	0.233	1.48519e-05	EFNA5	3.64018e-11	0.515601	0.411	0.351	8.62214e-07
NMT2	2.13023e-07	0.696257	0.903	0.897	0.00504567							IQCD	6.45365e-10	-0.615156	0.039	0.097	1.52861e-05	SP4	4.15053e-11	0.713029	0.529	0.478	9.83094e-07
HOXA7	2.23605e-07	0.533149	0.282	0.225	0.0052963							FOXN2	6.45666e-10	0.822741	0.607	0.525	1.52932e-05	ATP6V0A1	4.25208e-11	0.613193	0.696	0.715	1.00715e-06
DLX2	2.26296e-07	0.820144	0.138	0.092	0.00536005							SLC9A9	6.93631e-10	0.824026	0.23	0.143	1.64293e-05	MYO9A	4.25965e-11	0.645285	0.388	0.334	1.00894e-06
FERMT1	2.30766e-07	0.555864	0.303	0.245	0.00546592							ZKSCAN7	6.97861e-10	0.541802	0.55	0.466	1.65295e-05	CYB5R2	4.33271e-11	-0.570776	0.067	0.112	1.02625e-06
DACH2	2.32126e-07	0.689754	0.034	0.011	0.00549813							GPR173	7.37336e-10	0.554421	0.289	0.195	1.74646e-05	FYN	4.40626e-11	0.510396	0.523	0.48	1.04367e-06
RGR	2.33595e-07	0.78004	0.119	0.074	0.00553294							ABCA8	7.41395e-10	-0.532225	0.018	0.062	1.75607e-05	ARHGEF9	4.57469e-11	0.587673	0.539	0.505	1.08356e-06
RGS16	2.38838e-07	-0.882995	0.32	0.385	0.00565711							RSPO3	7.51133e-10	-1.43608	0.008	0.044	1.77913e-05	NEGR1	5.04951e-11	0.682413	0.132	0.086	1.19603e-06
GLIPR1	2.59001e-07	-0.803562	0.132	0.184	0.00613469							MAN2A2	8.20178e-10	0.693043	0.591	0.524	1.94267e-05	DCT	5.25566e-11	-1.55479	0.089	0.138	1.24486e-06
ZNF74	2.80693e-07	0.587766	0.383	0.321	0.0066485							OSGIN1	8.43346e-10	-0.592006	0.006	0.039	1.99755e-05	IFIT2	5.63447e-11	0.824362	0.055	0.026	1.33458e-06
CP	2.92101e-07	-1.23026	0.036	0.067	0.00691871							SGCD	8.51e-10	-0.739498	0.317	0.409	2.01568e-05	PPAPDC1A	5.93208e-11	0.748892	0.062	0.03	1.40507e-06
LIPG	3.03698e-07	-0.576619	0.03	0.06	0.0071934							NFKBIZ	8.66799e-10	0.523701	0.286	0.189	2.0531e-05	IGSF8	6.50791e-11	0.762376	0.303	0.249	1.54146e-06
OR4N2	3.04676e-07	0.834459	0.057	0.027	0.00721656							GPR45	9.08957e-10	0.562398	0.048	0.008	2.15295e-05	NTN4	6.64491e-11	0.665144	0.046	0.019	1.57391e-06
PI3	3.14608e-07	-3.22829	0.001	0.012	0.0074518							ZNF488	9.12344e-10	1.36142	0.272	0.185	2.16098e-05	VAT1	6.9207e-11	0.551262	0.722	0.76	1.63924e-06
PTX3	3.16869e-07	-1.06715	0.041	0.075	0.00750537							RILPL2	9.16096e-10	-0.561129	0.039	0.097	2.16986e-05	PDE6G	7.78474e-11	-2.91709	0.002	0.02	1.84389e-06
TM7SF2	3.2572e-07	0.524798	0.357	0.304	0.007715							REEP2	9.19693e-10	0.617244	0.494	0.414	2.17838e-05	GNG13	8.47369e-11	-0.608656	0.017	0.046	2.00708e-06
KAT6B	3.29309e-07	0.577947	0.484	0.438	0.00780002							RALGAPA1	1.01762e-09	0.698817	0.353	0.254	2.41035e-05	LEFTY2	9.29024e-11	-0.66218	0.015	0.042	2.20049e-06
WNT5B	3.3243e-07	-0.594194	0.023	0.049	0.00787395							DNAJC18	1.04039e-09	0.678285	0.66	0.607	2.46427e-05	HPCAL4	9.30852e-11	0.559084	0.028	0.009	2.20482e-06
SNCA	3.39156e-07	0.58397	0.038	0.014	0.00803324							LRP3	1.08634e-09	0.703046	0.323	0.231	2.57311e-05	GALNT12	1.05297e-10	0.765931	0.102	0.061	2.49407e-06
CLCN4	3.55189e-07	0.545471	0.201	0.149	0.008413							LRRTM4	1.09982e-09	0.538895	0.357	0.253	2.60504e-05	FUT8	1.12196e-10	0.767379	0.243	0.186	2.65748e-06
2022-03-09	3.68418e-07	0.873663	0.258	0.206	0.00872634							HEPH	1.13539e-09	-0.726225	0.027	0.077	2.68929e-05	IRAK3	1.17387e-10	0.742719	0.286	0.242	2.78042e-06
CACNA2D3	3.84904e-07	0.945153	0.038	0.014	0.00911683							C9orf116	1.1653e-09	-0.825162	0.025	0.076	2.76013e-05	APLP1	1.177e-10	0.691903	0.32	0.273	2.78785e-06
MAOB	4.00087e-07	-1.0743	0.208	0.265	0.00947646							CAND2	1.26776e-09	0.520646	0.276	0.182	3.00283e-05	RASSF9	1.18243e-10	0.968176	0.049	0.022	2.80071e-06
NR4A2	4.06289e-07	0.613019	0.118	0.075	0.00962335							RCN2	1.28009e-09	0.506709	0.824	0.832	3.03203e-05	SUN2	1.23224e-10	0.65506	0.367	0.318	2.91869e-06
LUST	4.12842e-07	0.54557	0.565	0.53	0.00977857							SH3D19	1.30868e-09	0.546068	0.543	0.425	3.09973e-05	NR4A2	1.30754e-10	0.999714	0.26	0.207	3.09704e-06
LOC283174	1.37089e-20	0.762759	0.247	0.143	3.24709e-16							DNAJC6	1.34198e-09	0.773768	0.327	0.234	3.17862e-05	C4orf48	1.30961e-10	0.553165	0.412	0.372	3.10195e-06
LOC254559	2.66114e-12	0.617542	0.281	0.197	6.30318e-08							ASGR1	1.41588e-09	0.79831	0.156	0.081	3.35364e-05	SMARCA5	1.31207e-10	0.627201	0.689	0.679	3.10778e-06
LOC100505687	8.33715e-09	0.650813	0.301	0.238	0.000197474							KIF3C	1.49091e-09	0.693139	0.453	0.375	3.53137e-05	IRF2BP2	1.36537e-10	0.523496	0.722	0.754	3.23401e-06
LOC100288122	6.51803e-08	0.720963	0.095	0.054	0.00154386							LOC643669	1.60193e-09	0.872421	0.206	0.126	3.79433e-05	APAF1	1.36935e-10	0.533017	0.611	0.579	3.24344e-06
												PGRMC1	1.64603e-09	0.519673	0.794	0.766	3.89878e-05	PRKAG2-AS1	1.48835e-10	0.966235	0.101	0.062	3.5253e-06
												PTBP2	1.70343e-09	0.621848	0.652	0.603	4.03475e-05	ABCB4	1.51411e-10	0.579276	0.051	0.023	3.58632e-06
												LIPG	1.73987e-09	-0.657365	0.067	0.136	4.12106e-05	TMEM184B	1.61647e-10	0.671024	0.425	0.376	3.82877e-06
												THBS1	1.81171e-09	-0.624497	0.164	0.253	4.29123e-05	DZIP1	1.66941e-10	0.574302	0.421	0.374	3.95416e-06
												LPAR1	1.81492e-09	-0.853428	0.042	0.1	4.29881e-05	ADARB2-AS1	1.726e-10	0.686706	0.043	0.018	4.0882e-06
												DAPK1	1.85964e-09	-0.522075	0.194	0.287	4.40474e-05	MT1G	1.78697e-10	-1.96183	0.007	0.027	4.23262e-06
												BCHE	1.86397e-09	0.675609	0.746	0.698	4.41501e-05	AKR1C1	1.83102e-10	0.717961	0.114	0.071	4.33695e-06
												ARL17A	1.93956e-09	0.651532	0.731	0.712	4.59404e-05	C20orf112	1.85315e-10	0.570128	0.664	0.674	4.38936e-06
												AKT2	1.96027e-09	0.609745	0.69	0.636	4.64309e-05	SYNPR	1.87679e-10	1.16649	0.075	0.041	4.44536e-06
												OGT	2.06447e-09	0.561647	0.752	0.701	4.8899e-05	ZNF548	2.01916e-10	0.552493	0.76	0.731	4.78257e-06
												SCAND2P	2.06633e-09	0.597007	0.563	0.501	4.89431e-05	PTPRR	2.26708e-10	0.895354	0.23	0.178	5.3698e-06
												PPARG	2.08667e-09	-0.653987	0.016	0.057	4.94248e-05	DSCAML1	2.38973e-10	0.537121	0.53	0.5	5.66032e-06
												PLAT	2.15018e-09	1.50287	0.267	0.182	5.09291e-05	CADM2	2.4903e-10	0.803733	0.328	0.28	5.89854e-06
												GRIPAP1	2.28451e-09	0.705967	0.787	0.76	5.4111e-05	ZNF37BP	2.59927e-10	0.617553	0.697	0.673	6.15662e-06
												PCDHA2	2.32839e-09	0.739127	0.119	0.054	5.51503e-05	WDR47	2.65454e-10	0.749472	0.378	0.332	6.28754e-06
												XKR6	2.4263e-09	0.520269	0.134	0.065	5.74695e-05	ACTL6B	2.72841e-10	0.578381	0.475	0.432	6.4625e-06
												PRNP	2.44451e-09	0.66147	0.713	0.706	5.79006e-05	L1TD1	2.87115e-10	-1.62848	0.807	0.798	6.80061e-06
												ASPRV1	2.47249e-09	0.553579	0.151	0.077	5.85634e-05	ABAT	2.98898e-10	0.638009	0.115	0.074	7.07971e-06
												OR2A20P	2.50112e-09	0.774859	0.09	0.034	5.92415e-05	PLBD2	3.02169e-10	0.639108	0.303	0.252	7.15717e-06
												PLK1	2.52193e-09	-0.7636	0.09	0.164	5.97345e-05	PTPRN2	3.0696e-10	0.676381	0.235	0.182	7.27066e-06
												SNHG10	2.57487e-09	0.754946	0.335	0.242	6.09883e-05	DCLK2	3.14631e-10	0.545317	0.355	0.307	7.45234e-06
												CA14	2.69492e-09	-0.55585	0.225	0.328	6.38319e-05	PPP2R5B	3.49851e-10	0.539818	0.141	0.095	8.28656e-06
												FAM107A	2.72899e-09	-0.949509	0.118	0.198	6.46388e-05	SLC41A2	3.63849e-10	0.86892	0.271	0.222	8.61814e-06
												SPIN3	2.74672e-09	0.758863	0.362	0.275	6.50589e-05	SCN1B	3.77383e-10	0.709575	0.051	0.024	8.9387e-06
												ZNF577	2.88274e-09	0.562166	0.38	0.278	6.82806e-05	TENM3	3.92945e-10	0.644175	0.396	0.349	9.30729e-06
												PCP4	2.93214e-09	0.584412	0.395	0.291	6.94507e-05	FOXN3	3.93181e-10	0.60783	0.428	0.378	9.31288e-06
												ZNF780B	2.93595e-09	0.523087	0.74	0.706	6.95409e-05	GPRASP2	3.97864e-10	0.723086	0.237	0.184	9.42381e-06
												ARHGAP31	2.96106e-09	0.544462	0.583	0.504	7.01357e-05	DNAJC12	4.80949e-10	1.04237	0.212	0.163	1.13918e-05
												SEPP1	3.14515e-09	-0.762877	0.142	0.224	7.44959e-05	RP1-177G6.2	5.1867e-10	1.24754	0.305	0.257	1.22852e-05
												PTPN5	3.26225e-09	0.842093	0.189	0.11	7.72697e-05	CRTC1	5.51461e-10	0.590593	0.427	0.39	1.30619e-05
												FAM215A	3.26923e-09	0.640745	0.308	0.229	7.74349e-05	SCNN1G	5.53238e-10	0.671286	0.037	0.014	1.3104e-05
												TIMP3	3.3181e-09	-0.606745	0.325	0.208	7.85925e-05	DNAJB5	5.57717e-10	0.664683	0.265	0.214	1.32101e-05
												DUSP16	3.65232e-09	0.643464	0.431	0.336	8.65088e-05	CLCN4	5.82028e-10	0.657092	0.317	0.265	1.37859e-05
												PALMD	3.85867e-09	-1.07197	0.006	0.039	9.13965e-05	DNTT	5.96897e-10	0.857103	0.017	0.003	1.41381e-05
												AGAP2	3.94938e-09	0.563411	0.299	0.209	9.35449e-05	SULT1C4	5.99811e-10	0.628519	0.171	0.123	1.42071e-05
												ZNF876P	4.03284e-09	0.728554	0.59	0.522	9.55219e-05	GOLGA8S	6.05156e-10	0.853445	0.159	0.114	1.43337e-05
												C7orf50	4.19983e-09	0.512826	0.666	0.655	9.94772e-05	TMEM63C	6.06935e-10	0.574244	0.205	0.154	1.43759e-05
												CMTM7	4.29301e-09	-0.903593	0.017	0.059	0.000101684	QPCT	6.16576e-10	0.902335	0.087	0.051	1.46042e-05
												ADRB1	4.44365e-09	0.891436	0.146	0.076	0.000105252	TM4SF1	6.3426e-10	1.00412	0.13	0.087	1.50231e-05
												ZNF117	4.48144e-09	0.677202	0.707	0.656	0.000106147	PREX1	6.35026e-10	0.6157	0.295	0.242	1.50412e-05
												ING5	4.58792e-09	0.663266	0.676	0.642	0.00010867	ATL1	6.67221e-10	0.828355	0.331	0.285	1.58038e-05
												FZD7	4.61677e-09	-0.849063	0.009	0.044	0.000109353	PDE4B	6.99732e-10	0.532577	0.262	0.205	1.65739e-05
												CRELD1	4.63539e-09	0.691783	0.368	0.274	0.000109794	NPY1R	7.14393e-10	1.3957	0.071	0.039	1.69211e-05
												PDE1C	4.7583e-09	0.802079	0.136	0.068	0.000112705	RMST	7.43022e-10	0.535302	0.335	0.275	1.75992e-05
												DHRS7	4.88129e-09	0.899354	0.515	0.457	0.000115618	TMEM14A	7.77269e-10	0.816783	0.313	0.271	1.84104e-05
												ZMAT4	4.88278e-09	-0.578995	0.019	0.063	0.000115654	CNTN1	8.05935e-10	0.920631	0.262	0.214	1.90894e-05
												PRR16	4.92707e-09	-0.574357	0.026	0.073	0.000116703	CNRIP1	8.56555e-10	0.60729	0.486	0.45	2.02884e-05
												PLCXD2	4.93383e-09	0.819365	0.162	0.09	0.000116863	FAM217B	8.99423e-10	0.546729	0.673	0.652	2.13037e-05
												RASA4	4.95815e-09	-0.511107	0.535	0.627	0.000117439	GJA1	9.12162e-10	-0.80679	0.063	0.104	2.16055e-05
												TMOD1	5.0096e-09	0.681499	0.493	0.393	0.000118657	LBH	1.01821e-09	0.619021	0.33	0.279	2.41173e-05
												RNF112	5.14557e-09	0.609446	0.118	0.055	0.000121878	NKAIN4	1.03441e-09	1.043	0.082	0.048	2.45009e-05
												SYP	5.17499e-09	0.722062	0.336	0.249	0.000122575	TBC1D30	1.1509e-09	0.580813	0.301	0.247	2.72603e-05
												PRRT3-AS1	5.4158e-09	0.976701	0.12	0.056	0.000128279	CBFA2T3	1.16385e-09	0.646852	0.3	0.257	2.7567e-05
												ELN	5.49084e-09	-1.14061	0.236	0.332	0.000130056	TRAK1	1.17185e-09	0.700495	0.391	0.351	2.77565e-05
												EXTL1	5.71504e-09	0.924261	0.395	0.322	0.000135366	DGKA	1.29141e-09	0.700105	0.079	0.046	3.05883e-05
												ZNF614	5.72138e-09	0.837989	0.369	0.273	0.000135517	RGS8	1.44051e-09	1.20214	0.039	0.017	3.412e-05
												SLC30A2	6.03688e-09	0.568816	0.069	0.021	0.000142989	GALNT9	1.44533e-09	0.773773	0.071	0.039	3.42341e-05
												LMCD1	6.04609e-09	0.940196	0.178	0.102	0.000143208	MAPK8IP3	1.45039e-09	0.516491	0.459	0.426	3.43539e-05
												ATP6V0C	6.1277e-09	0.559545	0.714	0.732	0.000145141	SNAP25	1.45133e-09	0.720537	0.587	0.595	3.43762e-05
												KIAA1239	6.3398e-09	0.580766	0.045	0.008	0.000150165	GALNT16	1.66308e-09	0.554937	0.104	0.065	3.93918e-05
												ZXDC	6.36983e-09	0.551164	0.882	0.846	0.000150876	ZNF532	1.83642e-09	0.5714	0.724	0.738	4.34974e-05
												TGDS	6.62062e-09	-0.501701	0.132	0.214	0.000156816	SCNN1B	1.83873e-09	0.571744	0.025	0.008	4.35521e-05
												SEMA4D	6.70417e-09	-1.49168	0.225	0.308	0.000158795	CXCL3	1.89267e-09	-0.544123	0.001	0.014	4.48299e-05
												LMCD1-AS1	6.70933e-09	0.535405	0.147	0.077	0.000158917	PDE1A	1.89589e-09	0.676869	0.032	0.012	4.4906e-05
												KLHL32	6.94606e-09	1.11305	0.175	0.1	0.000164524	DZIP3	2.03507e-09	0.689875	0.569	0.536	4.82027e-05
												IL1RAP	6.95284e-09	1.21321	0.318	0.232	0.000164685	SFRP4	2.03819e-09	1.09076	0.068	0.037	4.82765e-05
												HMMR	7.38952e-09	-0.678694	0.036	0.089	0.000175028	BHLHE22	2.0453e-09	0.59651	0.111	0.072	4.8445e-05
												PRKCA	7.3914e-09	0.757991	0.828	0.806	0.000175073	ADD2	2.06487e-09	0.801156	0.329	0.278	4.89084e-05
												ZNF135	7.4264e-09	0.739189	0.337	0.248	0.000175902	MPO	2.08368e-09	0.548776	0.028	0.01	4.9354e-05
												DNM1P41	7.46e-09	0.512439	0.624	0.606	0.000176698	ZFP37	2.19918e-09	0.772197	0.193	0.144	5.20897e-05
												TUBB2A	7.59584e-09	0.571736	0.774	0.726	0.000179915	DBI	2.32082e-09	0.878392	0.537	0.558	5.49709e-05
												MYH7	7.71856e-09	0.53158	0.094	0.038	0.000182822	HRK	2.35564e-09	0.948088	0.054	0.027	5.57957e-05
												TMEM130	7.83529e-09	0.978842	0.548	0.487	0.000185587	CCDC28B	2.43082e-09	0.73713	0.226	0.177	5.75765e-05
												SNX33	7.96181e-09	0.677098	0.231	0.146	0.000188583	TBCB	2.45358e-09	0.518273	0.662	0.71	5.81155e-05
												NETO1	8.3853e-09	0.546855	0.331	0.237	0.000198614	PCDHGB7	2.55917e-09	0.985091	0.256	0.207	6.06166e-05
												TMEM2	8.91672e-09	-0.585832	0.114	0.188	0.000211201	KCNIP3	2.67474e-09	0.68868	0.037	0.015	6.33538e-05
												HDGFRP3	8.98128e-09	0.675397	0.551	0.47	0.00021273	TCEAL6	2.97689e-09	0.55011	0.038	0.016	7.05106e-05
												DKK1	9.02543e-09	-1.72357	0.012	0.048	0.000213776	FAM117B	3.03879e-09	0.678717	0.7	0.681	7.19767e-05
												ME3	9.04929e-09	0.581118	0.307	0.213	0.000214342	CRIPT	3.13298e-09	0.514815	0.656	0.675	7.42077e-05
												FGFBP3	9.14669e-09	-0.795408	0.335	0.41	0.000216649	SERP2	3.13776e-09	1.04487	0.067	0.037	7.43211e-05
												SLC9A7	9.70243e-09	0.55886	0.74	0.715	0.000229812	CPB2-AS1	3.29031e-09	0.586813	0.409	0.369	7.79343e-05
												PCDHA3	1.00861e-08	0.744372	0.215	0.136	0.000238898	PEG10	3.54485e-09	0.707227	0.462	0.421	8.39633e-05
												GUSBP1	1.05791e-08	0.778311	0.568	0.518	0.000250576	SH3BP5	3.63374e-09	0.59901	0.451	0.413	8.60688e-05
												AMER3	1.06007e-08	0.590787	0.184	0.112	0.000251088	PTEN	3.8609e-09	0.52128	0.613	0.621	9.14492e-05
												LINC00476	1.07512e-08	0.529662	0.652	0.593	0.000254653	SENP7	4.23734e-09	0.603945	0.501	0.469	0.000100366
												RHPN1	1.08493e-08	0.759974	0.263	0.18	0.000256977	RALGAPA2	4.26786e-09	0.9475	0.459	0.435	0.000101088
												EYA1	1.0961e-08	0.504917	0.286	0.192	0.000259623	TRPC1	4.30524e-09	0.602064	0.146	0.103	0.000101974
												FAM46C	1.18567e-08	-0.527231	0.073	0.14	0.000280839	AKAP2	4.4329e-09	0.817689	0.129	0.089	0.000104998
												HERC1	1.2105e-08	0.511681	0.651	0.598	0.000286719	DNAJC18	4.59647e-09	0.642281	0.587	0.563	0.000108872
												RAD52	1.26922e-08	0.618705	0.403	0.325	0.000300627	LOC643669	4.73521e-09	1.18759	0.118	0.08	0.000112158
												ZNF727	1.33352e-08	0.658411	0.208	0.128	0.000315858	MSANTD3-TMEFF1	4.74976e-09	0.852762	0.216	0.168	0.000112503
												SGK1	1.34412e-08	0.968222	0.435	0.342	0.000318367	BCAT1	5.4721e-09	0.810902	0.222	0.174	0.000129612
												CLSTN1	1.34427e-08	0.561259	0.558	0.508	0.000318404	SSX4B	5.48026e-09	-0.578073	0.001	0.013	0.000129805
												ATRNL1	1.36813e-08	0.602112	0.245	0.16	0.000324056	GPR137C	5.54985e-09	0.765394	0.148	0.105	0.000131454
												EHD3	1.37891e-08	0.853758	0.541	0.485	0.000326609	GAS6	5.87677e-09	0.739064	0.115	0.076	0.000139197
												GSTT2B	1.44992e-08	0.627077	0.232	0.148	0.000343428	RIMS3	6.17624e-09	1.01929	0.13	0.092	0.000146291
												RPS16P5	1.47595e-08	0.636921	0.125	0.061	0.000349594	ESM1	6.22181e-09	1.3739	0.104	0.068	0.00014737
												CD38	1.79305e-08	-0.587742	0.038	0.091	0.000424702	PIK3R1	6.2898e-09	1.1289	0.338	0.294	0.00014898
												NPPA	1.82502e-08	0.649157	0.115	0.054	0.000432273	FAM5B	6.5278e-09	0.899528	0.06	0.032	0.000154618
												SLCO1C1	1.91504e-08	-0.5028	0.023	0.067	0.000453597	DCTN2	6.88285e-09	0.500731	0.772	0.821	0.000163027
												GPR156	2.01538e-08	0.567818	0.115	0.054	0.000477364	NAP1L2	7.04617e-09	0.705424	0.035	0.015	0.000166896
												KANK2	2.02891e-08	-0.564233	0.154	0.23	0.000480568	AK5	7.27731e-09	0.813983	0.056	0.03	0.00017237
												HOXA2	2.03655e-08	0.608438	0.096	0.04	0.000482378	RGPD5	7.5305e-09	0.554911	0.577	0.559	0.000178367
												CDH13	2.04914e-08	0.609476	0.323	0.233	0.000485359	ZNF528	7.91698e-09	0.555401	0.641	0.613	0.000187522
												AURKC	2.06047e-08	0.816249	0.052	0.013	0.000488042	UBE2L6	7.99639e-09	0.63987	0.377	0.336	0.000189402
												AQP4	2.13867e-08	-0.650872	0.115	0.189	0.000506566	RNF144A	8.06864e-09	0.606631	0.405	0.358	0.000191114
												LAMB3	2.15631e-08	-0.744486	0.023	0.065	0.000510743	ALDOC	8.44658e-09	1.72637	0.073	0.043	0.000200066
												SNAI2	2.25705e-08	-0.537013	0.03	0.077	0.000534605	SHC4	8.49104e-09	0.759572	0.072	0.041	0.000201119
												TRIM34	2.27552e-08	-1.05886	0.014	0.051	0.000538979	SRGAP2B	8.56472e-09	0.806751	0.133	0.093	0.000202864
												HIST3H2A	2.28746e-08	0.525426	0.609	0.568	0.000541808	PI15	8.71787e-09	-1.15859	0.04	0.073	0.000206491
												DLG2	2.28773e-08	0.610539	0.225	0.145	0.000541872	TGOLN2	9.85206e-09	0.623571	0.697	0.709	0.000233356
												ELOVL2	2.44046e-08	0.720594	0.041	0.007	0.000578048	CCDC144C	9.87274e-09	0.763224	0.284	0.239	0.000233846
												PTPRU	2.44369e-08	0.803946	0.169	0.097	0.000578813	ETV3L	9.96996e-09	-0.99144	0.004	0.021	0.000236148
												ZNF844	2.49604e-08	0.937595	0.171	0.098	0.000591212	MYH10	1.04099e-08	0.657153	0.512	0.486	0.000246568
												CNTD2	2.49886e-08	0.553397	0.07	0.023	0.00059188	GPRIN2	1.04216e-08	0.546657	0.051	0.025	0.000246845
												C12orf56	2.51759e-08	0.69012	0.112	0.052	0.000596316	KIRREL3	1.04603e-08	0.52299	0.086	0.052	0.000247762
												WFDC1	2.54594e-08	0.877954	0.058	0.016	0.000603032	PIAS3	1.07974e-08	0.899461	0.284	0.241	0.000255746
												GABRA1	2.57971e-08	1.49652	0.049	0.011	0.000611031	ROR1	1.0998e-08	0.75526	0.239	0.192	0.000260499
												GLDN	2.67316e-08	-0.907566	0.023	0.065	0.000633165	SEC31B	1.13144e-08	0.639647	0.17	0.125	0.000267993
												PHF12	2.78816e-08	1.00539	0.358	0.285	0.000660405	AMER3	1.29607e-08	0.650902	0.288	0.239	0.000306988
												INHBA	2.83317e-08	-0.590886	0.01	0.044	0.000671064	FAM13C	1.29612e-08	0.839681	0.159	0.116	0.000307
												PINLYP	2.90038e-08	0.68978	0.134	0.069	0.000686984	FAM212B	1.42146e-08	0.697667	0.305	0.261	0.000336688
												CLDN1	2.90716e-08	0.908876	0.042	0.008	0.000688591	PREPL	1.46793e-08	0.605766	0.687	0.707	0.000347694
												ARHGAP20	3.03602e-08	0.673946	0.201	0.125	0.000719112	GOLM1	1.50165e-08	0.74583	0.515	0.5	0.000355682
												ZNF649	3.0498e-08	0.585747	0.518	0.424	0.000722375	F2R	1.50842e-08	0.921437	0.64	0.628	0.000357285
												CENPV	3.13676e-08	0.530008	0.445	0.366	0.000742974	SAMD12	1.53198e-08	0.590394	0.146	0.106	0.000362865
												BASP1	3.16141e-08	0.544718	0.518	0.436	0.000748811	CADPS	1.61277e-08	0.561216	0.631	0.631	0.000382
												CEP68	3.26098e-08	0.544183	0.862	0.839	0.000772395	ATP6V0D1	1.64614e-08	0.552491	0.541	0.554	0.000389904
												MT1E	3.30677e-08	0.907429	0.179	0.107	0.000783241	CBLN2	1.73521e-08	0.635801	0.042	0.019	0.000411002
												DPYSL4	3.43888e-08	0.724832	0.507	0.454	0.000814534	CPA4	1.8098e-08	0.801973	0.367	0.328	0.000428669
												PPP1R10	3.44436e-08	0.598495	0.672	0.641	0.000815832	IFIH1	1.84612e-08	0.592882	0.073	0.043	0.000437272
												RBP4	3.7034e-08	0.722729	0.206	0.129	0.000877187	PABPC5	1.91522e-08	0.983928	0.06	0.033	0.000453639
												AGAP4	3.70564e-08	0.984899	0.241	0.162	0.000877717	ZNF280D	2.04445e-08	0.641299	0.489	0.471	0.000484248
												CPSF1	3.91751e-08	0.540314	0.512	0.424	0.000927902	IFI27	2.17085e-08	-0.792028	0.066	0.103	0.000514187
												GPRASP1	3.96531e-08	0.890613	0.208	0.133	0.000939224	DCDC5	2.21388e-08	1.15651	0.282	0.24	0.00052438
												TPST2	4.04591e-08	-0.519358	0.088	0.157	0.000958314	NINL	2.36034e-08	0.617285	0.49	0.481	0.000559071
												MRAS	4.16334e-08	0.719932	0.317	0.232	0.000986128	NDUFA4L2	2.40818e-08	-0.772403	0.069	0.108	0.000570402
												SNORD10	4.18274e-08	0.849982	0.174	0.104	0.000990724	PBX3	2.61144e-08	1.58782	0.137	0.099	0.000618545
												CDH19	4.23027e-08	-0.549887	0.097	0.165	0.00100198	SNN	2.79737e-08	0.604466	0.422	0.382	0.000662586
												MELK	4.24648e-08	-0.510205	0.189	0.268	0.00100582	SOGA3	2.86248e-08	0.605521	0.328	0.293	0.000678008
												TAPT1-AS1	4.44517e-08	0.747668	0.313	0.234	0.00105288	KCNA2	2.91761e-08	0.878027	0.095	0.061	0.000691065
												PCDHB18	4.52929e-08	0.86337	0.159	0.091	0.00107281	SLC25A36	3.1744e-08	0.683266	0.673	0.707	0.000751888
												NNMT	4.58282e-08	-1.91517	0.01	0.043	0.00108549	SCN3B	3.18997e-08	0.694798	0.501	0.474	0.000755576
												COL1A1	4.80795e-08	-0.84459	0.018	0.055	0.00113881	PKIB	3.22284e-08	1.5616	0.122	0.085	0.000763361
												PODNL1	4.93799e-08	-1.00396	0.071	0.129	0.00116961	RGS12	3.24211e-08	0.526413	0.567	0.548	0.000767925
												CCDC144A	5.01471e-08	0.649632	0.376	0.285	0.00118778	EFNB3	3.33092e-08	0.567479	0.183	0.139	0.000788962
												SPRED2	5.06124e-08	0.744567	0.471	0.398	0.00119881	HSF4	3.34568e-08	0.668094	0.204	0.16	0.000792458
												CPNE6	5.3812e-08	-1.20909	0.016	0.052	0.00127459	HSPH1	3.42822e-08	0.517134	0.312	0.393	0.000812008
												OR2A7	5.49649e-08	1.02663	0.052	0.013	0.0013019	RALGDS	3.49737e-08	0.624546	0.33	0.286	0.000828387
												CST3	5.78383e-08	0.803527	0.852	0.896	0.00136996	RRM2	3.57744e-08	-0.883655	0.518	0.568	0.000847352
												SLC12A9	5.82629e-08	0.601896	0.19	0.12	0.00138001	PCDHGA1	3.8514e-08	0.636176	0.213	0.169	0.000912242
												KAL1	5.88422e-08	-0.523518	0.139	0.216	0.00139374	SLC6A5	3.95635e-08	0.719702	0.072	0.043	0.0009371
												NKAIN1	6.38493e-08	0.689852	0.238	0.16	0.00151234	ZCCHC18	3.96703e-08	0.757772	0.143	0.103	0.000939631
												NISCH	6.97508e-08	0.636879	0.657	0.648	0.00165212	MOBP	4.00153e-08	0.740242	0.086	0.054	0.000947803
												PKDCC	7.26485e-08	1.23244	0.169	0.102	0.00172075	ING4	4.16484e-08	0.528175	0.605	0.632	0.000986483
												ABCA3	7.54685e-08	0.629081	0.474	0.397	0.00178755	ICA1	4.33699e-08	0.803226	0.042	0.02	0.00102726
												SNAP91	7.94528e-08	0.635713	0.313	0.223	0.00188192	FAM19A5	4.38322e-08	0.699498	0.255	0.211	0.00103821
												PDE6D	8.20547e-08	0.79649	0.559	0.521	0.00194355	EHD1	4.41921e-08	0.781095	0.274	0.232	0.00104673
												ZNF362	8.3187e-08	0.512519	0.378	0.302	0.00197037	FRMD3	4.48938e-08	0.940508	0.053	0.028	0.00106335
												DUSP5P1	8.58795e-08	0.685971	0.093	0.04	0.00203414	TNFRSF11B	5.41259e-08	-0.574797	0.054	0.088	0.00128203
												CASP1	8.97534e-08	-0.952627	0.008	0.037	0.0021259	STAMBPL1	6.05963e-08	0.711382	0.1	0.066	0.00143529
												KIF13A	9.0897e-08	0.934986	0.369	0.286	0.00215299	CLSTN1	6.06923e-08	0.538354	0.412	0.38	0.00143756
												KCTD16	9.18382e-08	0.761711	0.125	0.065	0.00217528	BAALC	6.09788e-08	0.96308	0.072	0.043	0.00144434
												PKD2	9.3951e-08	0.590432	0.422	0.348	0.00222532	GLS	6.21856e-08	0.765261	0.209	0.165	0.00147293
												PCDHA1	9.70221e-08	1.07549	0.04	0.008	0.00229806	TMEFF1	6.2753e-08	1.07845	0.073	0.044	0.00148637
												PID1	1.00673e-07	0.628148	0.501	0.424	0.00238453	ZNF254	6.27567e-08	0.692411	0.488	0.451	0.00148646
												FLG2	1.01299e-07	0.547561	0.476	0.419	0.00239937	RNF130	6.61139e-08	0.566778	0.555	0.539	0.00156597
												KLRC4-KLRK1	1.01851e-07	1.0964	0.079	0.031	0.00241245	RNF112	6.82086e-08	0.575873	0.089	0.058	0.00161559
												CLCC1	1.0504e-07	0.573093	0.906	0.896	0.00248798	GCK	7.24136e-08	1.06596	0.107	0.074	0.00171519
												MCF2	1.05189e-07	0.626207	0.13	0.069	0.0024915	HECW1	7.27196e-08	0.528346	0.18	0.136	0.00172244
												ZNF529	1.07739e-07	0.575296	0.722	0.671	0.0025519	CLVS1	7.97047e-08	0.910574	0.258	0.215	0.00188789
												CALHM2	1.11608e-07	-0.625034	0.051	0.104	0.00264354	AFMID	8.03375e-08	0.503961	0.778	0.764	0.00190287
												SARDH	1.12646e-07	0.539409	0.071	0.026	0.00266814	RASSF2	8.19134e-08	0.693176	0.292	0.253	0.0019402
												MSANTD4	1.15089e-07	0.575367	0.616	0.568	0.00272599	CHDH	8.52175e-08	0.566288	0.305	0.266	0.00201846
												RTKN	1.18084e-07	0.582252	0.635	0.606	0.00279693	NEDD4L	8.75721e-08	0.799187	0.455	0.433	0.00207423
												ACVR2B	1.18869e-07	0.590561	0.389	0.31	0.00281554	CXCL11	9.01197e-08	-0.569995	0.004	0.019	0.00213457
												STX3	1.19962e-07	-0.591961	0.197	0.273	0.00284141	TPPP3	9.05898e-08	0.599022	0.293	0.253	0.00214571
												MGAT4C	1.20266e-07	-0.778941	0.029	0.071	0.00284861	FST	9.17272e-08	-0.794289	0.006	0.021	0.00217265
												C10orf10	1.26106e-07	-0.70159	0.034	0.08	0.00298694	ACPL2	9.17951e-08	0.599633	0.296	0.253	0.00217426
												NCOA6	1.27218e-07	0.562817	0.581	0.524	0.00301329	SLC24A3	9.3976e-08	0.607083	0.028	0.011	0.00222591
												ZHX3	1.36472e-07	0.507129	0.748	0.702	0.00323247	GNAZ	9.45157e-08	0.790192	0.242	0.2	0.0022387
												PCDHA11	1.37362e-07	0.582945	0.098	0.045	0.00325355	NBEAP1	1.09677e-07	1.06817	0.087	0.056	0.00259781
												CGREF1	1.39341e-07	0.792305	0.371	0.3	0.00330043	POU3F2	1.11434e-07	0.910893	0.1	0.067	0.00263943
												FAM84A	1.44201e-07	0.701021	0.348	0.261	0.00341556	ZFP90	1.16923e-07	0.543549	0.493	0.456	0.00276943
												DNM1P46	1.4443e-07	0.572224	0.408	0.335	0.00342097	MAB21L2	1.20757e-07	0.568225	0.23	0.302	0.00286024
												PCBP1-AS1	1.45547e-07	0.599378	0.442	0.378	0.00344743	EHD3	1.2358e-07	0.739546	0.094	0.062	0.00292712
												GALR1	1.4741e-07	0.567621	0.114	0.056	0.00349156	SEC24D	1.23886e-07	0.957785	0.115	0.079	0.00293438
												ANKRD20A2	1.48465e-07	0.566842	0.38	0.298	0.00351653	RBMS1	1.28003e-07	0.52163	0.24	0.194	0.00303187
												CDKL1	1.49941e-07	0.986922	0.113	0.056	0.0035515	ITGB8	1.34632e-07	0.528146	0.479	0.44	0.0031889
												SERP2	1.55893e-07	0.989894	0.172	0.105	0.00369247	ZDHHC15	1.37391e-07	0.615916	0.448	0.419	0.00325424
												CTSD	1.57776e-07	-0.738137	0.711	0.812	0.00373707	MAGEH1	1.39905e-07	0.766163	0.32	0.286	0.00331379
												BOK	1.6135e-07	1.06963	0.142	0.079	0.00382173	PDGFA	1.40332e-07	0.67817	0.184	0.143	0.0033239
												PCDHB19P	1.62418e-07	0.692906	0.235	0.16	0.00384703	TMCO3	1.47642e-07	0.782111	0.284	0.243	0.00349704
												IRS2	1.71215e-07	0.652711	0.378	0.297	0.00405541	VAV2	1.50803e-07	0.704931	0.221	0.18	0.00357192
												CHRNB2	1.71338e-07	0.61522	0.274	0.193	0.00405832	DPY19L2	1.55617e-07	0.758199	0.186	0.144	0.00368593
												YPEL1	1.7352e-07	0.527432	0.618	0.541	0.00411	FGF19	1.57336e-07	0.62653	0.014	0.003	0.00372666
												TMCC3	1.77477e-07	-0.563854	0.134	0.204	0.00420372	FITM1	1.59931e-07	-0.537307	0.011	0.029	0.00378812
												ZNF493	1.78057e-07	0.868695	0.643	0.57	0.00421747	TMEM25	1.66767e-07	0.688779	0.26	0.216	0.00395005
												DNAJB1	1.81601e-07	1.32719	0.712	0.705	0.00430141	MYL4	1.68106e-07	-0.802269	0.003	0.015	0.00398175
												ITPK1-AS1	1.81759e-07	0.956862	0.088	0.039	0.00430515	UPF3B	1.68982e-07	0.501743	0.428	0.529	0.00400252
												KCNJ3	1.84306e-07	0.588693	0.324	0.245	0.00436547	DCP1A	1.69519e-07	0.513753	0.836	0.828	0.00401523
												GGT8P	1.8933e-07	0.50777	0.516	0.464	0.00448446	CPNE4	1.77924e-07	0.773263	0.258	0.212	0.0042143
												USP27X	1.91965e-07	0.512535	0.101	0.048	0.00454689	BAIAP2L2	1.82558e-07	0.834786	0.063	0.037	0.00432408
												DLK1	2.06867e-07	1.54775	0.106	0.053	0.00489984	FHDC1	1.8819e-07	0.611927	0.296	0.258	0.00445746
												PPP1R17	2.07076e-07	0.866103	0.053	0.015	0.0049048	TUFT1	1.88692e-07	0.54228	0.552	0.53	0.00446935
												TARBP1	2.09948e-07	0.711605	0.401	0.341	0.00497284	PCDH7	1.9201e-07	0.657262	0.106	0.073	0.00454795
												MMP24	2.1587e-07	0.774704	0.195	0.128	0.0051131	ADAM11	1.9614e-07	0.546499	0.169	0.129	0.00464577
												SCRN1	2.16347e-07	0.599503	0.651	0.639	0.0051244	EXOC6B	2.04788e-07	0.555032	0.314	0.272	0.00485061
												ACTA1	2.17106e-07	-2.95058	0.058	0.115	0.00514238	LINC00476	2.05322e-07	0.576669	0.618	0.594	0.00486325
												NUDT10	2.22687e-07	0.72091	0.35	0.274	0.00527456	SIK1	2.05337e-07	0.66695	0.256	0.215	0.00486361
												KAT7	2.2469e-07	0.585318	0.685	0.646	0.00532201	COMMD3	2.09263e-07	0.502152	0.669	0.699	0.00495661
												GOLGA6L9	2.25416e-07	0.558075	0.337	0.246	0.00533921	NYNRIN	2.19548e-07	0.623782	0.434	0.412	0.00520021
												AOX1	2.25784e-07	0.698688	0.099	0.047	0.00534791	PGBD5	2.27048e-07	0.509669	0.116	0.081	0.00537785
												KLHL35	2.28339e-07	0.548222	0.082	0.034	0.00540843	RGS2	2.29133e-07	0.990618	0.221	0.184	0.00542724
												PCDHA5	2.30164e-07	0.641883	0.049	0.013	0.00545167	TRERF1	2.2949e-07	0.545062	0.115	0.081	0.00543569
												TBC1D14	2.34823e-07	0.791873	0.479	0.435	0.00556202	DLGAP4	2.32197e-07	0.558432	0.531	0.525	0.00549981
												ATP2C2	2.57955e-07	0.662408	0.128	0.07	0.00610992	SECISBP2L	2.33274e-07	0.537997	0.486	0.466	0.00552534
												SGCB	2.58698e-07	0.737297	0.897	0.884	0.00612752	TMEM100	2.50842e-07	0.517198	0.039	0.019	0.00594145
												GABRG2	2.60637e-07	0.920893	0.052	0.015	0.00617344	C2CD5	2.52461e-07	0.731089	0.441	0.415	0.00597979
												ZNF747	2.73203e-07	0.505813	0.441	0.365	0.0064711	HDX	2.52551e-07	0.638385	0.153	0.115	0.00598193
												ADCY5	2.88824e-07	0.556382	0.182	0.114	0.00684109	FAM47E	2.70041e-07	0.578989	0.1	0.067	0.00639619
												MKKS	2.92805e-07	0.549749	0.385	0.514	0.00693538	LRRC18	2.70245e-07	0.5076	0.034	0.015	0.00640102
												PCOLCE	2.93281e-07	-1.36242	0.055	0.109	0.00694665	ANKRD44	2.82247e-07	0.766945	0.26	0.217	0.00668531
												SEMA3D	3.09901e-07	0.698966	0.182	0.115	0.0073403	RHOBTB1	2.88793e-07	0.759239	0.163	0.125	0.00684035
												OGDHL	3.11734e-07	0.738837	0.11	0.055	0.00738372	TLR9	3.04725e-07	0.536459	0.037	0.018	0.00721771
												AKR1C2	3.21486e-07	0.697834	0.091	0.042	0.00761472	FTO	3.09866e-07	0.551914	0.68	0.678	0.00733948
												ZCCHC12	3.21595e-07	1.00262	0.064	0.023	0.00761729	PLCXD3	3.10198e-07	0.543633	0.093	0.061	0.00734735
												LRRC49	3.24495e-07	0.519804	0.413	0.323	0.00768599	RAPGEF2	3.16524e-07	0.675324	0.269	0.227	0.00749719
												KCNB1	3.37289e-07	0.516879	0.084	0.036	0.00798902	RADIL	3.46367e-07	0.537675	0.171	0.13	0.00820404
												DCN	3.45136e-07	-1.15407	0.006	0.031	0.00817489	LOC728819	3.49535e-07	-0.838895	0.007	0.023	0.00827908
												ZDHHC15	3.45153e-07	0.57206	0.554	0.477	0.00817529	RNF175	3.61493e-07	0.976398	0.021	0.007	0.00856231
												ANKRD28	3.45202e-07	0.657841	0.42	0.346	0.00817646	RAB9B	3.77293e-07	0.638024	0.172	0.133	0.00893656
												ARSB	3.48934e-07	0.573297	0.612	0.564	0.00826485	TMEM233	3.96485e-07	0.60275	0.163	0.124	0.00939114
												FAM179B	3.60455e-07	0.66532	0.302	0.229	0.00853773	FLJ35946	3.78155e-60	1.9645	0.196	0.072	8.95699e-56
												SORBS2	3.60623e-07	0.518189	0.327	0.246	0.00854171	LOC338651	1.04403e-21	0.636748	0.051	0.013	2.4729e-17
												RDH11	3.68967e-07	0.709594	0.674	0.638	0.00873934	FLJ42709	8.1735e-13	0.893384	0.287	0.225	1.93598e-08
												RGS16	3.91214e-07	-0.774826	0.249	0.341	0.00926629	LOC440297	5.57138e-09	0.511936	0.271	0.222	0.000131964
												LOC254559	1.50454e-41	1.26584	0.466	0.229	3.56365e-37
												LOC283174	4.11409e-41	1.1532	0.578	0.352	9.74463e-37
												LOC440297	1.97631e-17	0.713091	0.604	0.495	4.68108e-13
												LOC643529	1.40025e-15	0.753831	0.168	0.067	3.31664e-11
												FLJ31485	6.24983e-12	0.550635	0.387	0.284	1.48034e-07
												LOC338758	1.23529e-10	0.748503	0.213	0.123	2.92591e-06
												FLJ38109	4.90639e-09	0.508186	0.167	0.093	0.000116213
												LOC100132273	2.73914e-08	0.692048	0.295	0.211	0.000648794
												LOC727849	3.67682e-08	0.52287	0.326	0.254	0.000870892
												LOC100507433	5.06286e-08	0.837098	0.171	0.098	0.00119919
												LOC283761	1.31812e-07	0.81881	0.108	0.052	0.00312211
												FLJ34208	1.98434e-07	1.03367	0.071	0.028	0.0047001
[truncated: 4 more columns]

## Sheet: Table S5 LncRNAs-Target genes
LncRNA	clade specificity	Target	chromosome	DBS address（ Binding affinity）	Bayes_Cor	lncRNA's logFC	lncRNA p_val_adj	Target gene's logFC	Target gene p_val_adj	Dataset
XIST	conserved	DNM3	chr1	171810456-171810850 (276.5);	-0.595472	0.796873	6.09534e-42	0.778825	1.87659e-45	GSE102130
FLJ46906	simian-specific	DNM3	chr1	171810470-171810794 (208.0);	-0.438464	-0.747556	0.000505694	0.778825	1.87659e-45	GSE102130
XIST	conserved	GABBR1	chr6	29600823-29601157 (244.55);	-0.6164	0.796873	6.09534e-42	1.31721	6.12315e-79	GSE102130
LOC100216479	simian-specific	GABBR1	chr6	29601028-29601390 (239.58);	-0.539498	0.728001	1.33732e-32	1.31721	6.12315e-79	GSE102130
LOC286437	simian-specific	GABBR1	chr6	29600825-29601402 (375.7);	-0.503924	0.567989	3.71107e-47	1.31721	6.12315e-79	GSE102130
XIST	conserved	GLRB	chr4	157997166-157997448 (203.76);	-0.665366	0.796873	6.09534e-42	1.23445	7.5273e-18	GSE102130
PAR5	simian-specific	GLRB	chr4	157997180-157997422 (157.95);	-0.415673	0.876462	1.94861e-13	1.23445	7.5273e-18	GSE102130
LINC00485	simian-specific	GRIA3	chrX	122318052-122318274 (158.33);	-0.470749	-0.6516	1.7867e-08	1.46	7.78866e-106	GSE102130
XIST	conserved	GRIA3	chrX	122318050-122318276 (170.25);	-0.699648	0.796873	6.09534e-42	1.46	7.78866e-106	GSE102130
LOC100216479	simian-specific	GRIA3	chrX	122318063-122318276 (154.08);	-0.490469	0.728001	1.33732e-32	1.46	7.78866e-106	GSE102130
LOC286437	simian-specific	GRIA3	chrX	122318050-122318278 (151.14);	-0.599108	0.567989	3.71107e-47	1.46	7.78866e-106	GSE102130
XIST	conserved	GRIA4	chr11	105480975-105481343 (250.92);	-0.678957	0.796873	6.09534e-42	1.37557	1.00626e-121	GSE102130
XIST	conserved	GRIK2	chr6	101841502-101841739 (166.6);	-0.591652	0.796873	6.09534e-42	1.01859	7.67455e-40	GSE102130
LOC100216479	simian-specific	GRIK2	chr6	101841502-101841714 (155.49);	-0.491106	0.728001	1.33732e-32	1.01859	7.67455e-40	GSE102130
XIST	conserved	GRIK3	chr1	37498887-37499102 (155.52);37499674-37500291 (451.14);37500350-37500624 (198.0);	-0.597432	0.796873	6.09534e-42	1.01422	1.51143e-41	GSE102130
PAR5	simian-specific	GRIK3	chr1	37499882-37500116 (150.4);	-0.439032	0.876462	1.94861e-13	1.01422	1.51143e-41	GSE102130
XIST	conserved	GRIK4	chr11	120382169-120382836 (494.32);	-0.51294	0.796873	6.09534e-42	0.845073	8.31224e-21	GSE102130
LOC100216479	simian-specific	GRIK4	chr11	120382600-120382827 (157.32);	-0.412934	0.728001	1.33732e-32	0.845073	8.31224e-21	GSE102130
XIST	conserved	INA	chr10	105037323-105037639 (225.07);	-0.531641	0.796873	6.09534e-42	1.84858	2.43647e-37	GSE102130
LOC441204	simian-specific	MAP2	chr2	210288453-210288835 (237.46);	-0.516417	0.806835	2.63997e-14	0.930525	5.09971e-92	GSE102130
ZNF718	simian-specific	MAP2	chr2	210288440-210288905 (307.56);	-0.447067	0.637564	6.42927e-05	0.930525	5.09971e-92	GSE102130
XIST	conserved	MAP2	chr2	210288480-210288855 (263.2);	-0.641211	0.796873	6.09534e-42	0.930525	5.09971e-92	GSE102130
LOC100216479	simian-specific	MAP2	chr2	210288596-210288906 (217.7);	-0.602691	0.728001	1.33732e-32	0.930525	5.09971e-92	GSE102130
FLJ46906	simian-specific	MAP2	chr2	210288508-210288886 (242.56);	-0.472108	-0.747556	0.000505694	0.930525	5.09971e-92	GSE102130
PAR5	simian-specific	MAP2	chr2	210288521-210288842 (206.08);	-0.578327	0.876462	1.94861e-13	0.930525	5.09971e-92	GSE102130
FLJ13197	simian-specific	MAP2	chr2	210288508-210288818 (199.04);	-0.416524	0.519365	1.45989e-07	0.930525	5.09971e-92	GSE102130
XIST	conserved	NLGN2	chr17	7308083-7308318 (165.2);7308638-7308871 (170.82);7309429-7309679 (183.23);	-0.536397	0.796873	6.09534e-42	0.573417	9.38255e-14	GSE102130
XIST	conserved	NLGN3	chrX	70365775-70366069 (218.3);	-0.687575	0.796873	6.09534e-42	1.63016	2.4093e-130	GSE102130
MGC2889	conserved	NLGN3	chrX	70365738-70366070 (216.45);	-0.507716	1.14169	1.74096e-13	1.63016	2.4093e-130	GSE102130
LOC286437	simian-specific	NLGN3	chrX	70365775-70366024 (170.0);	-0.608064	0.567989	3.71107e-47	1.63016	2.4093e-130	GSE102130
ILF3-AS1	simian-specific	NLGN3	chrX	70365812-70366060 (161.85);	-0.587993	0.616369	4.8977e-09	1.63016	2.4093e-130	GSE102130
ZNF718	simian-specific	NRCAM	chr7	108096786-108097027 (159.72);	-0.452186	0.637564	6.42927e-05	1.42239	5.91517e-84	GSE102130
XIST	conserved	NRCAM	chr7	108095645-108095863 (153.3);108096773-108097030 (188.34);	-0.659874	0.796873	6.09534e-42	1.42239	5.91517e-84	GSE102130
XIST	conserved	PTPRS	chr19	5339725-5340034 (223.2);5340066-5340357 (210.24);5340646-5341011 (263.52);	-0.577469	0.796873	6.09534e-42	1.10715	4.16837e-115	GSE102130
LOC100216479	simian-specific	PTPRS	chr19	5340084-5340320 (156.42);	-0.553776	0.728001	1.33732e-32	1.10715	4.16837e-115	GSE102130
FTX	conserved	GRIK2	chr6	101841487-101841723 (177.75);	-0.50637	0.728411	2.57781e-31	1.66579	4.57232e-165	GSE119926
FTX	conserved	INA	chr10	105037380-105037618 (174.47);	-0.557481	0.728411	2.57781e-31	1.79111	2.96921e-141	GSE119926
LINC00599	conserved	INA	chr10	105037329-105037621 (187.52);	-0.504555	0.999016	7.36599e-64	1.79111	2.96921e-141	GSE119926
LOC283683	simian-specific	MAP2	chr2	210288519-210288789 (173.44);	-0.541955	1.4395	9.71496e-29	1.15697	6.96575e-215	GSE119926
FTX	conserved	MAP2	chr2	210288439-210288905 (345.58);	-0.558699	0.728411	2.57781e-31	1.15697	6.96575e-215	GSE119926
LOC646278	simian-specific	MAP2	chr2	210288447-210288884 (280.32);	-0.479389	1.97864	2.03098e-63	1.15697	6.96575e-215	GSE119926
LINC00599	conserved	MAP2	chr2	210288479-210288886 (261.12);	-0.504384	0.999016	7.36599e-64	1.15697	6.96575e-215	GSE119926
FLJ13197	simian-specific	MAP2	chr2	210288508-210288818 (199.04);	-0.477116	0.556166	1.40518e-15	1.15697	6.96575e-215	GSE119926
LOC283683	simian-specific	NRCAM	chr7	108096773-108097018 (150.06);	-0.529562	1.4395	9.71496e-29	1.2083	1.10095e-95	GSE119926
FTX	conserved	NRCAM	chr7	108096767-108097030 (200.64);	-0.547676	0.728411	2.57781e-31	1.2083	1.10095e-95	GSE119926
LINC00599	conserved	NRCAM	chr7	108095628-108095879 (156.24);108096684-108097028 (220.8);	-0.563981	0.999016	7.36599e-64	1.2083	1.10095e-95	GSE119926
FTX	conserved	PTPRS	chr19	5340642-5340971 (237.6);	-0.52421	0.728411	2.57781e-31	0.918634	1.1285e-236	GSE119926
LINC00599	conserved	PTPRS	chr19	5340053-5340352 (195.0);5340658-5341009 (225.28);	-0.534946	0.999016	7.36599e-64	0.918634	1.1285e-236	GSE119926
LINC00461	conserved	CADM1	chr11	115374080-115374400 (215.07);115374967-115375327 (241.87);	-0.576583	0.950119	0.000468862	1.28503	1.30419e-21	GSE119926_PDX
LINC00461	conserved	INA	chr10	105037294-105037630 (225.79);	-0.538485	0.950119	0.000468862	1.3266	2.88519e-09	GSE119926_PDX
LINC00461	conserved	MAP2	chr2	210288479-210288906 (282.48);	-0.539203	0.950119	0.000468862	1.17608	9.07035e-17	GSE119926_PDX
LINC00461	conserved	PTPRS	chr19	5339807-5340031 (157.5);5340053-5340357 (204.35);5340713-5340994 (186.12);	-0.47545	0.950119	0.000468862	1.09352	2.99118e-29	GSE119926_PDX
LINC00599	conserved	CADM1	chr11	115374962-115375239 (175.14);	-0.437405	1.3827	1.43823e-30	0.778589	2.47259e-44	GSE131928
LOC150622	simian-specific	GABBR1	chr6	29600104-29600361 (162.54);29600825-29601407 (367.29);	-0.401013	0.97501	8.6016e-29	0.836617	9.17143e-62	GSE131928
LINC00645	simian-specific	GRIA3	chrX	122318052-122318273 (153.18);	-0.401063	-1.14545	2.7789e-06	1.21984	5.51423e-109	GSE131928
LOC150622	simian-specific	GRIA4	chr11	105480971-105481431 (285.82);	-0.423851	0.97501	8.6016e-29	1.4173	4.73813e-107	GSE131928
NEAT1	conserved	INA	chr10	105037335-105037576 (191.18);	-0.528235	-0.65659	5.40959e-42	1.51675	1.59312e-33	GSE131928
LOC441204	simian-specific	MAP2	chr2	210288453-210288835 (237.46);	-0.572737	0.577557	0.000239697	1.15746	6.12524e-200	GSE131928
LINC00673	conserved	MAP2	chr2	210288595-210288835 (151.83);	-0.584838	0.75725	1.43927e-22	1.15746	6.12524e-200	GSE131928
LINC00599	conserved	MAP2	chr2	210288479-210288886 (261.12);	-0.440769	1.3827	1.43823e-30	1.15746	6.12524e-200	GSE131928
LOC150622	simian-specific	MAP2	chr2	210288501-210288905 (255.15);	-0.422907	0.97501	8.6016e-29	1.15746	6.12524e-200	GSE131928
MGC2889	conserved	NLGN3	chrX	70365738-70366070 (216.45);	-0.463154	1.05153	3.28824e-09	0.937513	1.85029e-88	GSE131928
LOC150568	simian-specific	NLGN3	chrX	70365858-70366097 (163.2);	-0.559858	0.965421	2.51015e-35	0.937513	1.85029e-88	GSE131928
LOC150622	simian-specific	NLGN3	chrX	70365793-70366069 (174.51);	-0.520364	0.97501	8.6016e-29	0.937513	1.85029e-88	GSE131928
LINC00599	conserved	NRCAM	chr7	108095628-108095879 (156.24);108096684-108097028 (220.8);	-0.459444	1.3827	1.43823e-30	0.666788	1.2462e-56	GSE131928
LOC150622	simian-specific	NRCAM	chr7	108096765-108097028 (163.68);	-0.499851	0.97501	8.6016e-29	0.666788	1.2462e-56	GSE131928
XIST	conserved	DNM3	chr1	171810456-171810850 (276.5);	-0.507504	0.676538	9.36837e-09	1.33543	6.66917e-36	GSE131928_pediatric
FLJ46906	simian-specific	DNM3	chr1	171810470-171810794 (208.0);	-0.406414	-0.771346	2.89763e-06	1.33543	6.66917e-36	GSE131928_pediatric
XIST	conserved	GRIA3	chrX	122318050-122318276 (170.25);	-0.59481	0.676538	9.36837e-09	1.14801	1.88688e-20	GSE131928_pediatric
XIST	conserved	GRIA4	chr11	105480975-105481343 (250.92);	-0.558632	0.676538	9.36837e-09	0.787261	4.2602e-09	GSE131928_pediatric
LINC00599	conserved	GRIA4	chr11	105480972-105481433 (286.44);	-0.428701	1.1978	0.00261285	0.787261	4.2602e-09	GSE131928_pediatric
MIR22HG	conserved	GRIA4	chr11	105481086-105481327 (162.14);	-0.410756	-0.581727	9.57063e-07	0.787261	4.2602e-09	GSE131928_pediatric
LOC150622	simian-specific	GRIA4	chr11	105480971-105481431 (285.82);	-0.456504	0.911958	7.18169e-19	0.787261	4.2602e-09	GSE131928_pediatric
XIST	conserved	GRIK2	chr6	101841502-101841739 (166.6);	-0.493106	0.676538	9.36837e-09	1.27015	1.8787e-32	GSE131928_pediatric
XIST	conserved	GRIK3	chr1	37498887-37499102 (155.52);37499674-37500291 (451.14);37500350-37500624 (198.0);	-0.59083	0.676538	9.36837e-09	1.2325	3.28028e-33	GSE131928_pediatric
FLJ46906	simian-specific	GRIK3	chr1	37499724-37500111 (240.56);37500352-37500618 (168.21);	-0.40463	-0.771346	2.89763e-06	1.2325	3.28028e-33	GSE131928_pediatric
XIST	conserved	INA	chr10	105037323-105037639 (225.07);	-0.484347	0.676538	9.36837e-09	1.49978	1.14174e-10	GSE131928_pediatric
XIST	conserved	MAP2	chr2	210288480-210288855 (263.2);	-0.624642	0.676538	9.36837e-09	1.03158	4.49228e-73	GSE131928_pediatric
LOC283683	simian-specific	MAP2	chr2	210288519-210288789 (173.44);	-0.427793	0.685486	1.63282e-05	1.03158	4.49228e-73	GSE131928_pediatric
FLJ46906	simian-specific	MAP2	chr2	210288508-210288886 (242.56);	-0.526607	-0.771346	2.89763e-06	1.03158	4.49228e-73	GSE131928_pediatric
LINC00599	conserved	MAP2	chr2	210288479-210288886 (261.12);	-0.452574	1.1978	0.00261285	1.03158	4.49228e-73	GSE131928_pediatric
FLJ42875	conserved	MAP2	chr2	210288593-210288895 (196.95);	-0.459858	-1.02086	3.40379e-21	1.03158	4.49228e-73	GSE131928_pediatric
FLJ13197	simian-specific	MAP2	chr2	210288508-210288818 (199.04);	-0.42231	0.617763	0.000797522	1.03158	4.49228e-73	GSE131928_pediatric
XIST	conserved	NLGN2	chr17	7308083-7308318 (165.2);7308638-7308871 (170.82);7309429-7309679 (183.23);	-0.545441	0.676538	9.36837e-09	0.625766	0.00118765	GSE131928_pediatric
XIST	conserved	NLGN3	chrX	70365775-70366069 (218.3);	-0.65828	0.676538	9.36837e-09	0.656689	6.14535e-11	GSE131928_pediatric
LOC150568	simian-specific	NLGN3	chrX	70365858-70366097 (163.2);	-0.593328	1.33771	2.57202e-15	0.656689	6.14535e-11	GSE131928_pediatric
LOC150622	simian-specific	NLGN3	chrX	70365793-70366069 (174.51);	-0.527887	0.911958	7.18169e-19	0.656689	6.14535e-11	GSE131928_pediatric
XIST	conserved	PTPRS	chr19	5339725-5340034 (223.2);5340066-5340357 (210.24);5340646-5341011 (263.52);	-0.584586	0.676538	9.36837e-09	0.897166	3.29345e-36	GSE131928_pediatric
LINC00599	conserved	PTPRS	chr19	5340053-5340352 (195.0);5340658-5341009 (225.28);	-0.460772	1.1978	0.00261285	0.897166	3.29345e-36	GSE131928_pediatric
Miat	rodent-specific	Gria2	chr3	80802673-80802922 (170.0);	-0.293612	0.540402	9.8542e-139	0.708772	1.87801e-269	GSE150752
XIST	conserved	DNM3	chr1	171810456-171810850 (276.5);	-0.53234	-1.57041	9.52e-84	1.11904	4.28e-53	GSE70630
FLJ46906	simian-specific	DNM3	chr1	171810470-171810794 (208.0);	-0.44863	-1.51878	4.63e-20	1.11904	4.28e-53	GSE70630
XIST	conserved	GABBR1	chr6	29600823-29601157 (244.55);	-0.63352	-1.57041	9.52e-84	0.511219	2.59e-28	GSE70630
LOC100216545	simian-specific	GABBR1	chr6	29600824-29601393 (359.1);	-0.60528	-0.93507	1.61e-15	0.511219	2.59e-28	GSE70630
LOC100499405	simian-specific	GABBR1	chr6	29600072-29600397 (215.16);29600824-29601403 (377.0);	-0.46613	0.52303	2.63e-05	0.511219	2.59e-28	GSE70630
LINC00599	conserved	GABBR1	chr6	29600071-29600378 (197.12);29600829-29601212 (249.6);	-0.61773	0.806852	1.83e-19	0.511219	2.59e-28	GSE70630
FAM66B	simian-specific	GABBR1	chr6	29600849-29601159 (205.26);	-0.47927	0.680556	2.35e-11	0.511219	2.59e-28	GSE70630
XIST	conserved	GLRB	chr4	chr4:157997166-157997448	-0.50913	-1.57041	9.52e-84	1.28037	6.9e-44	GSE70630
LOC100216545	simian-specific	GLRB	chr4	157997159-157997436 (172.36);	-0.5761	-0.93507	1.61e-15	1.28037	6.9e-44	GSE70630
FLJ46906	simian-specific	GLRB	chr4	157997160-157997447 (184.32);	-0.43914	-1.51878	4.63e-20	1.28037	6.9e-44	GSE70630
PAR5	simian-specific	GLRB	chr4	157997180-157997422 (157.95);	-0.48032	0.703542	0.000576	1.28037	6.9e-44	GSE70630
LINC00599	conserved	GLRB	chr4	157997163-157997449 (183.68);	-0.48316	0.806852	1.83e-19	1.28037	6.9e-44	GSE70630
XIST	conserved	GRIA3	chrX	122318050-122318276 (170.25);	-0.53952	-1.57041	9.52e-84	0.774865	1.07e-24	GSE70630
LOC100499405	simian-specific	GRIA3	chrX	122318055-122318303 (164.34);	-0.42075	0.52303	2.63e-05	0.774865	1.07e-24	GSE70630
XIST	conserved	GRIA4	chr11	105480975-105481343 (250.92);	-0.58637	-1.57041	9.52e-84	1.02239	9.76e-55	GSE70630
LOC100216545	simian-specific	GRIA4	chr11	105480983-105481332 (224.0);	-0.62625	-0.93507	1.61e-15	1.02239	9.76e-55	GSE70630
LOC100499405	simian-specific	GRIA4	chr11	105480762-105481340 (364.77);	-0.44687	0.52303	2.63e-05	1.02239	9.76e-55	GSE70630
LINC00599	conserved	GRIA4	chr11	105480972-105481433 (286.44);	-0.5615	0.806852	1.83e-19	1.02239	9.76e-55	GSE70630
MIR22HG	conserved	GRIA4	chr11	105481086-105481327 (162.14);	-0.42523	-0.91615	0.001938	1.02239	9.76e-55	GSE70630
LOC100505835	simian-specific	GRIA4	chr11	105481043-105481339 (184.14);	-0.41496	-0.74739	2.07e-05	1.02239	9.76e-55	GSE70630
FAM66B	simian-specific	GRIA4	chr11	105480972-105481428 (301.62);	-0.47058	0.680556	2.35e-11	1.02239	9.76e-55	GSE70630
XIST	conserved	GRIK2	chr6	101841502-101841739 (166.6);	-0.68012	-1.57041	9.52e-84	1.14624	2.15e-101	GSE70630
LOC100216545	simian-specific	GRIK2	chr6	101841487-101841737 (160.64);	-0.64978	-0.93507	1.61e-15	1.14624	2.15e-101	GSE70630
LOC100499405	simian-specific	GRIK2	chr6	101841484-101841746 (170.95);	-0.41521	0.52303	2.63e-05	1.14624	2.15e-101	GSE70630
FAM66B	simian-specific	GRIK2	chr6	101841485-101841725 (161.47);	-0.42696	0.680556	2.35e-11	1.14624	2.15e-101	GSE70630
XIST	conserved	GRIK4	chr11	120382169-120382836 (494.32);	-0.47391	-1.57041	9.52e-84	1.1874	4.81e-38	GSE70630
LOC100216545	simian-specific	GRIK4	chr11	120382171-120382454 (178.92);120382470-120382822 (225.92);	-0.51092	-0.93507	1.61e-15	1.1874	4.81e-38	GSE70630
LINC00599	conserved	GRIK4	chr11	120382181-120382452 (176.8);120382465-120382779 (207.9);	-0.4387	0.806852	1.83e-19	1.1874	4.81e-38	GSE70630
XIST	conserved	INA	chr10	105037323-105037639 (225.07);	-0.56821	-1.57041	9.52e-84	0.61257	7e-20	GSE70630
LOC100216545	simian-specific	INA	chr10	105037335-105037638 (188.48);	-0.64608	-0.93507	1.61e-15	0.61257	7e-20	GSE70630
FLJ46906	simian-specific	INA	chr10	105037335-105037734 (248.0);	-0.53453	-1.51878	4.63e-20	0.61257	7e-20	GSE70630
PAR5	simian-specific	INA	chr10	105037322-105037590 (180.23);	-0.57694	0.703542	0.000576	0.61257	7e-20	GSE70630
LOC100499405	simian-specific	INA	chr10	105037018-105037278 (174.87);105037323-105037640 (206.7);	-0.48576	0.52303	2.63e-05	0.61257	7e-20	GSE70630
LINC00599	conserved	INA	chr10	105037329-105037621 (187.52);	-0.56092	0.806852	1.83e-19	0.61257	7e-20	GSE70630
LOC100505835	simian-specific	INA	chr10	105037327-105037596 (170.1);	-0.43673	-0.74739	2.07e-05	0.61257	7e-20	GSE70630
FAM66B	simian-specific	INA	chr10	105037373-105037621 (164.34);	-0.5	0.680556	2.35e-11	0.61257	7e-20	GSE70630
XIST	conserved	MAP2	chr2	210288480-210288855 (263.2);	-0.63085	-1.57041	9.52e-84	0.837572	1.36e-66	GSE70630
LOC100216545	simian-specific	MAP2	chr2	210288478-210288892 (261.45);	-0.62662	-0.93507	1.61e-15	0.837572	1.36e-66	GSE70630
FLJ46906	simian-specific	MAP2	chr2	210288508-210288886 (242.56);	-0.56028	-1.51878	4.63e-20	0.837572	1.36e-66	GSE70630
PAR5	simian-specific	MAP2	chr2	210288521-210288842 (206.08);	-0.55982	0.703542	0.000576	0.837572	1.36e-66	GSE70630
LOC100499405	simian-specific	MAP2	chr2	210288478-210288905 (273.92);	-0.4166	0.52303	2.63e-05	0.837572	1.36e-66	GSE70630
LINC00599	conserved	MAP2	chr2	210288479-210288886 (261.12);	-0.60823	0.806852	1.83e-19	0.837572	1.36e-66	GSE70630
FAM66B	simian-specific	MAP2	chr2	210288512-210288906 (256.75);	-0.43419	0.680556	2.35e-11	0.837572	1.36e-66	GSE70630
LOC100499405	simian-specific	NLGN1	chr3	173113525-173113920 (257.4);	-0.42223	0.52303	2.63e-05	1.13298	3.78e-68	GSE70630
XIST	conserved	NLGN3	chrX	70365775-70366069 (218.3);	-0.65009	-1.57041	9.52e-84	0.88487	1.69e-66	GSE70630
LOC100499405	simian-specific	NLGN3	chrX	70365793-70366069 (182.82);	-0.46539	0.52303	2.63e-05	0.88487	1.69e-66	GSE70630
FAM66B	simian-specific	NLGN3	chrX	70365805-70366070 (180.88);	-0.46253	0.680556	2.35e-11	0.88487	1.69e-66	GSE70630
XIST	conserved	NRCAM	chr7	108095645-108095863 (153.3);108096773-108097030 (188.34);	-0.54116	-1.57041	9.52e-84	0.725941	3.34e-25	GSE70630
LOC100216545	simian-specific	NRCAM	chr7	108096771-108097029 (163.17);	-0.59675	-0.93507	1.61e-15	0.725941	3.34e-25	GSE70630
LOC100499405	simian-specific	NRCAM	chr7	108095628-108095887 (169.0);108096760-108097030 (181.57);	-0.45355	0.52303	2.63e-05	0.725941	3.34e-25	GSE70630
LINC00599	conserved	NRCAM	chr7	108095628-108095879 (156.24);108096684-108097028 (220.8);	-0.58799	0.806852	1.83e-19	0.725941	3.34e-25	GSE70630
FAM66B	simian-specific	NRCAM	chr7	108096793-108097021 (158.01);	-0.49014	0.680556	2.35e-11	0.725941	3.34e-25	GSE70630
XIST	conserved	PTPRS	chr19	5339725-5340034 (223.2);5340066-5340357 (210.24);5340646-5341011 (263.52);	-0.6851	-1.57041	9.52e-84	0.796663	2.62e-91	GSE70630
LOC100216545	simian-specific	PTPRS	chr19	5339807-5340049 (150.66);5340060-5340377 (200.34);5340694-5341011 (200.34);	-0.63439	-0.93507	1.61e-15	0.796663	2.62e-91	GSE70630
LINC00599	conserved	PTPRS	chr19	5340053-5340352 (195.0);5340658-5341009 (225.28);	-0.61275	0.806852	1.83e-19	0.796663	2.62e-91	GSE70630
LINC00599	conserved	CADM1	chr11	115374962-115375239 (175.14);	-0.547967	1.47024	2.82017e-31	0.943188	6.60301e-55	GSE89567
LINC00599	conserved	GABBR1	chr6	29600071-29600378 (197.12);29600829-29601212 (249.6);	-0.572165	1.47024	2.82017e-31	0.725084	9.04639e-72	GSE89567
LOC441204	simian-specific	GLRB	chr4	157997182-157997426 (161.7);	-0.601193	0.523401	3.18605e-07	1.00572	4.37892e-35	GSE89567
LOC100126784	conserved	GLRB	chr4	157997174-157997424 (155.62);	-0.408486	-0.61281	1.20813e-23	1.00572	4.37892e-35	GSE89567
LINC00599	conserved	GLRB	chr4	157997163-157997449 (183.68);	-0.508547	1.47024	2.82017e-31	1.00572	4.37892e-35	GSE89567
LINC00599	conserved	GRIA4	chr11	105480972-105481433 (286.44);	-0.566617	1.47024	2.82017e-31	0.901026	9.33896e-52	GSE89567
[truncated: 8 more rows]

## Sheet: Table S6 NGS gene exp levels
Human gene	IDH1-mutant AA	H3K27M glioma	OD	MB	MB PDX	GBM	pediatric-GBM		Mouse gene	MB trasngenic	GBM transgenic
[truncated: 33 more rows]

[truncated: 1 more sheets: Table S7 Survival data]
